# Supplementary material
Source: PubMed Central journal article supplement (PMC4871165)
Supplement: NIHMS785690-supplement-Supporting_Info.pdf [file NIHMS785690-supplement-Supporting_Info.pdf]

# Supporting Information

## **Enantioselective Alcohol C-H Functionalization for Polyketide Construction: Unlocking Redox-Economy and Site-Selectivity for Ideal Chemical Synthesis**

Jiajie Feng, Zachary A. Kasun and Michael J. Krische

*University of Texas at Austin, Department of Chemistry,  
Austin, TX 78712, USA*

### **Table of Contents:**

|                                                                                                  |             |
|--------------------------------------------------------------------------------------------------|-------------|
| <b>Rules for Calculating Step Counts .....</b>                                                   | <b>S2</b>   |
| <b>Graphical Summary of Previous Syntheses of Psyberin (Irciniastatin A) .....</b>               | <b>S3</b>   |
| <b>Graphical Summary of Previous Syntheses of Neopeltolide .....</b>                             | <b>S19</b>  |
| <b>Graphical Summary of Previous Syntheses of Mandelalide .....</b>                              | <b>S38</b>  |
| <b>Graphical Summary of Previous Syntheses of Oridamycins .....</b>                              | <b>S50</b>  |
| <b>Graphical Summary of Previous Syntheses of Xiamycin A .....</b>                               | <b>S54</b>  |
| <b>Graphical Summary of Previous Syntheses of Triene-Containing C17-Benzene Ansamycins .....</b> | <b>S56</b>  |
| <b>Graphical Summary of Previous Syntheses of Roxaticin .....</b>                                | <b>S64</b>  |
| <b>Graphical Summary of Previous Syntheses of Bryostatins .....</b>                              | <b>S70</b>  |
| <b>Graphical Summary of Previous Syntheses of Swinholide Fragments .....</b>                     | <b>S84</b>  |
| <b>Graphical Summary of Previous Syntheses of Erythromycins .....</b>                            | <b>S87</b>  |
| <b>Graphical Summary of Previous Syntheses of Cyanolide A and Clavosolide A .....</b>            | <b>S110</b> |
| <b>Graphical Summary of Previous Syntheses of Zincophorin .....</b>                              | <b>S128</b> |
| <b>Graphical Summary of Previous Syntheses of Cryptocaryol A .....</b>                           | <b>S137</b> |

## **Rules for Calculating Step Counts**

*“Given the fact that every reaction may be optimized... the total number of chemical transformations is the only variable in the determination of strategic efficiency.”* Qiu, F. *Can J. Chem.* 2008, 86, 903. In our analysis, a step is defined as an operation that does not involve any intervening purification/separation, including removal of solvent, commencing with compounds that are over \$50/gram. The longest linear sequence (LLS) refers to the longest route from a starting material to the natural product. Total steps (TS) account for steps outside the longest linear sequence. Stoichiometric reagents, such as chiral auxiliaries, that are not commercially available for less than \$50 USD/g that require synthesis contribute to step count. Substoichiometric reagents, such as catalysts and ligands that require synthesis do not contribute to step count. In formal syntheses, step counts are calculated up to the fragment that intercepts the total synthesis and therefrom to the natural product.

## Graphical Summary of Previous Syntheses of Psyberin (Irciniastatin A)

A. De Brabander *et al.* *J. Am. Chem. Soc.* **2005**, *127*, 11254; *J. Am. Chem. Soc.* **2012**, *134*, 17083.

### Fragment 1

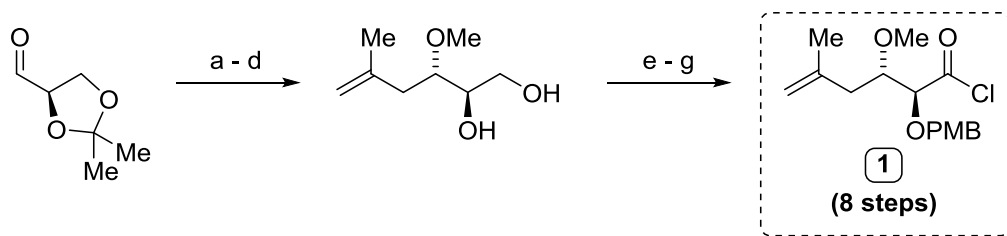

Key: a)  $(-)(\text{Ipc})_2\text{BOMe}$ ,  $\text{CH}_2=\text{C}(\text{Me})\text{CH}_2\text{Li}$ ; b) NaH, MeI; c) PPTS; d) TBSCl, Imidazole; e) PMBCl; f) DMP; g)  $\text{NaClO}_2$ ,  $\text{NaH}_2\text{PO}_4$ , 2-Me-2-butene h)  $\text{COCl}_2$ .

### Fragment 2

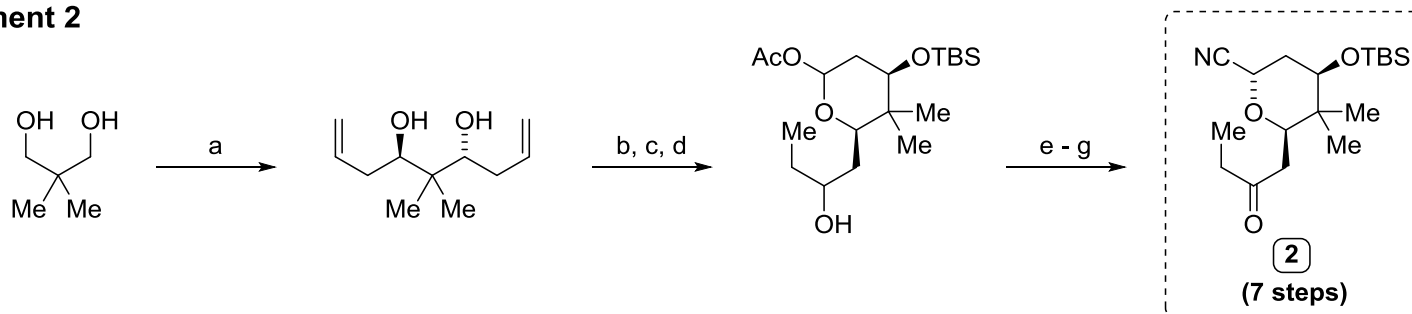

Key: a)  $[\text{Ir}(\text{cod})\text{Cl}]_2$ ,  $(R)\text{-Cl,MeO-BIPHEP}$ ,  $\text{Cs}_2\text{CO}_3$ , 4-Cl-3-NO<sub>2</sub>-BzOH, allyl acetate; b) TBSOTf, 2,6-lutidine; c) O<sub>3</sub>, then PPh<sub>3</sub>; d) Ac<sub>2</sub>O, NEt<sub>3</sub>, DMAP; e) Et<sub>2</sub>Zn, Ti(O*i*-Pr)<sub>4</sub>, *N,N'*-(1*R*,2*R*-cyclohexane-1,2-diyl)bis(trifluoromethanesulfonamide), Et<sub>2</sub>Zn; f) TMSCN, then ZnI<sub>2</sub>, then HCl; g) DMP.

A. De Brabander *et al.* *J. Am. Chem. Soc.* **2005**, *127*, 11254; *J. Am. Chem. Soc.* **2012**, *134*, 17083. (Cont'd)

### Fragment 3

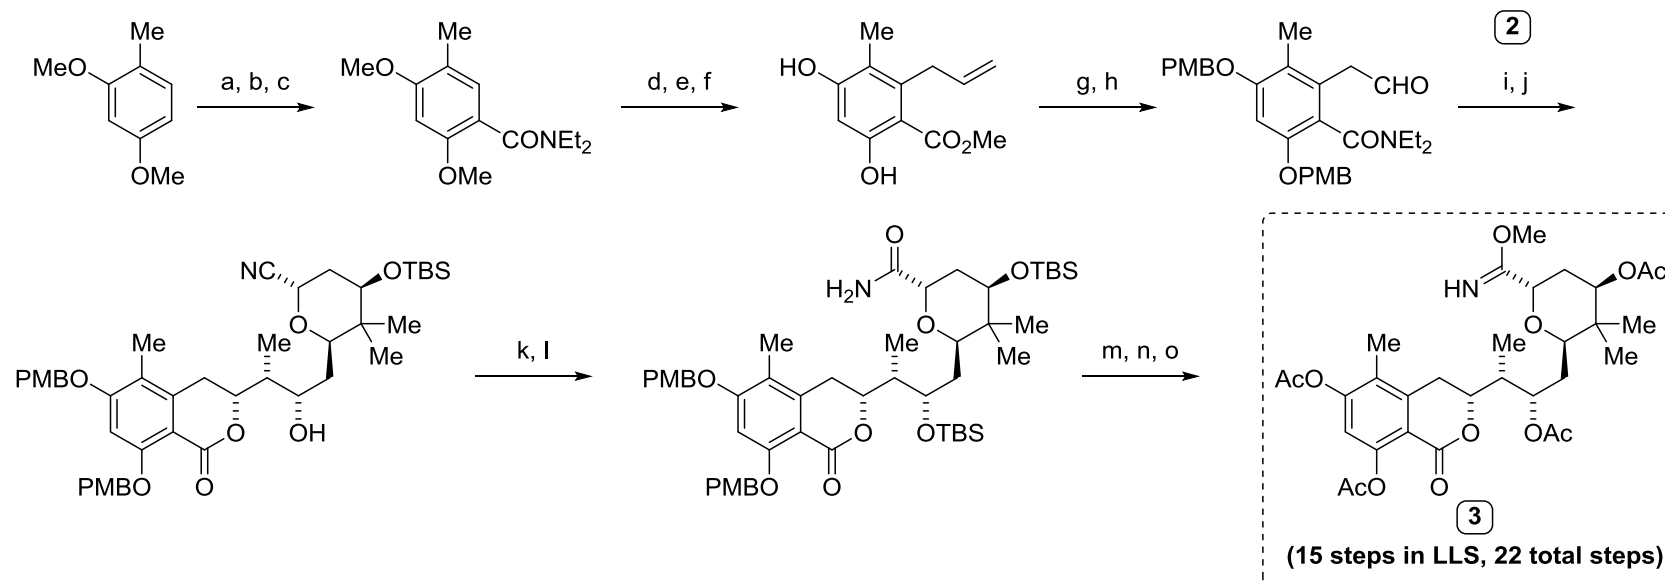

Key: a) DMF POCl<sub>3</sub>; b) NaH<sub>2</sub>PO<sub>4</sub>, NaClO<sub>2</sub>, 2-Me-2-butene; c) SOCl<sub>2</sub>, Et<sub>2</sub>NH; d) *s*-BuLi, CuBr-SMe<sub>2</sub>, H<sub>2</sub>C=CHCH<sub>2</sub>Br; e) BBr<sub>3</sub>; f) Me<sub>3</sub>O-BF<sub>4</sub>, Na<sub>2</sub>CO<sub>3</sub>; g) PMBCl, TBAI, K<sub>2</sub>CO<sub>3</sub>; h) OsO<sub>4</sub> (cat.), NMO, NaIO<sub>4</sub>; i) **2**, PhBCl<sub>2</sub>, *i*-Pr<sub>2</sub>NEt; j) HB(cat), NaOH; k) TBAF; l) EtOH/ H<sub>2</sub>O, [PtH(PMe<sub>2</sub>OH)(PMe<sub>2</sub>O)H]; m) H<sub>2</sub>, Pd/C; n) Ac<sub>2</sub>O, pyridine; o) Me<sub>3</sub>O-BF<sub>4</sub>, PVP.

### Fragment Union and End Game

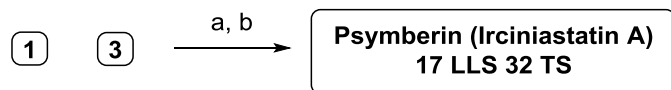

Key: a) *i*-Pr<sub>2</sub>NEt, **1**, then NaBH<sub>4</sub>; b) LiOH.

B. Huang *et al. Org. Lett.* **2007**, *9*, 2597.

### Fragment 1

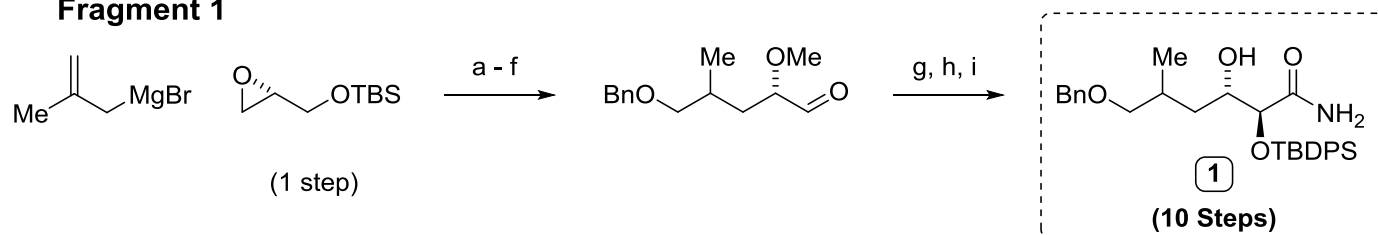

Key: a) CuI; b) Me<sub>3</sub>O-BF<sub>4</sub>, proton sponge; c) BH<sub>3</sub>, then H<sub>2</sub>O<sub>2</sub>, NaOH; d) BnBr, NaH; e) TBAF; f) (COCl)<sub>2</sub>, DMSO, NEt<sub>3</sub>; g) TMSCN, AlCl<sub>3</sub>; h) TBDPSCI, NEt<sub>3</sub>, DMAP; i) MeCONH<sub>2</sub>, PdCl<sub>2</sub>, H<sub>2</sub>O.

### Fragment 2

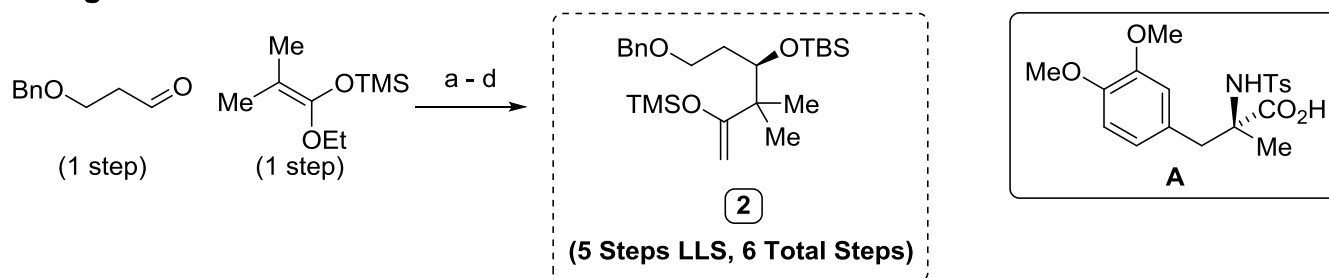

Key: a) BH<sub>3</sub>-THF, **A**; b) TBSOTf, 2,6-lutidine; c) TMSCH<sub>2</sub>Li; d) TMSOTf, NEt<sub>3</sub>.

### Fragment 3

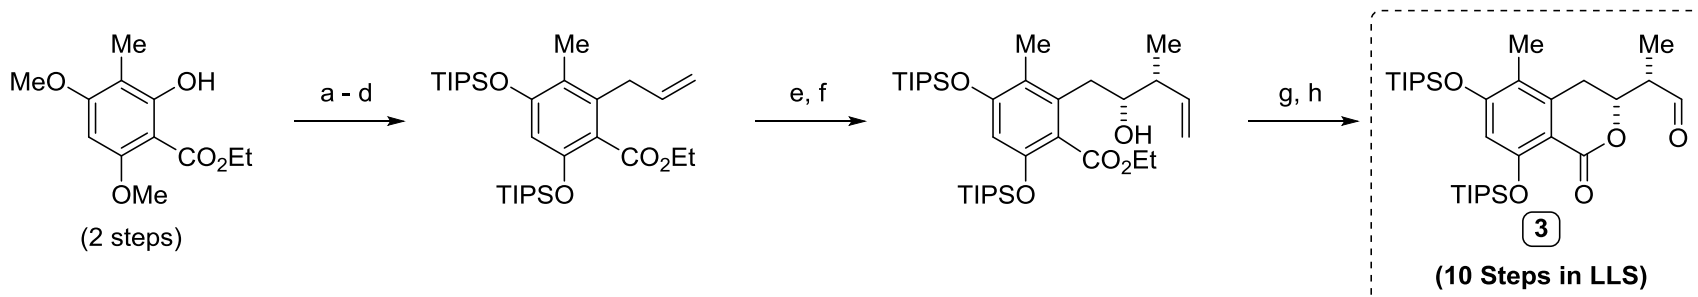

Key: a) Tf<sub>2</sub>O, pyridine; b) Pd(PPh<sub>3</sub>)<sub>4</sub>, allylSnBu<sub>3</sub>, LiCl; c) BBr<sub>3</sub>; d) TIPSOTf, 2,6-lutidine; e) OsO<sub>4</sub>, NMO, then NaIO<sub>4</sub>; f) (Z)-2-butene, *n*-BuLi, KO<sup>t</sup>-Bu, (-)-(lpc)<sub>2</sub>BOMe, BF<sub>3</sub>·OEt<sub>2</sub>; g) Amberlyst 15; OsO<sub>4</sub>, NMO, then NaIO<sub>4</sub>.

B. Huang *et al. Org. Lett.* **2007**, *9*, 2597. (Cont'd)

### Fragment Union and End Game

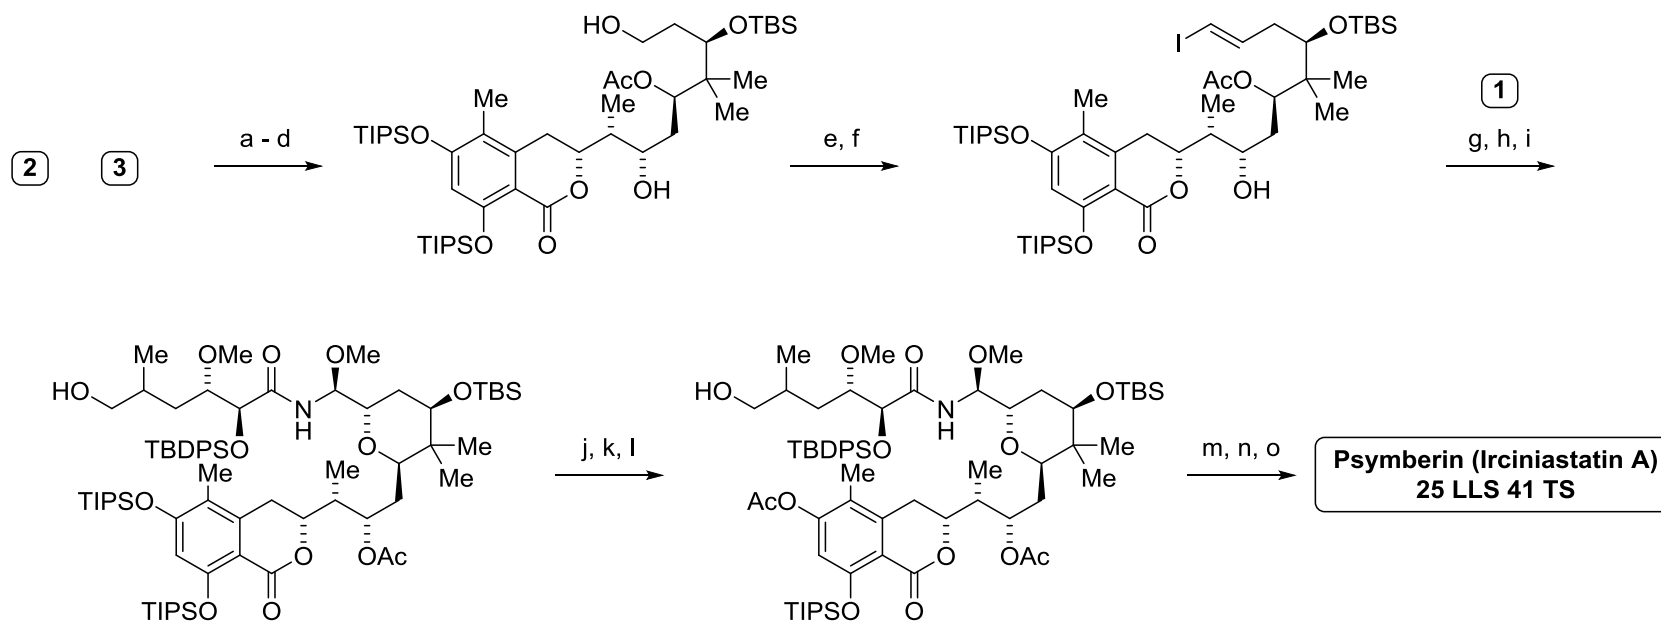

Key: a)  $\text{BF}_3\text{-OEt}_2$ ; b)  $\text{HB}(\text{cat})$ ; c)  $\text{Ac}_2\text{O}$ ; d)  $\text{H}_2$ ,  $\text{Pd/C}$ ; e)  $\text{DMP}$ ; f)  $\text{CrCl}_2$ ,  $\text{HCl}_3$ ; g) **1**,  $\text{CuI}$ ,  $\text{MeNH}(\text{CH}_2)_2\text{NHMe}$ ,  $\text{Cs}_2\text{CO}_3$ ; h)  $\text{NaOMe}$ ; i)  $\text{Ac}_2\text{O}$ , pyridine,  $\text{DMAP}$ ; j)  $\text{PhI}(\text{OAc})_2$ ,  $\text{MeOH}$ ,  $\text{HFIP}$ ; k)  $\text{Ac}_2\text{O}$ , pyridine,  $\text{DMAP}$ ; l)  $\text{H}_2$ ,  $\text{Pd/C}$ ; m)  $4\text{-NO}_2\text{-PhSeCN}$ ,  $\text{PBu}_3$ ; n)  $\text{H}_2\text{O}_2$ ; o)  $\text{TBAF}$ .

C. Crimmins *et al. Org. Lett.* **2009**, *11*, 3990.

### Fragment 1

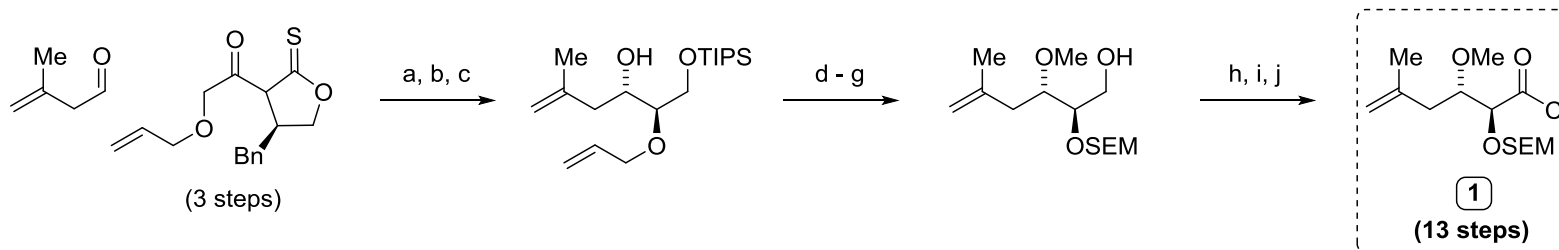

Key: a)  $\text{TiCl}_4$ , (-)-sparteine; b)  $\text{LiBH}_4$ ; c)  $\text{TIPSCl}$ , imidazole; d)  $\text{NaH}$ ,  $\text{MeI}$ ; e)  $\text{Ti}(\text{O}i\text{-Pr})_4$ ,  $n\text{-BuMgCl}$ ; f)  $\text{SEMCl}$ ,  $i\text{-PrNEt}_2$ ; g)  $\text{TBAF}$ ; h)  $\text{SO}_3\text{-pyr}$ ,  $\text{DMSO}$ ,  $i\text{-Pr}_2\text{NEt}$ ; i)  $\text{NaClO}_2$ ,  $\text{NaH}_2\text{PO}_4$ , 2-Me-2-butene; j)  $\text{SOCl}_2$ , pyridine.

### Fragment 2

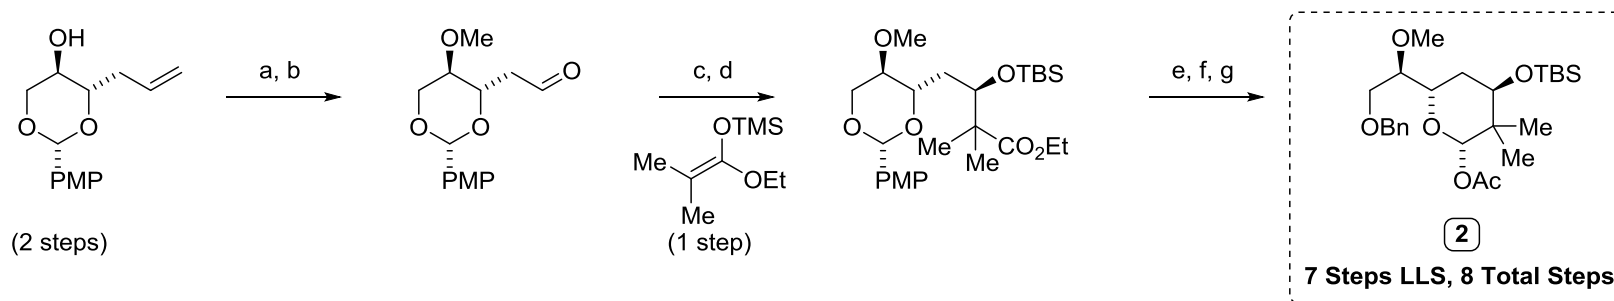

Key: a)  $\text{NaH}$ ,  $\text{MeI}$ ; b)  $\text{OsO}_4$ ,  $\text{NMO}$ , then  $\text{NaIO}_4$ ; c) enolate,  $\text{BH}_3$ ,  $\text{Ts-N-valine}$ ; d)  $\text{TBSOTf}$ , 2,6-lutidine; e)  $\text{HCl}$ , then  $\text{TFA}$ ; f)  $\text{NaH}$ ,  $\text{BnBr}$ ,  $\text{TBAI}$ ; g)  $\text{DIBAL-H}$ , then  $\text{Ac}_2\text{O}$ , pyridine,  $\text{DMAP}$ .

C. Crimmins *et al. Org. Lett.* **2009**, *11*, 3990. (Cont'd)

### Fragment 3

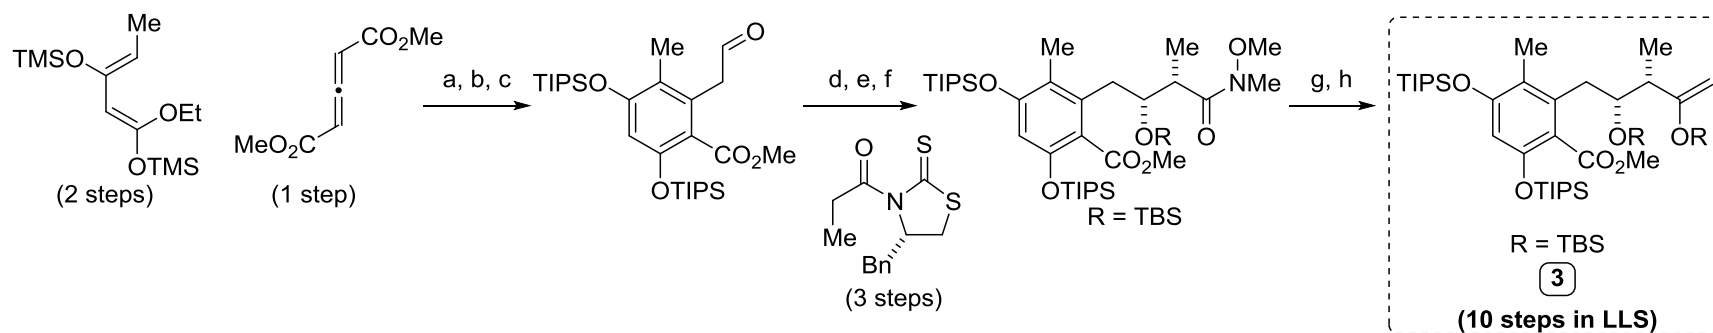

Key: a) neat, then Et<sub>3</sub>N-HF; b) TIPSOTf, 2,6-lutidine; c) DIBAL-H; d) auxiliary, TiCl<sub>4</sub>, (-)-sparteine, *N*-Me-pyrrolidine; e) (MeO)NHMe-HCl, imidazole; f) TBSOTf, 2,6-lutidine; g) MeMgBr; h) TBSOTf, *i*-Pr<sub>2</sub>NEt.

### Fragment Union and End Game

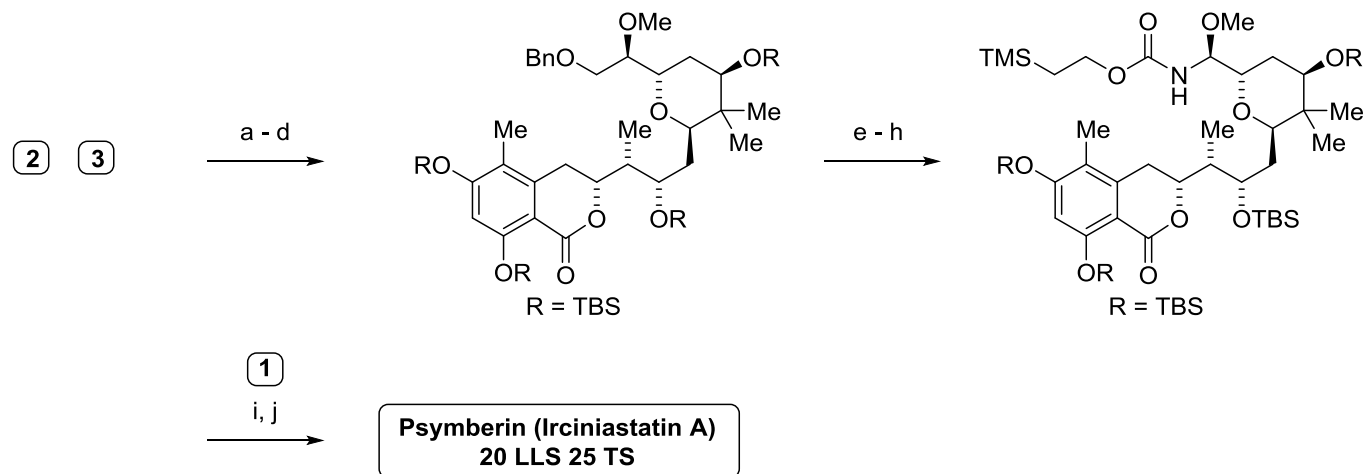

Key: a) BF<sub>3</sub>•Et<sub>2</sub>O; b) BH<sub>3</sub>•THF, (*R*)-4-Me-CBS; c) TBAF; d) TBSOTf, 2,6-lutidine; e) H<sub>2</sub>, Pd(OH)<sub>2</sub>/C; f) (COCl)<sub>2</sub>, DMSO, Et<sub>3</sub>N; g) NaClO<sub>2</sub>, 2-Me-2-butene; h) NaN<sub>3</sub>, Et<sub>3</sub>N, EtO<sub>2</sub>CCl, then PhMe, reflux; then CuCl, TMS(CH<sub>2</sub>)<sub>2</sub>OH; i) **1**, *i*-PrMgCl; j) TASF.



D. Floreancig *et. al.* *J. Am. Chem. Soc.* **2011**, *133*, 16668.

### Fragment 1

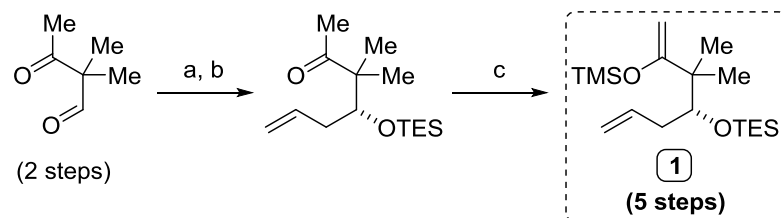

Key: a)  $[\text{Ir}(\text{cod})\text{Cl}]_2$ , *i*-PrOH,  $\text{Cs}_2\text{CO}_3$ , (*R*)-Cl<sub>2</sub>MeO-BIPHEP, *m*-NO<sub>2</sub>BzOH; b) TESCl, Imidazole; c) LDA, TMSCl.

### Fragment 2

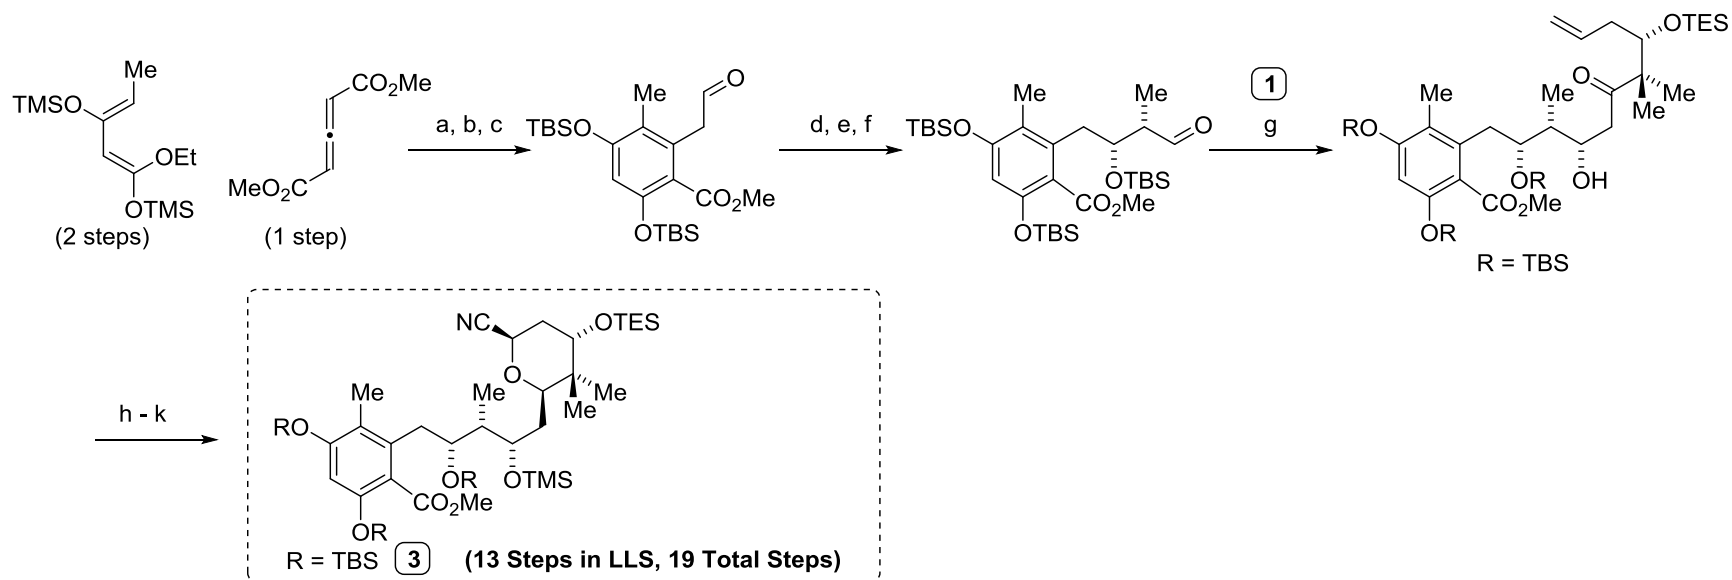

Key: a) neat, then Et<sub>3</sub>N-HF; b) TBSOTf, 2,6-lutidine; c) DIBAL-H; d) (*Z*)-Ipc<sub>2</sub>NCH<sub>2</sub>CH=CHMe; e) TBSOTf, 2,6-lutidine; f) O<sub>3</sub>, then PPh<sub>3</sub>; g) **1**, BF<sub>3</sub>-OEt<sub>2</sub>; h) NaBH<sub>4</sub>, Et<sub>2</sub>BOMe; i) O<sub>3</sub>, then PPh<sub>3</sub>; j) Ac<sub>2</sub>O, Et<sub>3</sub>N, DMAP, then TMSCl; k) TMSCN, TMSOTf.

D. Floreancig *et. al. J. Am. Chem. Soc.* **2011**, *133*, 16668. (Cont'd)

### Fragment Union and End Game

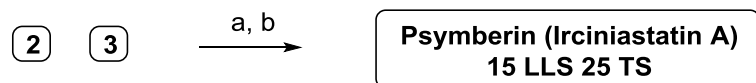

Key: a)  $\text{Cp}_2\text{Zr(H)Cl}$ , then **2**, then  $\text{Zn(OTf)}_2$ ,  $(\text{MeO})_3\text{CH}$ ; b) TBAF.

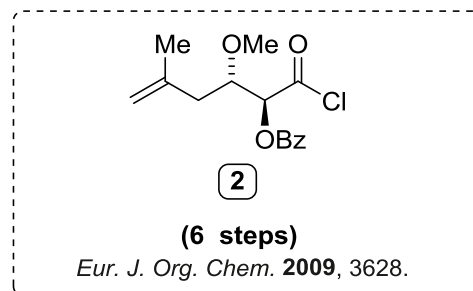

E. Hong *et al. Org. Lett.* **2011**, *13*, 5816.

### Fragment 1

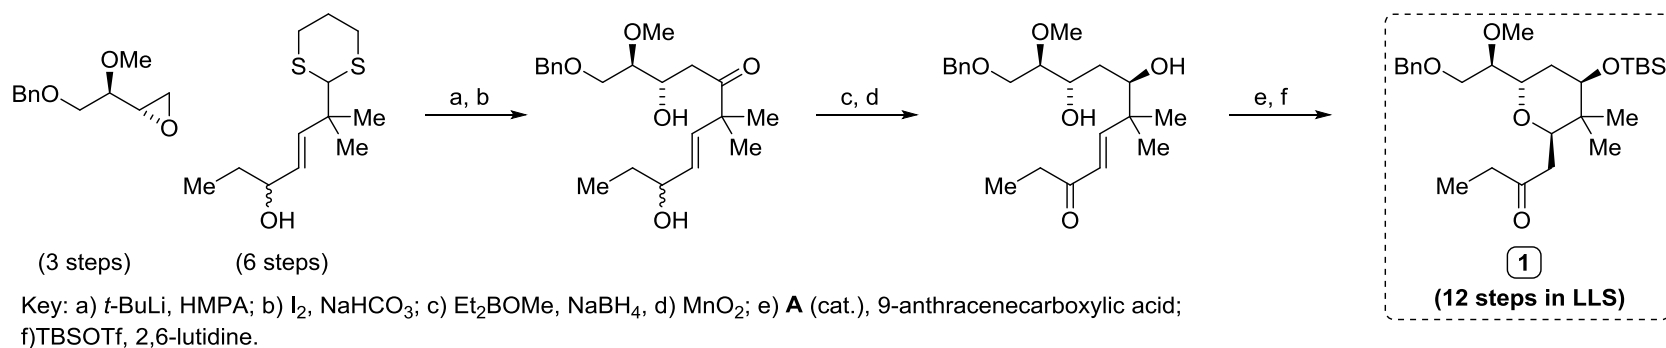

### Fragment 2

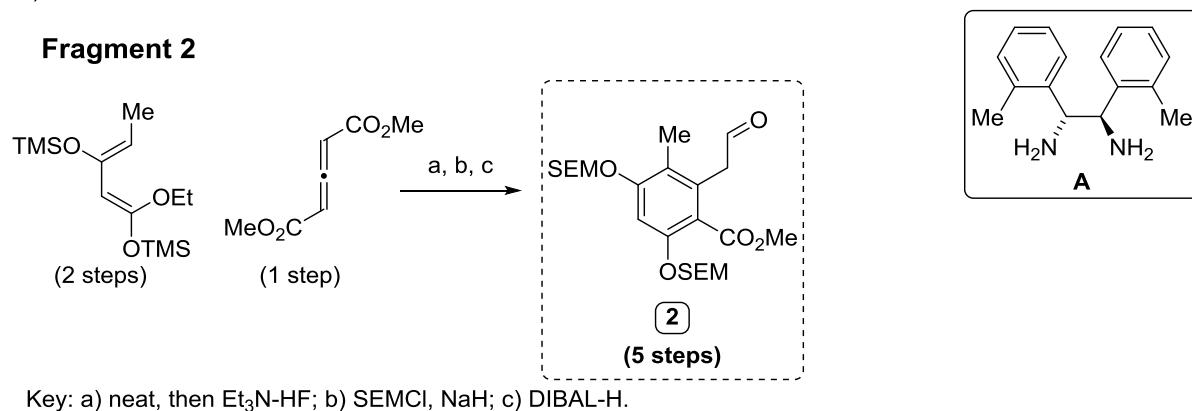

### Fragment 3

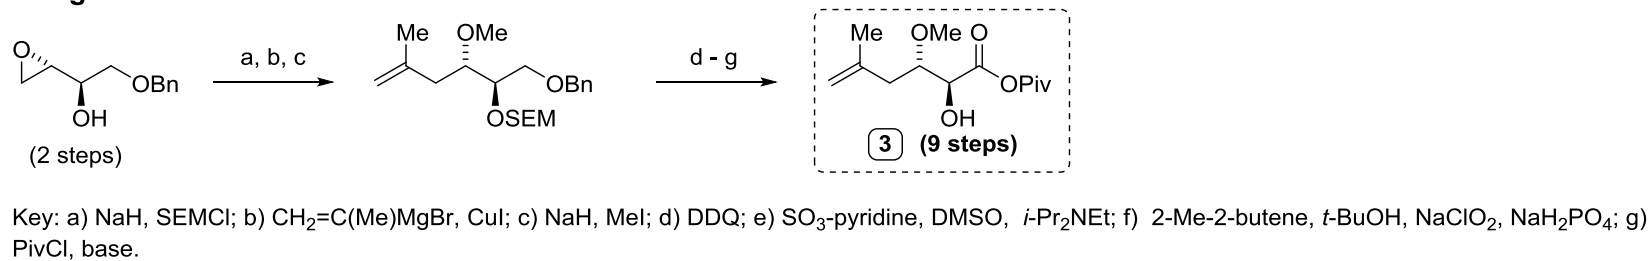

E. Hong *et al. Org. Lett.* **2011**, *13*, 5816. (Cont'd)

### Fragment 4

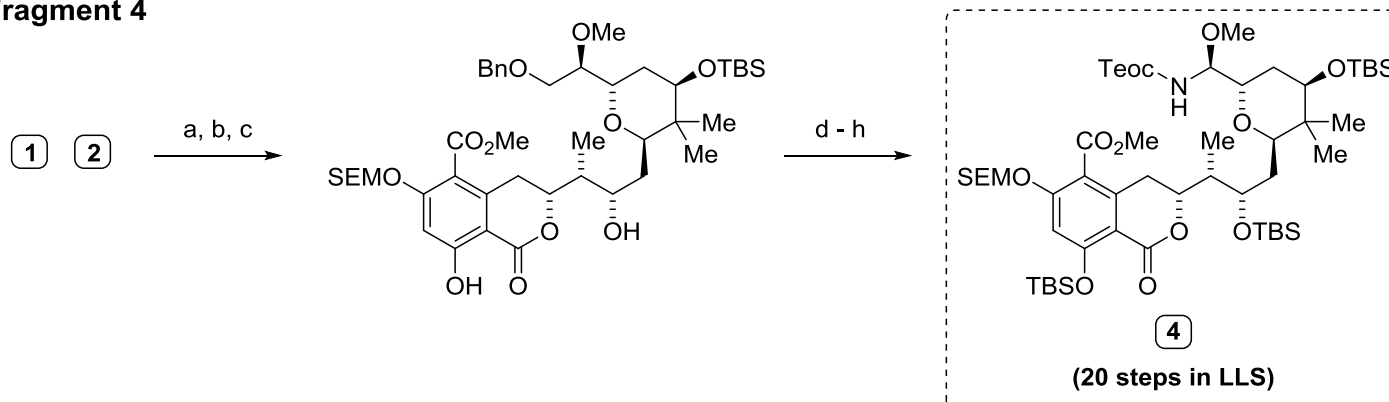

Key: a)  $\text{PhBCl}_2$ , *i*- $\text{Pr}_2\text{NEt}$ , then **2**; b)  $\text{Et}_2\text{BOMe}$ ,  $\text{NaBH}_4$ ; c) CSA; d) TBSOTf, 2,6-lutidine; e)  $\text{H}_2$ , Pd/C; f) DMP; g) 2-Me-2-butene, *t*-BuOH,  $\text{NaClO}_2$ ; h)  $\text{Et}_3\text{N}$ ,  $\text{EtO}_2\text{CCl}$ , then  $\text{NaN}_3$ , then PhMe, 110 °C; then  $\text{TMSCH}_2\text{CH}_2\text{OH}$ .

### Fragment Union and End Game

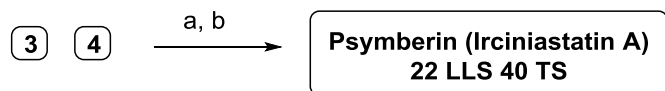

Key: a) LiHMDS, the **3**; b) TASF.

F. Smith *et al.* *Org. Lett.* **2008**, *10*, 5625; *J. Org. Chem.* **2013**, *78*, 4278.

### Fragment 1

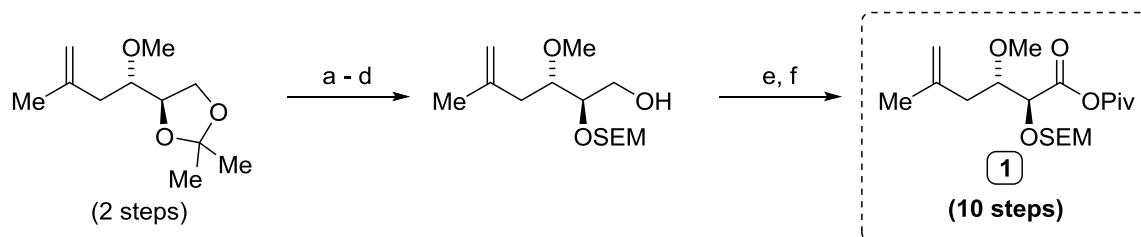

Key: a) HCl; b) PivCl, pyridine; c) SEMCl, *i*-Pr<sub>2</sub>NEt; d) DIBAL-H; e) SO<sub>3</sub>-pyridine, DMSO, *i*-Pr<sub>2</sub>NEt; f) NaClO<sub>2</sub>, NaH<sub>2</sub>PO<sub>4</sub>, 2-Me-2-butene, *t*-BuOH; g) PivCl, base.

### Fragment 2

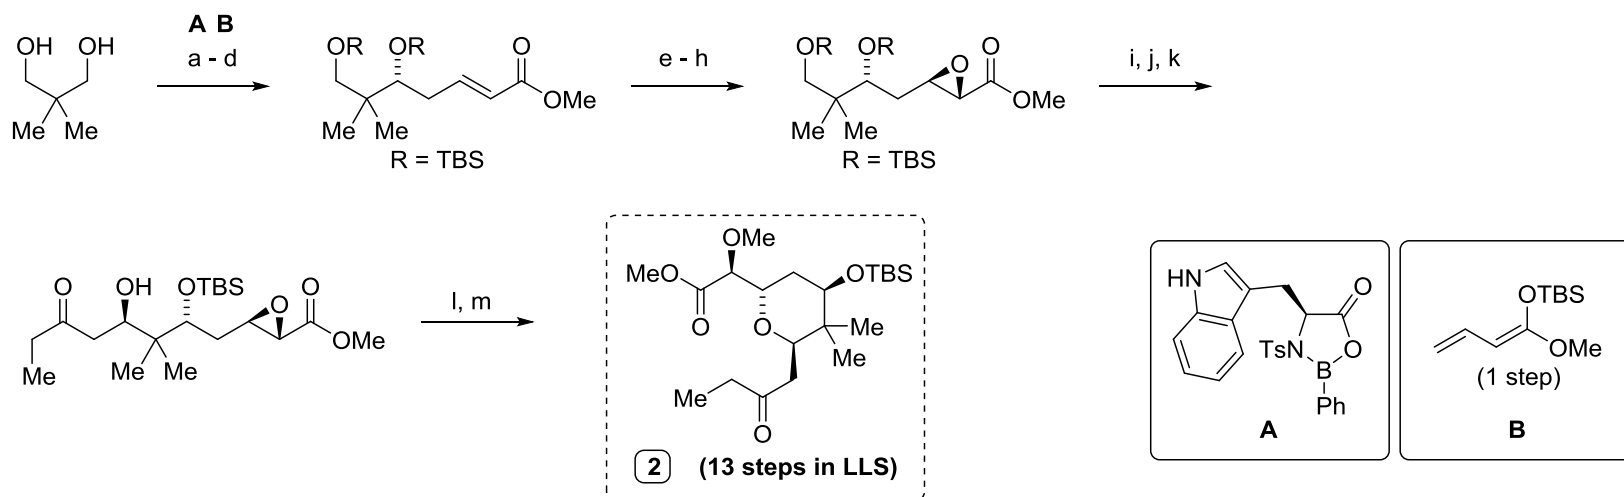

Key: a) NaH, TBSCl; b) SO<sub>3</sub>-pyridine, DMSO, *i*-Pr<sub>2</sub>NEt, DMSO; c) **A**, **B**, *n*-butyronitrile, *i*-PrOH; d) TBSOTf, 2,6-lutidine; e) DIBAL-H; f) (–)-DIPT, Ti(O-*i*-Pr)<sub>4</sub>, TBHP, 4Å MS; g) TEMPO, NaClO<sub>2</sub>, NaOCl, pH 7 buffer; h) TMSCHN<sub>2</sub>; i) HF-pyr; j) SO<sub>3</sub>-pyridine, DMSO, NEt<sub>3</sub>, DMSO; k) 2-butanone, (–)-DIPCl, NEt<sub>3</sub>; l) CSA; m) Me<sub>3</sub>O-BF<sub>4</sub>, proton sponge.

F. Smith *et al.* *Org. Lett.* **2008**, *10*, 5625; *J. Org. Chem.* **2013**, *78*, 4278. (Cont'd)

### Fragment 3

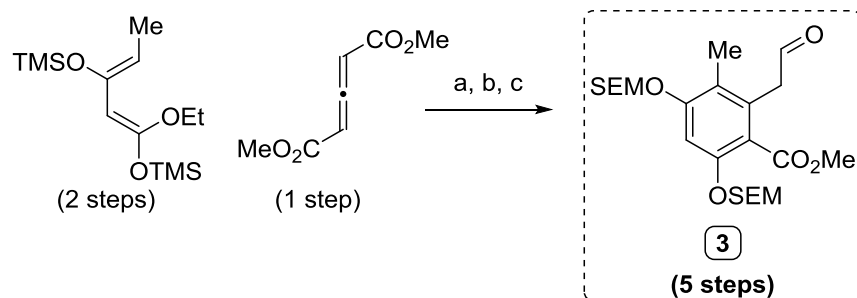

Key: a) neat, then Et<sub>3</sub>N-HF; b) SEMCl, NaH; c) DIBAL-H.

### Fragment 4

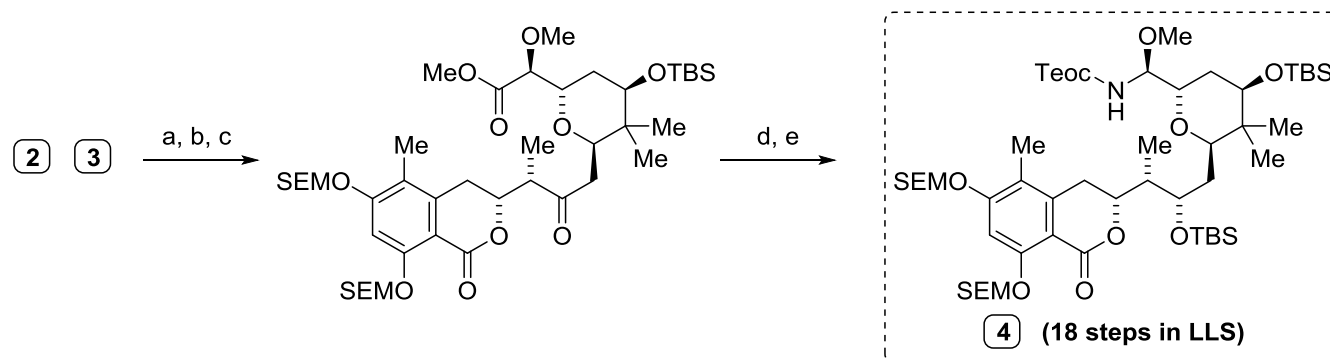

Key: a) Cl<sub>2</sub>BPh, *i*-Pr<sub>2</sub>NEt; b) Et<sub>2</sub>BOMe, NaBH<sub>4</sub>; c) LiOH, H<sub>2</sub>O; d) *i*-Pr<sub>2</sub>NEt, *i*-BuO<sub>2</sub>CCl, then NaN<sub>3</sub>, then PhMe, 80 °C; then TMSCH<sub>2</sub>CH<sub>2</sub>OH; e) TBSOTf, 2,6-lutidine.

### Fragment Union and End Game

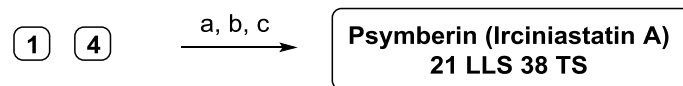

Key: a) LiHMDS, then 1; b) TASF; c) MgBr<sub>2</sub>, MeNO<sub>2</sub>.

G. Iwabuchi *et al. Org. Lett.* **2010**, *12*, 1040; *J. Org. Chem.* **2015**, *80*, 12333.

### Fragment 1

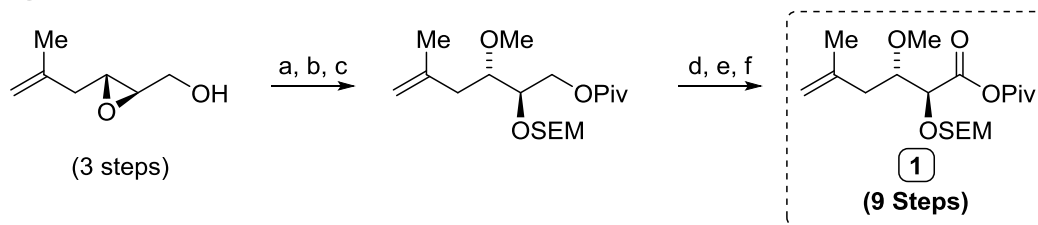

Key: a)  $\text{Eu}(\text{OTf})_3$  (cat.), 2,6-(*t*-Bu)<sub>2</sub>-4-Me-pyridine (cat.); b) PivCl, pyridine; c) SEMCl, *i*-Pr<sub>2</sub>NEt; d) DIBAL-H; e) 1-Me-AZADO,  $\text{PhI}(\text{OAc})_2$ ; f) PivCl, base.

### Fragment 2

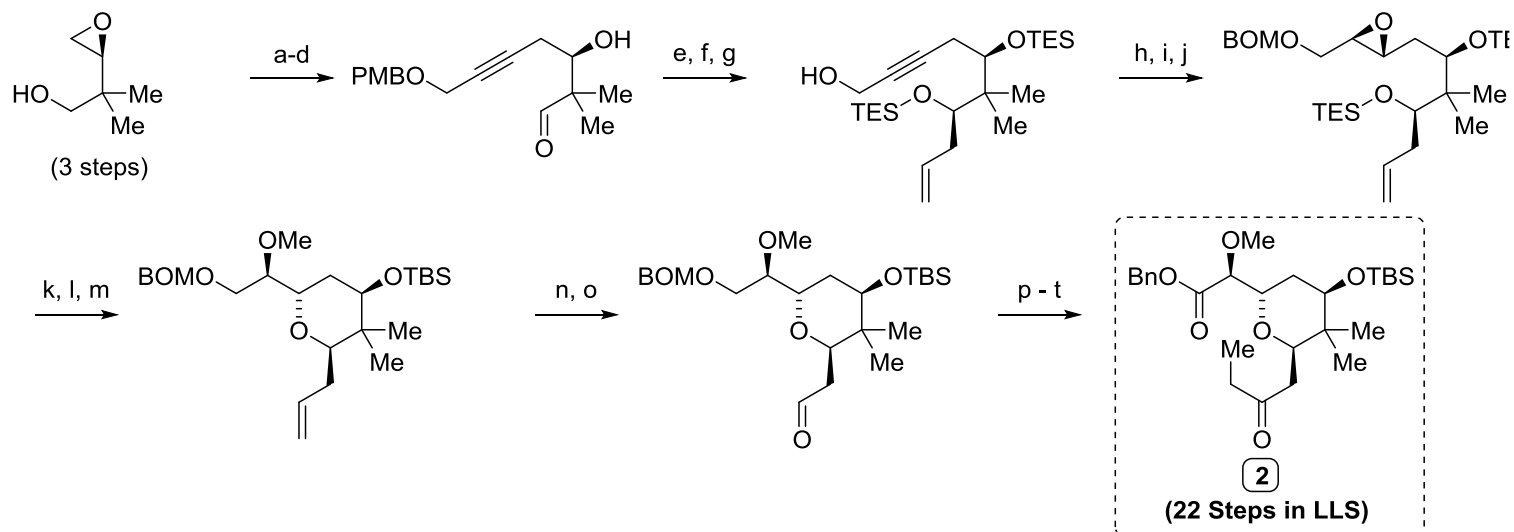

Key: a) DHP, PPTS; b)  $\text{HCCCH}_2\text{OPMB}$ , *n*-BuLi,  $\text{BF}_3\text{-OEt}_2$ ; c) PPTS; d) TEMPO,  $\text{PhI}(\text{OAc})_2$ ; e)  $\text{allylSn}(\text{Bu})_2$ ,  $\text{MgBr}_2\text{-OEt}_2$ ; f) TESCl, imidazole; DDQ; h) Red-Al; i) (-)-DET,  $\text{Ti}(\text{O-}i\text{-Pr})_4$ , TBHP, 4 Å MS; j) BOMCl, *i*-Pr<sub>2</sub>NEt; k) CSA; l) NaH,  $\text{Me}_2\text{SO}_4$ ; m) TBSOTf, 2,6-lutidine; n)  $\text{OsO}_4$ , NMO,

G. Iwabuchi *et al. Org. Lett.* **2010**, *12*, 1040; *J. Org. Chem.* **2015**, *80*, 12333. (Cont'd)

### Fragment Union and End Game

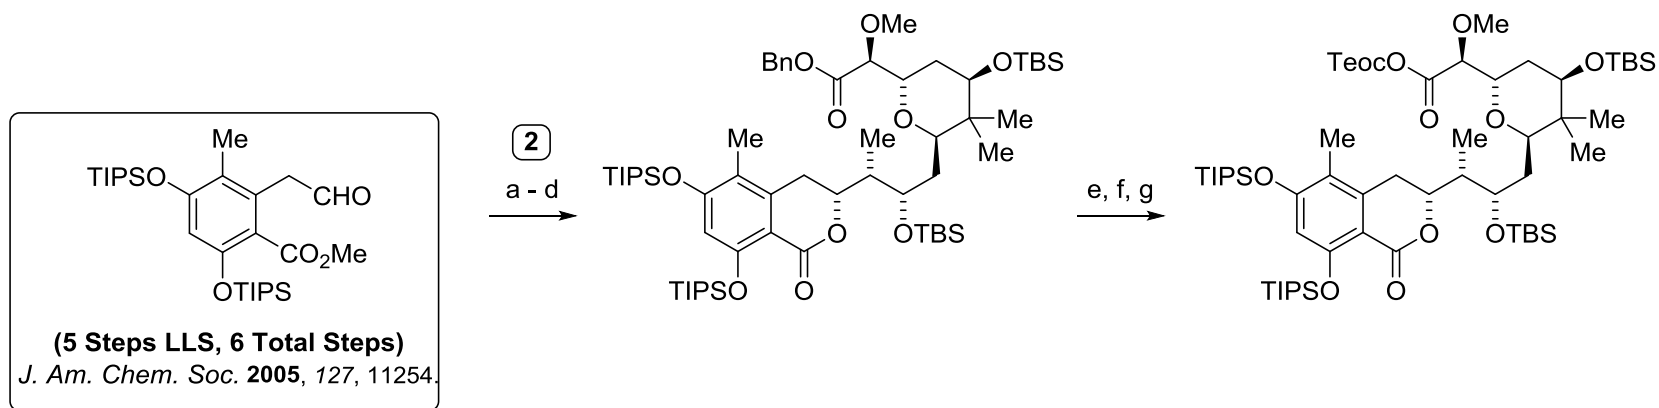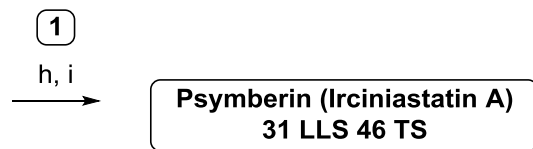

Key: a)  $\text{PhBCl}_2$ , *i*- $\text{Pr}_2\text{NEt}$ ; b)  $\text{NaBH}_4$ ,  $\text{Et}_3\text{B}$ ; c) CSA; d) TBSOTf, 2,6-lutidine; e)  $\text{H}_2$ , Pd/C; f)  $\text{EtO}_2\text{CCl}$ , NMM, then  $\text{NaN}_3$ ; g)  $\text{TMS}(\text{CH}_2)_2\text{OH}$ ; h) **1**, LiMHDS, 4 Å MS; i) TASF.



H. Williams *et al. Org. Lett.* **2007**, *9*, 1093.

### Fragment 1 and Reagents

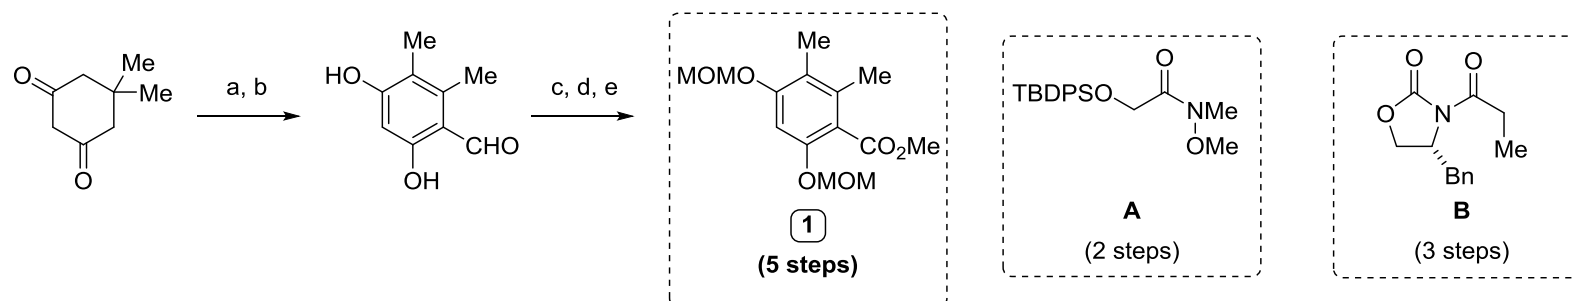

Key: a)  $(\text{CF}_3\text{CO})_2\text{O}$ ,  $\text{H}_2\text{SO}_4$ ; b)  $\text{Zn}(\text{CN})_2$ ,  $\text{HCl}$ ; c)  $\text{MOMCl}$ ,  $i\text{-Pr}_2\text{NEt}$ ; d)  $\text{NaH}_2\text{PO}_4$ ,  $\text{NaClO}_2$ , 2-Me-2-butene; e)  $\text{DIAD}$ ,  $\text{PPh}_3$ .

### Fragment 2

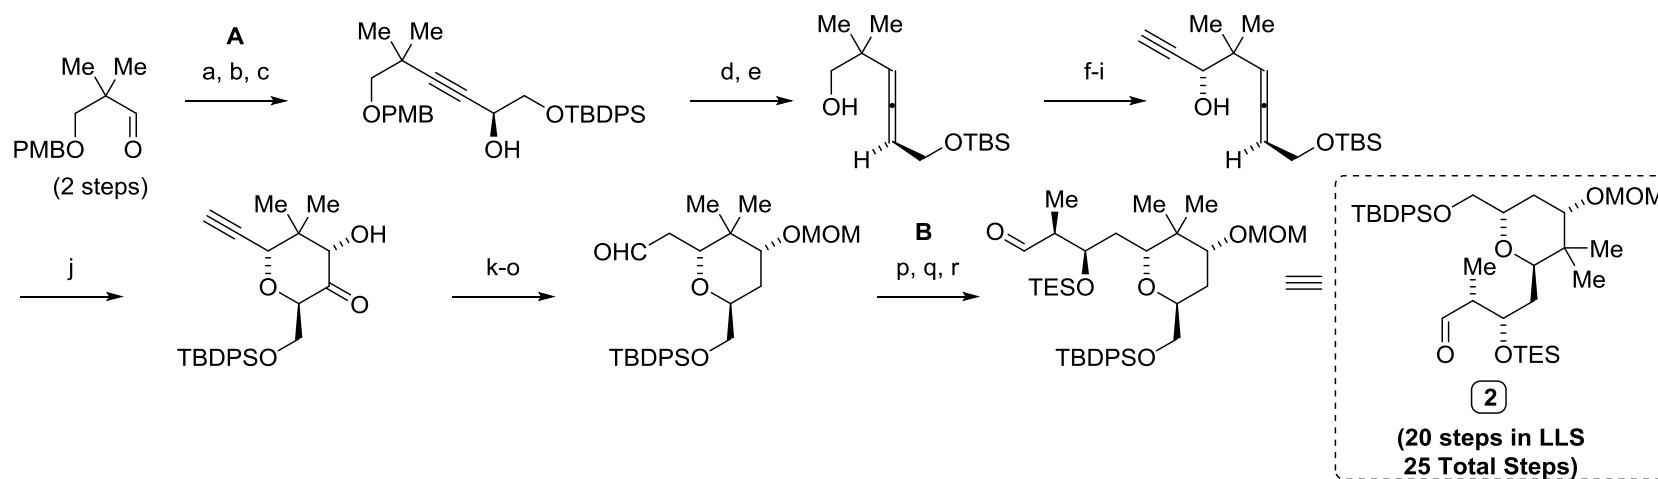

Key: a)  $\text{MeCOCH}_2\text{PO}(\text{OMe})_2$ ,  $\text{TsN}_3$ ,  $\text{K}_2\text{CO}_3$ ; b)  $n\text{-BuLi}$ , **2**; c) Noyori Catalyst,  $i\text{-PrOH}$ ; d)  $\text{PPh}_3$ ,  $\text{DIAD}$ , 2- $\text{NO}_2\text{-PhSO}_2\text{NHNH}_2$ ; e)  $\text{DDQ}$ ; f)  $\text{DMP}$ ; g)  $\text{HCCMgBr}$ ; h)  $\text{DMP}$ ; i) ( $S$ )- $\text{CBS}$ ,  $\text{BH}_3\text{-SMe}_2$ ; j)  $\text{DMDO}$ , then  $\text{MeOH}$ ; k)  $\text{Me}_4\text{NBH}(\text{OAc})_3$ ; l)  $\text{NaH}$ ,  $\text{TsCl}$ ; m)  $\text{DIBAL-H}$ ; n)  $\text{MOMCl}$ ,  $i\text{-Pr}_2\text{NEt}$ ; o)  $\text{BH}_3\text{-THF}$ , 2-Me-2-butene; p)  $n\text{-Bu}_2\text{BOTf}$ ,  $\text{Et}_3\text{N}$ , **3**; q)  $\text{Me}_3\text{Al}$ ,  $\text{MeONHMe}$ ; r)  $\text{TESCl}$ ,  $\text{Imidazole}$ , then  $\text{DIBAL-H}$ .

H. Williams *et al. Org. Lett.* **2007**, *9*, 1093. (Cont'd)

### Fragment Union and End of Formal Synthesis

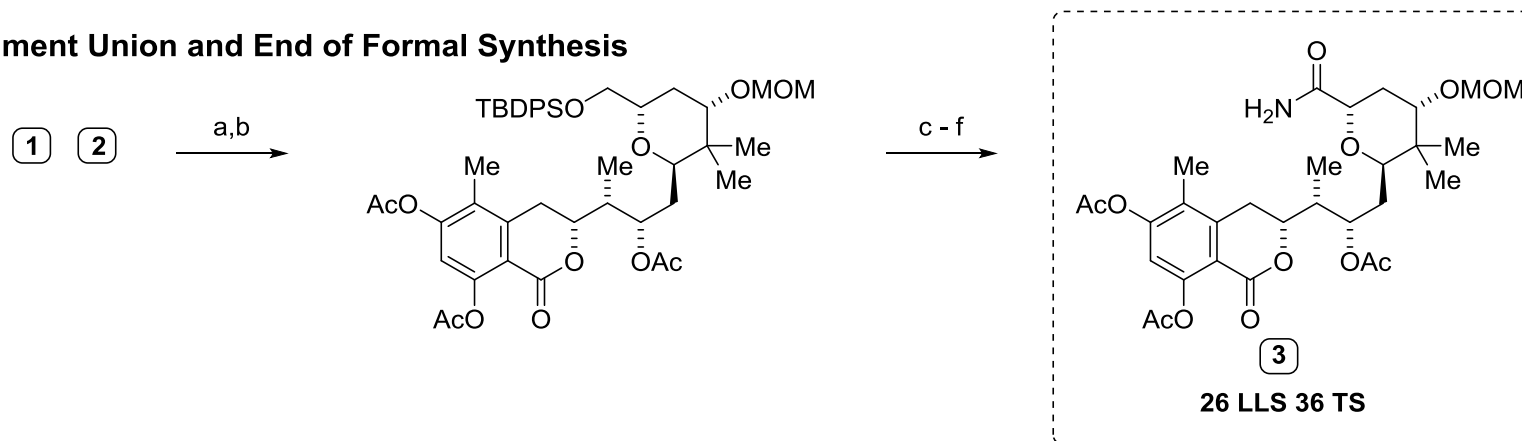

Key: a) BrB(cat); b) Ac<sub>2</sub>O, pyridine; c) HF-pyridine; d) DMP; e) NaH<sub>2</sub>PO<sub>4</sub>, NaClO<sub>2</sub>, 2-Me-2-butene; f) (COCl)<sub>2</sub>, then NH<sub>3</sub>.

### Formal Synthesis to Natural Product

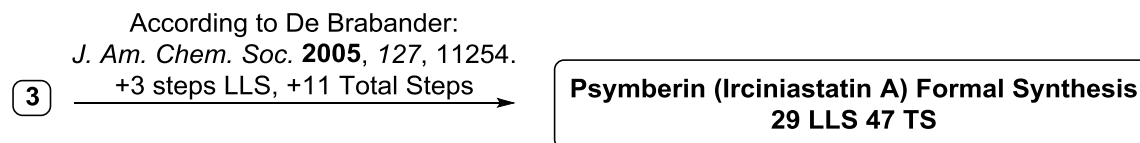

## Graphical Summary of Previous Syntheses of Neopeltolide

A. She *et al.* *Org. Lett.* **2011**, *13*, 5916.

### Fragment 1

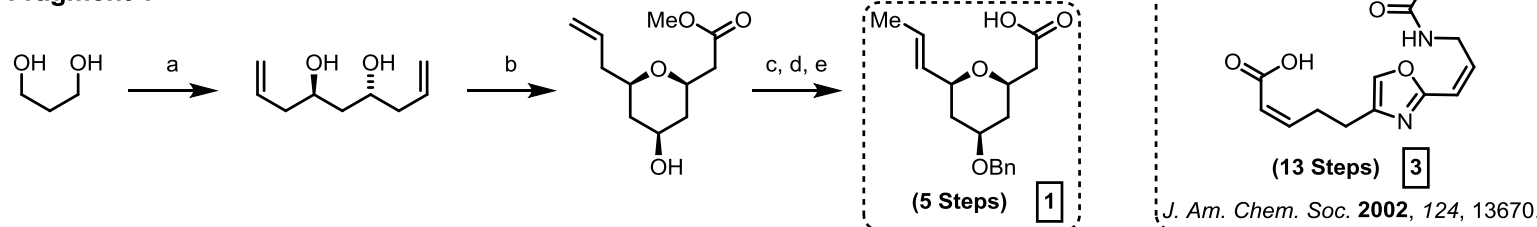

Key: (a) Allyl acetate,  $[\text{Ir}(\text{cod})\text{Cl}]_2$ , (*R*)-Cl,MeO-BIPHEP,  $\text{Cs}_2\text{CO}_3$ , 4-Cl-3- $\text{NO}_2$ -BzOH; (b)  $\text{PdCl}_2$ ,  $\text{CuCl}_2$ , CO; (c)  $\text{BnO}(\text{NH}=\text{C})\text{CCl}_3$ ,  $\text{MsOH}$ ; (d) Grubbs' II; (e)  $\text{LiOH}$ .

### Fragment 2

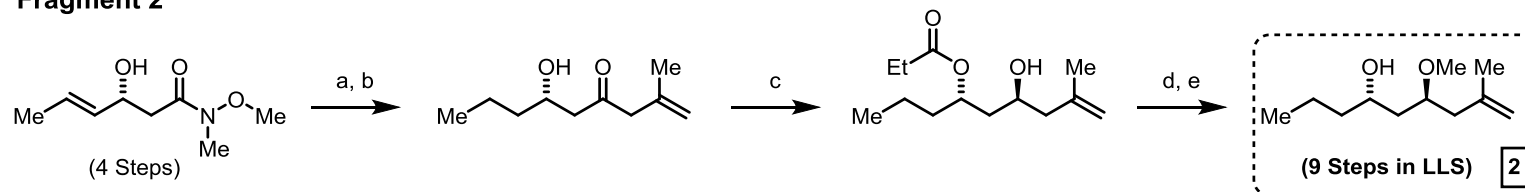

Key: (a) Raney-Ni,  $\text{H}_2$ ; (b) MethallylMgBr; (c)  $\text{SmI}_2$ ,  $\text{EtCHO}$ ; (d)  $\text{Me}_3\text{OBF}_4$ , proton sponge; (e)  $\text{K}_2\text{CO}_3$ ,  $\text{MeOH}$ .

### Fragment Union and End Game

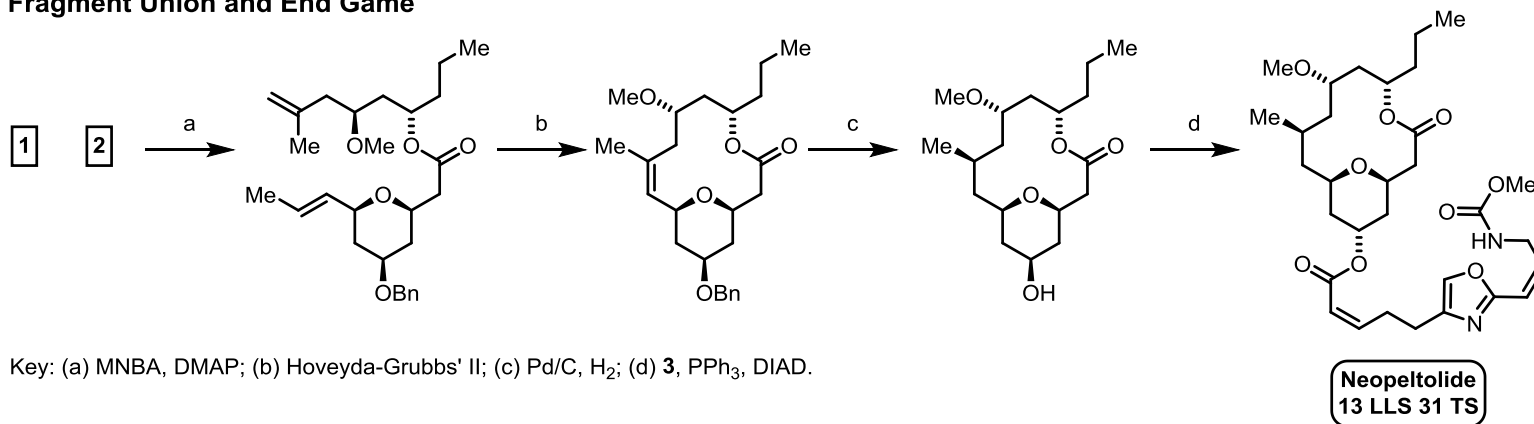

Key: (a) MNBA, DMAP; (b) Hoveyda-Grubbs' II; (c)  $\text{Pd/C}$ ,  $\text{H}_2$ ; (d) **3**,  $\text{PPh}_3$ , DIAD.

B. Panek *et al.* *Angew. Chem. Int. Ed.* **2007**, *46*, 9211.

### Fragment 1

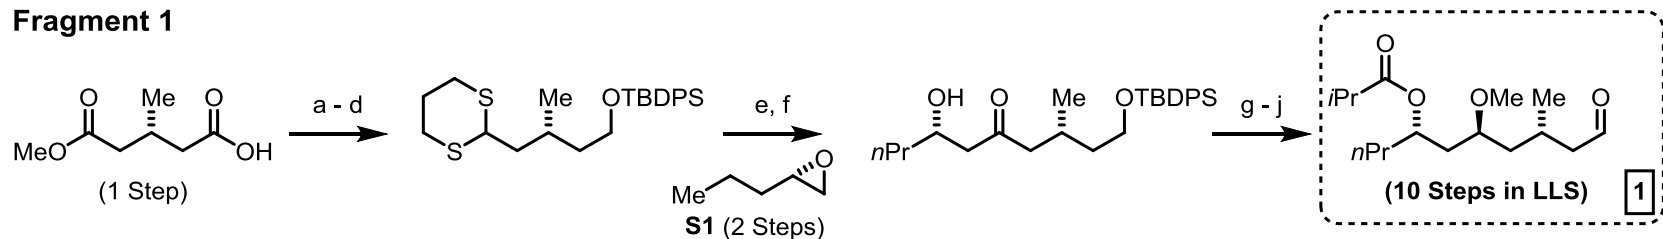

Key: (a)  $\text{BH}_3 \cdot \text{SMe}_2$ ; (b) TBDPSCI, imidazole; (c) DIBAL-H; (d)  $\text{HS}(\text{CH}_2)_4\text{SH}$ ,  $\text{I}_2$ ; (e)  $t\text{BuLi}$ , **S1**, HMPA; (f)  $\text{CaCO}_3$ , MeI; (g)  $\text{Zr}(\text{OtBu})_4$ ,  $i\text{PrCHO}$ ; (h)  $\text{Me}_3\text{OBF}_4$ , proton sponge, 4A MS; (i) 49%  $\text{HF}(\text{aq.})$ ; (j)  $(\text{COCl})_2$ , DMSO,  $\text{Et}_3\text{N}$ .

### Fragment Union and End Game

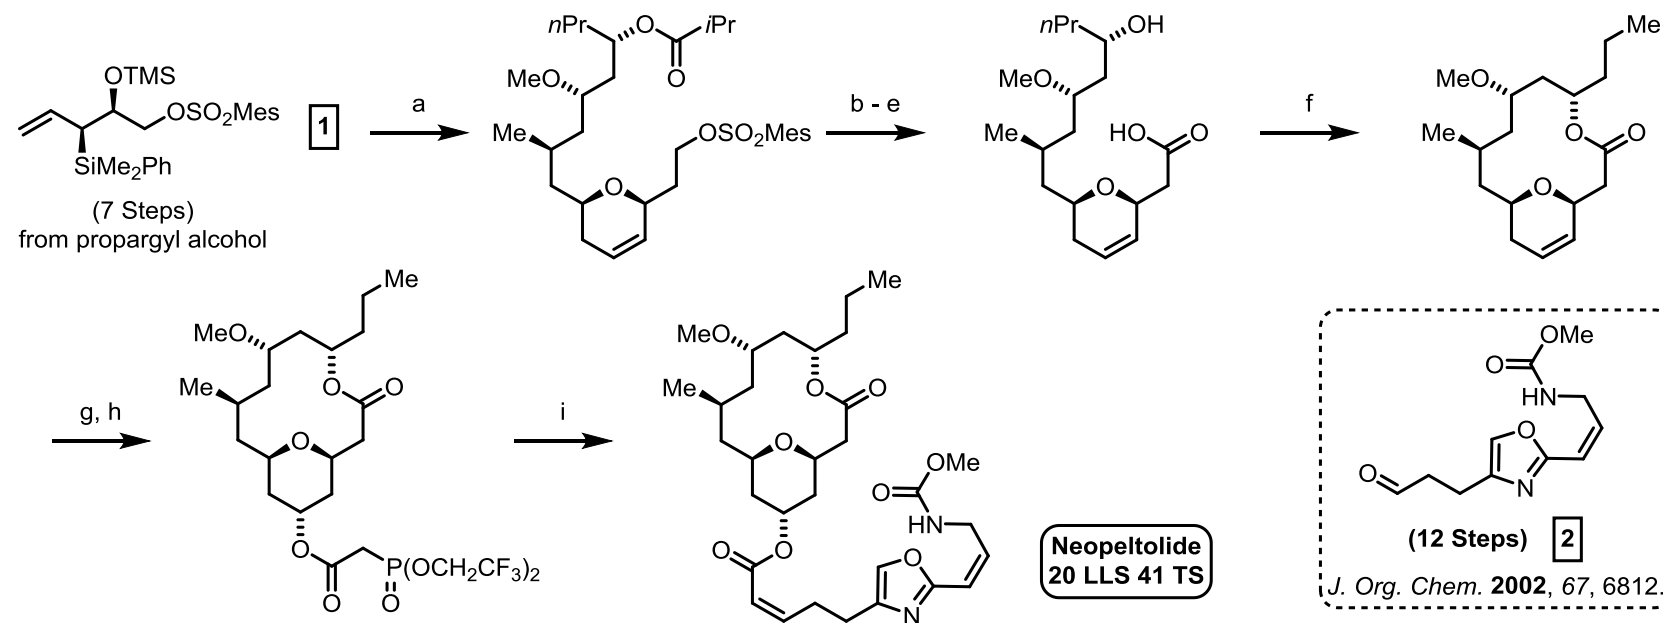

Key: (a) TfOH; (b) NaCN; (c) DIBAL-H,  $\text{Et}_2\text{O}$ ; (d) DIBAL-H, DCM; (e)  $\text{NaClO}_2$ , 2-methyl-2-butene,  $\text{NaH}_2\text{PO}_4 \cdot \text{H}_2\text{O}$ ; (f) TCBC, DMAP,  $\text{Et}_3\text{N}$ ; (g)  $\text{Hg}(\text{O}_2\text{CCF}_3)_2$ , then  $\text{NaBH}_4$ ; (h)  $(\text{CF}_3\text{CH}_2\text{O})_2\text{P}(\text{O})\text{CH}_2\text{CO}_2\text{H}$ , EDCI·HCl,  $\text{HOBT} \cdot \text{H}_2\text{O}$ ; (i) 18-Crown-6, KHMDS, then **2**.

C. Scheidt *et al.* *J. Am. Chem. Soc.* **2008**, *130*, 804.

### Fragment 1

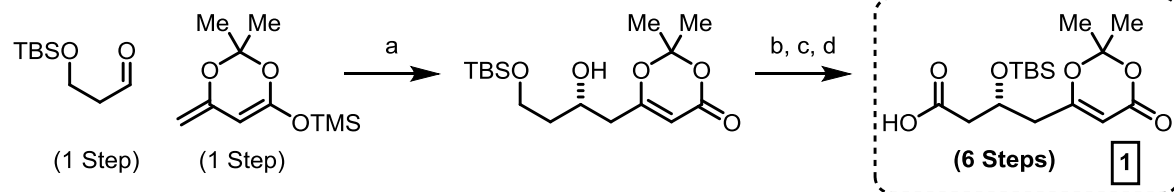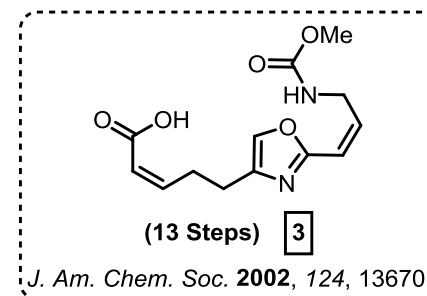

Key: (a)  $\text{Ti}(\text{O}i\text{Pr})_4$ , (*R*)-BINOL, 4A MS; (b) TBSOTf, 2,6-lutidine; (c) PPTS; (d) PDC.

### Fragment 2

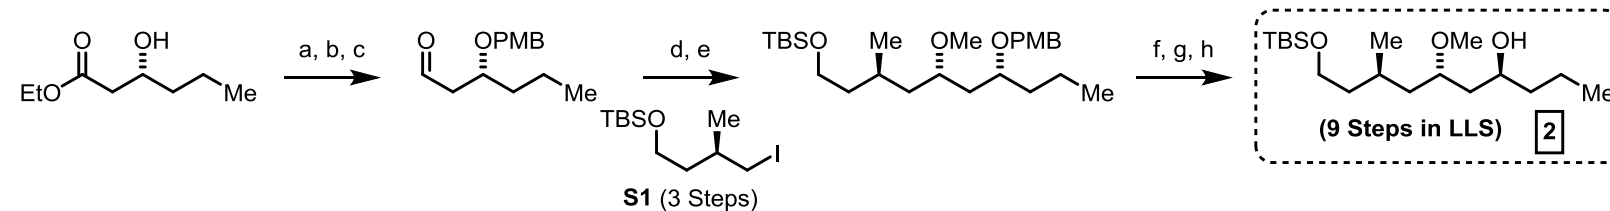

Key: (a)  $\text{MeNH}(\text{OMe})\cdot\text{HCl}$ , *i*PrMgBr; (b)  $\text{PMBO}(\text{NH}=\text{C})\text{CCl}_3$ , PPTS; (c) DIBAL-H; (d) *t*BuLi, **S1**; (e) MeOTf, DTBMP; (f) DDQ, pH 7 buffer; (g) 4-NO<sub>2</sub>-BzOH, PPh<sub>3</sub>, DEAD; (h) K<sub>2</sub>CO<sub>3</sub>, MeOH.

### Fragment Union and End Game

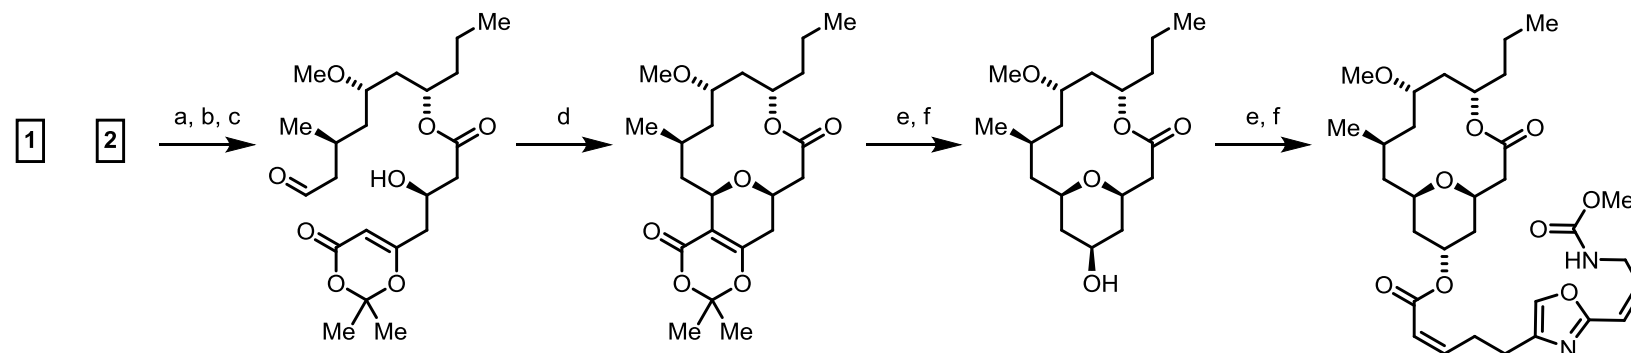

Key: (a) TCBC, DMAP; (b) HF·py; (c) TEMPO,  $\text{PhI}(\text{OAc})_2$ ; (d)  $\text{Sc}(\text{OTf})_3$ , CaSO<sub>4</sub>; (e) DMSO, H<sub>2</sub>O; (f) NaBH<sub>4</sub>; (g) **3**, PPh<sub>3</sub>, DIAD.

**Neopeltolide**  
16 LLS 38 TS

D. Lee *et al.* *Angew. Chem. Int. Ed.* **2008**, *47*, 3242.

### Fragment 1

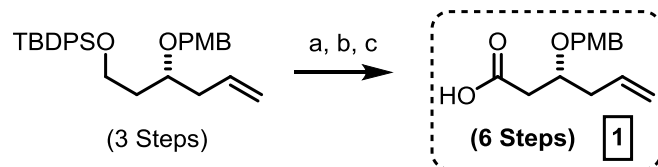

Key: (a) TBAF; (b) DMP; (c) NaClO<sub>2</sub>, NaH<sub>2</sub>PO<sub>4</sub>, 2-methyl-2-butene.

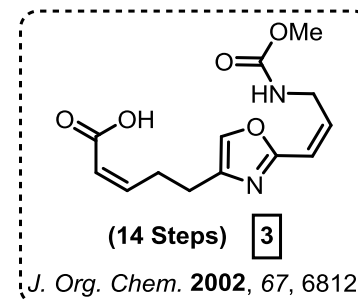

### Fragment 2

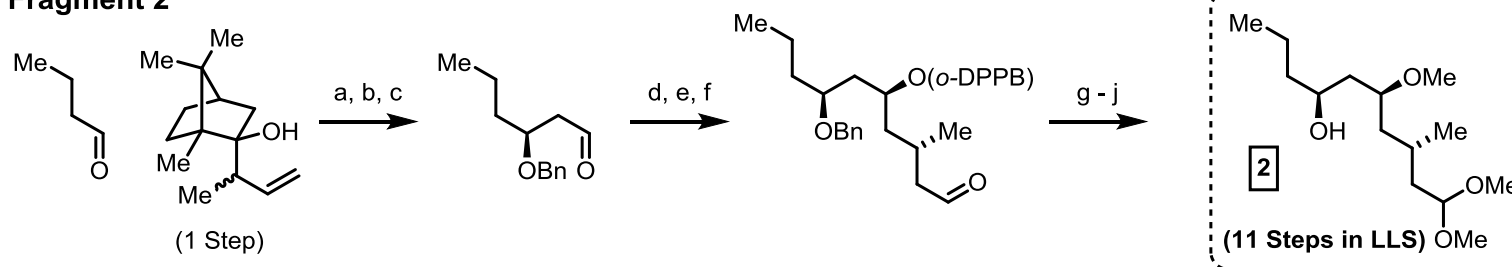

Key: (a) CSA; (b) NaH, BnBr, TBAI; (c) O<sub>3</sub>, then PPh<sub>3</sub>; (d) CH<sub>2</sub>=C(Me)CH<sub>2</sub>TMS, TiCl<sub>4</sub>; (e) 2-Ph<sub>2</sub>P-BzOH, DCC, DMAP; (f) Rh(CO)<sub>2</sub>(acac), P(OPh)<sub>3</sub>, H<sub>2</sub>/CO; (g) HC(OMe)<sub>3</sub>, H<sub>2</sub>SO<sub>4</sub>; (i) NaH, MeI; (j) H<sub>2</sub>, Pd/C.

### Fragment Union and End Game

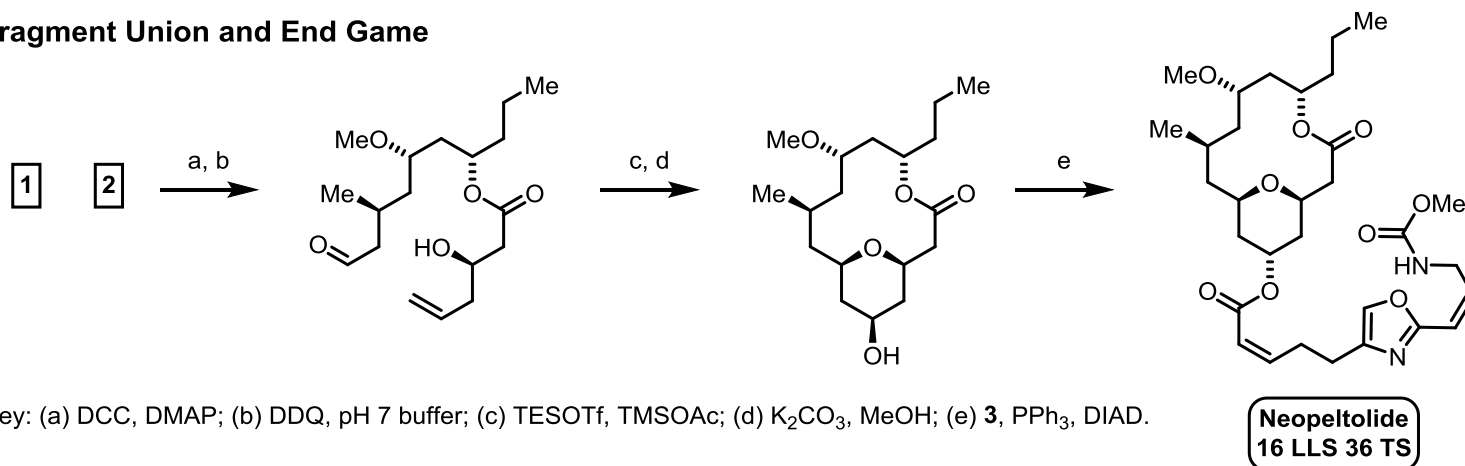

Key: (a) DCC, DMAP; (b) DDQ, pH 7 buffer; (c) TESOTf, TMSOAc; (d) K<sub>2</sub>CO<sub>3</sub>, MeOH; (e) **3**, PPh<sub>3</sub>, DIAD.

E. Paterson *et al. Chem. Commun.* **2008**, 4708.

### Fragment 1

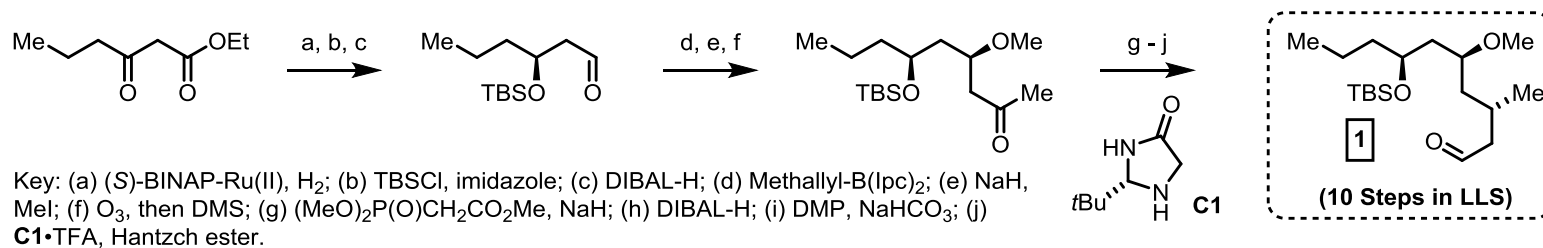

### Fragment 2

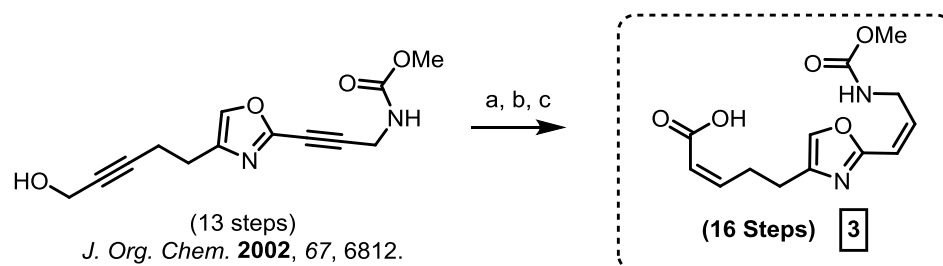

Key: (a) H<sub>2</sub>, Lindlar cat.; (b) DMP, NaHCO<sub>3</sub>; (c) NaClO<sub>2</sub>, NaH<sub>2</sub>PO<sub>4</sub>, 2-methyl-2-butene.

### Fragment Union and End Game

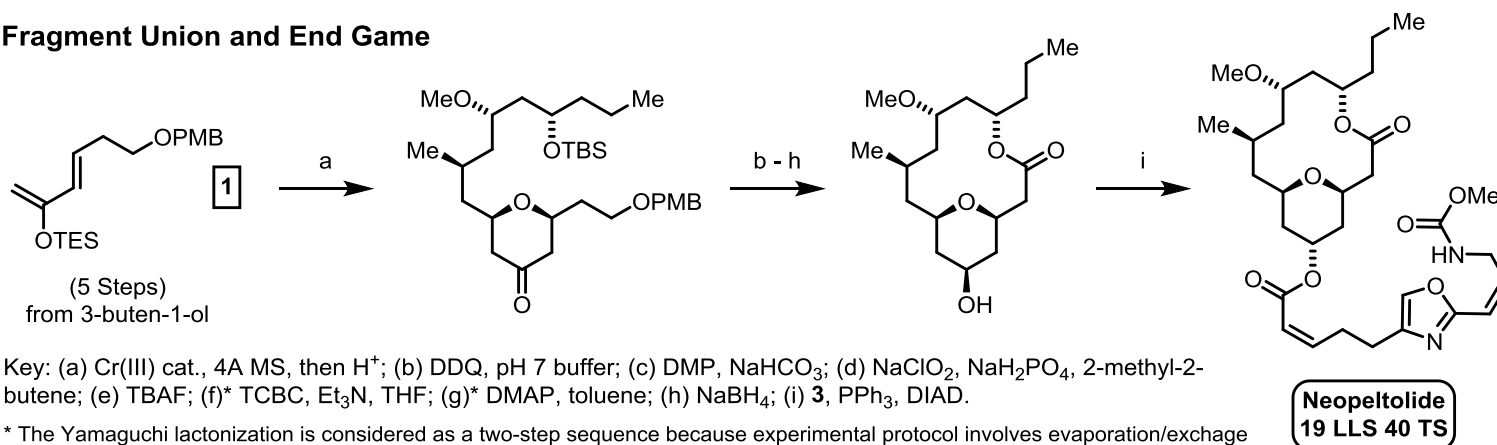

F. Maier *et al. Org. Lett.* **2008**, *10*, 1239.

### Fragment 1

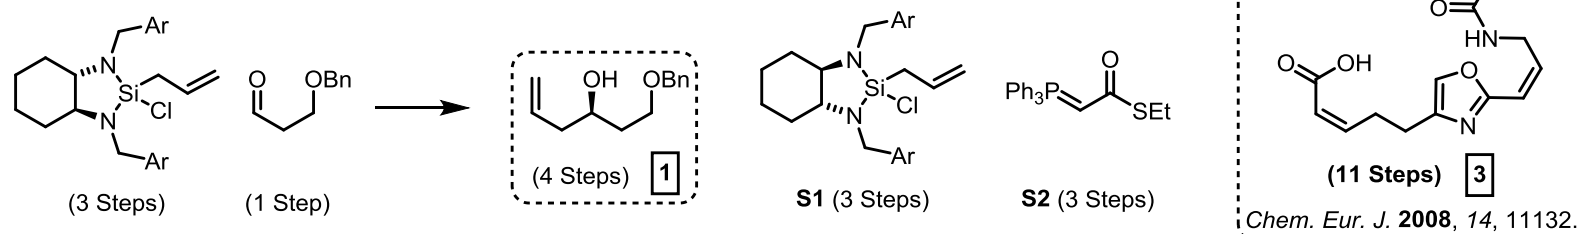

### Fragment 2

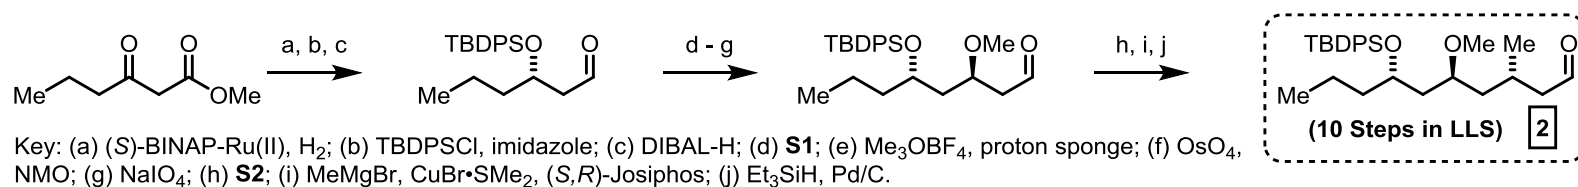

### Fragment Union and End Game

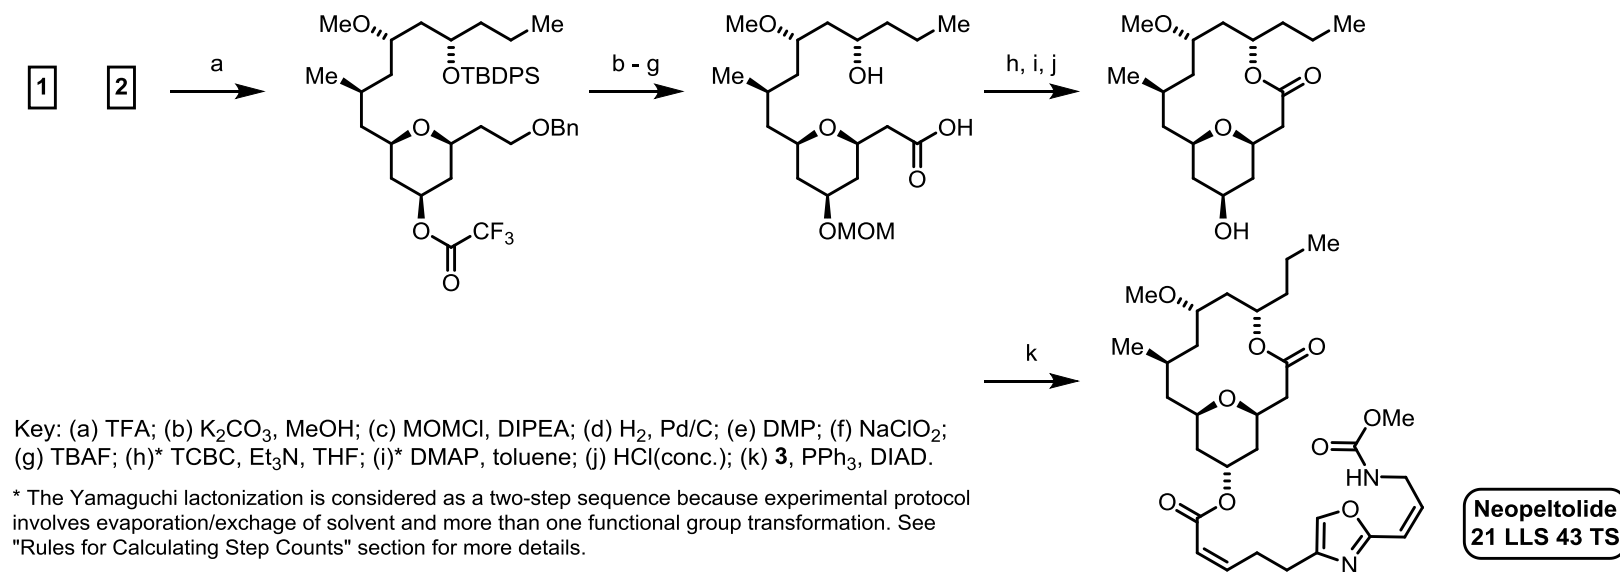



G. Taylor *et al.* *Org. Lett.* **2008**, *10*, 5047.

### Completion of Synthesis

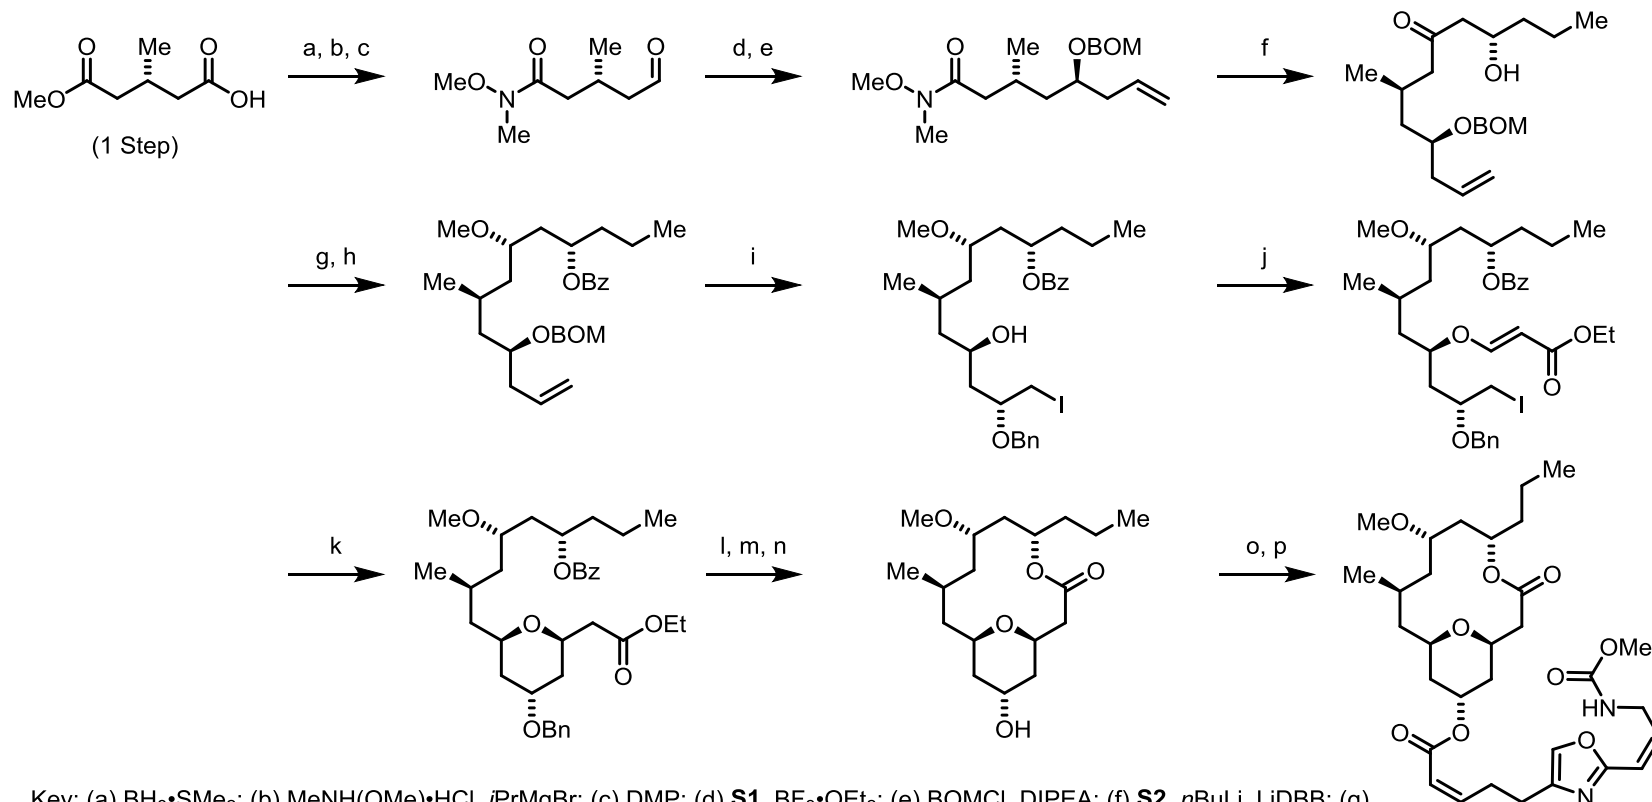

Key: (a)  $\text{BH}_3 \cdot \text{SMe}_2$ ; (b)  $\text{MeNH(OMe) \cdot HCl}$ ,  $i\text{PrMgBr}$ ; (c) DMP; (d) **S1**,  $\text{BF}_3 \cdot \text{OEt}_2$ ; (e) BOMCl, DIPEA; (f) **S2**,  $n\text{BuLi}$ , LiDBB; (g)  $\text{Sml}_2$ , PhCHO; (i)  $\text{Me}_3\text{OBF}_4$ , proton sponge; (j) ICl,  $\text{Na}_2\text{S}_2\text{O}_3(\text{aq.})$ ; (k) Ethyl propiolate,  $\text{PBu}_3$ ; (l) AIBN,  $n\text{Bu}_3\text{SnH}$ ; (m) KOH; (n) TCBC,  $\text{Et}_3\text{N}$ , DMAP; (o)  $\text{H}_2$ , Pd/C; (p)  $(\text{CF}_3\text{CH}_2\text{O})_2\text{P(O)CH}_2\text{CO}_2\text{H}$ , EDCI  $\cdot$  HCl, HOBT  $\cdot$   $\text{H}_2\text{O}$ ; (p) 18-Crown-6, KHMDs, then **1**.

**Neopeltolide**  
**17 LLS 34 TS**

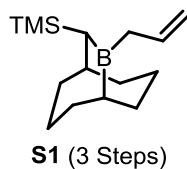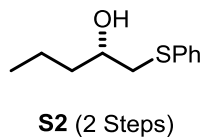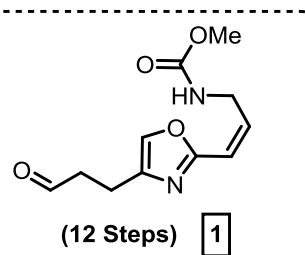

H. Kozmin *et al. Nat. Chem. Biol.* **2008**, *4*, 418. (racemic)

### Fragment 1

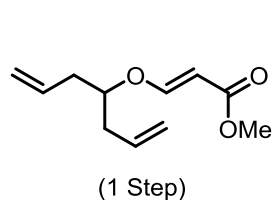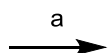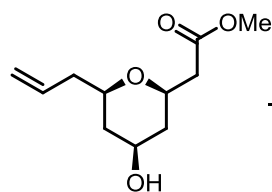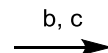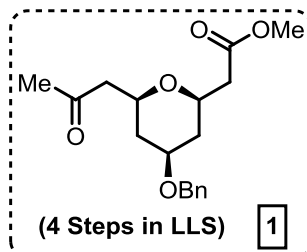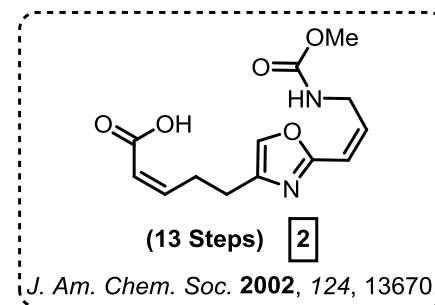

Key: (a) TFA, then  $\text{NH}_3 \cdot \text{H}_2\text{O}$ ; (b)  $\text{BnO}(\text{C}=\text{NH})\text{CCl}_3$ , TfOH; (c)  $\text{PdCl}_2$ , CuCl,  $\text{O}_2$ .

### Fragment Union and End Game

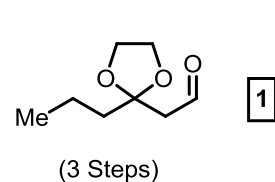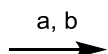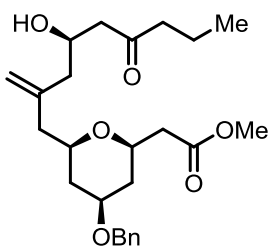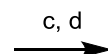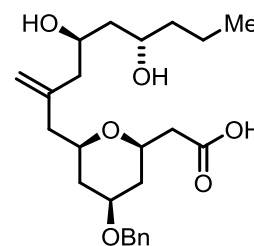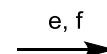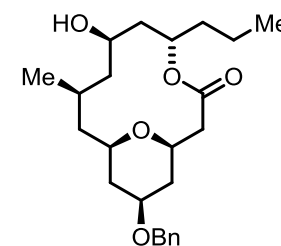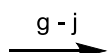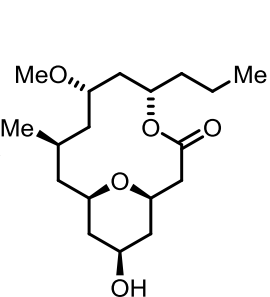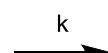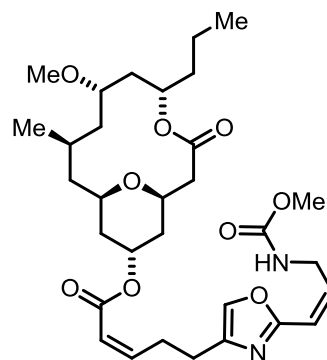

(±)-Neopeltolide  
15 LLS 31 TS

Key: (a)  $\text{Cy}_2\text{BCl}$ ,  $\text{Et}_3\text{N}$ ; (b)  $\text{Ph}_3\text{PMeBr}$ , KHMDS, then HCl; (c)  $\text{Et}_2\text{BOMe}$ ,  $\text{NaBH}_4$ ; (d) TMSOK; (e) TCBC,  $\text{Et}_3\text{N}$ , DMAP; (f)  $\text{H}_2$ , Pd/C; (g) 4- $\text{NO}_2$ -BzOH,  $\text{PPh}_3$ , DEAD; (h)  $\text{K}_2\text{CO}_3$ , MeOH; (i)  $\text{Me}_3\text{OBF}_4$ , proton sponge; (j)  $\text{H}_2$ ,  $\text{Pd}(\text{OH})_2$ ; (k) **2**,  $\text{PPh}_3$ , DIAD.

I. Roulland *et al. Org. Lett.* **2009**, *11*, 4700.

### Fragment 1

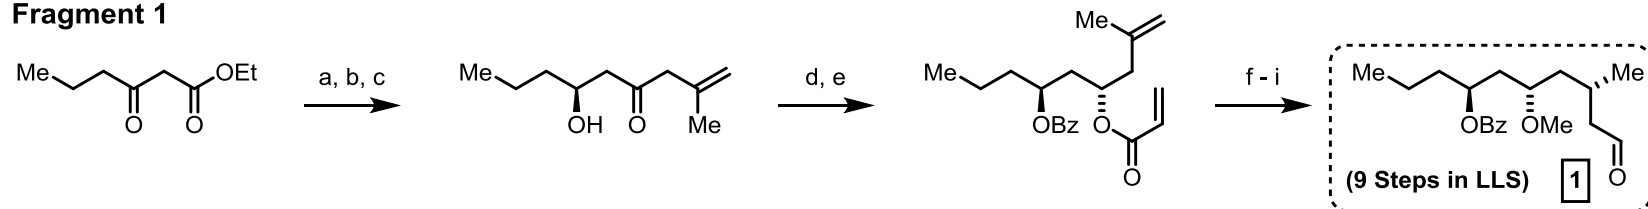

Key: (a) Ru(II) cat., (*R*)-SYNPHOS, H<sub>2</sub>; (b) MeNH(OMe)•HCl, AlMe<sub>3</sub>; (c) MethallylMgBr; (d) PhCHO, Sml<sub>2</sub>; (e) Acryloyl chloride, DIPEA; (f) Grubbs' II; (g) H<sub>2</sub>, Pd/C, then PPTS; (h) Me<sub>3</sub>OBF<sub>4</sub>, proton sponge; (i) DIBAL-H.

### Fragment 2

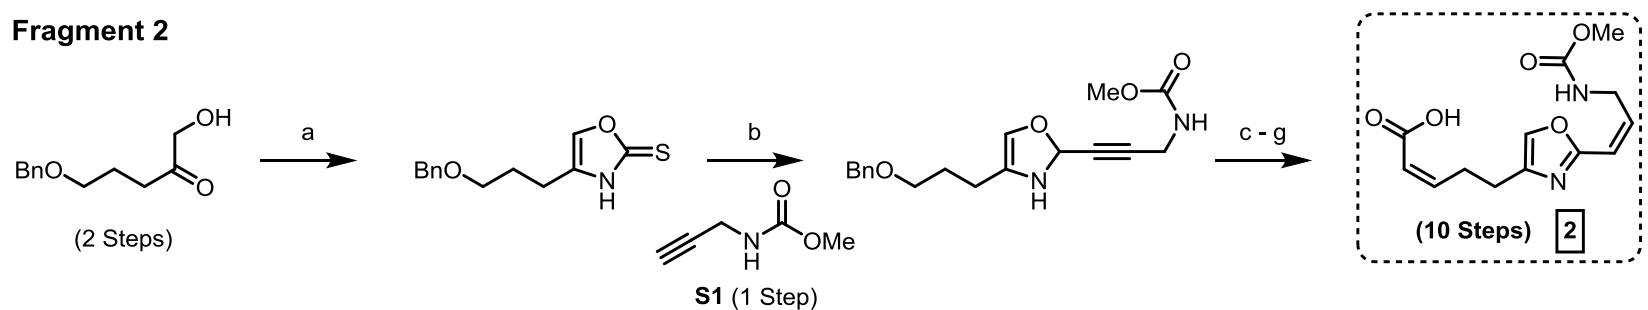

Key: (a) KSCN, HCl; (b) **S1**, Pd(PPh<sub>3</sub>)<sub>4</sub>, CuTC, CuI, Et<sub>3</sub>N, MW; (c) H<sub>2</sub>, Lindlar cat.; (d) BCl<sub>3</sub>; (e) DMP, py; (f) (CF<sub>3</sub>CH<sub>2</sub>O)<sub>2</sub>P(O)CH<sub>2</sub>CO<sub>2</sub>Me, KHMDS, 18-crown-6; (g) LiOH.

### Fragment Union and End Game

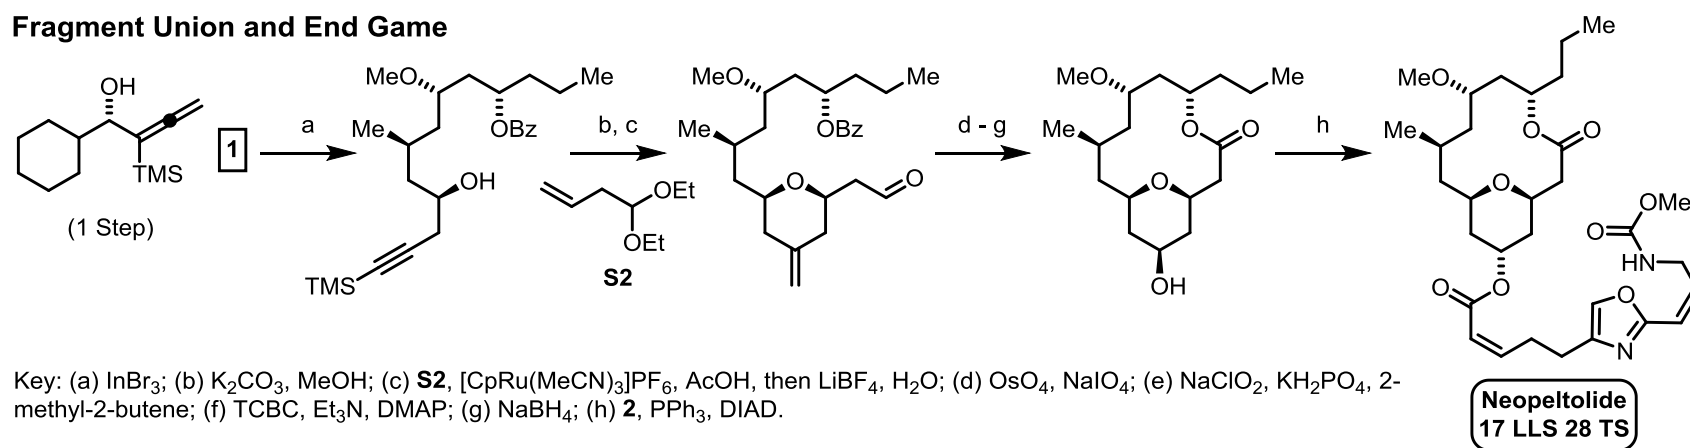

Key: (a) InBr<sub>3</sub>; (b) K<sub>2</sub>CO<sub>3</sub>, MeOH; (c) **S2**, [CpRu(MeCN)<sub>3</sub>]PF<sub>6</sub>, AcOH, then LiBF<sub>4</sub>, H<sub>2</sub>O; (d) OsO<sub>4</sub>, NaIO<sub>4</sub>; (e) NaClO<sub>2</sub>, KH<sub>2</sub>PO<sub>4</sub>, 2-methyl-2-butene; (f) TCBC, Et<sub>3</sub>N, DMAP; (g) NaBH<sub>4</sub>; (h) **2**, PPh<sub>3</sub>, DIAD.

J. Hong *et al.* *Angew. Chem. Int. Ed.* **2009**, *48*, 7577.

### Fragment 1

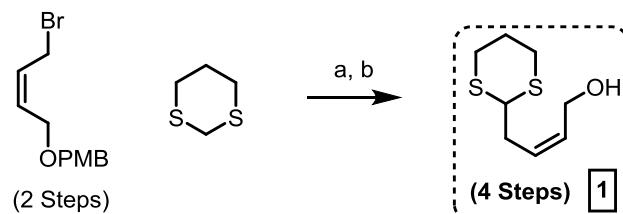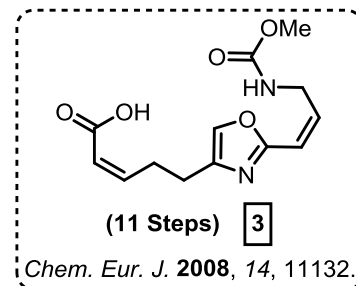

Key: (a) *n*BuLi; (b) TsOH.

### Fragment 2

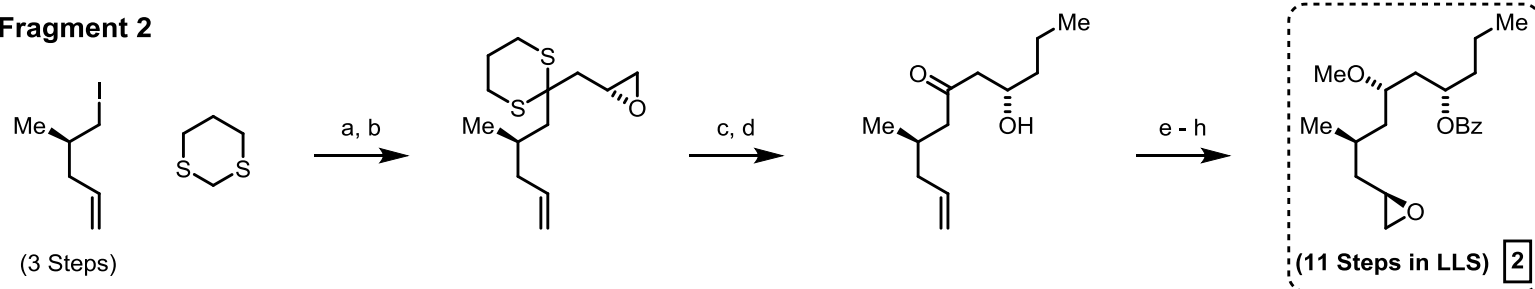

Key: (a) *n*BuLi; (b) *n*BuLi, then (*R*)-epichlorohydrin; (c) EtMgBr, CuI; (d) MeI, CaCO<sub>3</sub>; (e) PhCHO, Sml<sub>2</sub>; (f) Me<sub>3</sub>OBF<sub>4</sub>, proton sponge; (g) AD mix-β; (h) NaH, *N*-4-toluenesulfonylimidazole.

### Fragment Union and End Game

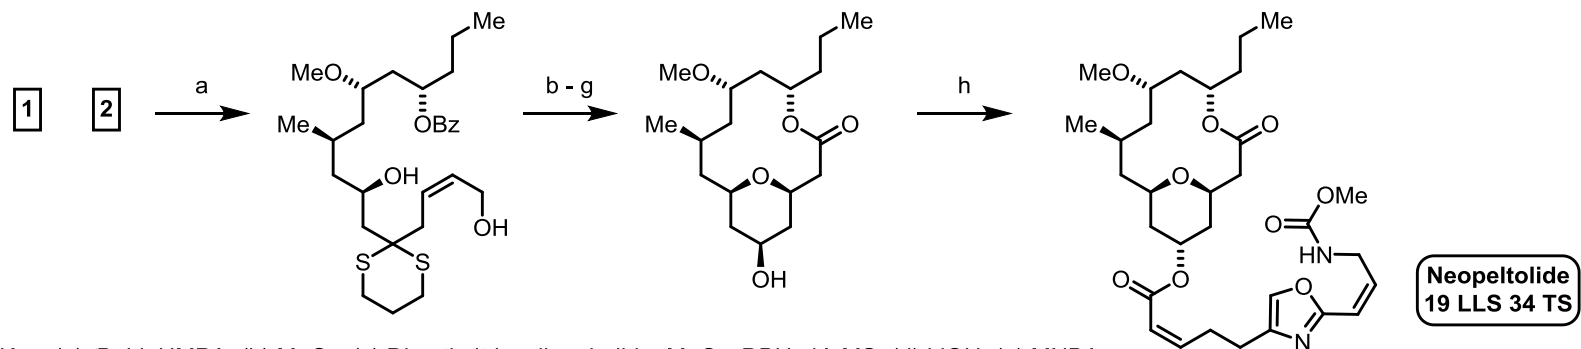

Key: (a) *t*BuLi, HMPA; (b) MnO<sub>2</sub>; (c) Dimethyltriazolium iodide, MnO<sub>2</sub>, DBU, 4A MS; (d) LiOH; (e) MNBA, DMAP; (f) MeI, CaCO<sub>3</sub>; (g) NaBH<sub>4</sub>; (h) **3**, PPh<sub>3</sub>, DIAD.

K. Floreancig *et al. Angew. Chem. Int. Ed.* **2009**, *48*, 4567.

### Fragment 1

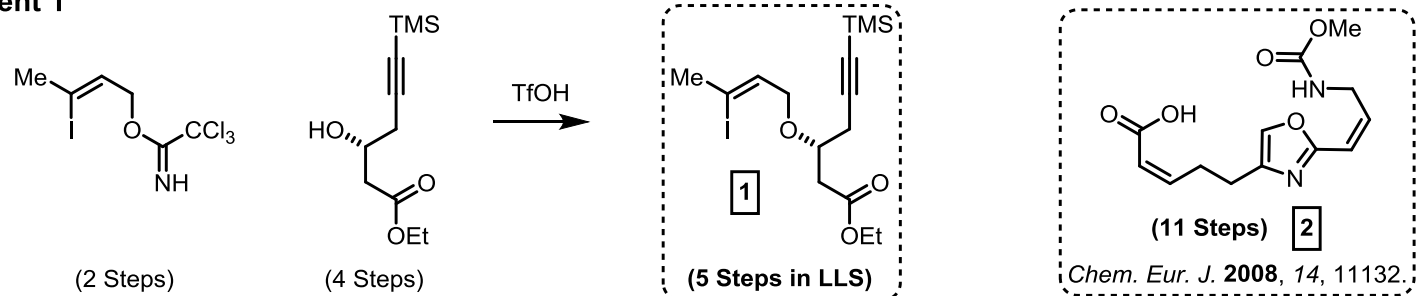

### Fragment Union and End Game

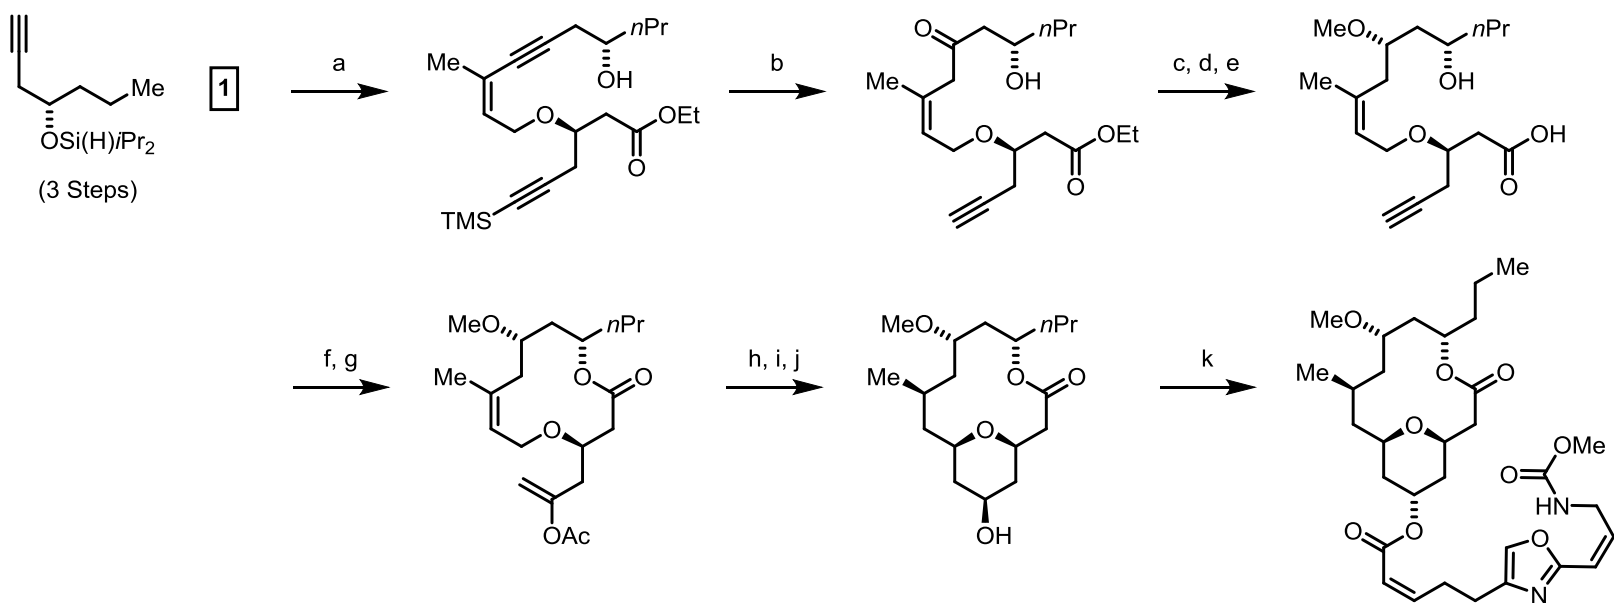

Key: (a)  $(\text{PPh}_3)_2\text{PdCl}_2$ , CuI,  $i\text{Pr}_2\text{NH}$ ; (b) Pt(DVDS), then  $\text{H}_2\text{O}_2$ , KF, TBAF,  $\text{KHCO}_3$ ; (c) EtCHO,  $\text{SmI}_2$ ; (d)  $\text{Me}_3\text{OBF}_4$ , proton sponge; (e) LiOH; (f) TCBC,  $\text{Et}_3\text{N}$ , DMAP; (g)  $[\text{Ru}(p\text{-cymene})\text{Cl}_2]_2$ ,  $(2\text{-furyl})_3\text{P}$ , 1-decyne, HOAc,  $\text{Na}_2\text{CO}_3$ ; (h) DDQ, 2,6- $\text{Cl}_2\text{py}$ ,  $\text{LiClO}_4$ ; (i)  $\text{H}_2$ , Pd/C; (j)  $\text{NaBH}_4$ ; (k) **2**,  $\text{PPh}_3$ , DIAD.

L. Fuwa & Sasaki *et al. Angew. Chem. Int. Ed.* **2010**, *49*, 3041.

### Fragment 1

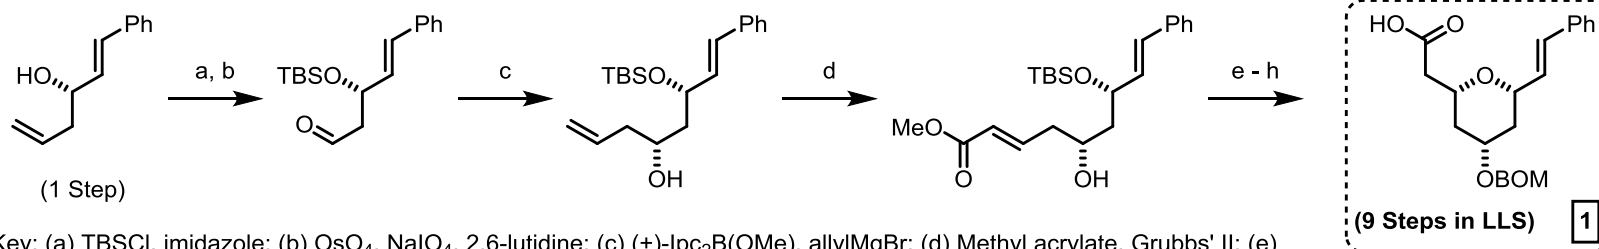

Key: (a) TBSCl, imidazole; (b) OsO<sub>4</sub>, NaIO<sub>4</sub>, 2,6-lutidine; (c) (+)-Ipc<sub>2</sub>B(OMe), allylMgBr; (d) Methyl acrylate, Grubbs' II; (e) BOMCl, DIPEA, TBAI; (f) TBAF, AcOH; (g) DBU; (h) TMSOK.

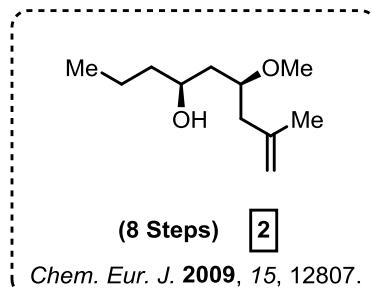

*Chem. Eur. J.* **2009**, *15*, 12807.

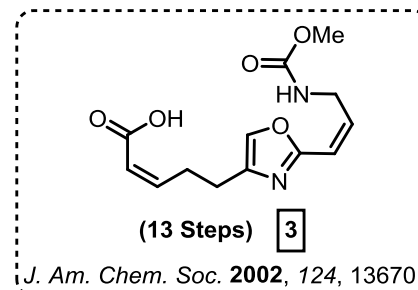

*J. Am. Chem. Soc.* **2002**, *124*, 13670.

### Fragment Union and End Game

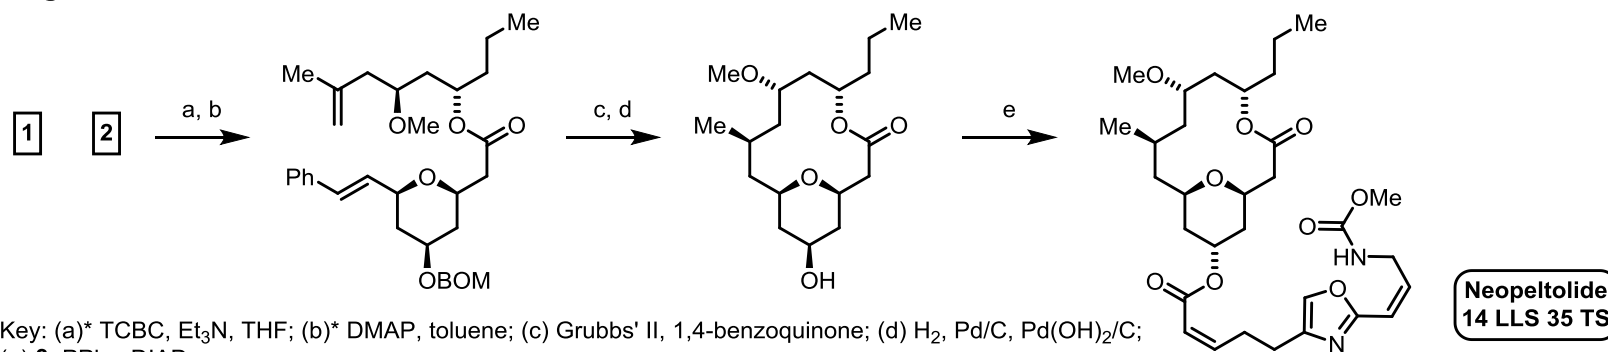

Key: (a)\* TCBC, Et<sub>3</sub>N, THF; (b)\* DMAP, toluene; (c) Grubbs' II, 1,4-benzoquinone; (d) H<sub>2</sub>, Pd/C, Pd(OH)<sub>2</sub>/C; (e) **3**, PPh<sub>3</sub>, DIAD.

\* The Yamaguchi lactonization is considered as a two-step sequence because experimental protocol involves evaporation/exchange of solvent and more than one functional group transformation. See "Rules for Calculating Step Counts" section for more details.

M. Yadav *et al.* *Tetrahedron* **2010**, *66*, 480.

### Fragment 1

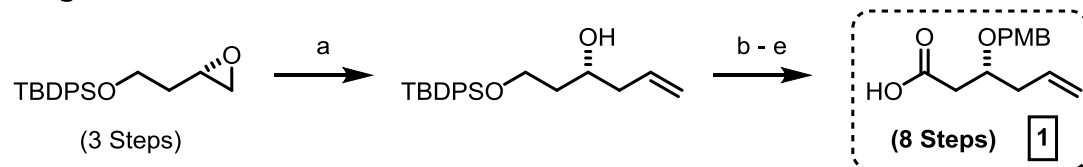

Key: (a) VinylMgBr, CuI; (b) PMBO(C=NH)CCl<sub>3</sub>, CSA; (c) TBAF; (d) DMP; (e) NaClO<sub>2</sub>, NaH<sub>2</sub>PO<sub>4</sub>, 2-methyl-2-butene.

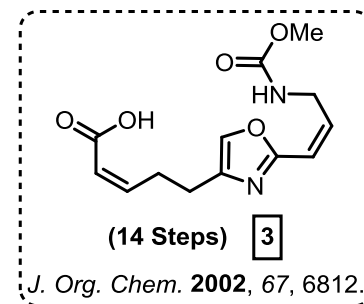

*J. Org. Chem.* **2002**, *67*, 6812.

### Fragment 2

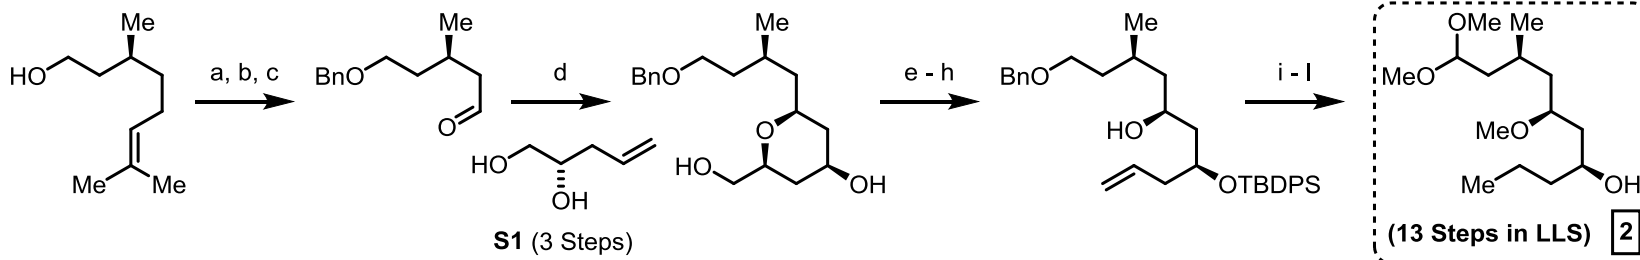

Key: (a) BnBr, NaH, TBAI; (b) H<sub>2</sub>O<sub>2</sub>, (PhSe)<sub>2</sub>, tBuOOH, MgSO<sub>4</sub>; (c) O<sub>3</sub>, then DMS; (d) **S1**, TFA, then K<sub>2</sub>CO<sub>3</sub>; (e) TsCl, Et<sub>3</sub>N; (f) TBDPSCI, DMAP, imidazole; (g) NaI; (h) Zn; (i) Me<sub>3</sub>OBF<sub>4</sub>, proton sponge; (j) H<sub>2</sub>, Raney Ni; (k) DMP, NaHCO<sub>3</sub>; (l) PTSA, CH(OMe)<sub>3</sub>.

### Fragment Union and End Game

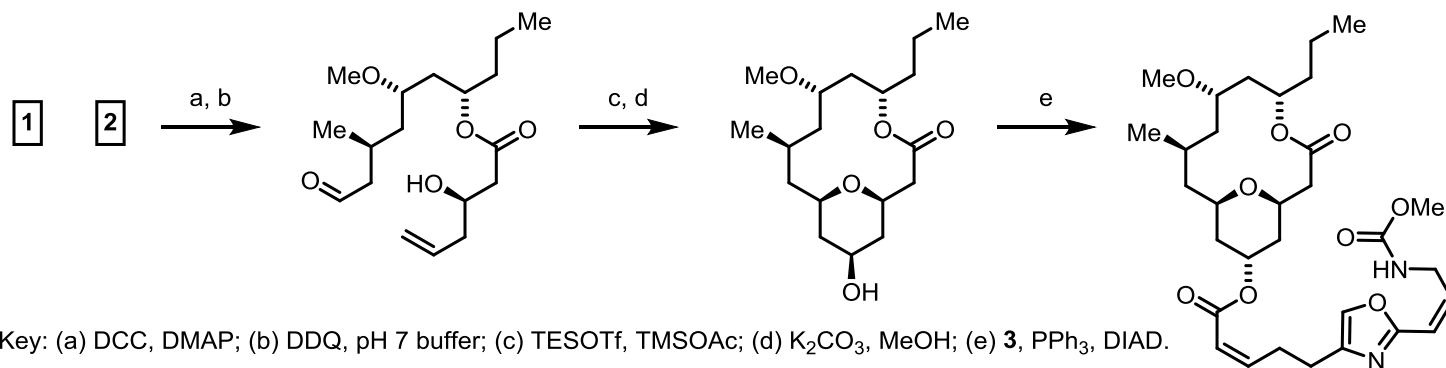

Key: (a) DCC, DMAP; (b) DDQ, pH 7 buffer; (c) TESOTf, TMSOAc; (d) K<sub>2</sub>CO<sub>3</sub>, MeOH; (e) **3**, PPh<sub>3</sub>, DIAD.

**Neopeltolide**  
**18 LLS 42 TS**

N. Jennings *et al. J. Org. Chem.* **2010**, *75*, 4095.

### Completion of Synthesis

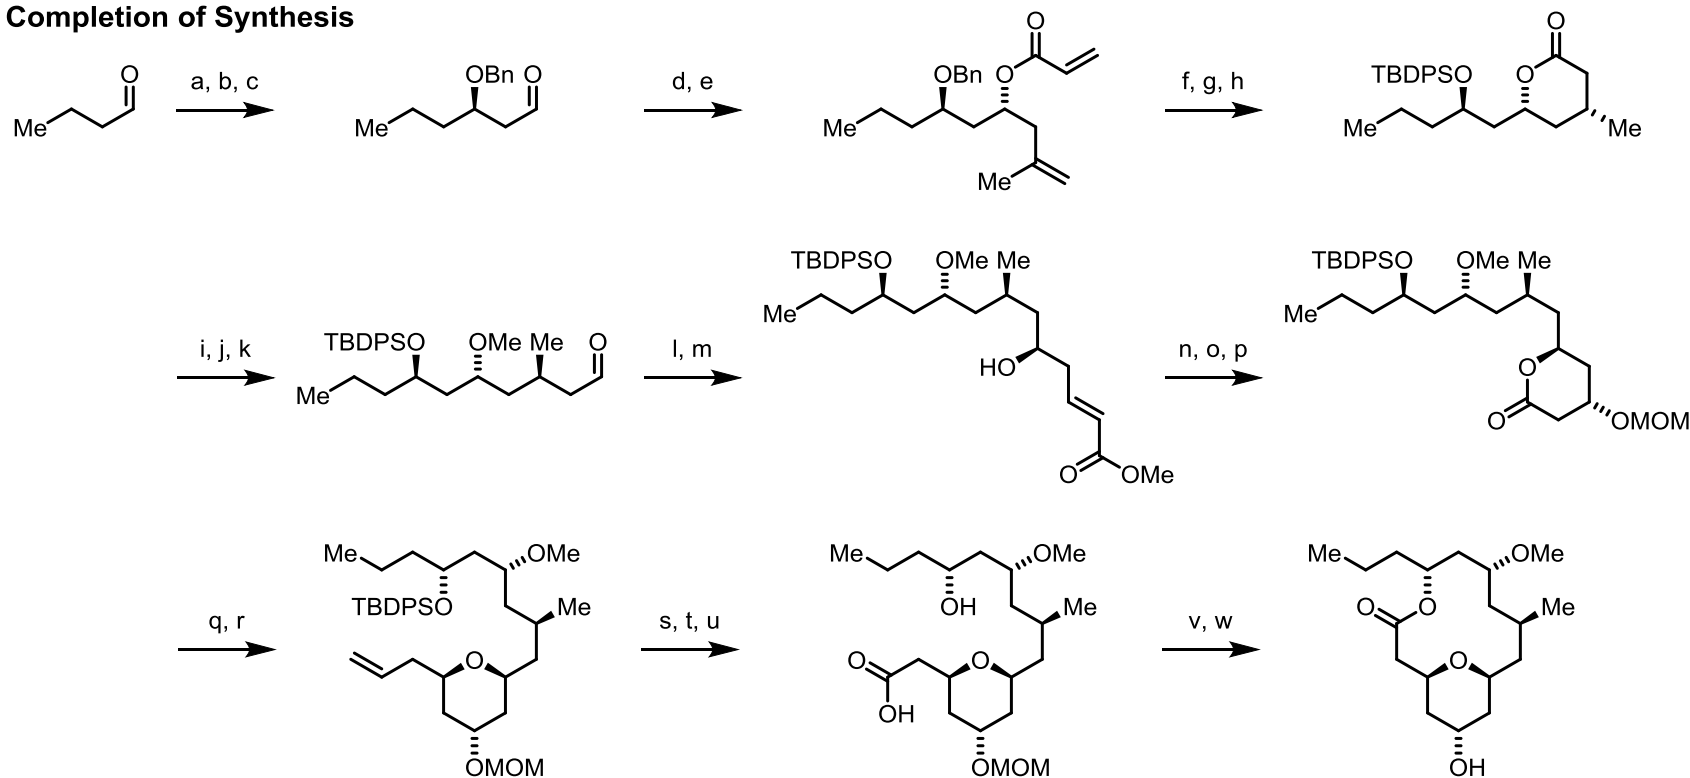

Key: (a) (-)-Ipc<sub>2</sub>Ballyl; (b) BnBr, NaH, TBAI; (c) O<sub>3</sub>; (d) TiCl<sub>4</sub>, CH<sub>2</sub>=C(Me)CH<sub>2</sub>TMS; (e) Acryloyl chloride, DIPEA; (f) Grubbs' II; (g) H<sub>2</sub>, Pd/C; (h) TBDPSCl, imidazole; (i) MeNH(OMe)·HCl, Me<sub>3</sub>Al; (j) Me<sub>3</sub>OBF<sub>4</sub>, proton sponge; (k) DIBAL-H; (l) (+)-Ipc<sub>2</sub>Ballyl; (m) Grubbs' II, methyl acrylate; (n) PhCHO, KO<sup>t</sup>Bu; (o) H<sub>2</sub>, Pd(OH)<sub>2</sub>; (p) MOMCl, DIPEA; (q) AllylMgBr; (r) TFA, Et<sub>3</sub>SiH; (s) O<sub>3</sub>; (t) NaClO<sub>2</sub>, NaH<sub>2</sub>PO<sub>4</sub>, 2-methyl-2-butene; (u) TBAF; (v) TCBC, DMAP; (w) HCl; (x) (CF<sub>3</sub>CH<sub>2</sub>O)<sub>2</sub>P(O)CH<sub>2</sub>CO<sub>2</sub>H, EDCI·HCl, HOBT·H<sub>2</sub>O; (y) 18-Crown-6, KHMDS, then **1**.

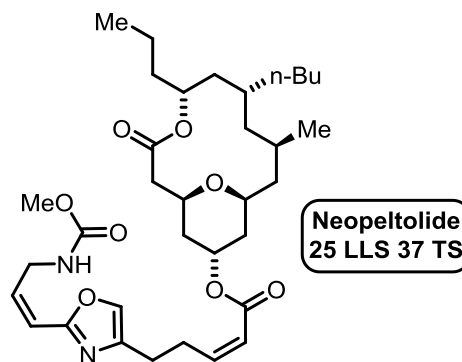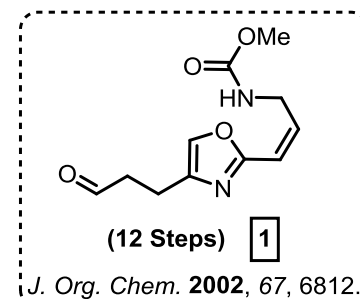



O. Sharma *et al.* *Org. Biomol. Chem.* **2012**, *10*, 3689.

### Fragment 1

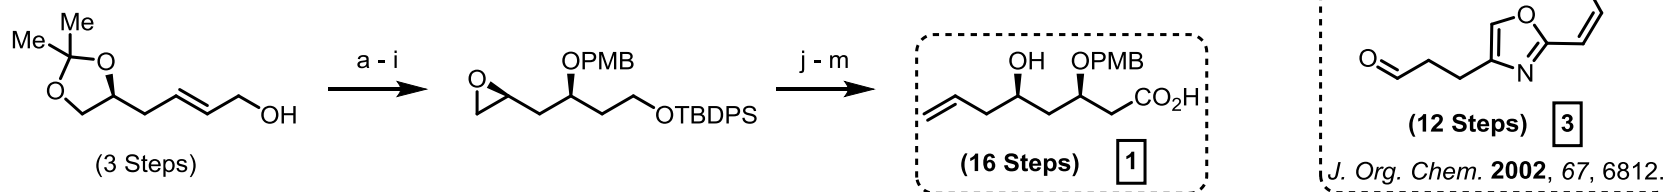

Key: (a) (-)-DIPT, Ti(O*i*Pr)<sub>4</sub>, cumene hydroperoxide, 4A MS; (b) Red-Al; (c) NaIO<sub>4</sub>, NaHCO<sub>3</sub>; (d) PMPCH(OMe)<sub>2</sub>, PPTS; (e) DIBAL-H; (f) TBDPSCI, imidazole; (g) CuCl<sub>2</sub>·2H<sub>2</sub>O; (h) TsCl, Bu<sub>2</sub>SnO, Et<sub>3</sub>N; (i) K<sub>2</sub>CO<sub>3</sub>, MeOH; (j) VinylMgBr, CuI; (k) MOMCl, DIPEA, DMAP; (l) TBAF; (m) TEMPO, BAIB.

### Fragment 2

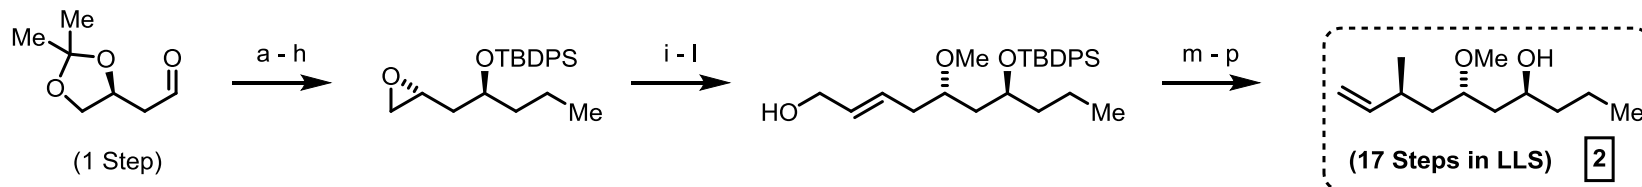

Key: (a) *n*-PrBr, Mg; (b) (COCl)<sub>2</sub>, DMSO, Et<sub>3</sub>N; (c) LAH, LiI; (d) TBDPSCI, imidazole; (e) CuCl<sub>2</sub>·2H<sub>2</sub>O; (f) BzCl, Bu<sub>2</sub>SnO, Et<sub>3</sub>N; (g) TsCl, DMAP, Et<sub>3</sub>N; (h) K<sub>2</sub>CO<sub>3</sub>, MeOH; (i) *n*BuLi, BF<sub>3</sub>·OEt<sub>2</sub>; (j) MeI, NaH; (k) PPTS; (l) Red-Al; (m) (-)-DIPT, Ti(O*i*Pr)<sub>4</sub>, cumene hydroperoxide, 4A MS; (n) Me<sub>3</sub>Al; (o) PPh<sub>3</sub>, I<sub>2</sub>, imidazole; (p) TBAF.

### Fragment Union and End Game

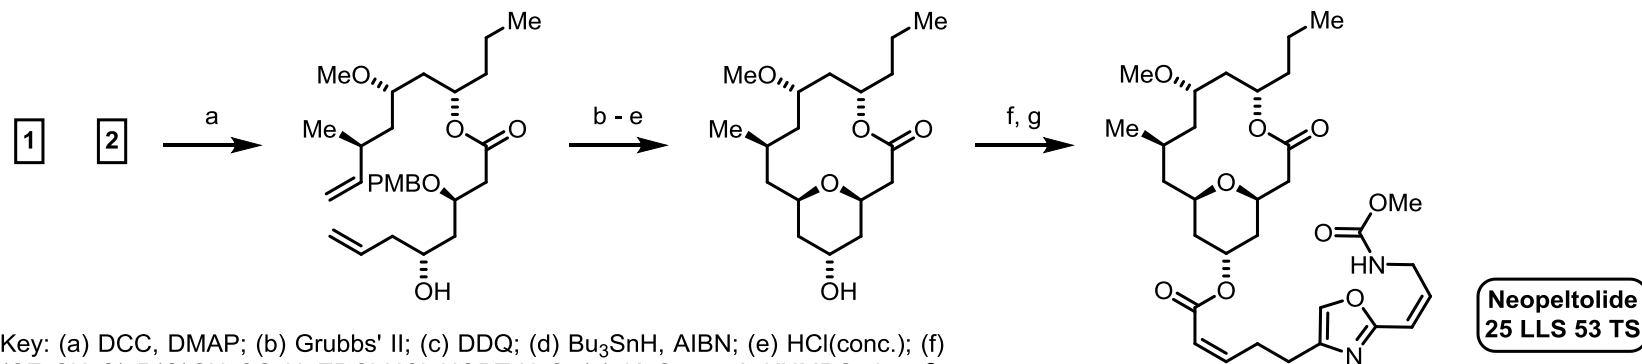

Key: (a) DCC, DMAP; (b) Grubbs' II; (c) DDQ; (d) Bu<sub>3</sub>SnH, AIBN; (e) HCl(conc.); (f) (CF<sub>3</sub>CH<sub>2</sub>O)<sub>2</sub>P(O)CH<sub>2</sub>CO<sub>2</sub>H, EDCl·HCl, HOBT·H<sub>2</sub>O; (g) 18-Crown-6, KHMDS, then **3**.

P. Raghavan *et al.* *Org. Lett.* **2012**, *14*, 2346.

### Fragment 1

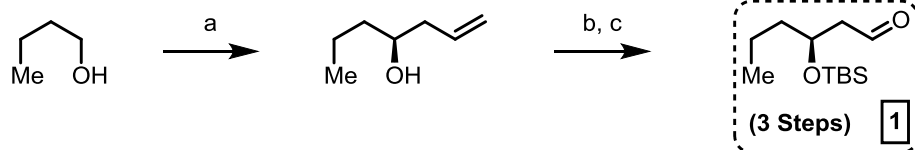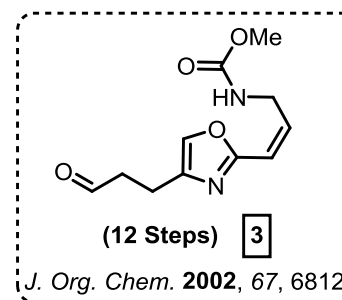

*J. Org. Chem.* **2002**, *67*, 6812.

Key: (a) Allyl acetate, Krische's Ir cat.; (b) TBSCl, imidazole; (c) O<sub>3</sub>, then DMS.

### Fragment 2

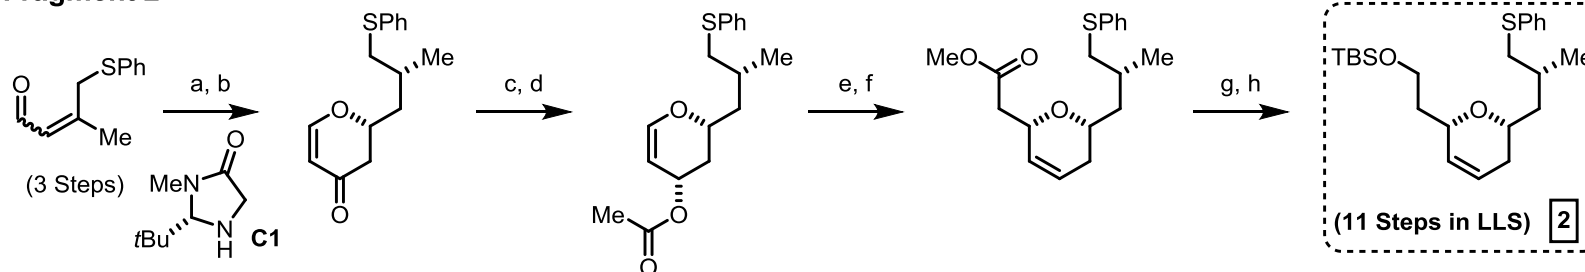

Key: (a) Hantzsch ester, **C1**•CCl<sub>3</sub>CO<sub>2</sub>H; (b) Danishefsky's diene, Jacobsen's Cr(III) cat., then TFA; (c) NaBH<sub>4</sub>, CeCl<sub>3</sub>•7H<sub>2</sub>O; (d) Ac<sub>2</sub>O, Et<sub>3</sub>N, DMAP; (e) LDA, TMSCl, then HCl; (f) CH<sub>2</sub>N<sub>2</sub>; (g) LAH; (h) TBSCl, imidazole.

### Fragment Union and End Game

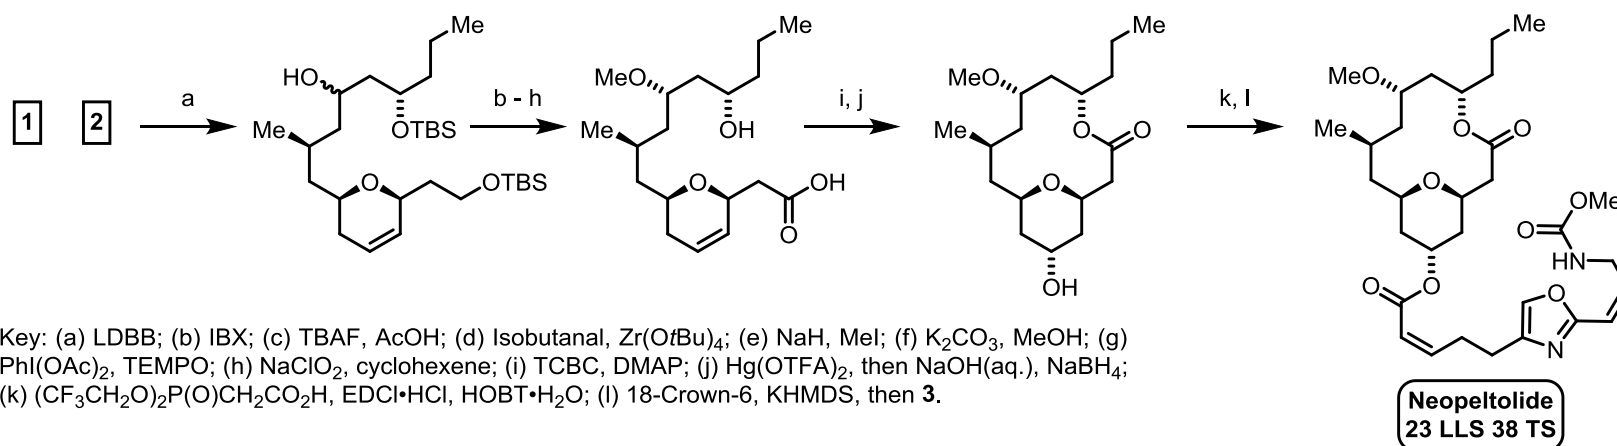

Key: (a) LDBB; (b) IBX; (c) TBAF, AcOH; (d) Isobutanol, Zr(O*t*Bu)<sub>4</sub>; (e) NaH, MeI; (f) K<sub>2</sub>CO<sub>3</sub>, MeOH; (g) PhI(OAc)<sub>2</sub>, TEMPO; (h) NaClO<sub>2</sub>, cyclohexene; (i) TCBC, DMAP; (j) Hg(OTFA)<sub>2</sub>, then NaOH(aq.), NaBH<sub>4</sub>; (k) (CF<sub>3</sub>CH<sub>2</sub>O)<sub>2</sub>P(O)CH<sub>2</sub>CO<sub>2</sub>H, EDCI•HCl, HOBT•H<sub>2</sub>O; (l) 18-Crown-6, KHMDs, then **3**.

**Neopeltolide**  
23 LLS 38 TS

Q. Ghosh *et al.* *J. Org. Chem.* **2012**, *77*, 9840.

### Fragment 1

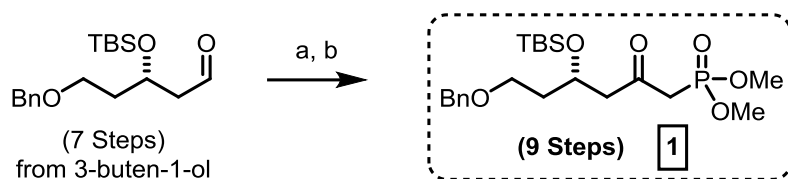

Key: (a) *n*BuLi, MePO(OMe)<sub>2</sub>; (b) DMP.

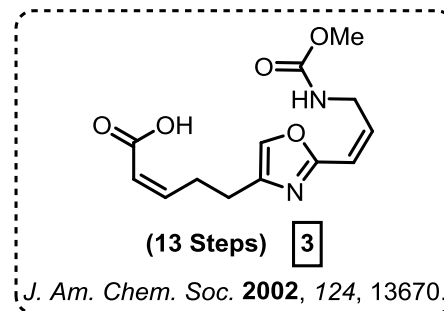

### Fragment 2

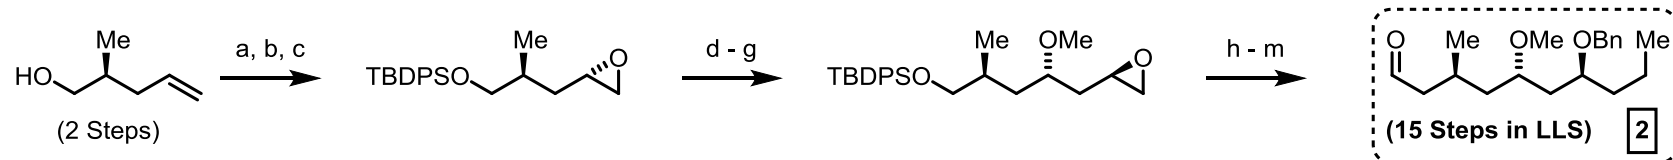

Key: (a) TBDPSCI, Et<sub>3</sub>N, DMAP; (b) *m*CPBA; (c) Jacobsen's (*S,S*)-Co(III) cat., H<sub>2</sub>O; (d) VinylMgBr, CuI; (e) KH, MeI; (f) *m*CPBA; (g) Jacobsen's (*R,R*)-Co(III) cat., H<sub>2</sub>O; (h) EtMgBr, CuI; (i) BnO(C=NH)CCl<sub>3</sub>, TfOH; (j) TBAF; (k) TsCl, Et<sub>3</sub>N, DMAP; (l) NaCN, NaI; (m) DIBAL-H, then NaOH(aq.).

### Fragment Union and End Game

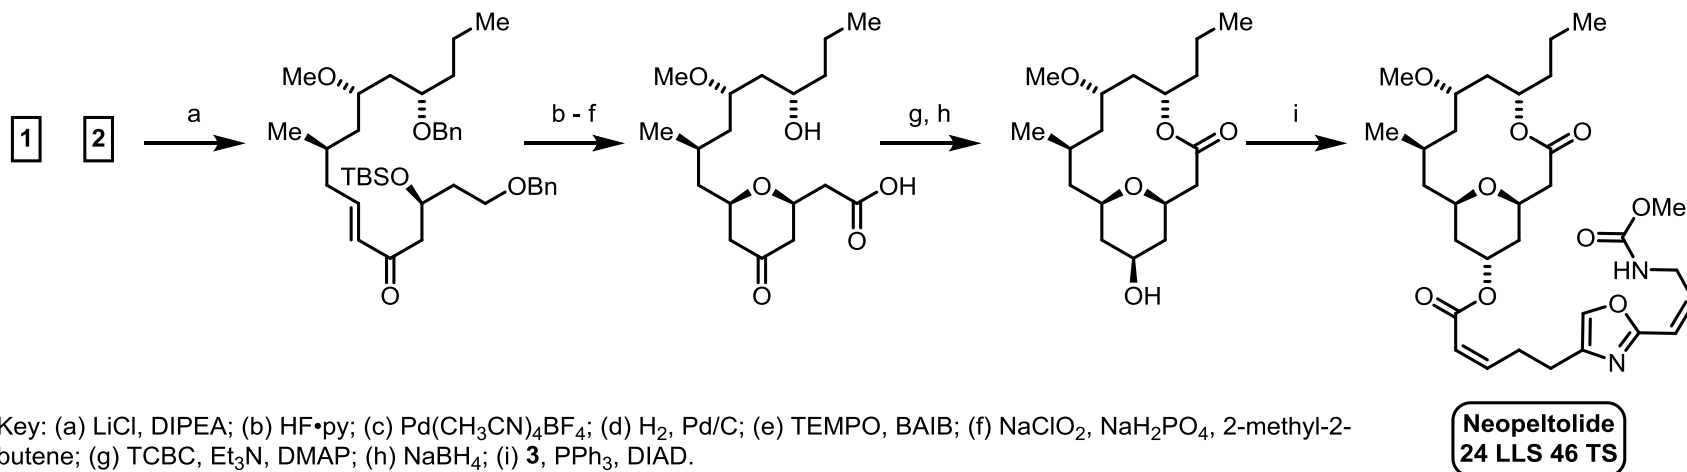

Key: (a) LiCl, DIPEA; (b) HF·py; (c) Pd(CH<sub>3</sub>CN)<sub>4</sub>BF<sub>4</sub>; (d) H<sub>2</sub>, Pd/C; (e) TEMPO, BAIB; (f) NaClO<sub>2</sub>, NaH<sub>2</sub>PO<sub>4</sub>, 2-methyl-2-butene; (g) TCBC, Et<sub>3</sub>N, DMAP; (h) NaBH<sub>4</sub>; (i) **3**, PPh<sub>3</sub>, DIAD.

R. Hoveyda *et al.* *Angew. Chem. Int. Ed.* **2015**, *54*, 215.

### Fragment 1

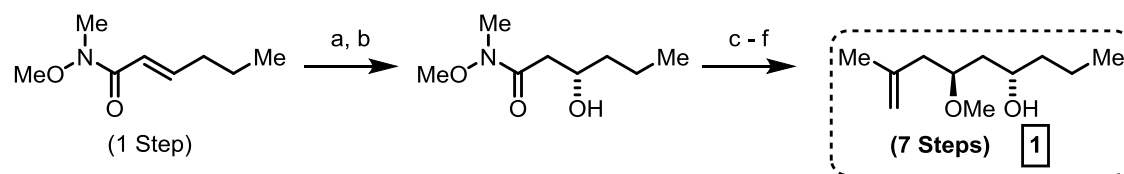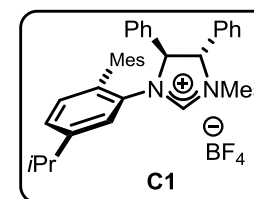

Key: (a) **C1**, B<sub>2</sub>(pin)<sub>2</sub>, DBU; (b) NaBO<sub>3</sub>; (c) methallylMgCl; (d) Sml<sub>2</sub>, PhCHO; (e) Me<sub>3</sub>OBF<sub>4</sub>, proton sponge; (f) KOH, MeOH.

### Fragment 2

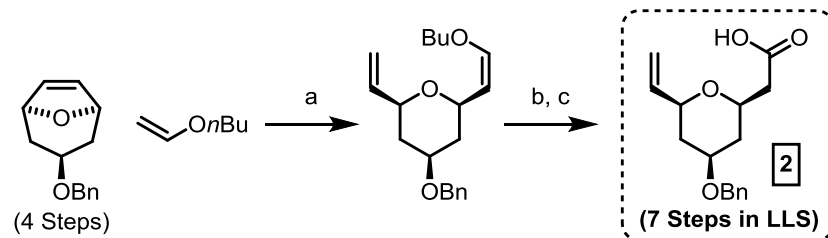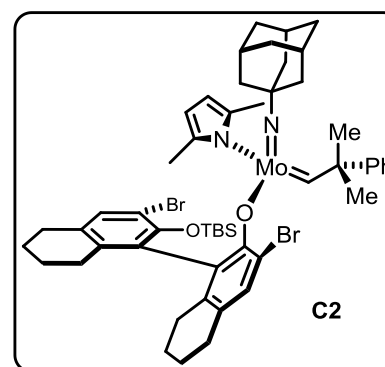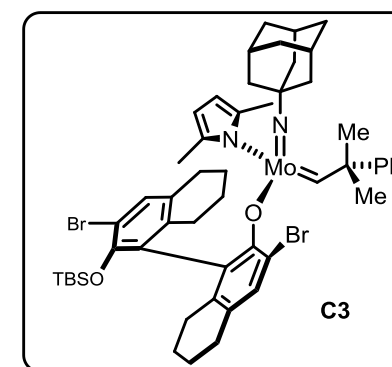

Key: (a) **C2**; (b) HCl (aq); (c) NaClO<sub>2</sub>, NaH<sub>2</sub>PO<sub>4</sub>, 2-methyl-2-butene.

### Fragment 3

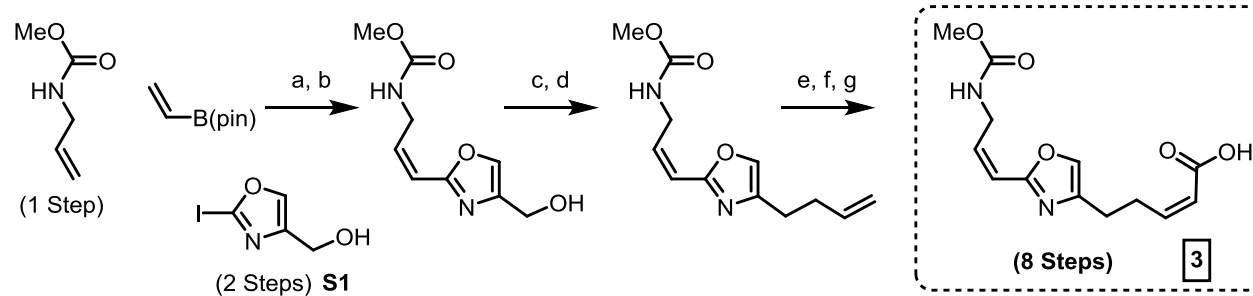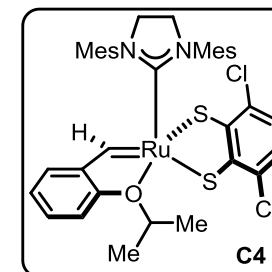

Key: (a) **C3**; (b) **S1**, Pd(dppf)Cl<sub>2</sub>, K<sub>3</sub>PO<sub>4</sub>; (c) PPh<sub>3</sub>, CBr<sub>4</sub>, 2,6-lutidine; (d) CuCN, allylMgBr; (e) **C4**, 2-buten-1,4-diol; (f) DMP, NaHCO<sub>3</sub>; (g) NaClO<sub>2</sub>, NaH<sub>2</sub>PO<sub>4</sub>, 2-methyl-2-butene.

R. Hoveyda *et al.* *Angew. Chem. Int. Ed.* **2015**, *54*, 215. (Cont'd)

### Fragment Union and End Game

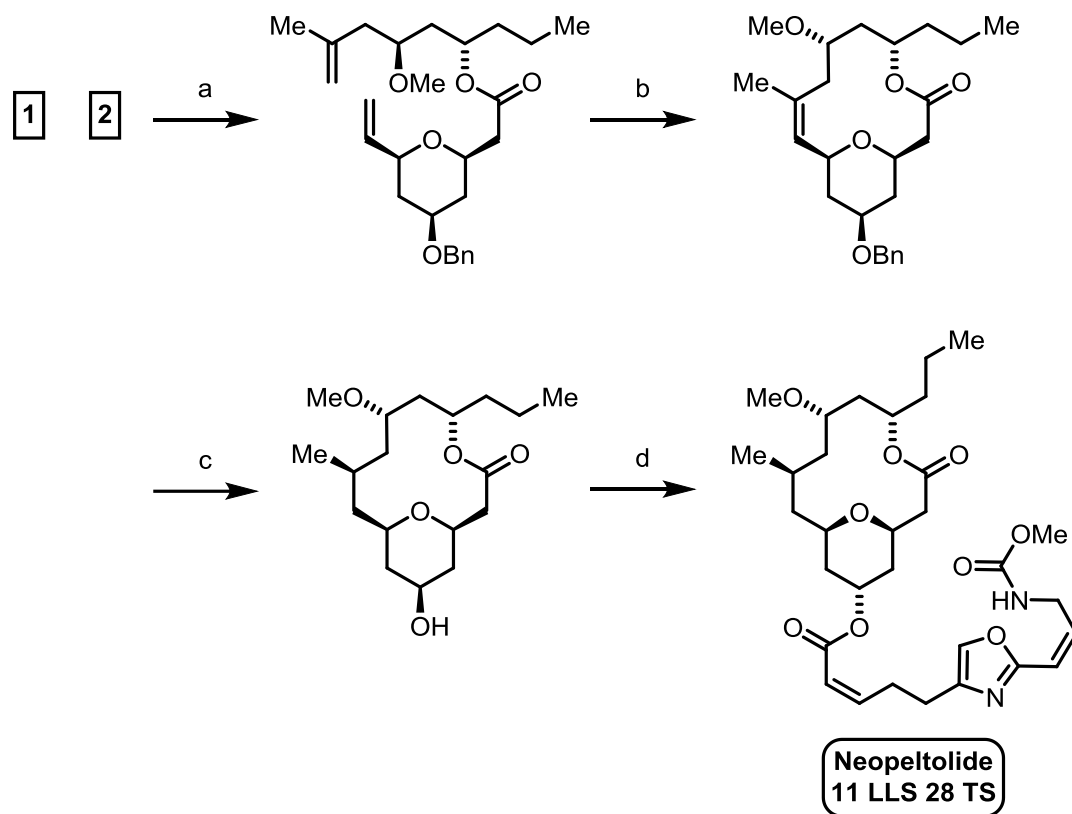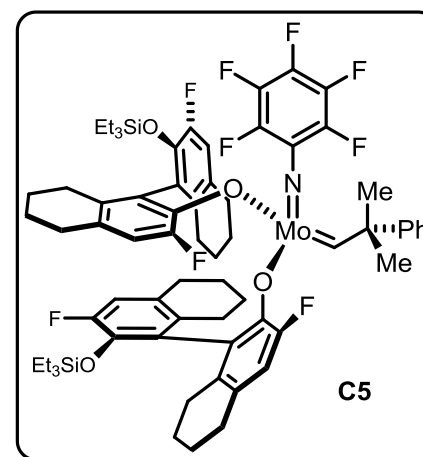

Key: (a) EDC, DMAP, Et<sub>3</sub>N; (b) **C5**, 7 torr; (c) 10% Pd/C, H<sub>2</sub>; (d) **3**, PPh<sub>3</sub>, DIAD.

## Graphical Summary of Previous Syntheses of Mandelalide

A. Fürstner *et al.* *Angew. Chem. Int. Ed.* **2014**, 53, 4217; *Chem. Eur. J.* **2015**, 21, 10416.

### Reagents:

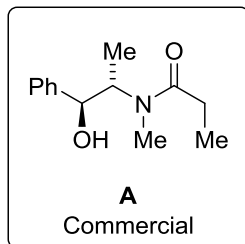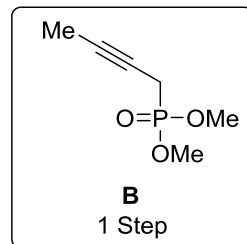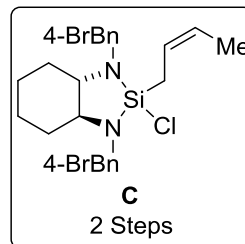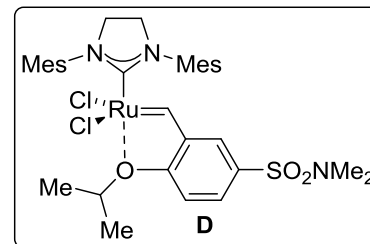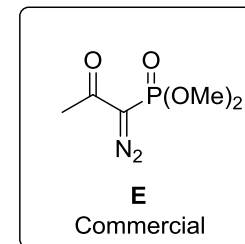

### Fragment 1

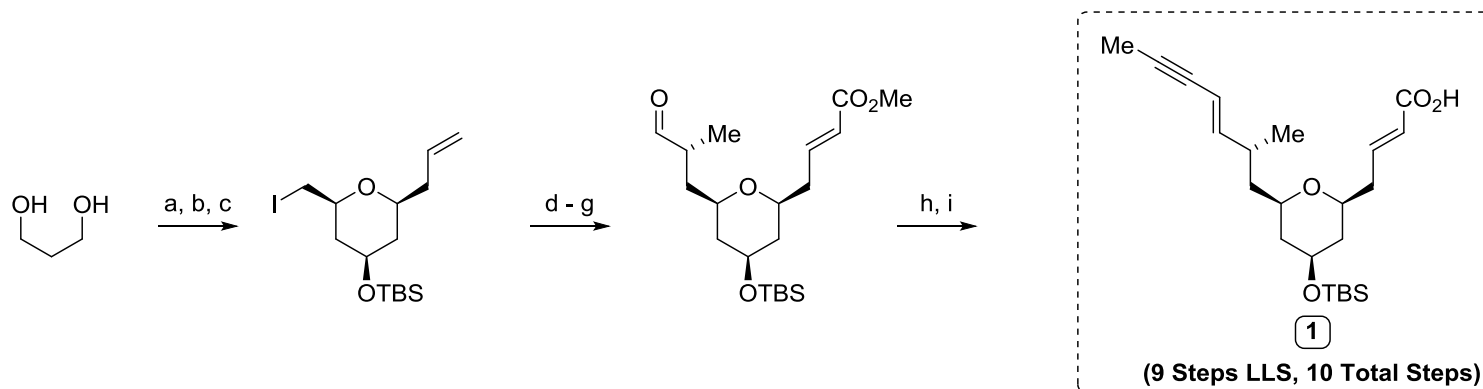

Key: a)  $[\text{Ir}(\text{cod})\text{Cl}]_2$ , (S)-Cl,MeO-BIPHEP, 3-NO<sub>2</sub>-4-Cl-PhCO<sub>2</sub>H, allyl acetate, Cs<sub>2</sub>CO<sub>3</sub>; b) I<sub>2</sub>, NaHCO<sub>3</sub>; c) TBSOTf, 2,6-lutidine; d) LDA, LiCl, **A**; e) LDA, BH<sub>3</sub>-NH<sub>3</sub>; f) methyl acrylate, HG-II; g) DMP; h) LiHMDS, **B**; i) Me<sub>3</sub>SiOK.

A. Fürstner *et al. Angew. Chem. Int. Ed.* **2014**, *53*, 4217; *Chem. Eur. J.* **2015**, *21*, 10416. (Cont'd)

### Fragment 2

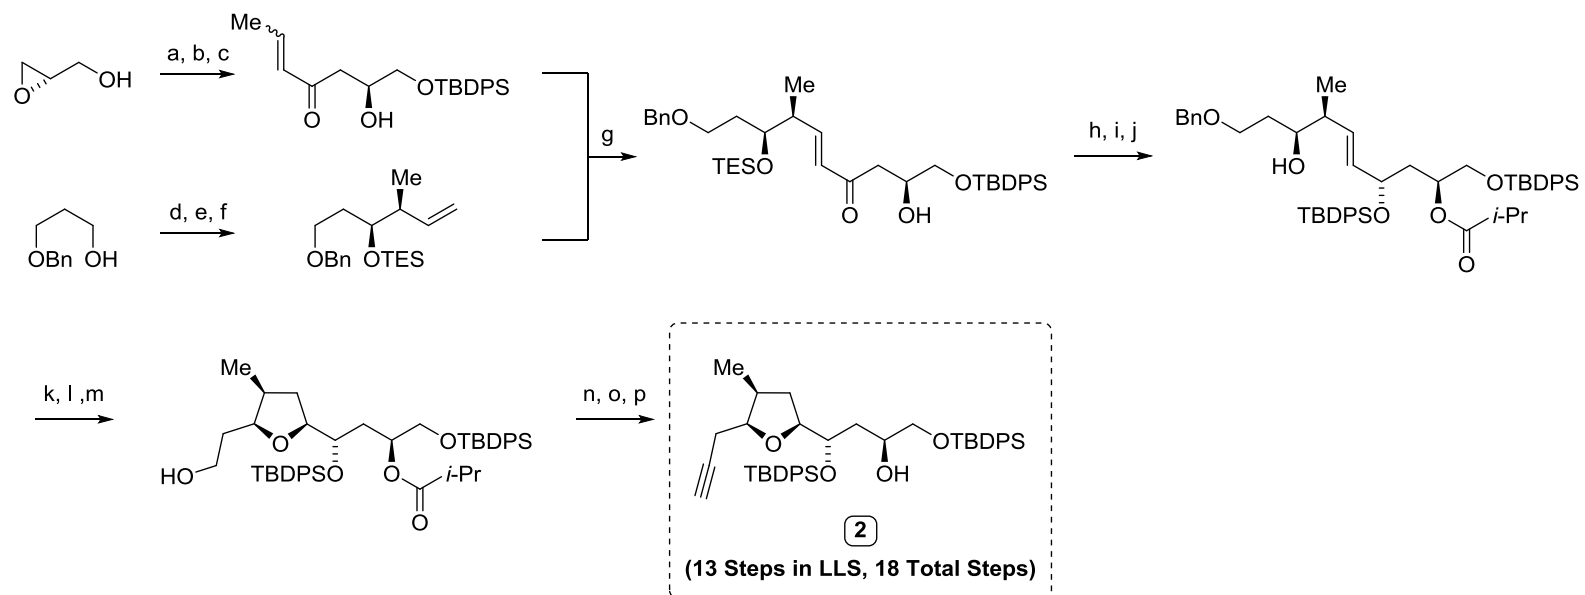

Key: a) TBDPSCl, imidazole; b)  $\text{Co}_2(\text{CO})_8$  (cat.), CO, *N*-(TMS)-morpholine; c)  $\text{Me}(\text{H})\text{C}=\text{CHMgBr}$ ; d)  $[\text{Cu}(\text{MeCN})_4]\text{BF}_4$  (cat.), bpy (cat.); TEMPO, *N*-Me-imidazole, air; e) **C**,  $\text{Sc}(\text{OTf})_3$  (cat.); f) TESCl,  $\text{NEt}_3$ ; DMAP; g) **D**; h) *i*-PrCHO,  $\text{Sml}_2$ ; i) TBDPSCl, imidazole; j) CSA; k) *N*-(PhSe)-phthalimide, TFA,  $\text{Ph}_3\text{P}=\text{S}$ ; l)  $\text{Bu}_3\text{SnH}$ , AIBN; m)  $\text{Pd}(\text{OH})_2/\text{C}$ ,  $\text{H}_2$ ; n) DMP; o) **E**, NaOMe; p) DIBAL-H.

### Fragment 3

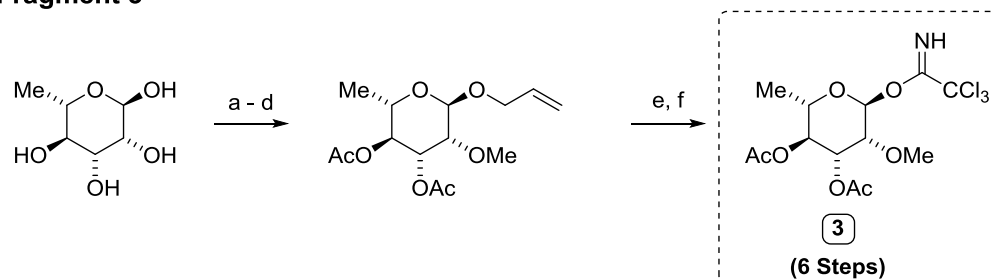

Key: a) Allyl alcohol,  $\text{H}_2\text{SO}_4$ ; b) butane-2,3-dione,  $\text{MeC}(\text{OMe})_3$ ,  $\text{TsOH}\cdot\text{H}_2\text{O}$ ; c) NaH, MeI; d) TFA, then  $\text{Ac}_2\text{O}$ , DMAP,  $\text{NEt}_3$ ; e)  $\text{SeO}_2$ , HOAc; f)  $\text{Cl}_3\text{CCN}$ ,  $\text{Cs}_2\text{CO}_3$ .

A. Fürstner *et al.* *Angew. Chem. Int. Ed.* **2014**, *53*, 4217; *Chem. Eur. J.* **2015**, *21*, 10416. (Cont'd)

### Fragment Union and End Game

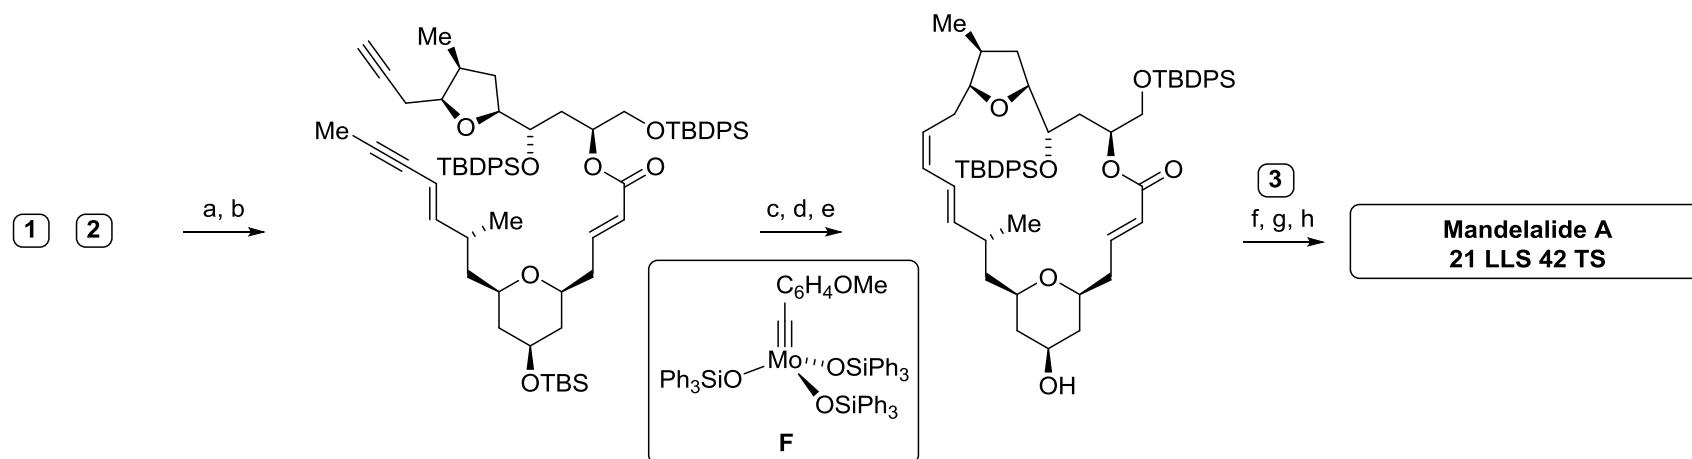

Key: a) DCC, DMAP; b) DBU; c) **F**, 4 and 5 Å MS; d) Zn(Cu/Ag); e) TsOH-H<sub>2</sub>O; f) **3**, TESOTf, 4 Å MS; g) K<sub>2</sub>CO<sub>3</sub>; h) HF-pyridine.



B. Xu & Ye *et al. Angew. Chem. Int. Ed.* **2014**, *53*, 6533.

### Fragment 1

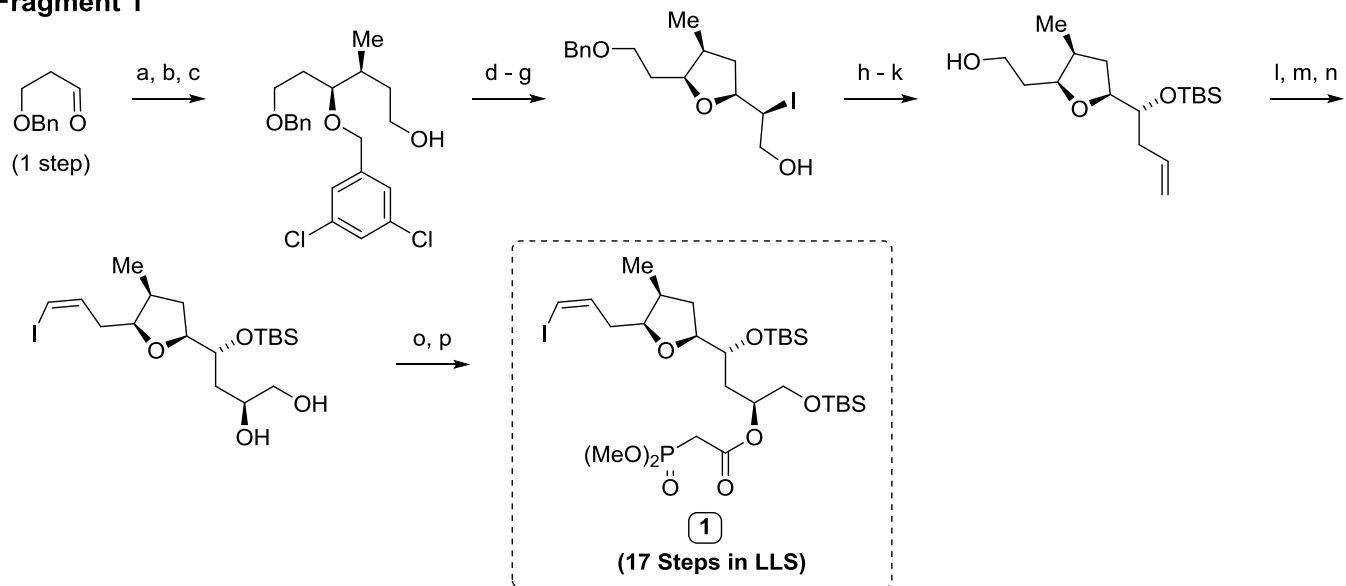

Key: a) (Z)-2-butene, *n*-BuLi, *t*-BuOK, (+)-(lpc)<sub>2</sub>BOMe, BF<sub>3</sub>-OEt<sub>2</sub>, then H<sub>2</sub>O<sub>2</sub>, NaOH; b) NaH, 2,6-Cl<sub>2</sub>BnBr, TBAI; c) 9-BBN, then H<sub>2</sub>O<sub>2</sub>, NaOH; d) DMP, NaHCO<sub>3</sub>; e) LiCl, (MeO)<sub>2</sub>P(O)CH<sub>2</sub>CO<sub>2</sub>Me, *i*-Pr<sub>2</sub>NEt; f) DIBAL-H; g) I<sub>2</sub>; h) K<sub>2</sub>CO<sub>3</sub>; i) CuI, vinylMgBr; j) TBSOTf, 2,6-lutidine; k) DDQ; l) DMP, NaHCO<sub>3</sub>; m) (ICH<sub>2</sub>PPh<sub>3</sub>)I, NaHMDS; n) AD-MIX-β; o) TBSCl, imidazole, DMAP; p) (MeO)<sub>2</sub>P(O)CH<sub>2</sub>CO<sub>2</sub>H, 2,4,6-Cl<sub>3</sub>BzCl, Et<sub>3</sub>N, DMAP.

### Fragment 2

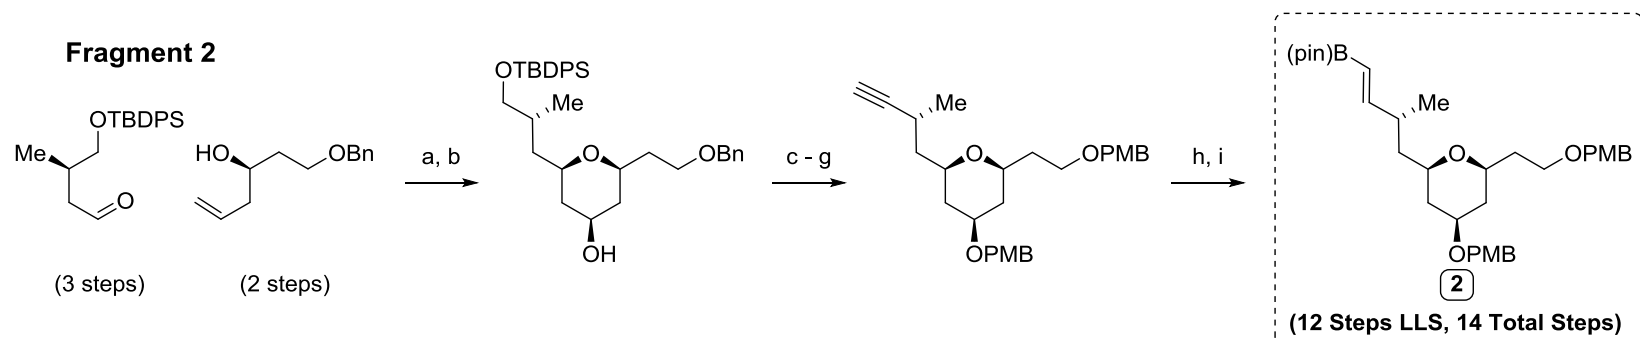

Key: a) TFAI; b) K<sub>2</sub>CO<sub>3</sub>; c) Pd/C, H<sub>2</sub>; d) NaH, PMBBr, TBAI; e) TBAF; f) DMP, NaHCO<sub>3</sub>; g) MeC(N<sub>2</sub>)P(O)(OMe)<sub>2</sub>, K<sub>2</sub>CO<sub>3</sub>; h) HB(pin), Cy<sub>2</sub>BH; i) DDQ.

B. Xu & Ye *et al. Angew. Chem. Int. Ed.* **2014**, *53*, 6533. (Cont'd)

### Fragment 3

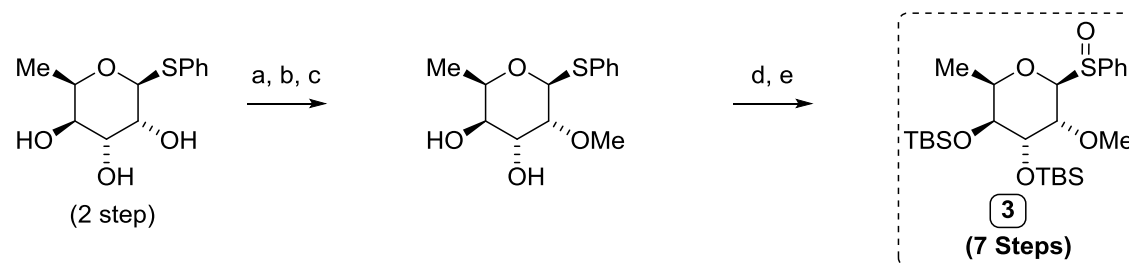

Key: a)  $\text{HC}(\text{OMe})_3$ , 2,2,3,3-(OMe)<sub>4</sub>-butane, CSA; b) NaH, MeI; c) TFA; d) TBSOTf, 2,6-lutidine; e) *m*-CPBA.

### Fragment Union and End Game

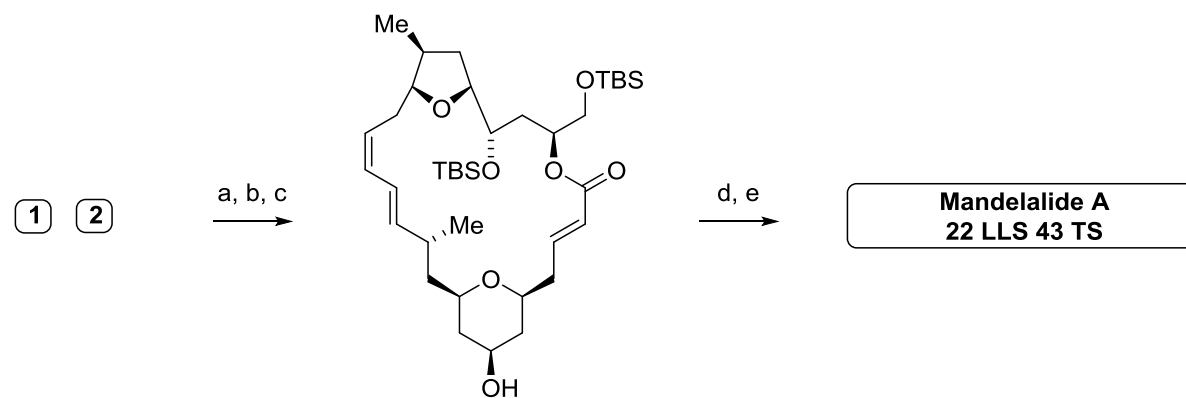

Key: a)  $\text{Pd}(\text{PPh}_3)_4$ ,  $\text{Ag}_2\text{O}$ ; b) TEMPO,  $\text{Ph}(\text{OAc})_2$ ; c) LiCl, *i*-Pr<sub>2</sub>NEt; d) **3**, 4Å MS, 2,6-(*t*-Bu)<sub>2</sub>-4-Me-pyridine  $\text{Tf}_2\text{O}$ ; e) TASF.

C. Altmann *et al. Chem. Eur. J.* **2016**, *22*, 1292.

### Fragment 1

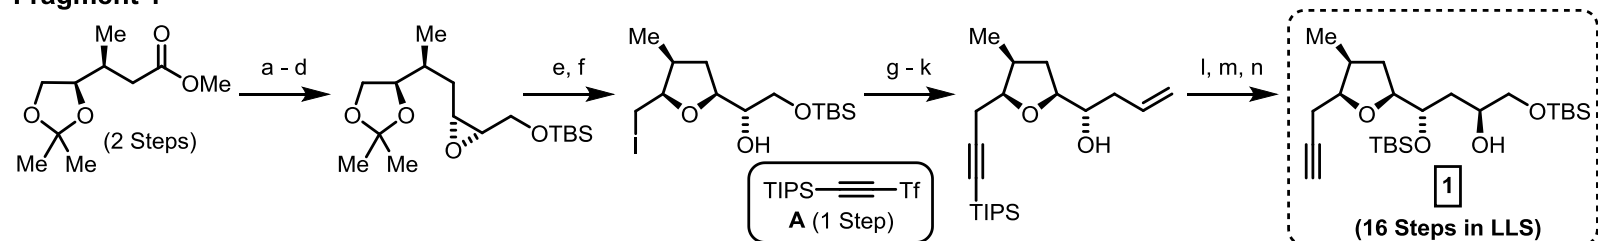

Key: a) DIBAL-H; b)  $(CF_3CH_2O)_2P(O)CH_2CO_2Me$ , KHMDS, 18-crown-6; c) DIBAL-H; d) D-(-)-diethyl tartrate,  $Ti(Oi-Pr)_4$ , *t*-BuOOH then imidazole, DMAP, TBSCl; e)  $FeCl_3 \cdot 6H_2O$ ; f)  $PPh_3$ ,  $I_2$ , imidazole; g)  $(Bu_3Sn)_2$ , UV, **A**; h) AcOH; i)  $PPh_3$ ,  $I_2$ , imidazole; j) NaH; k) vinylMgBr, CuI; (l) TBAF, then TBSOTf, 2,6-lutidine; m) AD-mix- $\alpha$ ; n) TBSCl, imidazole.

### Fragment 2

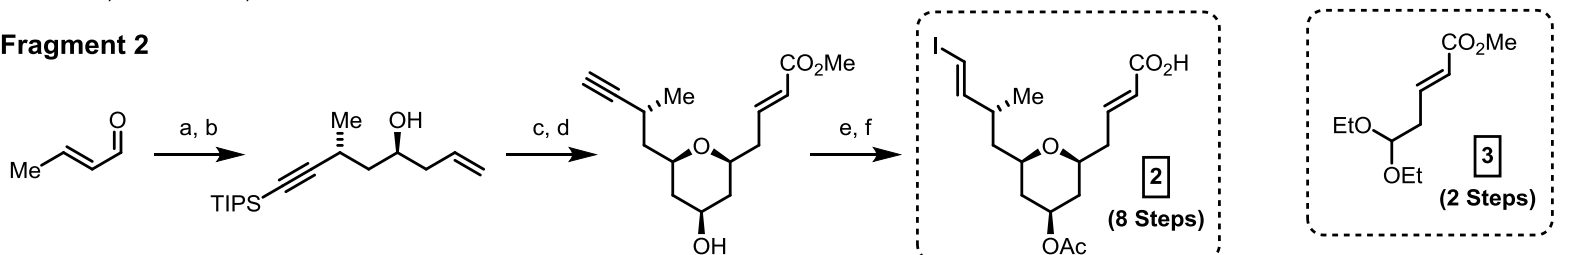

Key: a) TIPS-acetylene,  $[Rh(C_2H_4)_2OAc]_2$ , (*S*)-DTBM-Segphos; b) (*S*)-BINOL,  $Ti(Oi-Pr)_4$ ,  $AllylSnBu_3$ ; c) **3**, TFA; d) TBAF; e)  $Bn_3SnH$ ,  $Pd(dppf)Cl_2$ ,  $I_2$ ; f) TMSOK, then  $Ac_2O$ , DMAP,  $Et_3N$ .

### Fragment Union and End Game

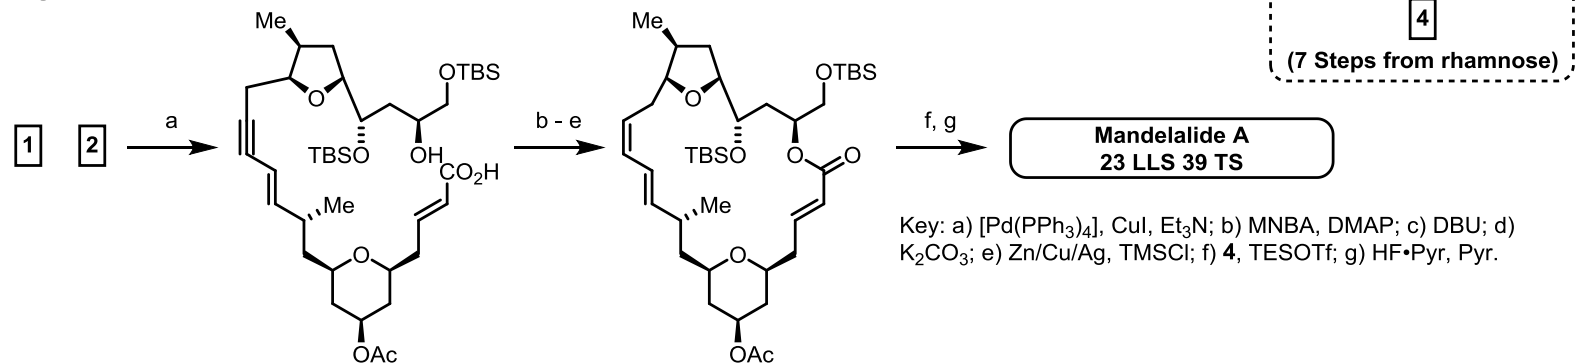

Key: a)  $[Pd(PPh_3)_4]$ , CuI,  $Et_3N$ ; b) MNBA, DMAP; c) DBU; d)  $K_2CO_3$ ; e) Zn/Cu/Ag, TMSCl; f) **4**, TESOTf; g) HF·Pyr, Pyr.

D. Carter *et al.* *J. Am. Chem. Soc.* **2016**, *138*, 770.

### Reagents

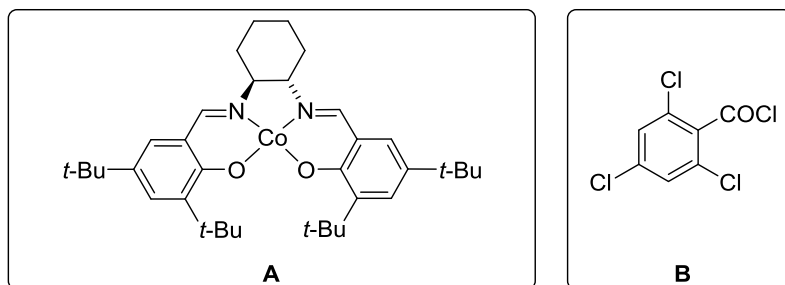

### Fragment 1

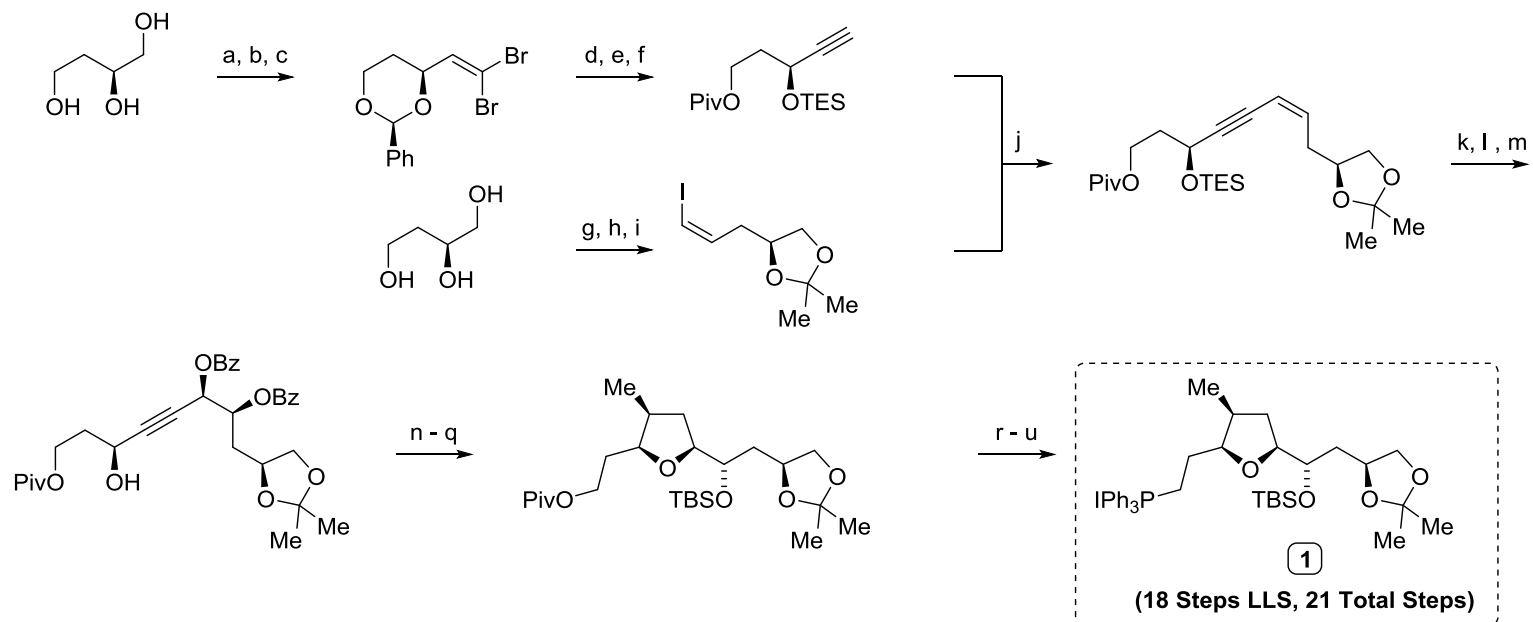

Key: a) *p*-TsOH, PhCH(OMe)<sub>2</sub>; b) (COCl)<sub>2</sub>, DMSO, Et<sub>3</sub>N; c) PPh<sub>3</sub>, CBr<sub>4</sub>; d) *n*-BuLi; e) *p*-TsOH; f) pyridine, PivCl, then DMAP, TESCl; g) *p*-TsOH, acetone; h) PCC, 3 Å MS; i) CH<sub>2</sub>I-PPh<sub>3</sub>I, NaHMDS, DMPU; j) Pd(PPh<sub>3</sub>)<sub>4</sub>, CuI, *i*-Pr<sub>2</sub>NH; k) (DHQD)<sub>2</sub>PHAL, K<sub>2</sub>OsO<sub>4</sub>, *t*-BuOH, H<sub>2</sub>O; l) BzCl, Et<sub>3</sub>N, m) HF-pyridine; n) AgBF<sub>4</sub> (cat.), then MeLi-LiBr; o) TBSOTf, 2,6-lutidine; p) Cp<sub>2</sub>TiMe<sub>2</sub>; q) Rh/Al<sub>2</sub>O<sub>3</sub>, H<sub>2</sub>; r) DIBAL-HI s) Ms<sub>2</sub>O, Et<sub>3</sub>N; t) NaI; u) PPh<sub>3</sub>.

D. Carter *et al.* *J. Am. Chem. Soc.* **2016**, *138*, 770. (Cont'd)

### Fragment 2

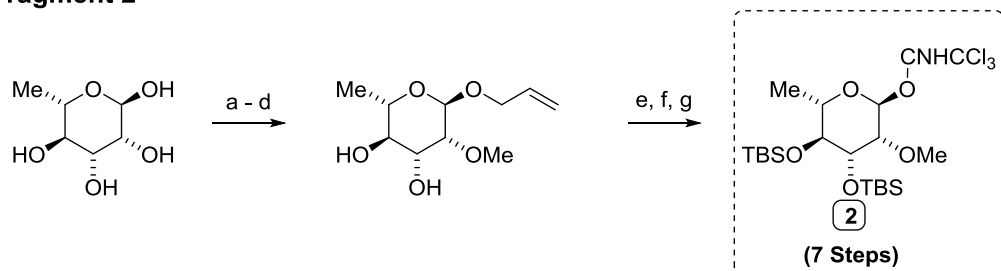

Key: a) Allyl alcohol,  $\text{H}_2\text{SO}_4$ ; b) butane-2,3-dione,  $\text{MeC}(\text{OMe})_3$ ,  $\text{TsOH}\cdot\text{H}_2\text{O}$ ; c)  $\text{NaH}$ ,  $\text{MeI}$ ; d)  $\text{TFA}$ ; e)  $\text{TBSOTf}$ , 2,6-lutidine; f)  $\text{SeO}_2$ ,  $\text{HOAc}$ ; g)  $\text{Cl}_3\text{CCN}$ ,  $\text{Cs}_2\text{CO}_3$ .

### Fragment 3

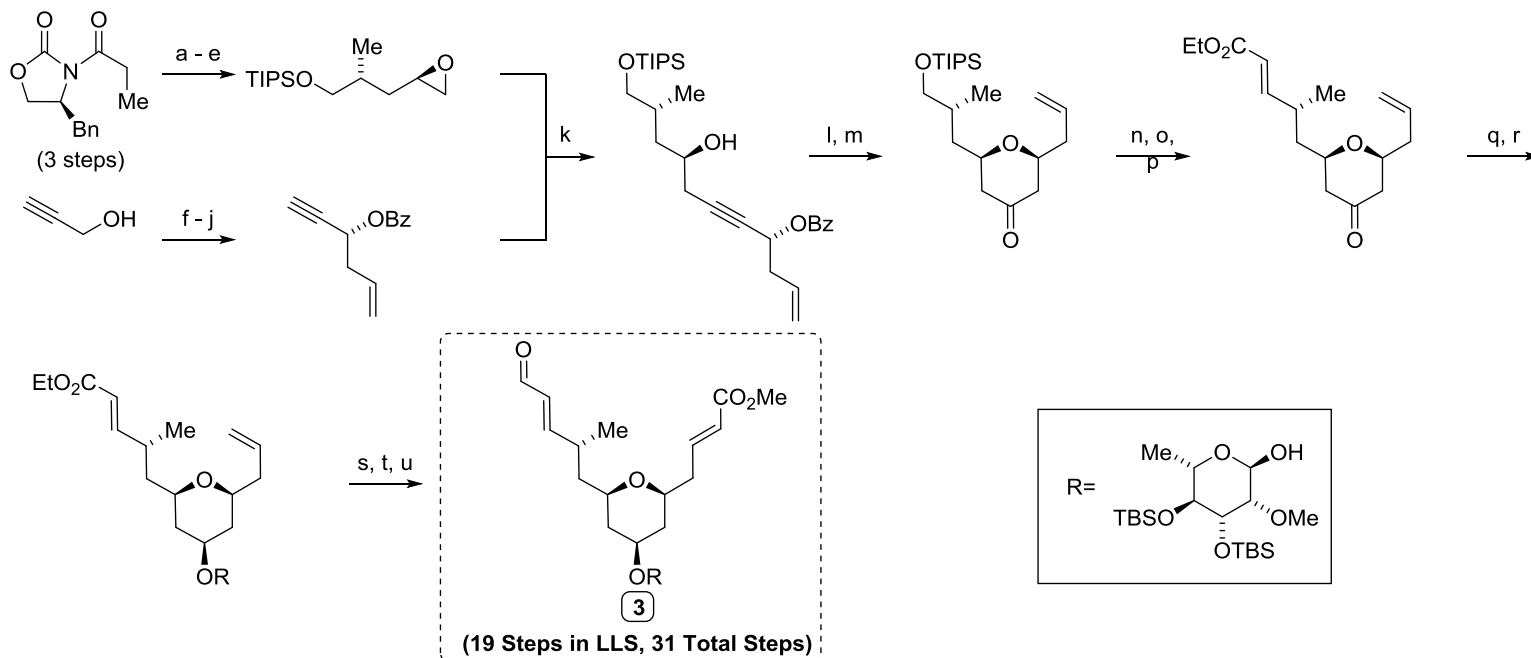

Key: a)  $\text{NaHMDS}$ , allyl iodide; b)  $\text{LiBH}_4$ ; c)  $\text{TIPSOTf}$ ,  $\text{Et}_3\text{N}$ ,  $\text{DMAP}$ ; d) *m*-CPBA; e) **A** (cat.),  $\text{HOAc}$ ,  $\text{H}_2\text{O}$ ; f) *n*-BuLi,  $\text{TMSCl}$ , then  $\text{HCl}$ ; g)  $\text{PCC}$ ; h)  $\text{Bu}_3\text{Sn}$ -allyl, (*R*)-BINOL,  $\text{Ti}(\text{O}-i\text{Pr})_4$ , 4 Å MS; i)  $\text{BzCl}$ ,  $\text{Et}_3\text{N}$ ,  $\text{DMAP}$ ; j)  $\text{TBAF}$ ; k) *n*-BuLi,  $\text{BF}_3\cdot\text{OEt}_2$ ; l)  $\text{AgBF}_4$  (cat.); m)  $\text{NaOMe}$ ; n)  $\text{TBAF}$ , o)  $\text{DMP}$ ,  $\text{NaHCO}_3$ ; p)  $\text{Ph}_3\text{P}=\text{CHCO}_2\text{Et}$ ; q)  $\text{NaBH}_4$ ; r) **2**,  $\text{TIPSOTf}$ , 4 Å MS; s)  $\text{DIBAL-H}$ ; t)  $\text{DMP}$ ,  $\text{NaHCO}_3$ , u) Grubbs II,  $\text{H}_2\text{C}=\text{CHCO}_2\text{Me}$ .

D. Carter *et al.* *J. Am. Chem. Soc.* **2016**, *138*, 770. (Cont'd)

### Fragment Union and End Game

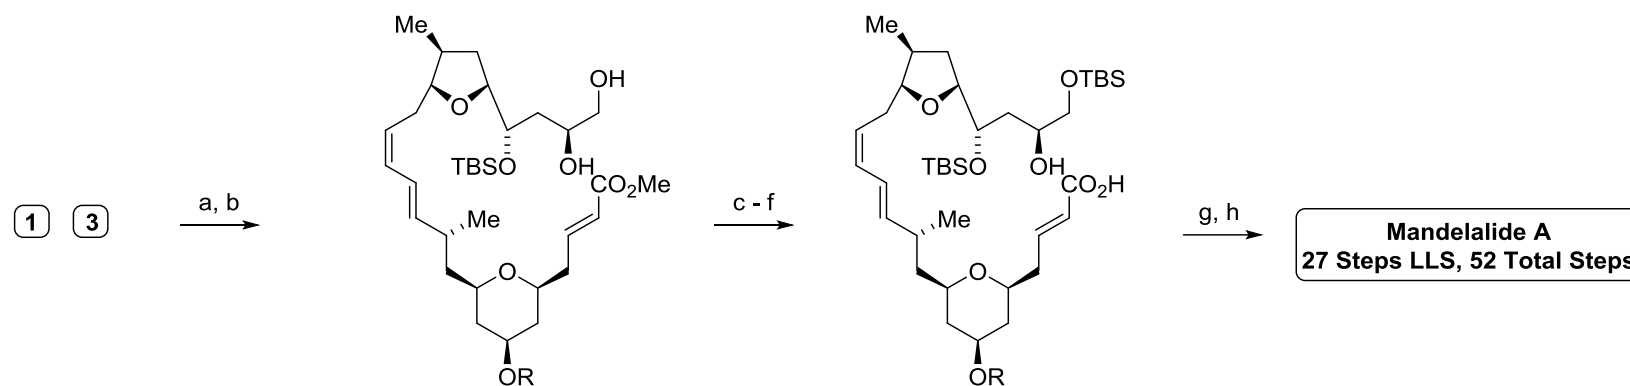

Key: a) NaHMDS; b) TFA; c) TBSOTf, 2,6-lutidine; d) DIBAL-H; e) MnO<sub>2</sub>; f) NaClO<sub>2</sub>; g) **B**, Et<sub>3</sub>N, DMAP; h) TASF.

E. Smith *et al.* *J. Am. Chem. Soc.* **2016**, *138*, 3675.

### Fragment 1

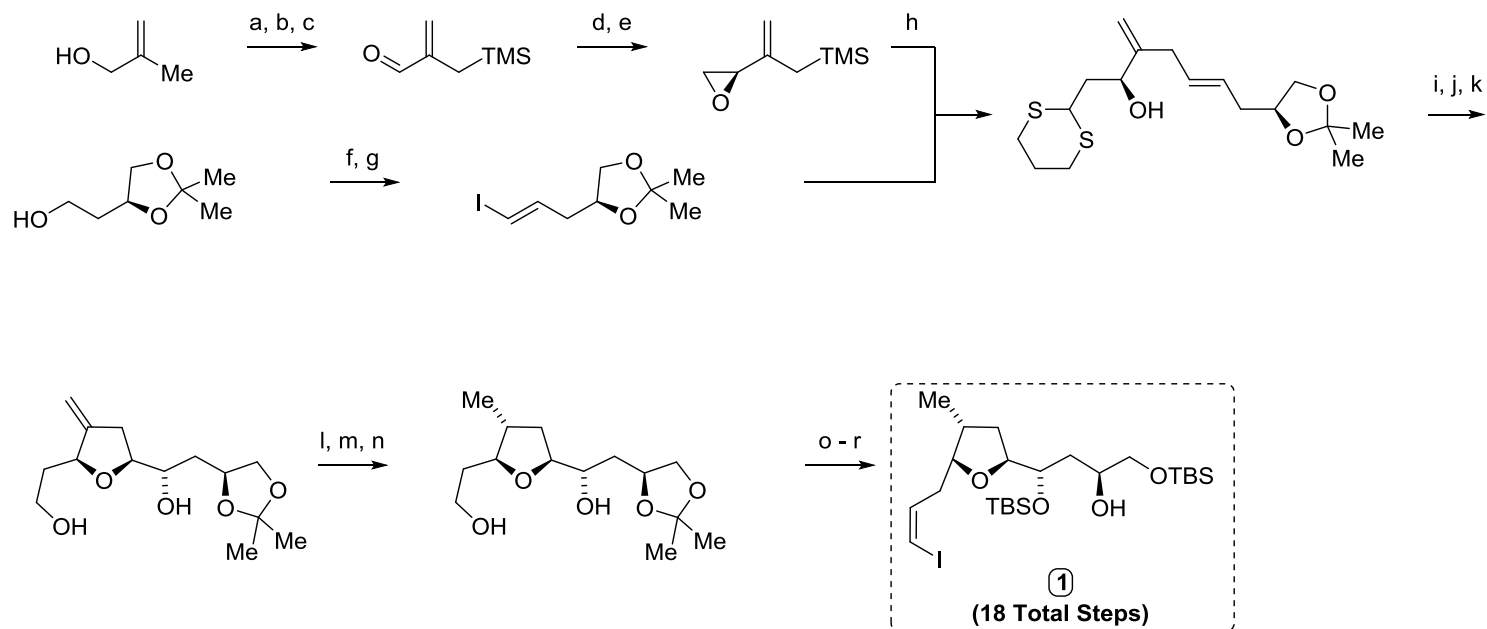

Key: a) *n*-BuLi, TMEDA, then TMSCl; b) H<sub>2</sub>SO<sub>4</sub>; c) MnO<sub>2</sub>; d) ICH<sub>2</sub>Cl, *n*-BuLi, TBAI; e) (*R,R*)-Jacobsen Catalyst, H<sub>2</sub>O (HKR); f) PCC, 4Å MS; g) CHI<sub>3</sub>, CrCl<sub>2</sub>; h) 1,3-dithiane, *n*-BuLi, then epoxide, HMPA then CuCN, vinyl iodide, then TBAF; i) MeI, CaCO<sub>3</sub>; j) NaBH<sub>4</sub>; k) K<sub>2</sub>OsO<sub>4</sub>, PNO, Cu(OTf)<sub>2</sub>, citric acid; l) TBSOTf, 2,6-lutidine; m) (Ph<sub>3</sub>P)<sub>3</sub>RhCl, H<sub>2</sub>; n) HF, pyridine; o) DMP; p) Ph<sub>3</sub>PCH<sub>2</sub>I<sub>2</sub>, NaHMDS; q) CeCl<sub>3</sub>·7H<sub>2</sub>O, (CO<sub>2</sub>H)<sub>2</sub>; r) TBSCl, imidazole.

E. Smith *et al.* *J. Am. Chem. Soc.* **2016**, *138*, 3675. (Cont'd)

### Fragment 2

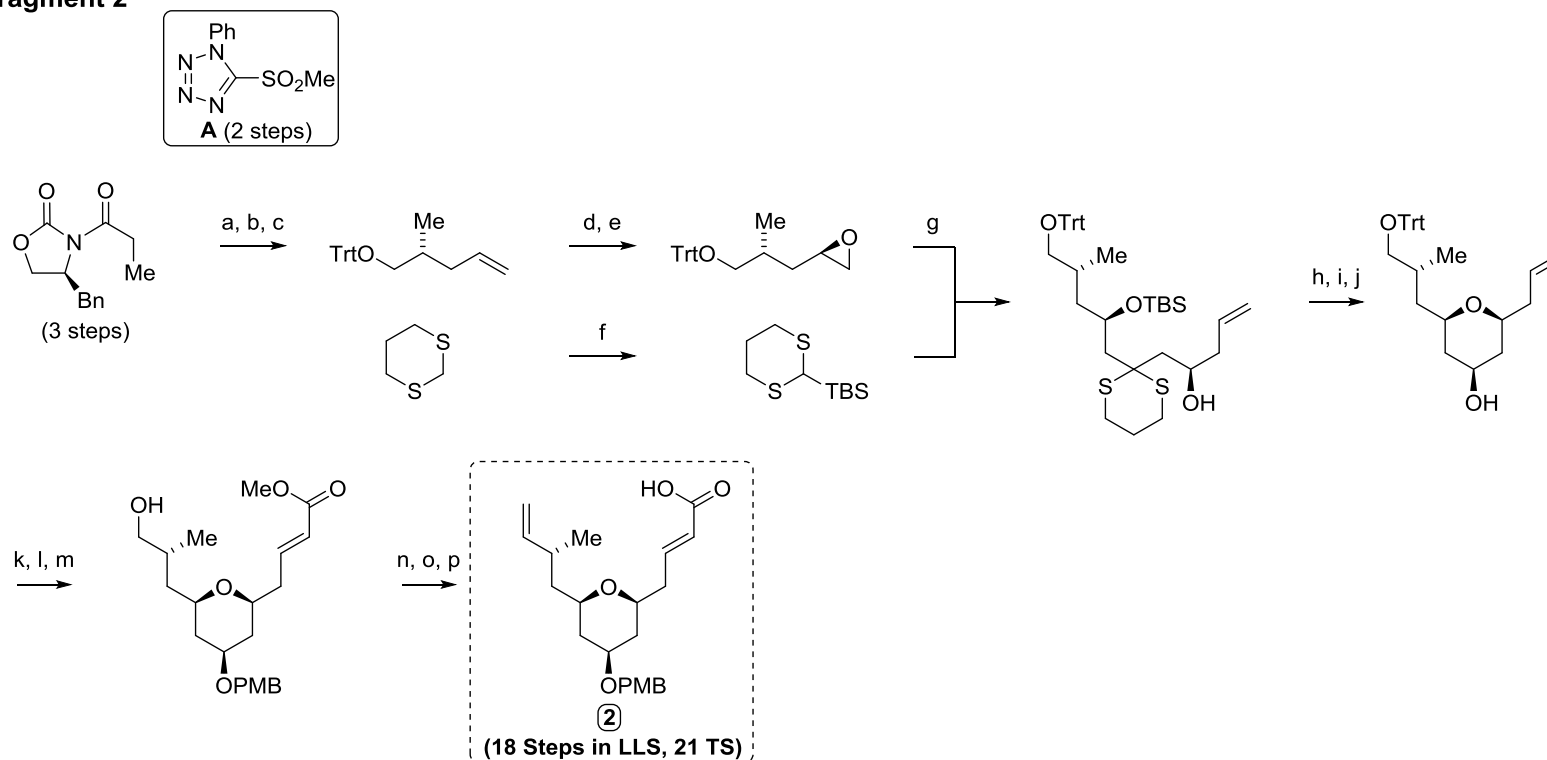

Key: a) NaHMDS, then allyl iodide; b) LiBH<sub>4</sub>; c) TrtCl, pyridine, DMAP; d) *m*-CPBA, Na<sub>2</sub>HPO<sub>4</sub>; e) (*R,R*)-Jacobsen Catalyst, H<sub>2</sub>O (HKR); f) *n*-BuLi, TBSCl; g) *n*-BuLi, then epoxide, then HMPA, then (*S*)-epichlorohydrin, then vinyl-MgBr, CuI; h) MsCl, Et<sub>3</sub>N, then TBAF; i) MeI, CaCO<sub>3</sub>; j) NaBH<sub>4</sub>; k) PMPBr; l) PPTS; m) methyl acrylate, Grubbs II; n) DMP, o) sulfone **A**; p) LiOH.

### Fragment 3

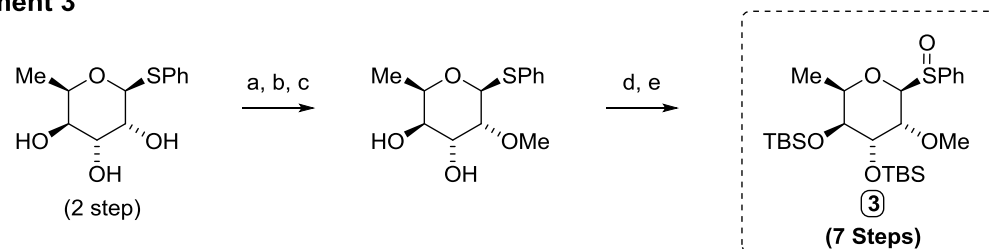

Key: a) HC(OMe)<sub>3</sub>, 2,2,3,3-(OMe)<sub>4</sub>-butane, CSA; b) NaH, MeI; c) TFA; d) TBSOTf, 2,6-lutidine; e) *m*-CPBA.



E. Smith *et al.* *J. Am. Chem. Soc.* **2016**, *138*, 3675. (Cont'd)

### Fragment Union and End Game

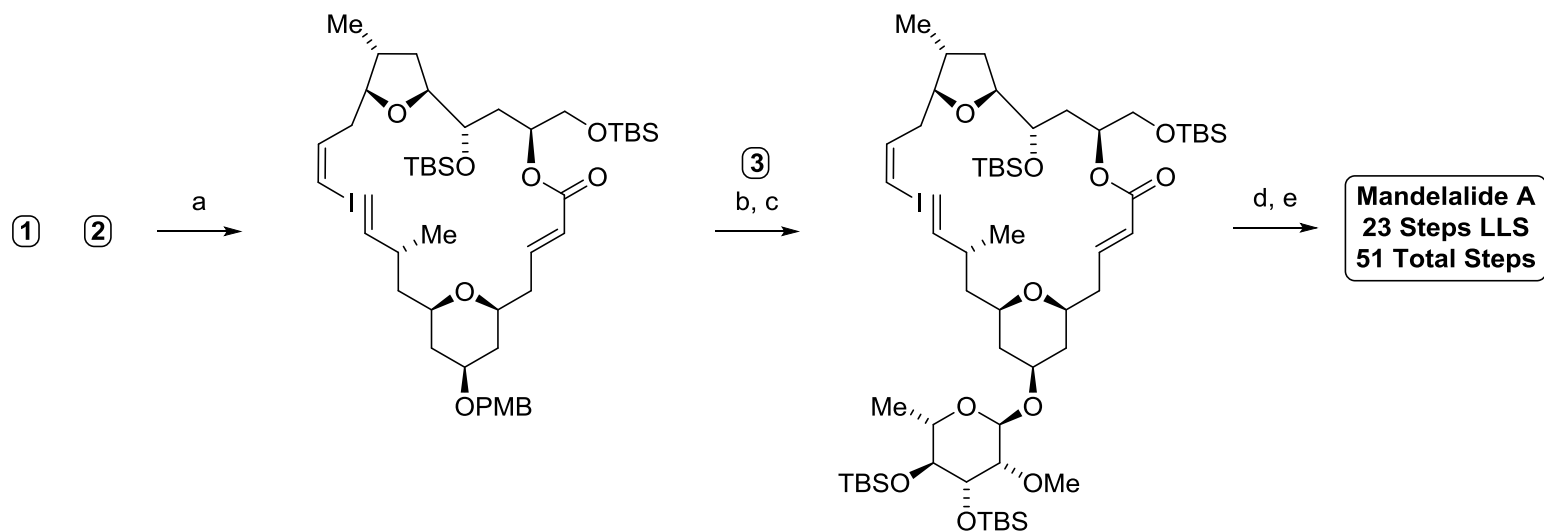

Key: a) 2,4,6-(Cl)<sub>3</sub>BzCl, Et<sub>3</sub>N, DMAP; b) DDQ; c) **3**, Tf<sub>2</sub>O, 4 Å MS, 2,6-(*t*-Bu)<sub>2</sub>-pyridine; d) Pd(OAc)<sub>2</sub>, Cs<sub>2</sub>CO<sub>3</sub>, Et<sub>3</sub>N; e) HF-pyr.

## Graphical Summary of Previous Syntheses of Oridamycins

A. Li *et al.* *Nat. Commun.* **2015**, *6*, 6096. (racemic)

### Fragment 1

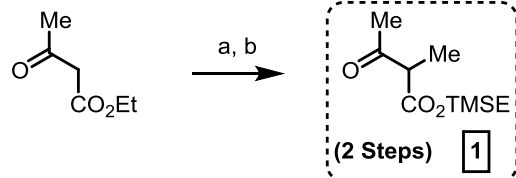

### Fragment 2

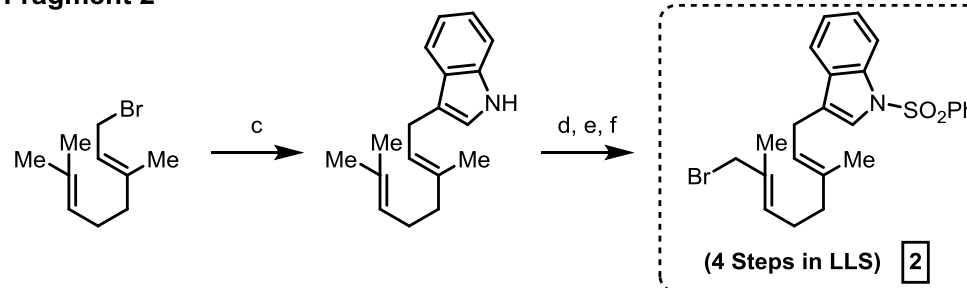

Key: (a) TMSEOH; (b) MeI, K<sub>2</sub>CO<sub>3</sub>; (c) Indole, NH<sub>4</sub>HCO<sub>3</sub>; (d) PhSO<sub>2</sub>Cl, TBAB, NaOH; (e) SeO<sub>2</sub>, TBHP; (f) MsCl, Et<sub>3</sub>N, LiBr.

### Fragment Union and End Game

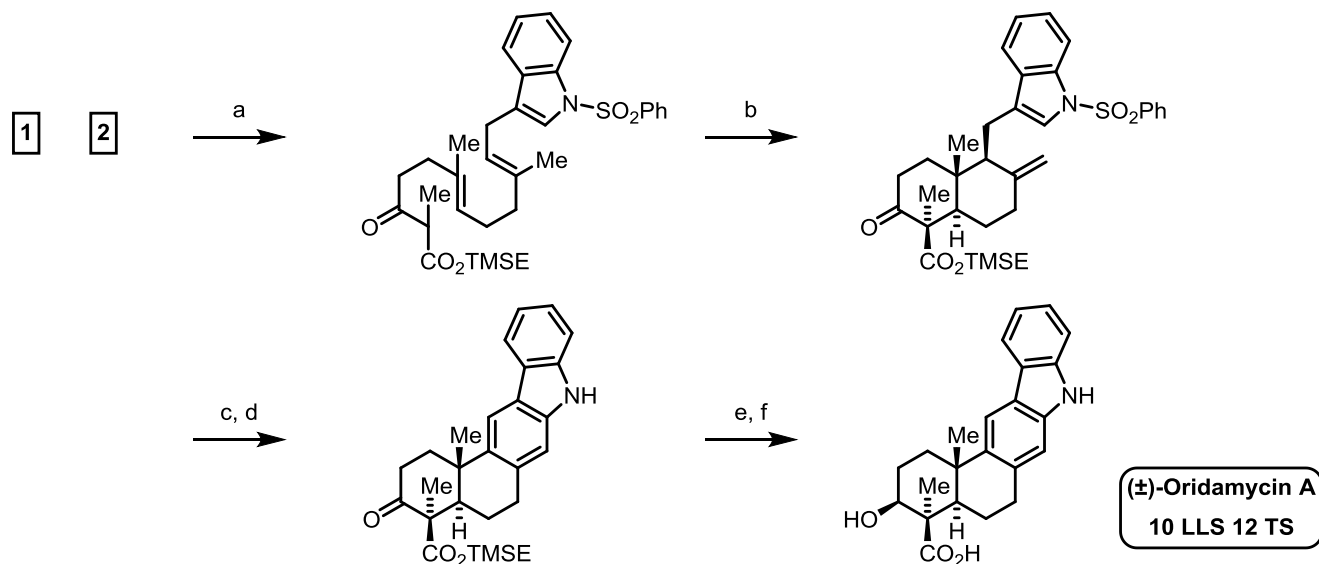

Key: (a) KH, then *n*BuLi, HMPA; (b) Mn(OAc)<sub>3</sub>·3H<sub>2</sub>O, Cu(OAc)<sub>2</sub>·2H<sub>2</sub>O; (c) Mg, NH<sub>4</sub>Cl; (d) Pd(OAc)<sub>2</sub>, 1,4-benzoquinone; (e) NaBH<sub>4</sub>, CeCl<sub>3</sub>·7H<sub>2</sub>O; (f) TASF.

B. Trotta *Org. Lett.* **2015**, *17*, 3358. (racemic)

### Fragment 1

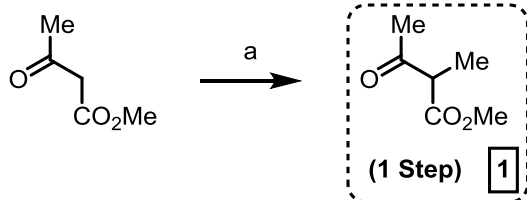

### Fragment 2

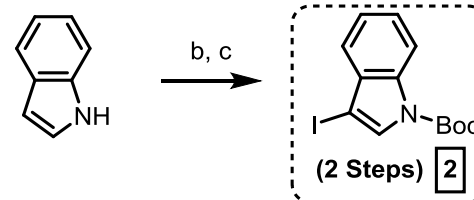

Key: (a) MeI, K<sub>2</sub>CO<sub>3</sub>; (b) KOH, I<sub>2</sub>; (c) Boc<sub>2</sub>O, Et<sub>3</sub>N, DMAP.

### Fragment Union and End Game

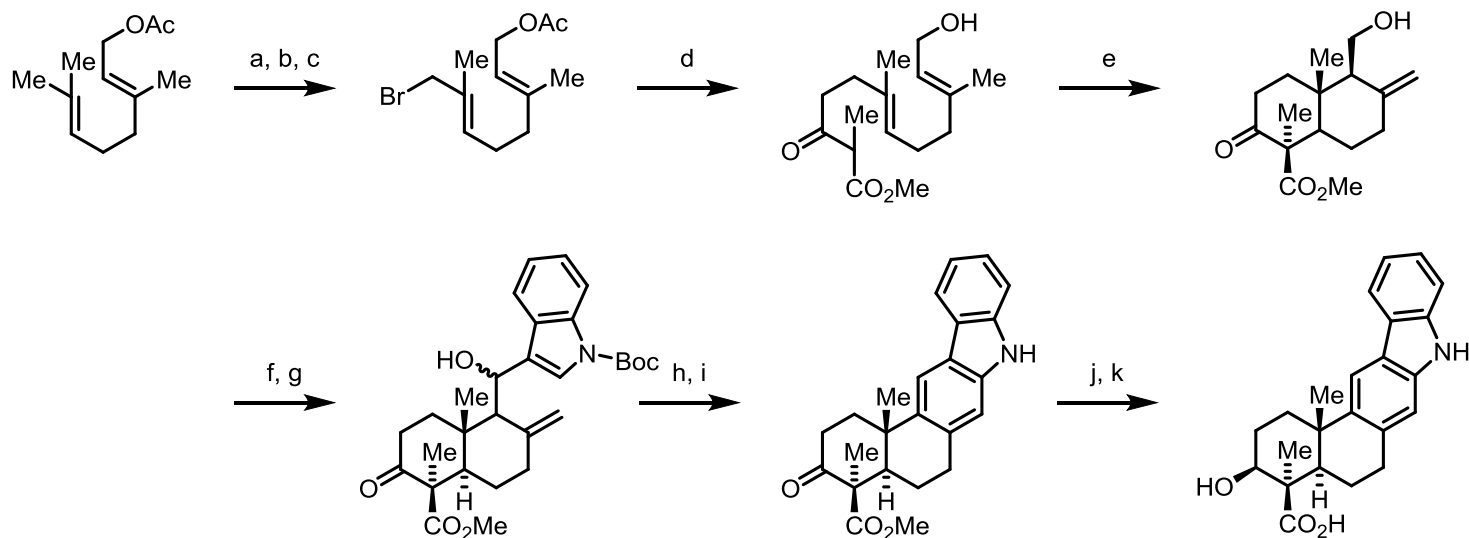

Key: (a) SeO<sub>2</sub>; (b) NaBH<sub>4</sub>; (c) MsCl, Et<sub>3</sub>N, LiBr; (d) **1**, NaH, then *n*BuLi, HMPA; (e) Mn(OAc)<sub>3</sub>•3H<sub>2</sub>O, Cu(OAc)<sub>2</sub>•2H<sub>2</sub>O; (f) DMP; (g) **2**, EtMgBr; (h) TFA; (i) Air, then TFA; (j) NaBH<sub>4</sub>; (k) NaCN.

(±)-Oridamycin A  
11 LLS 14 TS

C. Li *et al.* *Nat. Commun.* **2015**, *6*, 6096. (racemic)

### Fragment 1

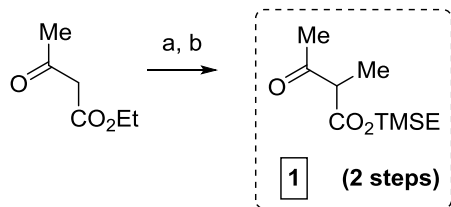

Key: a) TMSEOH; b) MeI, K<sub>2</sub>CO<sub>3</sub>.

### Completion of Synthesis

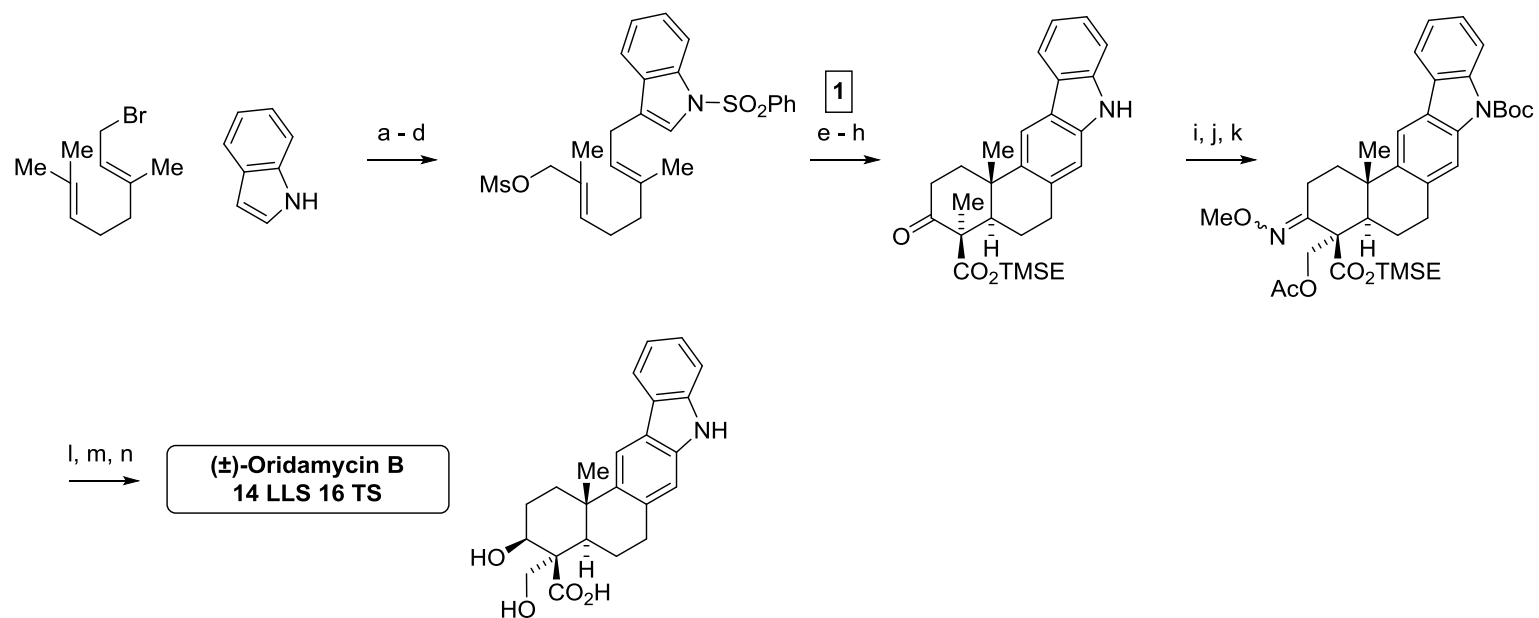

Key: a) NH<sub>4</sub>HCO<sub>3</sub>; b) PhSO<sub>2</sub>Cl, TBAB, NaOH; c) SeO<sub>2</sub>, TBHP; d) MsCl, NEt<sub>3</sub>, LiBr; e) **1**, KH, then *n*-BuLi; f) Mn(OAc)<sub>3</sub>·2H<sub>2</sub>O, Cu(OAc)<sub>2</sub>·H<sub>2</sub>O; g) Mg, NH<sub>4</sub>Cl; h) Pd(OAc)<sub>2</sub>, benzoquinone; i) NH<sub>2</sub>OMe; j) Boc<sub>2</sub>O, DMAP; k) Pd(OAc)<sub>2</sub>, PhI(OAc)<sub>2</sub>; l) HClO<sub>4</sub>; m) NaBH<sub>4</sub>; n) TASF.

D. Trotta *Org. Lett.* **2015**, *17*, 3358. (racemic)

### Fragments 1

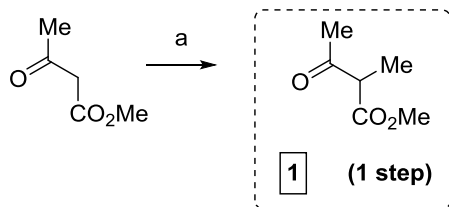

Key: a) MeI, K<sub>2</sub>CO<sub>3</sub>.

### Fragments 2

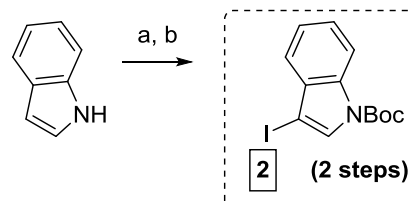

Key: a) KOH, I<sub>2</sub>; b) Boc<sub>2</sub>O, Et<sub>3</sub>N, DMAP.

### Completion of Synthesis

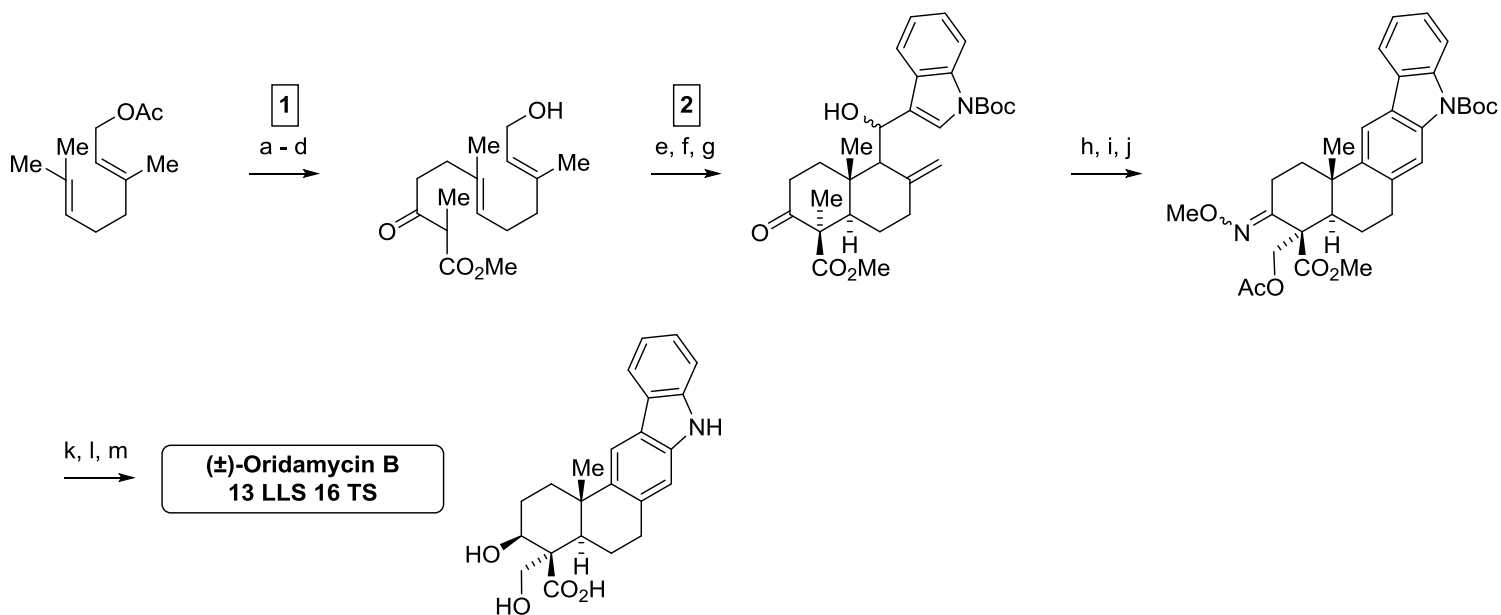

Key: a) SeO<sub>2</sub>; b) NaBH<sub>4</sub>; c) MsCl, NEt<sub>3</sub>, then LiBr; d) **1**, NaH, then *n*-BuLi; e) Mn(OAc)<sub>2</sub>, Cu(OAc)<sub>2</sub>; f) DMP; g) **2**, EtMgBr; h) TFA; i) MeONH<sub>2</sub>-HCl, pyridine; j) Pd(OAc)<sub>2</sub>, PhI(OAc)<sub>2</sub>; k) HCl; l) NaBH<sub>4</sub>; m) NaCN.

## Graphical Summary of Previous Syntheses of Xiamycin A

A. Baran *et al.* *J. Am. Chem. Soc.* **2014**, *136*, 5571.

### Fragment 1

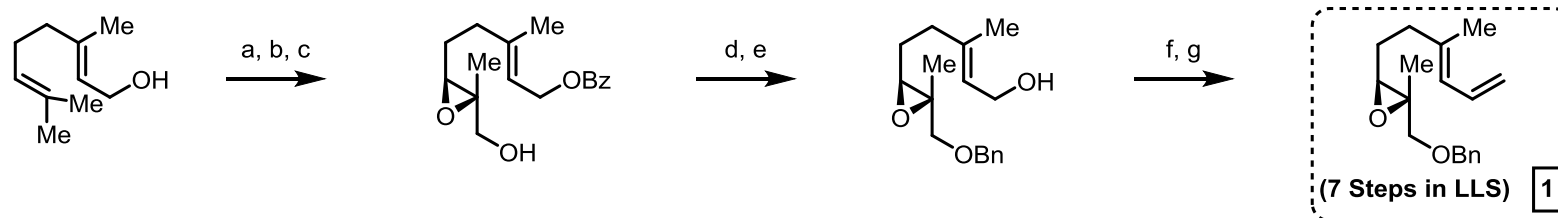

Key: (a) BzCl, py, DMAP; (b) SeO<sub>2</sub>, TBHP; (c) (+)-DIPT, Ti(O*i*Pr)<sub>4</sub>, TBHP, 3A MS; (d) BnBr, NaH, TBAI; (e) NaOMe, TBAI; (f) SO<sub>3</sub>•py, Et<sub>3</sub>N; (g) Ph<sub>3</sub>PMel, *n*BuLi.

### Fragment Union and End Game

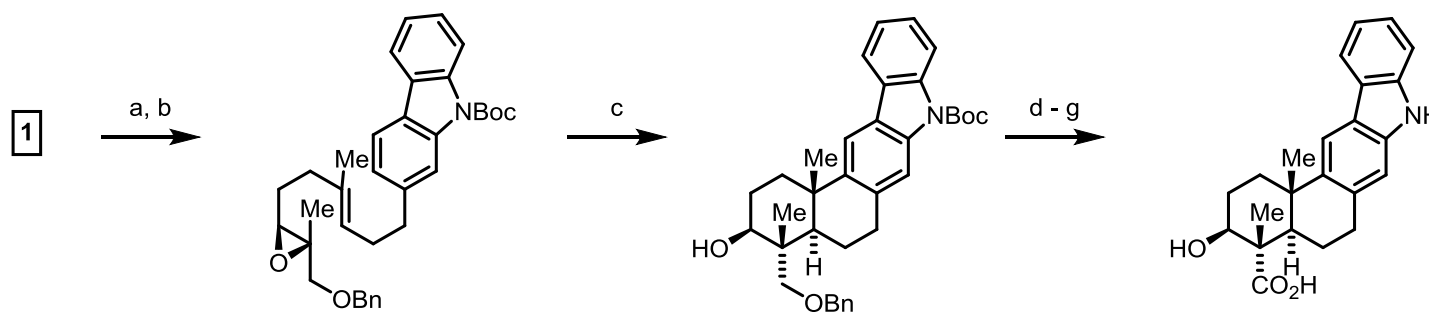

Key: (a) 1, 9-BBN, then 2-bromo-9H-carbazole, Pd(dppf)Cl<sub>2</sub>, NaOH; (b) Boc<sub>2</sub>O, Et<sub>3</sub>N, DMAP; (c) BF<sub>3</sub>•OEt<sub>2</sub>; (d) H<sub>2</sub>, Pd(OH)<sub>2</sub>/C; (e) TEMPO, NCS, TBAI, NaHCO<sub>3</sub>/KHCO<sub>3</sub>; (f) NaClO<sub>2</sub>, NaH<sub>2</sub>PO<sub>4</sub>•H<sub>2</sub>O, 2-methyl-2-butene; (g) EtOH, H<sub>2</sub>O.

**Xiamycin A**  
14 LLS 14 TS

B. Li *et al.* *Nat. Commun.* 2015, 6, 6096.

### Fragment 1

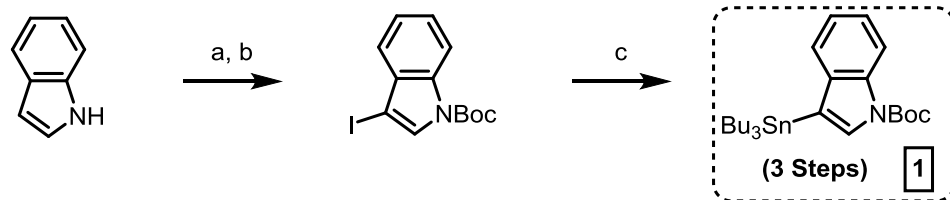

Key: (a) ICl, py; (b)  $\text{Boc}_2\text{O}$ , DMAP; (c)  $n\text{BuLi}$ , TMEDA, then  $\text{Bu}_3\text{SnCl}$ .

### Completion of Synthesis

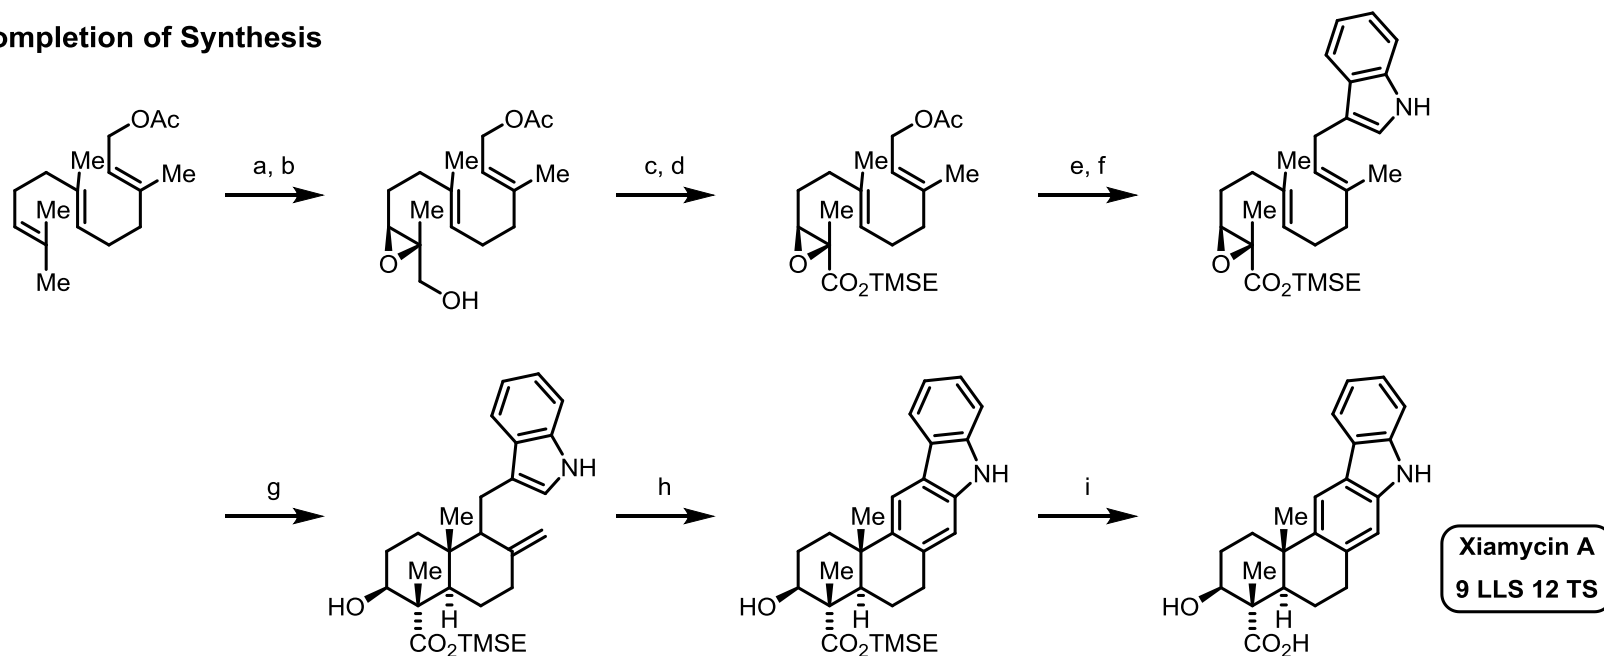

Key: (a)  $\text{SeO}_2$ , TBHP; (b) (+)-DET,  $\text{Ti}(\text{O}i\text{Pr})_4$ , TBHP; (c) AZADO,  $\text{PhI}(\text{OAc})_2$ ; (d) TMSEOH, EDC·HCl; (e) **1**,  $\text{Pd}_2(\text{dba})_3$ , LiCl; (f) DMSO, 150 °C; (g)  $\text{Cp}_2\text{TiCl}_2$ , Mn, DIPEA, TMSCl; (h)  $\text{Pd}(\text{OAc})_2$ , 1,4-benzoquinone, AcOH; (i) TASF.

## Graphical Summary of Previous Syntheses of Triene-Containing C17-Benzene Ansamycins

A. Smith *et al.* *J. Am. Chem. Soc.* **1995**, *117*, 10777; *J. Am. Chem. Soc.* **1996**, *118*, 8308; *Tetrahedron Lett.* **1991**, *32*, 1627.

### Fragment 1

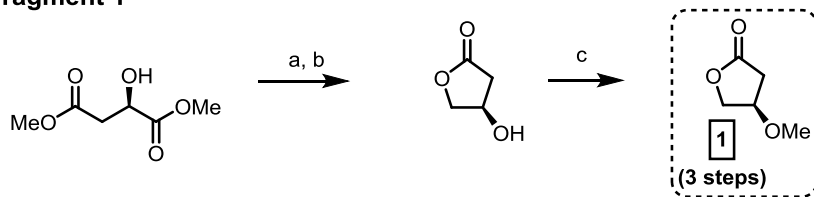

Key: (a)  $\text{BH}_3 \cdot \text{Me}_2\text{S}$ ,  $\text{NaBH}_4$ ; (b)  $\text{CF}_3\text{CO}_2\text{H}$ ; (c)  $\text{Ag}_2\text{O}$ ,  $\text{MeI}$ .

### Fragment 2

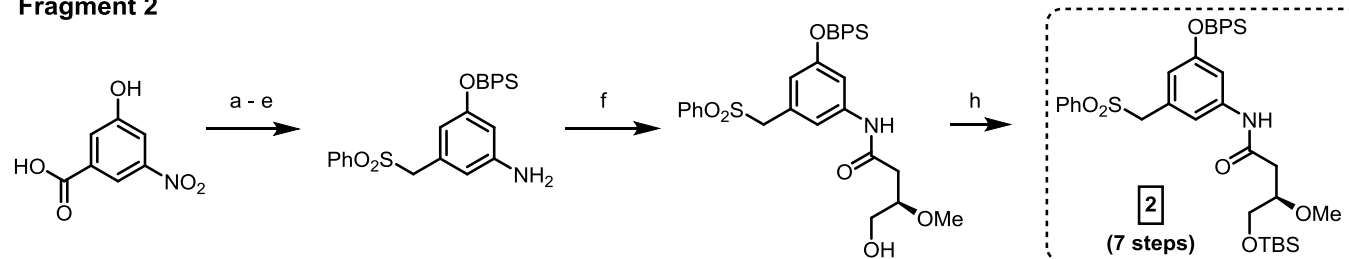

Key: (a)  $\text{BH}_3$ ; (b)  $\text{CBr}_4$ ,  $\text{PPh}_3$ ; (c)  $\text{PhSO}_2\text{Na}$ ; (d)  $\text{BPSCl}$ ; (e)  $\text{H}_2$ ,  $\text{Pd/C}$ ; (f)  $\text{AlMe}_3$ , **1**; (h)  $\text{TBSCl}$ .

### Fragment 3

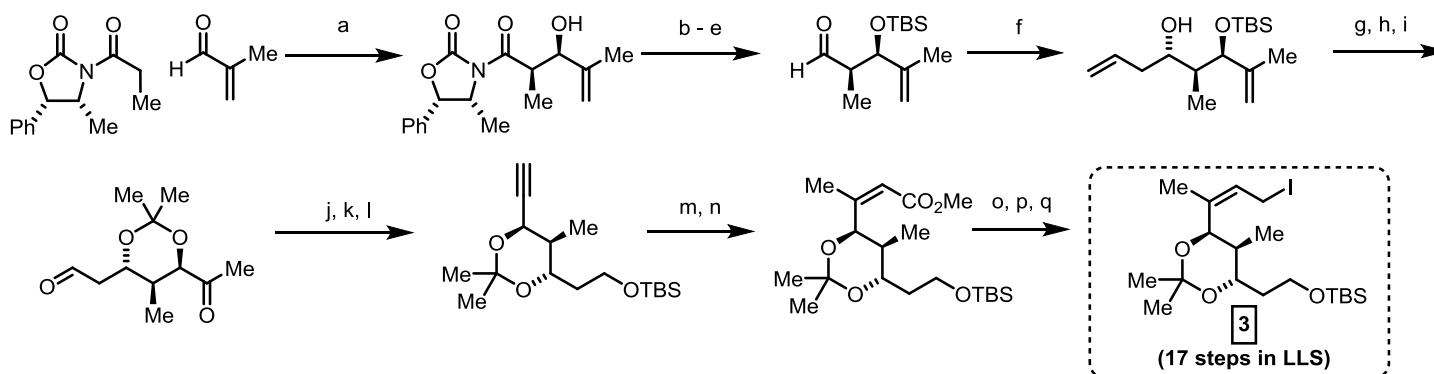

Key: (a) *n*- $\text{Bu}_2\text{BOTf}$ ,  $\text{NEt}_3$ ; (b)  $\text{TBSOTf}$ ; (c)  $\text{LiOOH}$ ; (d)  $\text{CDI}$ ,  $\text{MeO}(\text{Me})\text{NH} \cdot \text{HCl}$ ; (e)  $\text{DIBAL-H}$ ; (f) (-)-*B*-allyl(diisopinocampheyl)-borane; (g)  $\text{TBAF}$ ; (h)  $\text{Me}_2\text{C}(\text{OMe})_2$ ,  $\text{PTSA}$ ; (i)  $\text{O}_3$ ,  $\text{PPh}_3$ ; (j)  $\text{LiAl}[\text{OC}(\text{Et}_3)]_3\text{H}$ ; (k)  $\text{TBSCl}$ ; (l)  $\text{NaHMDS}$ ,  $\text{ClPO}(\text{Et})_2$ , *t*- $\text{BuLi}$ ; (m) *t*- $\text{BuLi}$ ,  $\text{ClCO}_2\text{Me}$ ; (n)  $\text{Me}_2\text{CuLi}$ ; (o)  $\text{DIBAL-H}$ ; (p)  $\text{MsCl}$ ,  $\text{LiCl}$ ; (q)  $\text{NaI}$ .



A. Smith *et al.* *J. Am. Chem. Soc.* **1995**, *117*, 10777; *J. Am. Chem. Soc.* **1996**, *118*, 8308; *Tetrahedron Lett.* **1991**, *32*, 1627. (Cont'd)

### Fragment Union

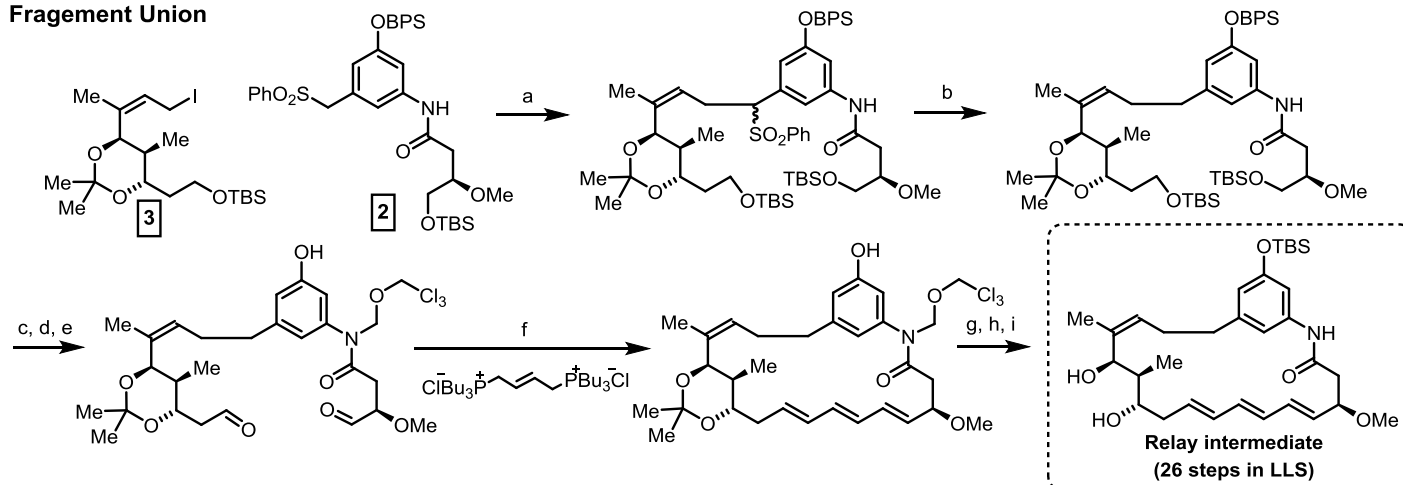

### Trienomycin F End Game

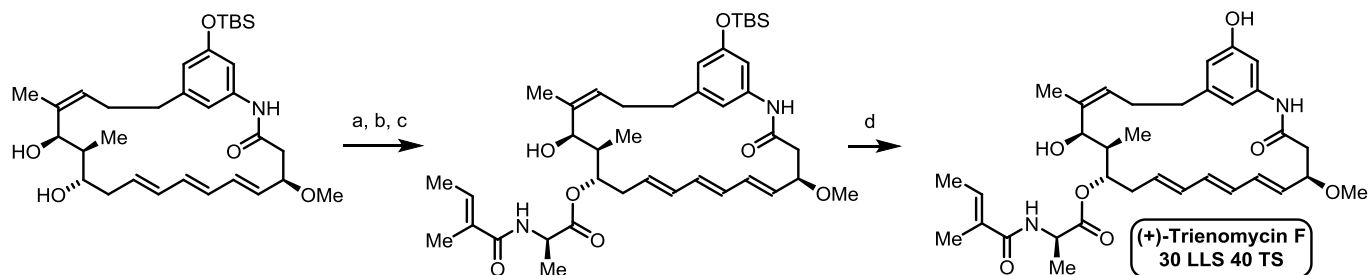

### Trienomycin A End Game (Smith, *J. Am. Chem. Soc.* **1996**, *118*, 8308.)

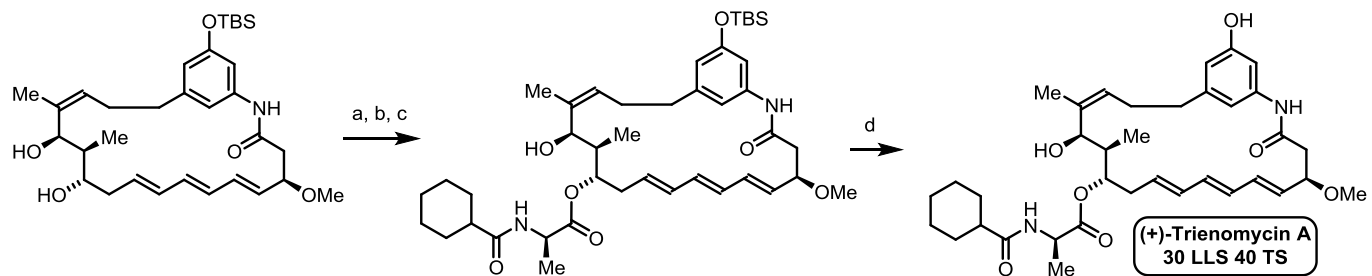

B. Smith *et al.* *Org. Lett.* **1999**, *1*, 1491.

### Fragment 1

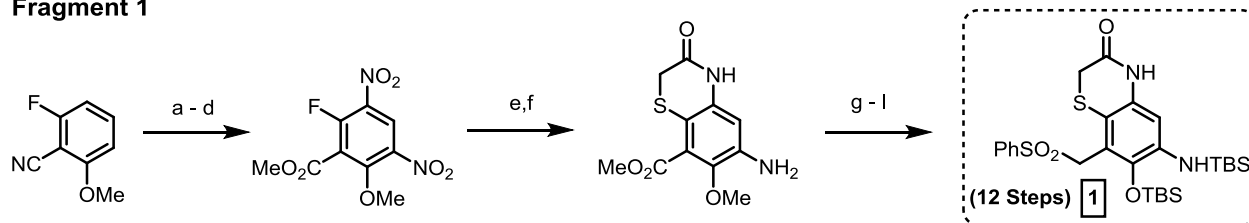

Key: (a) DIBAL-H; (b)  $\text{KMnO}_4$ ; (c)  $\text{CH}_3\text{OH}$ ; (d)  $\text{NO}_2\text{BF}_4$ ; (e)  $\text{LiSCH}_2\text{CO}_2\text{Me}$ ; (f)  $\text{SnCl}_2$ , 1N HCl; (g) CbzCl; (h)  $\text{LiHBEt}_3$ ; (i) TsCl, DMAP; (j)  $\text{PhSO}_2\text{Na}$ , NaI; (k)  $\text{BBr}_3$ , (l) TBSOTf.

### Fragment 2

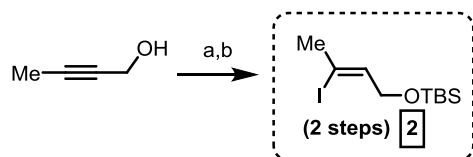

Key: (a) LAH,  $\text{I}_2$ ; (b) TBSCl,  $\text{NEt}_3$ .

### Fragment 3

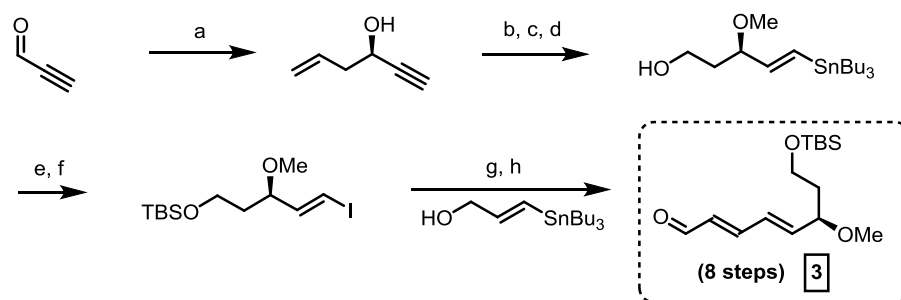

Key: (a) (-)-B-allyl(diisopinocampheyl)-borane (b) MeI, *n*-BuLi; (c)  $\text{O}_3$ ,  $\text{PPh}_3$ ; (d)  $\text{Bu}_3\text{SnH}$ , AIBN; (e) TBSOTf; (f)  $\text{I}_2$ ; (g)  $\text{Pd}(\text{CH}_3\text{CN})_2\text{Cl}_2$ ; (h)  $\text{COCl}_2$ , DMSO,  $\text{NEt}_3$ .

### Fragment 4

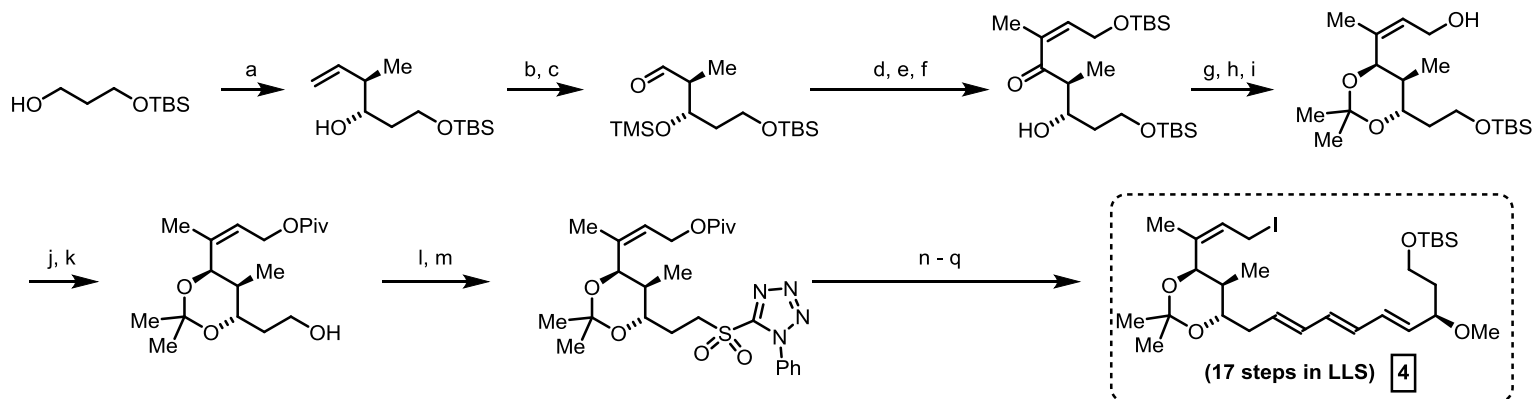

Key: (a) Brown crotylation (b) TMSOTf; (c)  $\text{O}_3$ ,  $\text{PPh}_3$ ; (d) *t*-BuLi, **2**; (e)  $\text{K}_2\text{CO}_3$ , MeOH; (f)  $\text{MnO}_4$ ; (g)  $(\text{CH}_3)_4\text{NBH}(\text{OAc})_3$ ; (h)  $\text{Me}_2\text{C}(\text{OMe})_2$ ; (i) NaOH; (j) PivCl; (k) TBAF; (l) 5-Mercapto-1-phenyltetrazole,  $\text{PPh}_3$ , DEAD; (m)  $\text{H}_2\text{O}_2$ ;  $(\text{NH}_4)_6\text{Mo}_7\text{O}_{24} \cdot 4\text{H}_2\text{O}$ ; (n) KHMDS, **3**; (o) DIBAL-H; (p) MsCl, LiCl; (q) NaI.

B. Smith *et al.* *Org. Lett.* **1999**, *1*, 1491. (Cont'd)

### Fragment Union

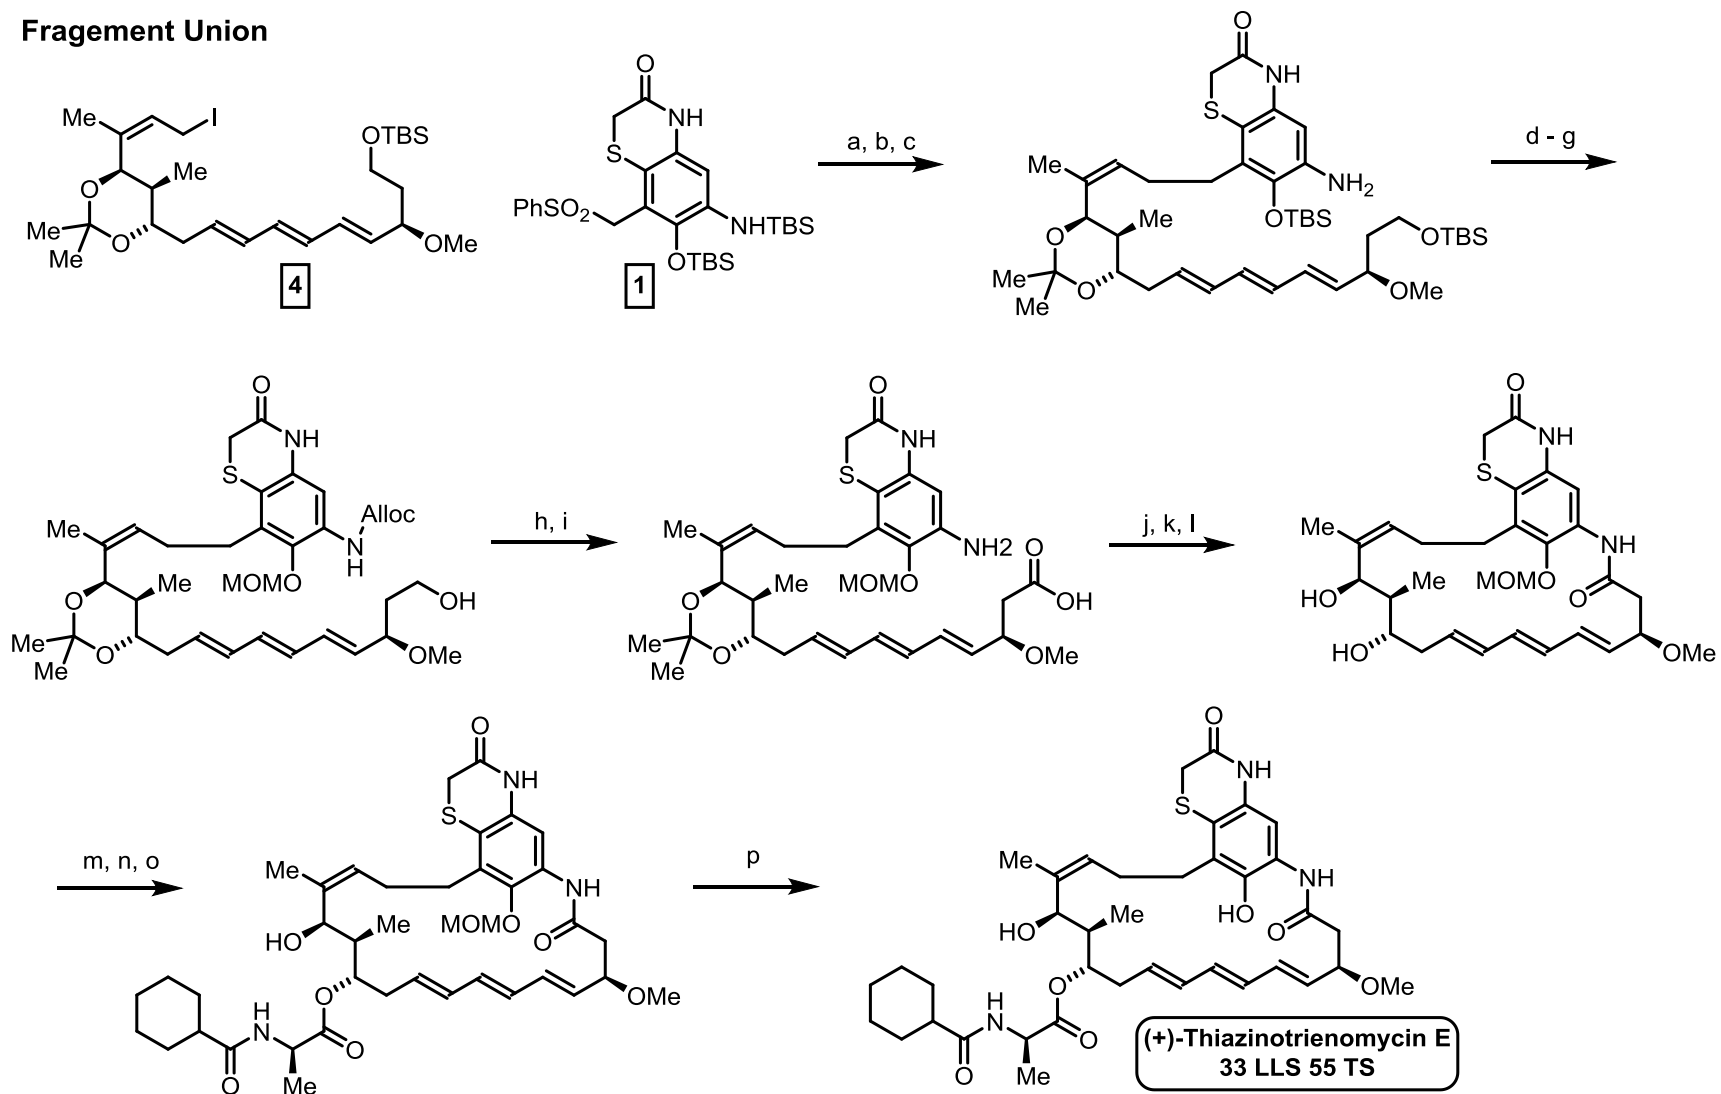

Key: (a) NaHMDS; (b) Na(Hg); (c) SiO<sub>2</sub>, CHCl<sub>3</sub>; (d) AllocCl; (e) TBAF-HOAc; (f) MOMCl; (g) TBAF; (h) Py·SO<sub>3</sub>; (i) NaClO<sub>2</sub>; (j) Pd(PPh<sub>3</sub>)<sub>4</sub>, Dimedone; (k) Mukaiyama Salt, NEt<sub>3</sub>; (l) CSA; (m) (Fmoc-D-Ala)<sub>2</sub>O, DMAP; (n) Et<sub>2</sub>NH; (o) BOP, NEt<sub>3</sub>, cyclohexanecarboxylic acid; (p) 3N HCl.

C. Panek *et al.* *J. Am. Chem. Soc.* **1998**, *120*, 4123.

### Fragment 1

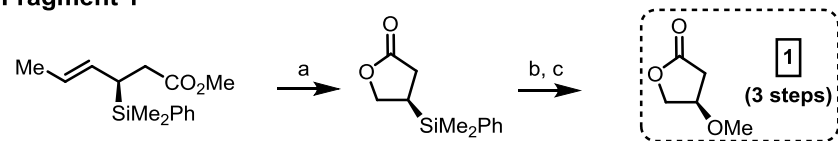

Key: (a)  $\text{O}_3$ ,  $\text{NaBH}_4$ ; (b)  $\text{Hg}(\text{OAc})_2$ ,  $\text{CH}_3\text{CO}_3\text{H}$ ; (c)  $\text{Ag}_2\text{O}$ ,  $\text{MeI}$ .

### Fragment 2

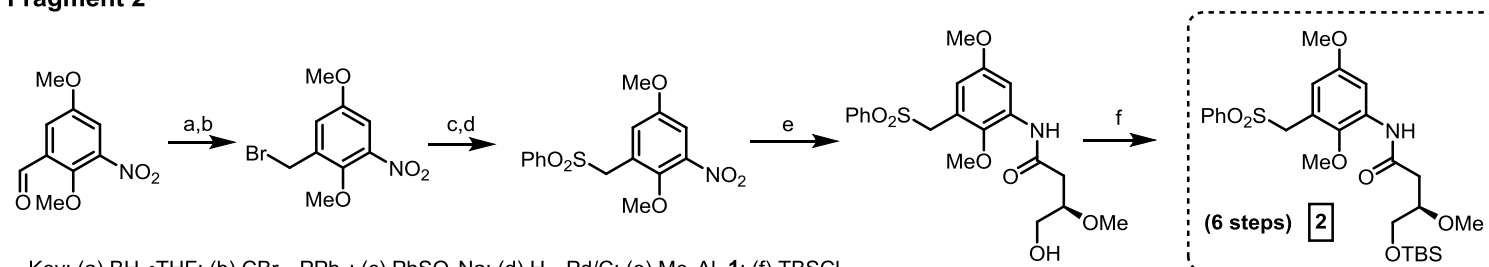

Key: (a)  $\text{BH}_3 \cdot \text{THF}$ ; (b)  $\text{CBr}_4$ ,  $\text{PPh}_3$ ; (c)  $\text{PhSO}_2\text{Na}$ ; (d)  $\text{H}_2$ ,  $\text{Pd/C}$ ; (e)  $\text{Me}_3\text{Al}$ , **1**; (f)  $\text{TBSCl}$ .

### Fragment 3

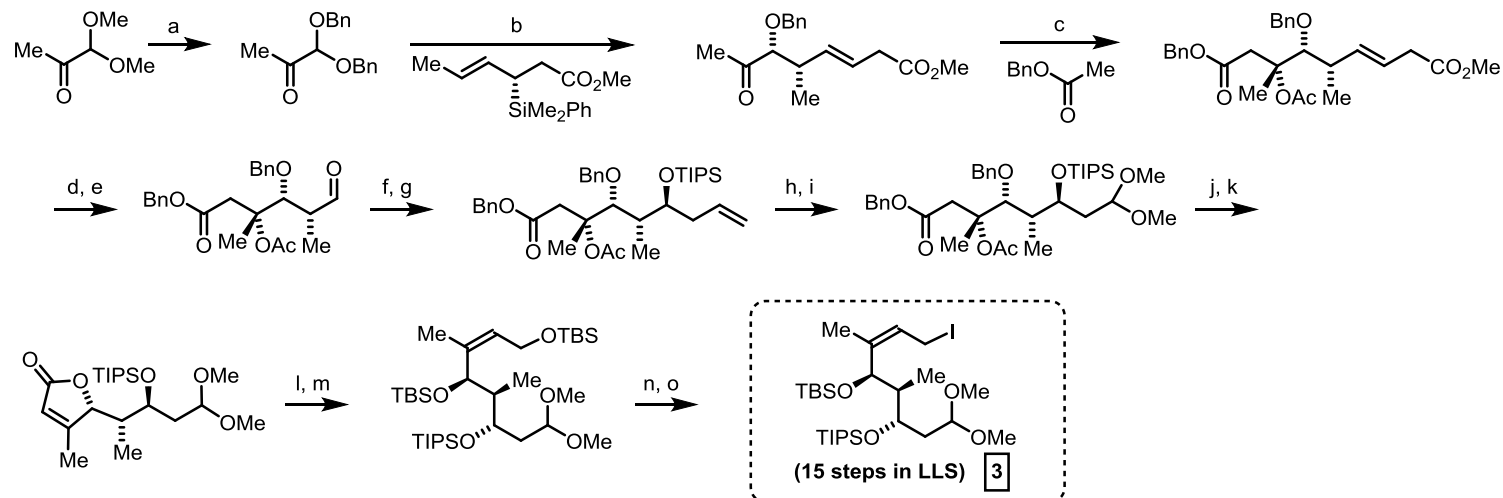

Key: (a) benzyl alcohol,  $\text{PTSA}$ ; (b) cat.  $\text{TMSOTf}$ ; (c)  $\text{LiHMDS}$ ; (d)  $\text{Ac}_2\text{O}$ ,  $\text{NEt}_3$ ,  $\text{DMAP}$ ; (e)  $\text{O}_3$ ,  $\text{Me}_2\text{S}$ ; (f)  $\text{TiCl}_4$ , allyltrimethylsilane; (g)  $\text{TIPSOTf}$ ; (h)  $\text{O}_3$ ,  $\text{Me}_2\text{S}$ ; (i)  $\text{MeOH}$ ; (j)  $\text{H}_2$ ,  $\text{Pd/C}$ ; (k)  $\text{DBU}$ ; (l)  $\text{LiAH}$ ,  $\text{TMEDA}$ ; (m)  $\text{TBSOTf}$ ; (n)  $\text{HF} \cdot \text{Pyr}$ ; (o)  $\text{Me}(\text{PhO})_3\text{PI}$ .

C. Panek *et al.* *J. Am. Chem. Soc.* **1998**, *120*, 4123. (Cont'd)

### Fragment 4

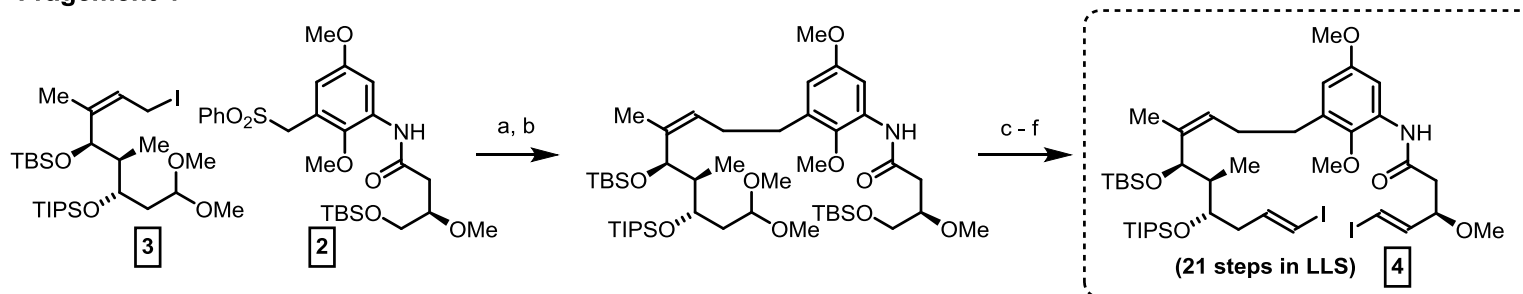

Key: (a) LiHMDS; (b) Na(Hg), Na<sub>2</sub>HPO<sub>4</sub>; (c) HF•Pyr; (d) Pyr•SO<sub>3</sub>, DMSO; (e) PPTS, Acetone; (f) CrCl<sub>2</sub>, CHI<sub>3</sub>.

### Mycotrienol End Game

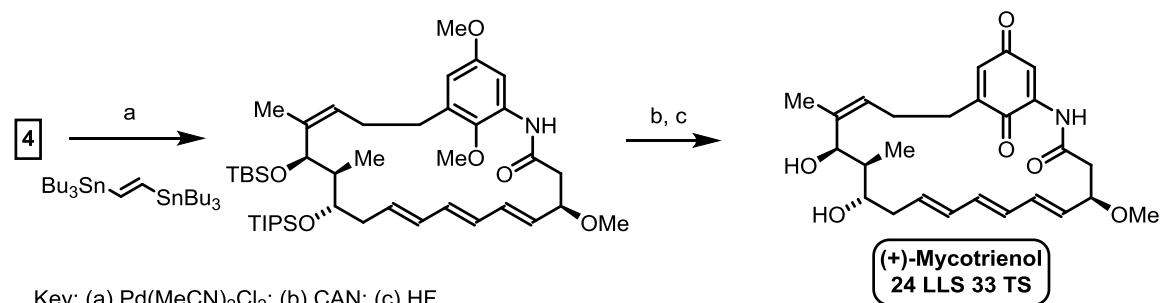

Key: (a) Pd(MeCN)<sub>2</sub>Cl<sub>2</sub>; (b) CAN; (c) HF.

### Mycotrienin I End Game

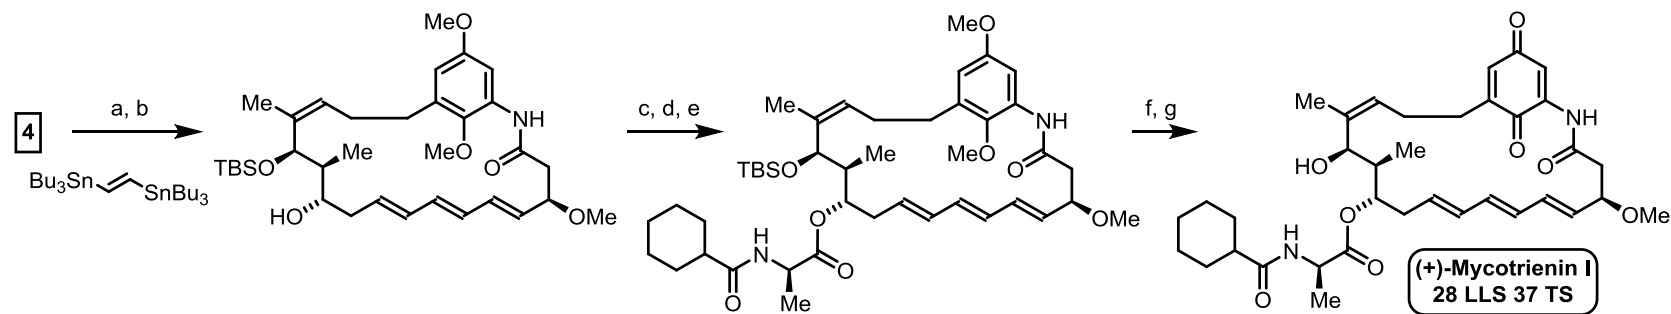

Key: (a) Pd(MeCN)<sub>2</sub>Cl<sub>2</sub>; (b) MeOH, PTSA; (c) (Fmoc-D-Ala)<sub>2</sub>O; (d) Et<sub>2</sub>NH; (e) BOP, NEt<sub>3</sub>, cyclohexanecarboxylic acid; (f) CAN; (g) HF.

D. Hayashi *et al. Angew. Chem. Int. Ed.* **2008**, *47*, 6657.

### Fragment 1

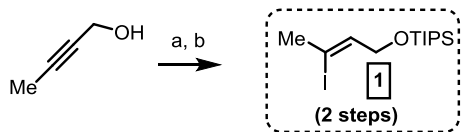

Key: (a) Red-Al, then I<sub>2</sub>; (b) TIPSCI.

### Fragment 2

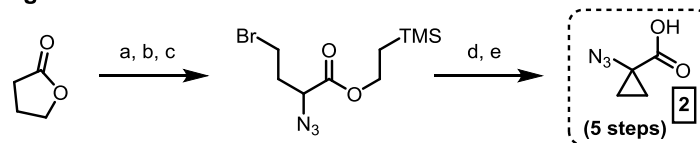

Key: (a) P, Br<sub>2</sub>; (b) TMSCH<sub>2</sub>CH<sub>2</sub>OH; (c) NaN<sub>3</sub>; (d) DBU; (e) TBAF.

### Fragment 3

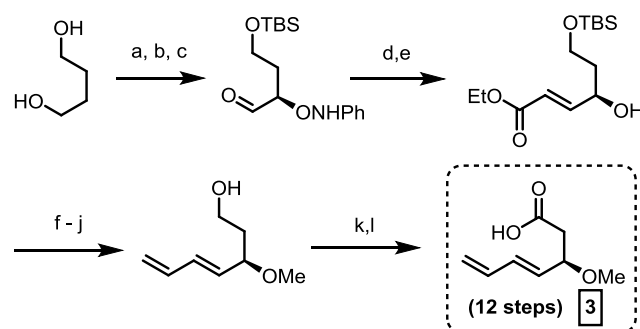

Key: (a) TBSCl; (b) COCl<sub>2</sub>, DMSO, NEt<sub>3</sub>; (c) nitrosobenzene, L-proline; (d) triethyl phosphonoacetate, NaH; (e) CuSO<sub>4</sub>; (f) MeI, NaH; (g) DIBAL-H; (h) MnO<sub>2</sub>; (i) [Ph<sub>3</sub>PCH<sub>3</sub>]<sup>+</sup> tBuOK<sup>-</sup>; (j) py(HF); (k) SO<sub>3</sub>·pyr; (l) NaClO<sub>2</sub>.

### Fragment 4

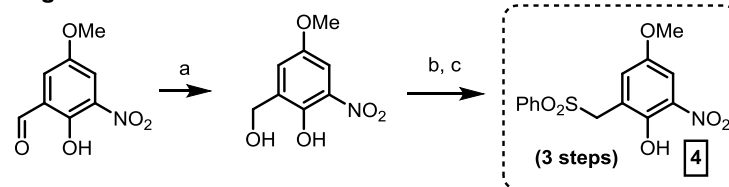

Key: (a) NaBH<sub>4</sub>; (b) HBr, AcOH; (c) NaSO<sub>2</sub>Ph.

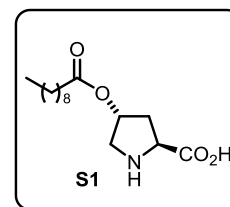

### Fragment 5

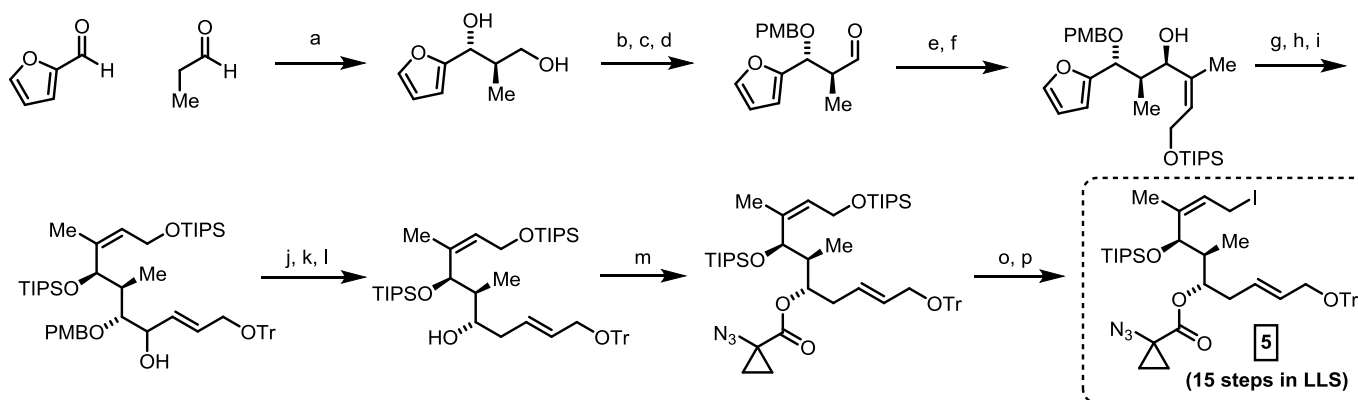

Key: (a) neat **S1**, then NaBH<sub>4</sub>; (b) p-MeOPhCH(OMe)<sub>2</sub>, PPTS; (c) DIBAL-H; (d) SO<sub>3</sub>·pyr; (e) 1, tBuLi, Me<sub>2</sub>Zn; (f) TIPSOTf; (g) O<sub>2</sub>, Rose Bengal, Me<sub>2</sub>S, DABCO; (h) NaBH<sub>4</sub>, CeCl<sub>3</sub>·7H<sub>2</sub>O; (i) TrCl, Et<sub>3</sub>N; (j) 1H-benzotriazole-1-carbaldehyde; (k) [Pd<sub>2</sub>(dba)<sub>3</sub>]·CHCl<sub>3</sub>, nBu<sub>3</sub>P, HCO<sub>2</sub>NH<sub>4</sub>; (l) DDQ; (m) **2**, COCl<sub>2</sub>, DMAP, Et<sub>3</sub>N; (n) HF·Pyr; (o) I<sub>2</sub>, Ph<sub>3</sub>P, imidazole.

D. Hayashi *et al.* *Angew. Chem. Int. Ed.* **2008**, *47*, 6657. (Cont'd)

### Fragment Union

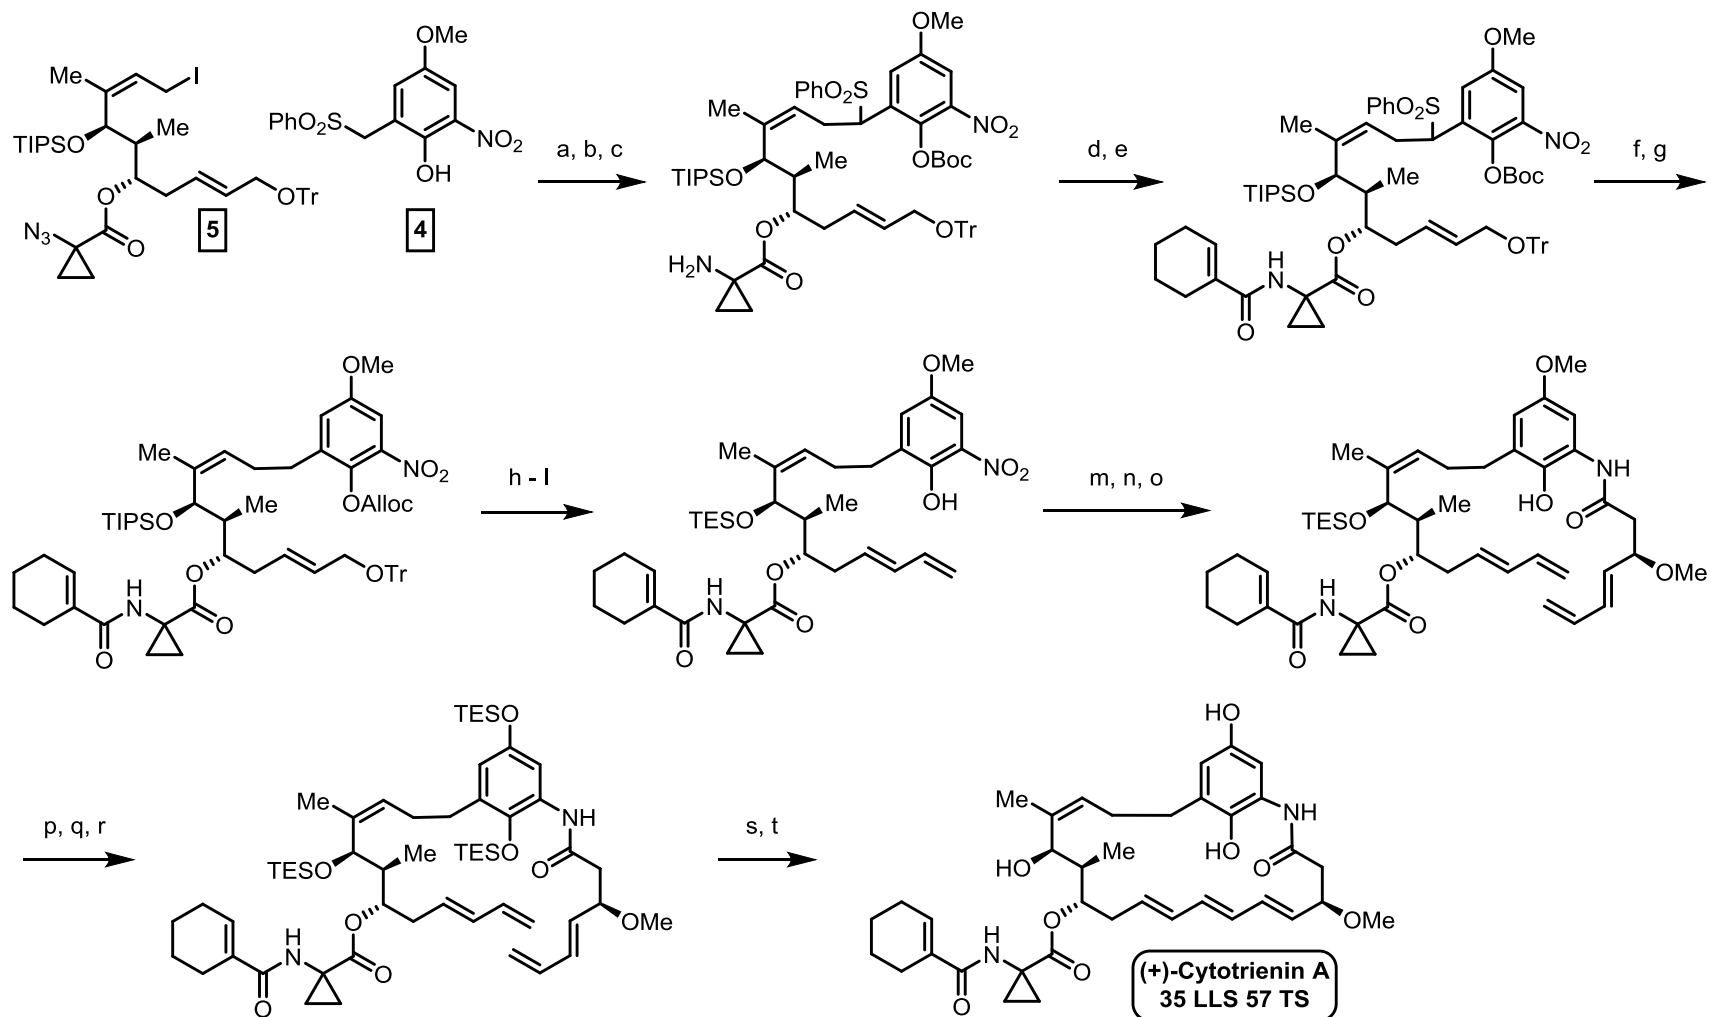

## Graphical Summary of Previous Syntheses of Roxaticin

A. Rychnovsky *et al.* *J. Am. Chem. Soc.* **1994**, *116*, 1753.

### Fragment 1

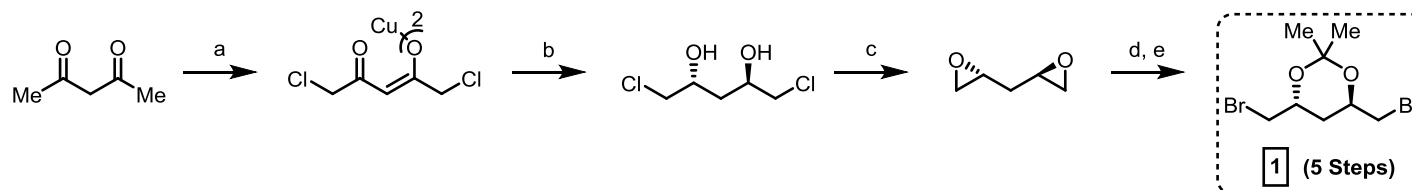

Key: (a)  $\text{AlCl}_3$ ,  $\text{ClCH}_2\text{C(O)Cl}$ ,  $60^\circ\text{C}$ ,  $\text{Cu}(\text{OAc})_2$ ; (b)  $\text{H}_3\text{O}^+$ ,  $[(S)\text{-BINAP}]\text{RuCl}_2\text{Et}_3\text{N}$ ,  $\text{H}_2$  1200 psi,  $120^\circ\text{C}$ , MeOH, recrystallize; (c) KOH,  $\text{Et}_2\text{O}$ ; (d)  $\text{Li}_2\text{NiBr}_4$ ,  $25^\circ\text{C}$ , THF; (e) 2,2-DMP, CSA, Acetone.

### Fragment 2

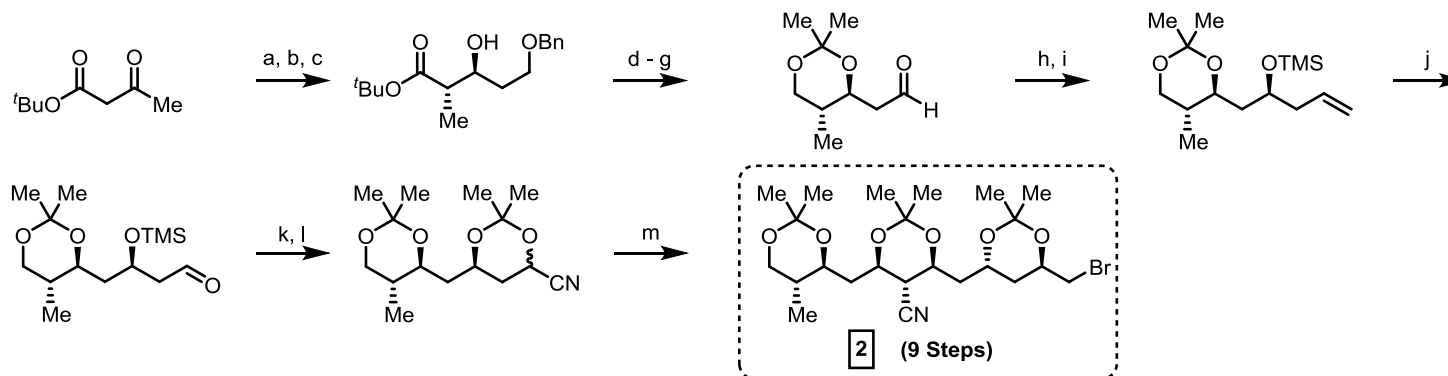

Key: (a) NaH, *n*-BuLi, chloromethyl benzyl ether; (b)  $\text{H}_3\text{O}^+$ ,  $[(S)\text{-BINAP}]\text{RuCl}_2\text{Et}_3\text{N}$ ,  $\text{H}_2$  1620 psi,  $45^\circ\text{C}$ , MeOH; (c) LHMDS, MeI; (d)  $\text{LiAlH}_4$ ; (e) CSA, 2,2-DMP; (f)  $\text{H}_2$ ,  $\text{Pd}(\text{OH})_2/\text{C}$ ; (g) Swern; (h)  $\text{Ipc}_2\text{BCH}_2\text{CH}=\text{CH}_2$ , NaOH,  $\text{H}_2\text{O}_2$ ; (i) BSA,  $\text{CH}_3\text{CN}$ ; (j)  $\text{OsO}_4$ , NMO,  $\text{NaIO}_4$ ; (k) TMS-CN; (l) 2,2-DMP, CSA; (m) **1**,  $\text{LiNEt}_2$ , THF.

### Fragment 3

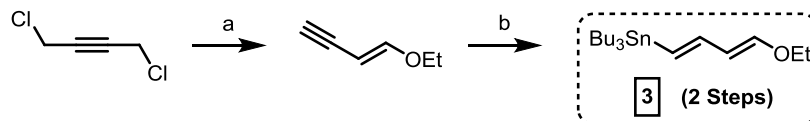

Key: (a) KOH, EtOH. (b)  $\text{Bu}_3\text{SnH}$ , AIBN.



A. Rychnovsky *et al.* *J. Am. Chem. Soc.* **1994**, *116*, 1753. (Cont'd)

### Longest Linear Sequence

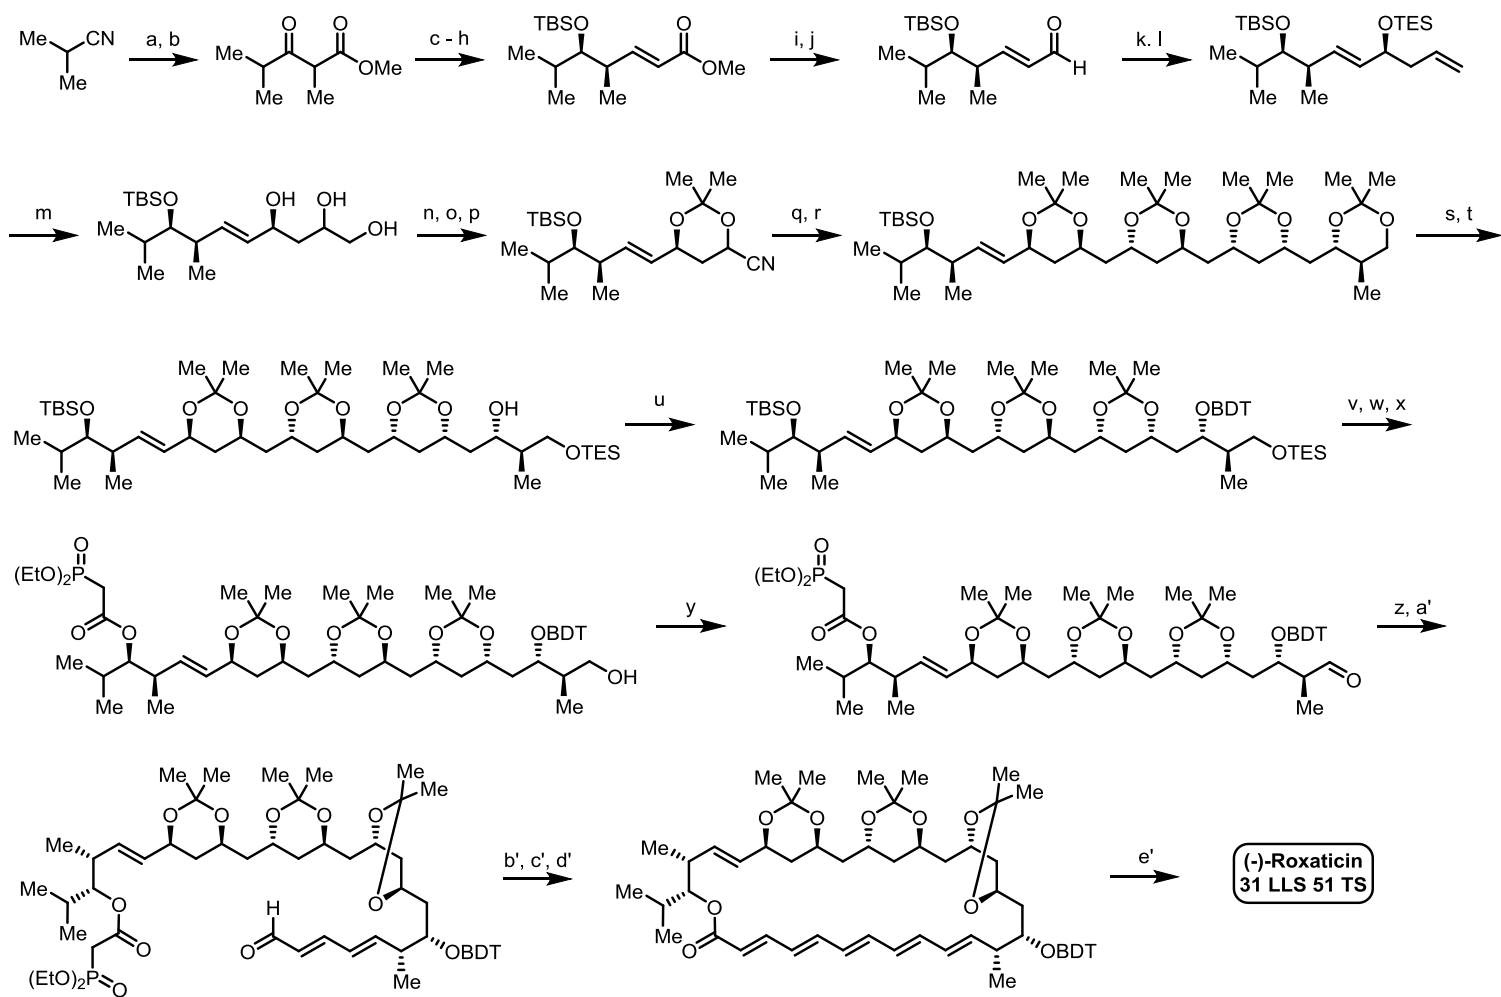

Key: (a) Zn, methyl 2-bromopropionate, THF; (b) H<sub>3</sub>O<sup>+</sup>; (c) (R-BINAP)RuCl<sub>2</sub>, H<sub>2</sub>, MeOH; (d) LAH, (80%), recrystallization (35%); (e) TBSOTf; (f) Dowex H<sup>+</sup>, MeOH; (g) Swern; (h) Ph<sub>3</sub>P=CHCO<sub>2</sub>CH<sub>3</sub>, CH<sub>3</sub>CN, reflux; (i) DIBAL-H; (j) TPAP, NMO; (k) *lpc*<sub>2</sub>BCH<sub>2</sub>CH=CH<sub>2</sub>, NaOH, H<sub>2</sub>O<sub>2</sub>; (l) TESOTf, 2,6-lutidine; (m) OsO<sub>4</sub>, NMO, HOAc, THF, H<sub>2</sub>O; (n) NaIO<sub>4</sub>; (o) K<sub>2</sub>CO<sub>3</sub>, (CH<sub>3</sub>)<sub>2</sub>C(OH)CN; (p) 2,2-DMP, CSA; (q) **2**, LiNEt<sub>2</sub>; (r) LiDBB, THF, MeOH; (s) TESOTf, *i*-Pr<sub>2</sub>NEt; (t) OsO<sub>4</sub>, *t*-BuOH, CDCl<sub>3</sub>, pyridine; (u) 1,3-benzodithiolyli tetrafluoroborate, pyridine; (v) TBAF, THF; (w) (EtO)<sub>2</sub>P(O)CH<sub>2</sub>CO<sub>2</sub>H, BOP, DMAP; (x) MeOH, NH<sub>3</sub>; (y) Dess-Martin; (z) **3**, *n*-BuLi, MgBr<sub>2</sub>, THF, -78 °C; (a') MsCl, Et<sub>3</sub>N; (b') **3**, *n*-BuLi, MgBr<sub>2</sub>, THF, -78 °C; (c') MsCl, Et<sub>3</sub>N; (d') LiCl, DBU; (e') Dowex H<sup>+</sup>, MeOH.

B. Mori *et al. Tetrahedron* **1995**, *51*, 5299; *Tetrahedron* **1995**, *51*, 5315.

### Fragment 1

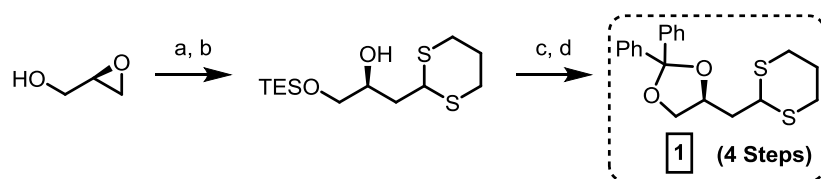

Key: (a) TESCl, Et<sub>3</sub>N; (b) *n*-BuLi, 1,3-dithiane; (c) TBAF; (d) Ph<sub>2</sub>C(OMe)<sub>2</sub>.

### Fragment 2

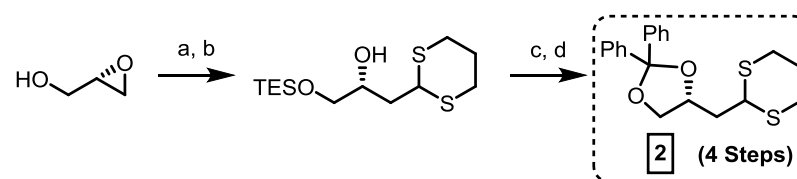

Key: (a) TESCl, Et<sub>3</sub>N; (b) *n*-BuLi, 1,3-dithiane; (c) TBAF; (d) Ph<sub>2</sub>C(OMe)<sub>2</sub>.

### Fragment 3

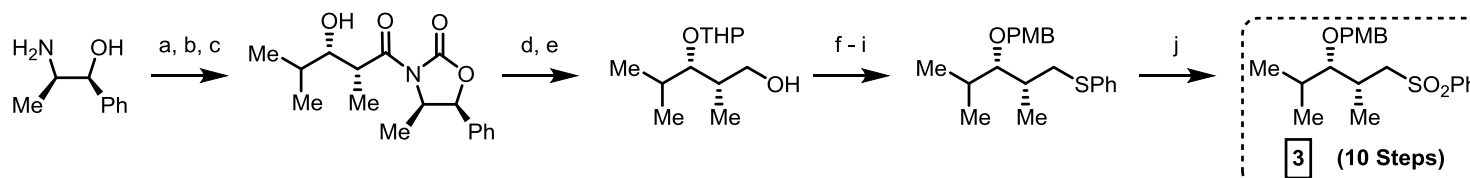

Key: (a) diphenyl carbonate, K<sub>2</sub>CO<sub>3</sub>; (b) *n*-BuLi, CH<sub>3</sub>CH<sub>2</sub>C(O)Cl; (c) Bu<sub>2</sub>BOTf, Et<sub>3</sub>N, Me<sub>2</sub>CHCHO; (d) DHP, PPTS; (e) LiAlH<sub>4</sub>; (f) MeOH, H<sup>+</sup>; (g) TsCl, pyridine; (h) PhSNa; (i) PMBCl, KH; (j) *m*-CPBA.

### Fragment 4

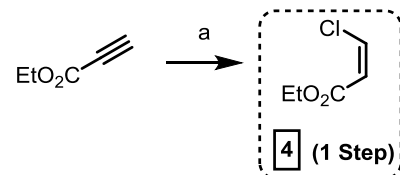

Key: (a) LiCl, HOAc, MeCN.

### Fragment 5

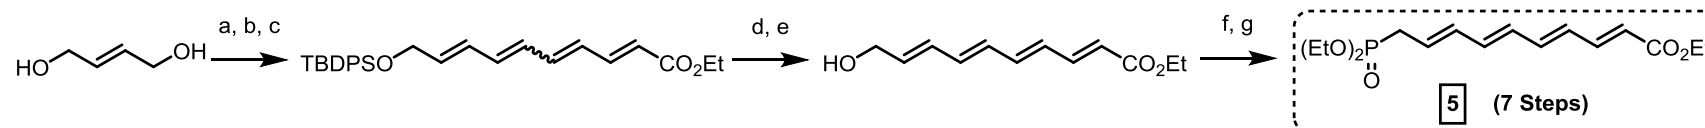

Key: (a) TBDMPSCI, imidazole; (b) MnO<sub>2</sub>; (c) allyl triphenylphosphonium bromide, *n*-BuLi, **4**, *t*-BuOK; (d) TBAF; (e) hv, I<sub>2</sub>; (f) PBr<sub>3</sub>; (g) (OEt)<sub>3</sub>P.

B. Mori *et al. Tetrahedron* **1995**, *51*, 5299; *Tetrahedron* **1995**, *51*, 5315. (Cont'd)

### Longest Linear Sequence

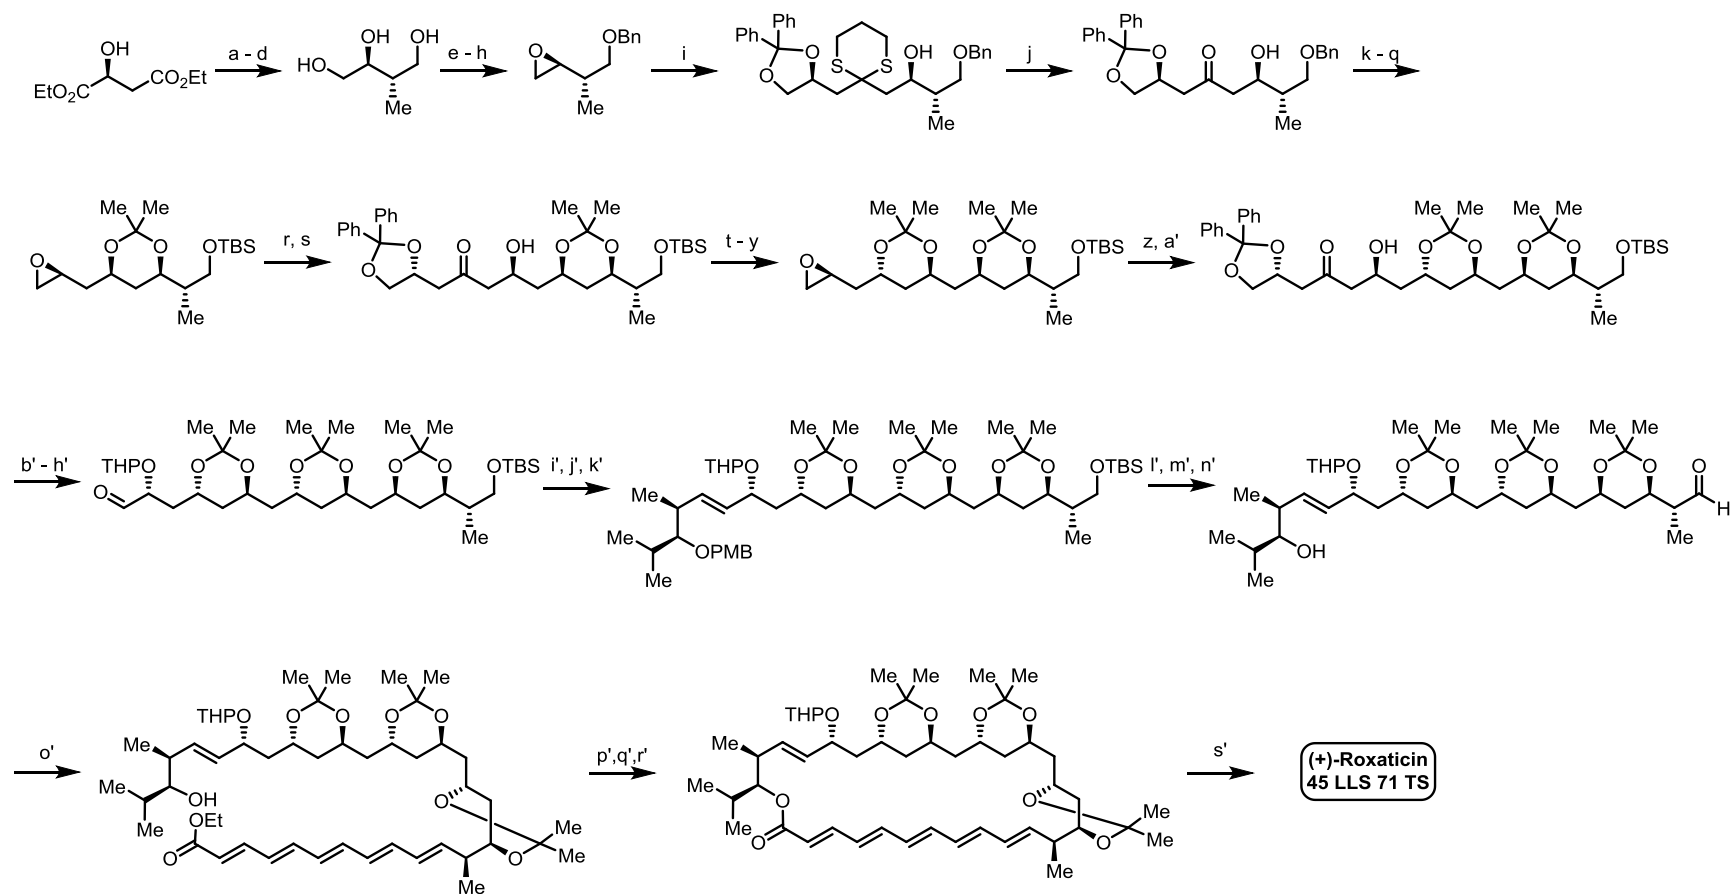

Key: (a) LDA, MeI; (b) DHP, PPTS; (c) LiAlH<sub>4</sub>; (d) MeOH, H<sup>+</sup>; (e) PhCH(OMe)<sub>2</sub>, TsOH; (f) DIBAL; (g) TsCl, pyridin; (h) *t*-BuOK, Et<sub>2</sub>O-MeOH; (i) **1**, *n*-BuLi, THF; (j) Hg(ClO<sub>4</sub>)<sub>2</sub>; (k) NaBH<sub>4</sub>, Et<sub>2</sub>BOMe; (l) Me<sub>2</sub>C(OMe)<sub>2</sub>; (m) H<sub>2</sub>, Pd(OH)<sub>2</sub>; (n) TBSCl, imidazole; (o) Li, NH<sub>3</sub>; (p) TsCl; (q) *t*-BuOK, Et<sub>2</sub>O-MeOH; (r) **2**, *n*-BuLi, THF; (s) MeI, CaCO<sub>3</sub>; (t) Me<sub>4</sub>NBH(OAc)<sub>3</sub>; (u) Me<sub>2</sub>C(OMe)<sub>2</sub>, PPTS; (v) Li, NH<sub>3</sub>; (w) PivCl; (x) MsCl; (y) *t*-BuOK, Et<sub>2</sub>O-MeOH; (z) **2**, *n*-BuLi; (a') MeI, CaCO<sub>3</sub>; (b') Me<sub>4</sub>NBH(OAc)<sub>3</sub>; (c') Me<sub>2</sub>C(OMe)<sub>2</sub>, PPTS; (d') Li, NH<sub>3</sub>; (e') PivCl, pyridine; (f') DHP, PPTS; (g') LiAlH<sub>4</sub>; (h') SO<sub>3</sub>pyr; (i') **3**, *n*-BuLi; (j') Ac<sub>2</sub>O, pyridine; (k') Na-Hg; (l') TBAF; (m') Dess-Martin; (n') DDQ; (o') **5**, LiN(TMS)<sub>2</sub>; (p') LiOH, THF, H<sub>2</sub>O; (q') 2,4,6-trichlorobenzoyl chloride, Et<sub>3</sub>N; (r') DMAP, toluene; (s') Dowex 50Wx8, MeOH.

C. Evans *et al.* *J. Am. Chem. Soc.* **2003**, *125*, 10899.

### Fragment 1

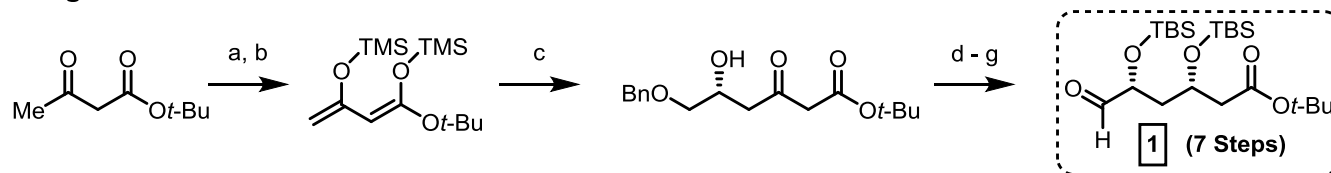

Key: (a) Et<sub>3</sub>N, TMSCl, hexanes; (b) LDA, TMSCl, THF; (c) [Cu((S,S)-Ph-pybox)](SbF<sub>6</sub>)<sub>2</sub> (2 mol%), benzyloxyacetaldehyde, 99% ee; (d) Et<sub>2</sub>BOMe, NaBH<sub>4</sub>, MeOH, THF, -78 °C; (e) TBSCl, imidazole, CH<sub>2</sub>Cl<sub>2</sub>; (f) 2000 psi H<sub>2</sub>, 10% Pd/C, EtOAc; (g) Dess-Martin, CH<sub>2</sub>Cl<sub>2</sub>.

### Fragment 2

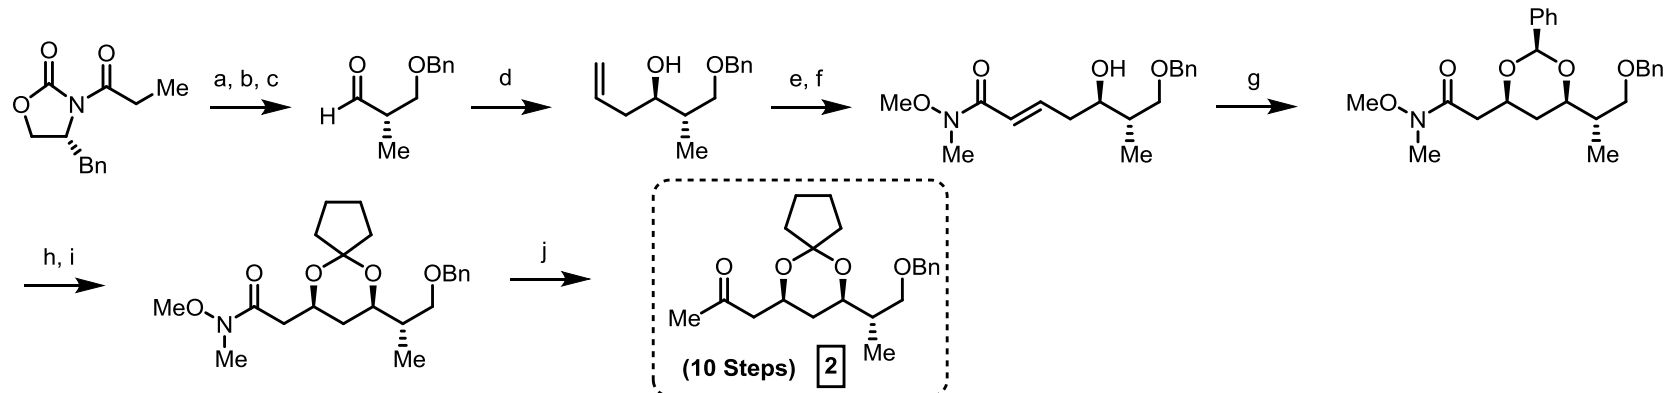

Key: (a) TiCl<sub>4</sub>, NEt<sub>3</sub>, BnOCH<sub>2</sub>Cl, 0 °C, CH<sub>2</sub>Cl<sub>2</sub>; (b) LiBH<sub>4</sub>, 0 °C, THF; (c) SO<sub>3</sub>·pyr, DMSO, -10 °C, CH<sub>2</sub>Cl<sub>2</sub>; (d) allyltributyltin, SnCl<sub>4</sub>, -78 °C, CH<sub>2</sub>Cl<sub>2</sub>; (e) TESCl, imidazole, CH<sub>2</sub>Cl<sub>2</sub>; (f) O<sub>3</sub>, Ph<sub>3</sub>P, N-MeO-N-Me(triphenylphosphoranylidene)-acetamide, TsOH, CH<sub>2</sub>Cl<sub>2</sub>; (g) cat. KHMDS, PhCHO, 0 °C, THF; (h) Zn(OTf)<sub>2</sub>, EtSH, NaHCO<sub>3</sub>, CH<sub>2</sub>Cl<sub>2</sub>; (i) cyclopentylidene dimethyl ketal, PPTS, CH<sub>2</sub>Cl<sub>2</sub>; (j) MeLi, -78 °C, THF.

### Fragment 3

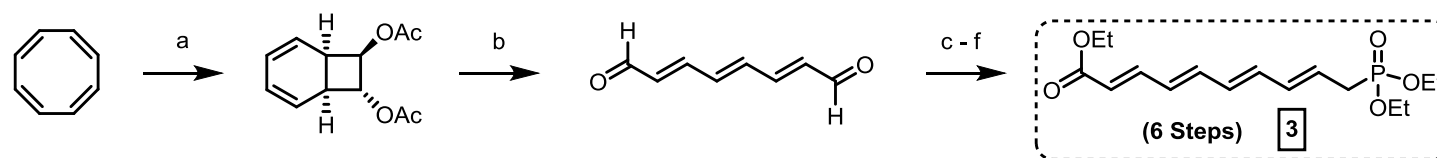

Key: (a) Hg(OAc)<sub>2</sub>, AcOH; (b) LiAlH<sub>4</sub>, THF, 0 °C to rt, then O<sub>2</sub>; (c) triethylphosphonoacetate, NaH, -78 °C to rt, THF; (d) NaBH<sub>4</sub>, EtOH; (e) SOBr<sub>2</sub>, 2,6-di-*tert*-butylpyridine, -20 °C, THF; (f) (EtO)<sub>3</sub>P, toluene, 110 °C.

**Longest Linear Sequence**

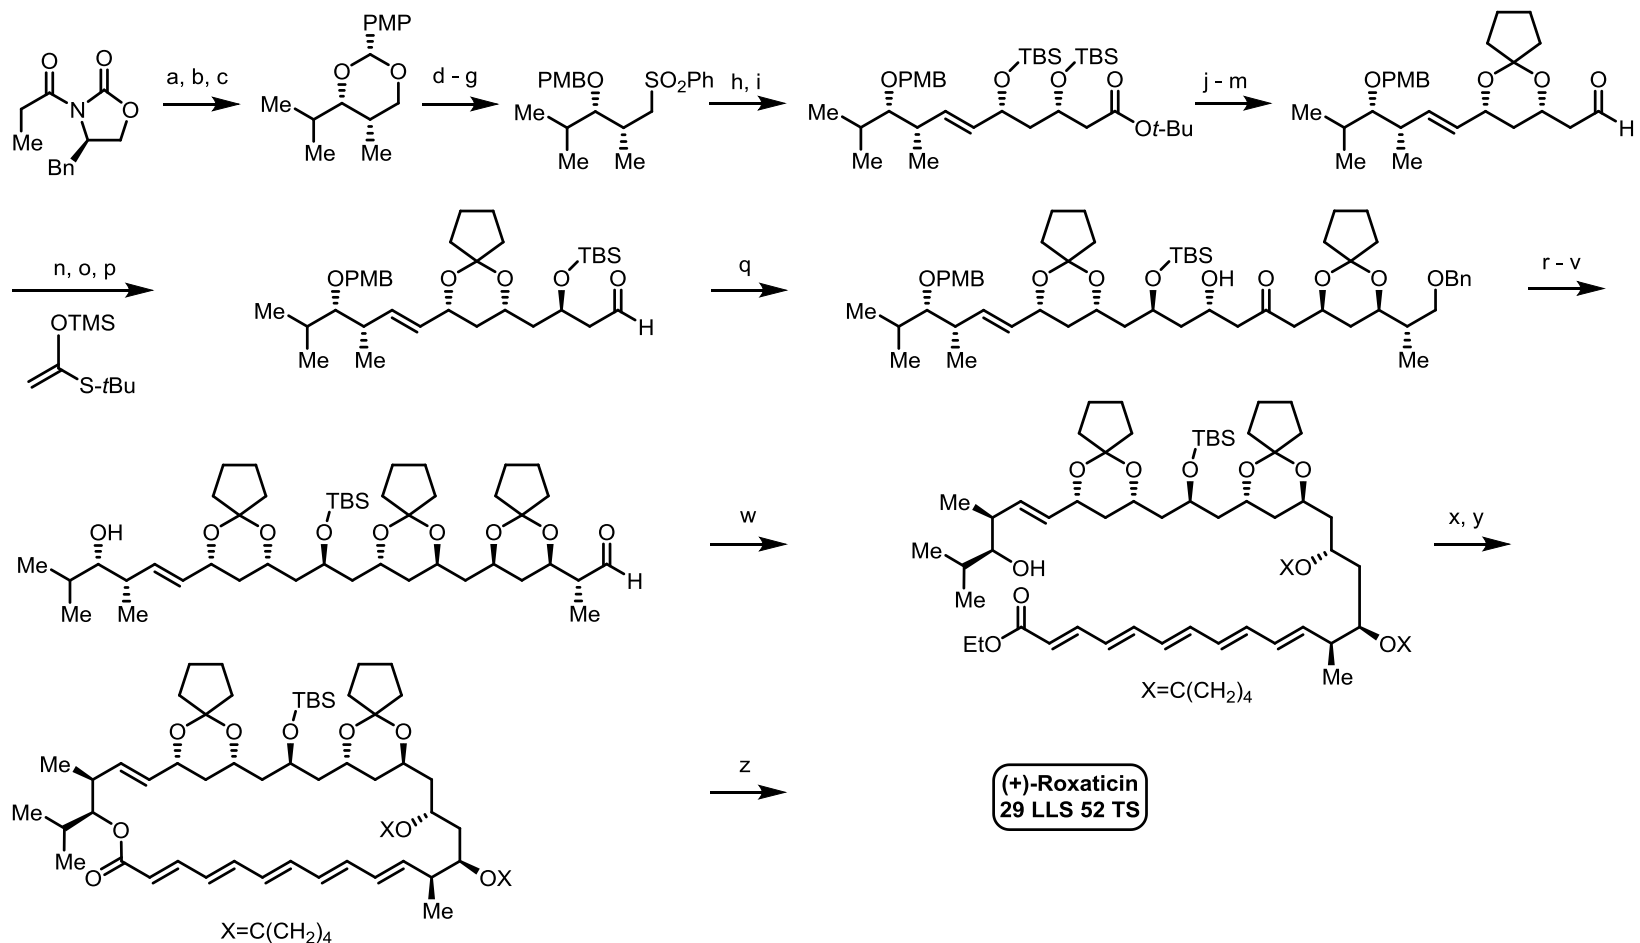

Key: (a)  $\text{Bu}_2\text{BOTf}$ ,  $\text{NEt}_3$ , *i*-PrCHO,  $\text{CH}_2\text{Cl}_2$ ,  $-78^\circ\text{C}$ ,  $\text{CH}_2\text{Cl}_2$ ; (b)  $\text{LiBH}_4$ , MeOH, THF,  $-78^\circ\text{C}$ ; (c) cat. TsOH, *p*-MeOPhCH(OMe)<sub>2</sub>,  $\text{CH}_2\text{Cl}_2$ ; (d) DIBAL-H,  $\text{CH}_2\text{Cl}_2$ ,  $-78^\circ\text{C}$ ; (e) MsCl,  $\text{NEt}_3$ ,  $\text{CH}_2\text{Cl}_2$ ; (f) PhSLi, THF,  $-78^\circ\text{C}$  to  $23^\circ\text{C}$ ; (g) *m*-CPBA,  $\text{CH}_2\text{Cl}_2$  Zn(OTf)<sub>2</sub>; (h) *n*-BuLi,  $\text{BF}_3\text{OEt}_2$ , **1**,  $-78^\circ\text{C}$ , THF; (i) Na/Hg,  $\text{Na}_2\text{HPO}_4$ ,  $-40^\circ\text{C}$  to  $23^\circ\text{C}$ , MeOH; (j) HFpyr, THF; (k) cyclopentylidene dimethyl ketal, PPTS,  $\text{CH}_2\text{Cl}_2$ ; (l)  $\text{LiAlH}_4$ , THF; (m) Dess-Martin,  $\text{CH}_2\text{Cl}_2$ ; (n)  $\text{BF}_3\text{OEt}_2$ ,  $-90^\circ\text{C}$ , toluene; (o) TBSOTf, 2,6-lutidine,  $-78^\circ\text{C}$ ,  $\text{CH}_2\text{Cl}_2$ ; (p) DIBAL-H,  $-78^\circ\text{C}$ , toluene; (q)  $\text{BuBOTf}$ ,  $\text{NEt}_3$ ,  $-78^\circ\text{C}$  to  $100^\circ\text{C}$ , **2**,  $\text{Et}_2\text{O}$ ; (r)  $\text{Me}_4\text{NBH}(\text{OAc})_3$ ,  $-25^\circ\text{C}$ ,  $\text{CH}_3\text{CN}$ , AcOH; (s) cyclopentylidene dimethyl ketal, PPTS,  $\text{CH}_2\text{Cl}_2$ ; (t) LiDBB,  $-78^\circ\text{C}$ , THF; (u) Dess-Martin,  $\text{CH}_2\text{Cl}_2$ ; (v) DDQ,  $\text{H}_2\text{O}$ ,  $\text{CH}_2\text{Cl}_2$ ; (w) **3**, LiHMDS,  $-78^\circ\text{C}$ , THF; (x) LiOH, THF,  $\text{H}_2\text{O}$ , MeOH; (y) 2,4,6-trichlorobenzoyl chloride,  $\text{NEt}_3$ , DMAP,  $23^\circ\text{C}$ , toluene; (z) PPTS, MeOH.

## Graphical Summary of Previous Syntheses of Bryostatins

A. Keck *et al.* *J. Am. Chem. Soc.* **2011**, *133*, 744.

### Fragments 1,2

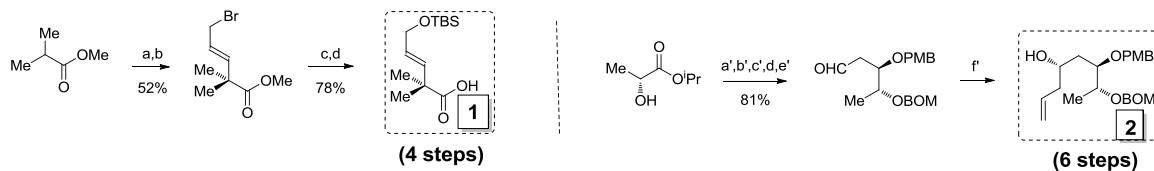

Key : (a) LDA, allylbromide; (b) NBS, benzoyl peroxide; (c) 2,6-di-*t*-Bu-4-Me-pyridine, AgOTf, TBDSOH; (d) NaOH, EtOH, H<sub>2</sub>O. (a') BOMCl; (b') DIBAL; (c') allyl-SnBu<sub>3</sub>, MgBr·OEt<sub>2</sub>; (d') PMBBR, KH; (e') O<sub>3</sub>, NaHCO<sub>3</sub>; (f') allyl-SnBu<sub>3</sub>, MgBr<sub>2</sub>·OEt<sub>2</sub>

### Fragment 3

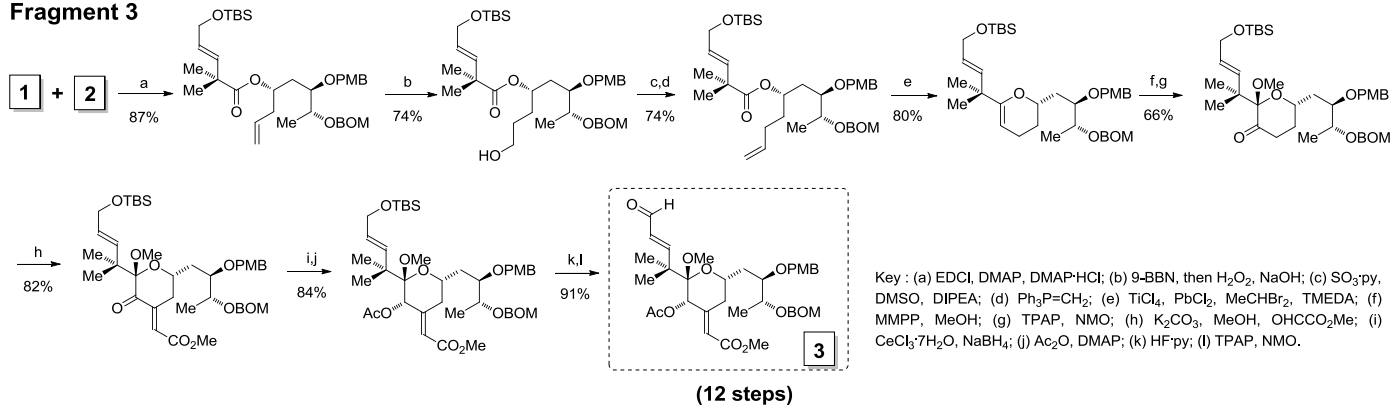

Key : (a) EDCI, DMAP, DMAP·HCl; (b) 9-BBN, then H<sub>2</sub>O<sub>2</sub>, NaOH; (c) SO<sub>3</sub>·py, DMSO, DIPEA; (d) Ph<sub>3</sub>P=CH<sub>2</sub>; (e) TiCl<sub>4</sub>, PbCl<sub>2</sub>, MeCHBr<sub>2</sub>, TMEDA; (f) MMPP, MeOH; (g) TPAP, NMO; (h) K<sub>2</sub>CO<sub>3</sub>, MeOH, OHCCO<sub>2</sub>Me; (i) CeCl<sub>3</sub>·7H<sub>2</sub>O, NaBH<sub>4</sub>; (j) Ac<sub>2</sub>O, DMAP; (k) HF·py; (l) TPAP, NMO.

### Fragment 4

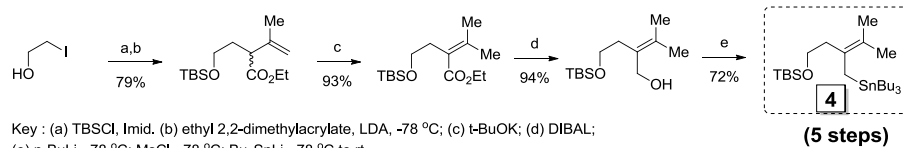

Key : (a) TBSCl, Imid; (b) ethyl 2,2-dimethylacrylate, LDA, -78 °C; (c) *t*-BuOK; (d) DIBAL; (e) *n*-BuLi, -78 °C; MsCl, -78 °C; Bu<sub>3</sub>SnLi, -78 °C to rt.

### Fragment 5

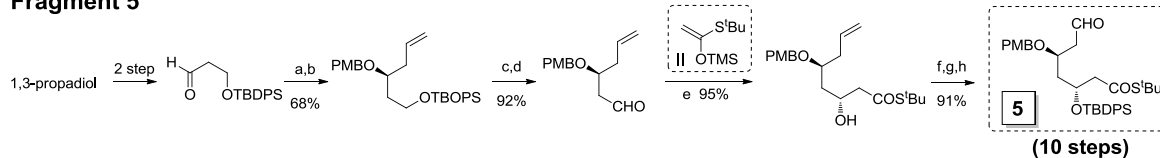

Key : (a) (S)-(-)-1,1-bi-2-naphthol, Ti(O-*i*-Pr)<sub>4</sub>, 4 Å MS, -20 °C; (b) PMBOC(NH)CCl<sub>3</sub>, CSA; (c) TBAF; (d) SO<sub>3</sub>·py, DIPEA, DMSO, -5 °C; (e) TiCl<sub>2</sub>(*Oi*-Pr)<sub>2</sub>; (f) TBDPSCl, imid.; (g) OsO<sub>4</sub>, NMO, *t*-BuOH/THF/H<sub>2</sub>O; (h) Pb(OAc)<sub>4</sub>.

A. Keck *et al.* *J. Am. Chem. Soc.* **2011**, *133*, 744. (Cont'd)

Fragment 6

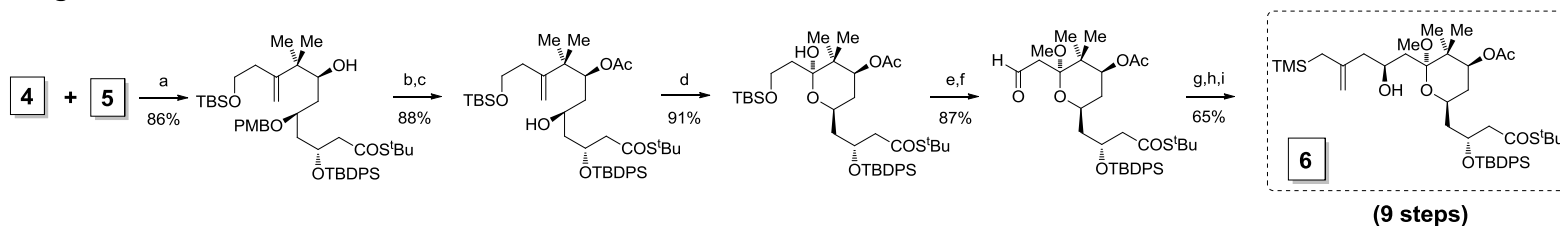

Key : (a)  $\text{Me}_2\text{AlCl}$ ,  $-78^\circ\text{C}$ ; (b)  $\text{Ac}_2\text{O}$ , DMAP,  $\text{Et}_3\text{N}$ ; (c) DDQ; (d)  $\text{O}_3$ ,  $-78^\circ\text{C}$ ; DMS; (e) CSA; (f)  $\text{SO}_3\cdot\text{py}$ , DIPEA, DMSO,  $-5^\circ\text{C}$ ; (g) trimethyl(2-tributylstannylmethyl)allylsilane, reflux; (h)  $\text{SO}_3\cdot\text{py}$ , DIPEA, DMSO,  $-15^\circ\text{C}$ ; (i)  $\text{NaBH}_4$ ,  $\text{CeCl}_3\cdot 7\text{H}_2\text{O}$ , MeOH,  $-42^\circ\text{C}$ .

End Game

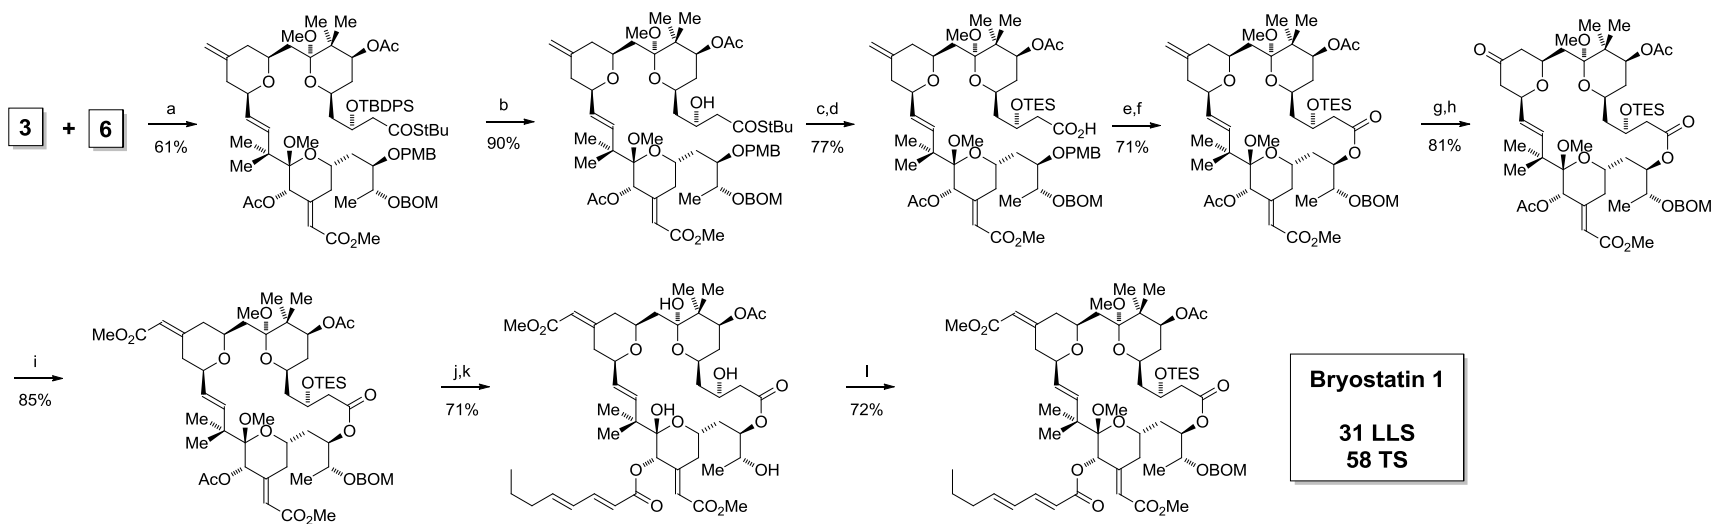

Key : (a) TMSOTf,  $\text{Et}_2\text{O}$ ,  $-78^\circ\text{C}$ ; (b) HF $\cdot$ py; (c) LiOH,  $\text{H}_2\text{O}_2$ , THF/ $\text{H}_2\text{O}$ ; (d) TESCl, DMAP; (e) DDQ; (f) 2,4,6- $\text{Cl}_3\text{PhCOCl}$ , TEA then DMAP; (g) AD mix- $\alpha$ ; (h)  $\text{NaIO}_4$ ; (i) [(*R*)-BINOL]P(O)CH $_2$ CO $_2$ Me, NaHMDS,  $-78^\circ\text{C}$  to  $0^\circ\text{C}$ ; (j)  $\text{K}_2\text{CO}_3$ , MeOH; (k)  $(\text{C}_8\text{H}_{11}\text{O}_2)_2\text{O}$ , py, DMAP; (l) LiBF $_4$ .

B. Evans *et al.* *Angew. Chem. Int. Ed.* **1998**, *37*, 2354; *J. Am. Chem. Soc.* **1999**, *121*, 7540.

### Fragments 1,2

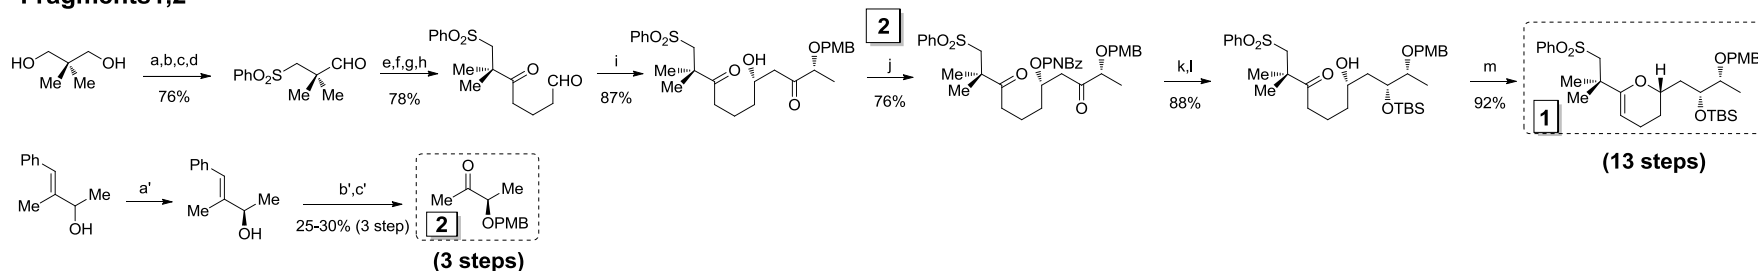

Key: (a) TsCl, py; (b) PhSH, NaH, 80 °C; (c) m-CPBA; (d) (COCl)<sub>2</sub>, DMSO, TEA, -78 °C - 0 °C; (e) BrMg(CH<sub>2</sub>)<sub>3</sub>CH<sub>2</sub>CH<sub>2</sub>; (f) (COCl)<sub>2</sub>, DMSO, TEA, -78 °C - -50 °C; (g) K<sub>2</sub>OsO<sub>4</sub>(OH)<sub>2</sub>, quinuclidine, K<sub>3</sub>Fe(CN)<sub>6</sub>, K<sub>2</sub>CO<sub>3</sub>; (h) NaIO<sub>4</sub>, NaHCO<sub>3</sub>; (i) **2**, (-)-DIPICL, TEA, -78; then aldehyde, -70 °C; (j) SmI<sub>2</sub>, p-NO<sub>2</sub>PhCHO, 0 °C; (k) TBSOTf, 2,6-lutidine, -15; (l) LiOH, 2:2:1 THF/MeOH/H<sub>2</sub>O; (m) CSA, PhH, 80 °C.

(a') L-(+)-DIPT, Ti(Oi-Pr)<sub>4</sub>, t-Bu<sub>2</sub>O<sub>2</sub>H, -20 °C; (b') NaH, PMBBR, catalytic n-Bu<sub>4</sub>NI; (c') O<sub>3</sub>, 78 °C, then Me<sub>2</sub>S.

### Fragment 3

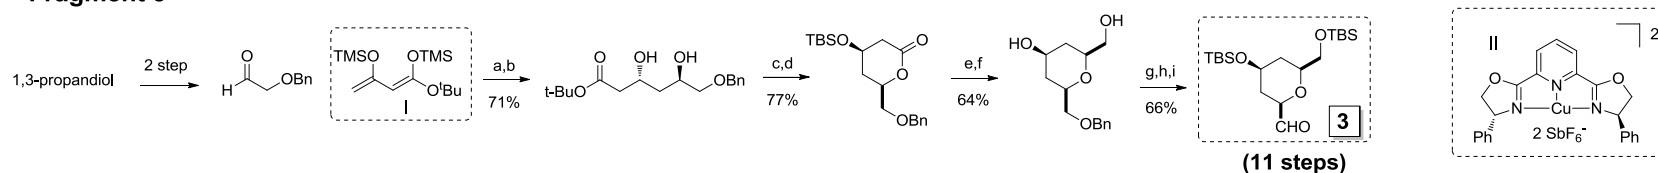

Key: (a) **I**, **II**, -90 °C; (b) Me<sub>4</sub>NHB(OAc)<sub>3</sub>, AcOH/MeCN, -35 °C; (c) F<sub>3</sub>CCO<sub>2</sub>H; (d) TESCl, imid.; (e) PMBOCH<sub>2</sub>Li, -78 °C - -50 °C; (f) BF<sub>3</sub>·OEt<sub>2</sub>, Et<sub>3</sub>SiH, -20 °C; (g) TBSCl, imd., DMAP; (h) H<sub>2</sub>, Pd/C, AcOH, EtOAc; (i) (COCl)<sub>2</sub>, DMSO, TEA, -78 °C - -50 °C.

### Fragment 4

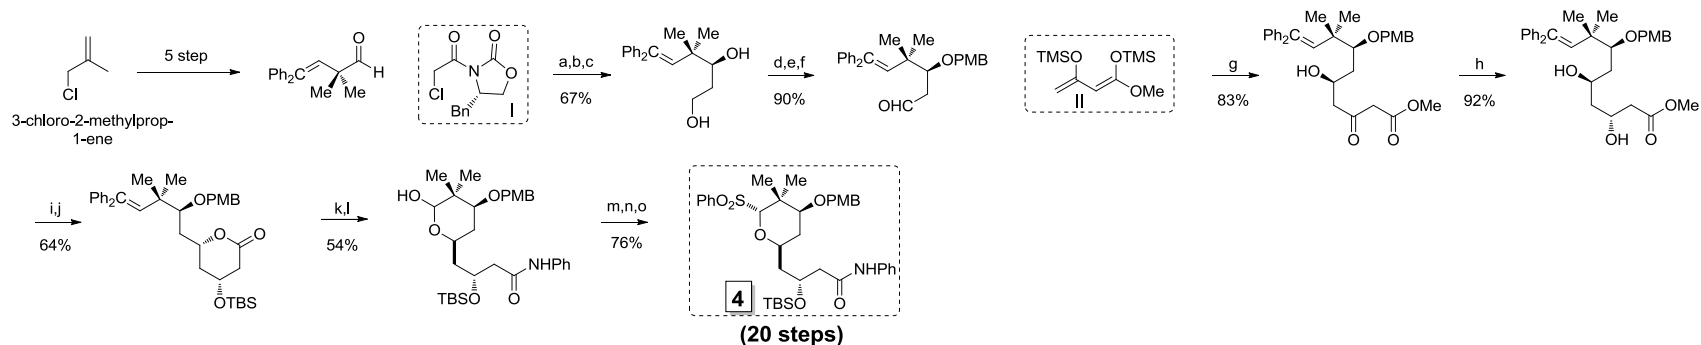

Key: (a) **I**, Bu<sub>2</sub>BOTf, i-Pr<sub>2</sub>NEt, then aldehyde, -78 °C - 0 °C; (b) Zn, 2:1 THF/AcOH; (c) LiBH<sub>4</sub>, MeOH, 0 °C; (d) PMPCH(OMe)<sub>2</sub>, PPTS, (e) DIBAL-H, 0 °C; (f) (COCl)<sub>2</sub>, DMSO, NEt<sub>3</sub>, -78 °C; (g) TiCl<sub>2</sub>(Oi-Pr)<sub>2</sub>, -78 °C, then **II**, 78 °C; (h) Me<sub>4</sub>NHB(OAc)<sub>3</sub>, AcOH/MeCN, -35 °C; (i) PPTS, PhH, 80 °C; (j) TBSOTf, 2,6-lutidine, -10 °C; (k) Me<sub>3</sub>Al, HCl.H<sub>2</sub>NPh; (l) O<sub>3</sub>, -78 °C, then Me<sub>2</sub>S; (m) Ac<sub>2</sub>O, py; (n) PhTMS, ZnI<sub>2</sub>, n-Bu<sub>4</sub>NI; (o) m-CPBA, NaHCO<sub>3</sub>, EtOAc.



B. Evans *et al.* *Angew. Chem. Int. Ed.* **1998**, *37*, 2354; *J. Am. Chem. Soc.* **1999**, *121*, 7540. (Cont'd)

End Game

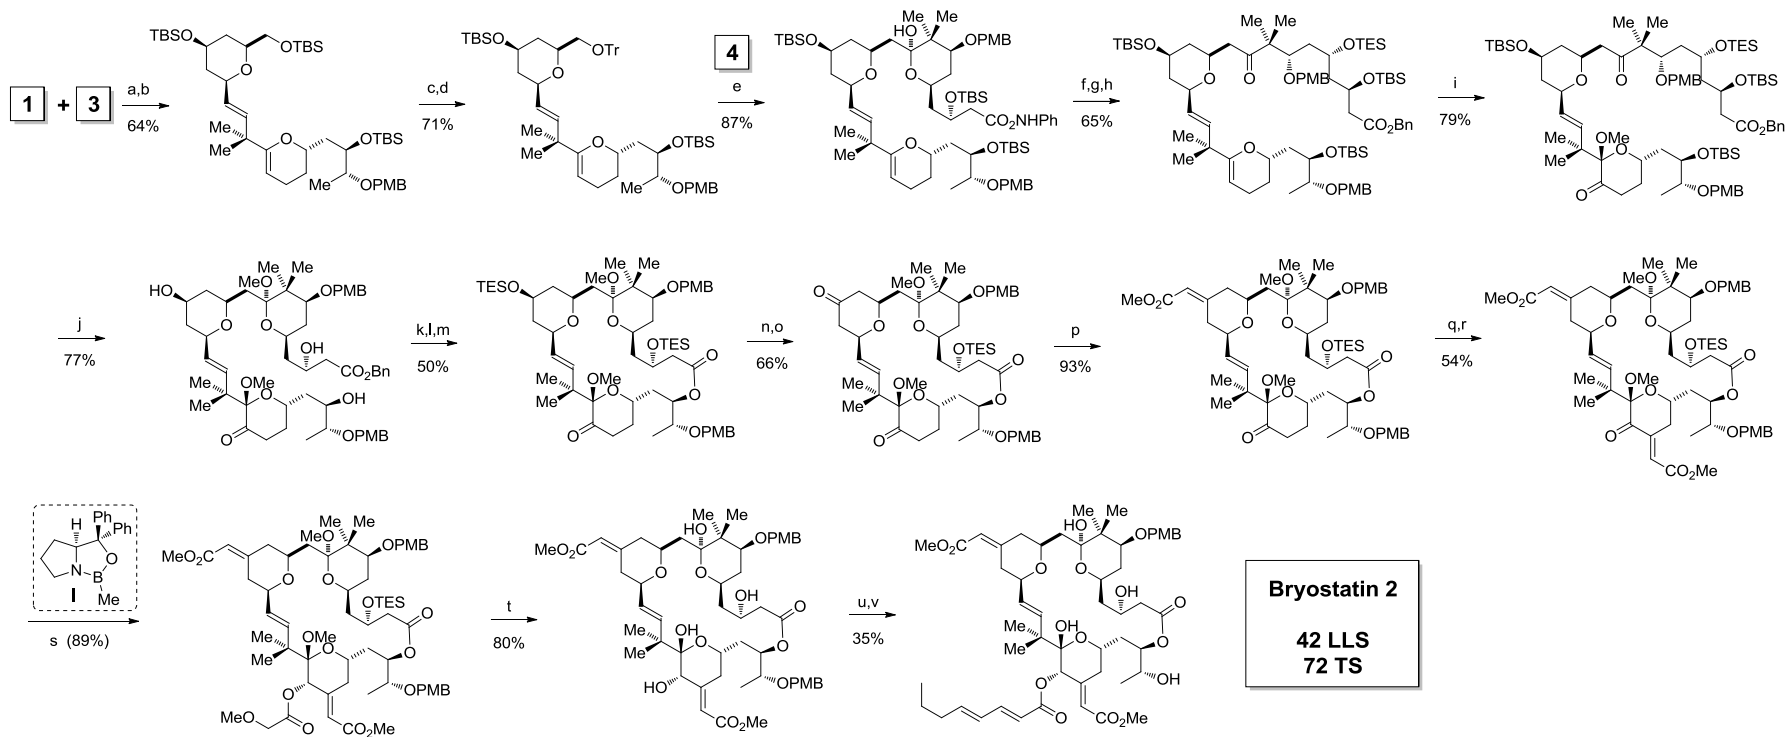

Key : (a) *n*-BuLi, THF, -78 °C then **3**, -78 °C - -50 °C; Ac<sub>2</sub>O, DMAP; (b) Mg, HgCl<sub>2</sub>, EtOH; (c) TBAF, -15 °C; (d) Tf<sub>2</sub>O, 2,6-lutidine, -10 °C; (e) **4**, *n*-BuLi, -78 °C, then HMPA, then **triflate**, -78 °C; (f) TESCl, imid.; (g) Boc<sub>2</sub>O, DMAP; (h) BnOLi, -30 °C; (i) (i) *m*-CPBA, MeOH, -20 °C, (ii) ClCH<sub>2</sub>CO<sub>2</sub>H, MeOH, 0 °C, (iii) Dess-Martin periodinane, py; (j) HF.pyr; (k) TESCl, DMAP, 10 °C; (l) 1,4-cyclohexadiene, 10% Pd/C, EtOAc; (m) 2,4,6-trichlorobenzoyl chloride, DIPEA, then DMAP; (n) PPTS, 2:1 MeOH/(MeO)<sub>3</sub>CH, -30 °C; (o) Dess-Martin periodinane, pyr; (p) [(*R*)-BINOL]POCH<sub>2</sub>CO<sub>2</sub>Me, NaHMDS, -78 °C, then ketone, -15 °C; (q) KHMDS, -78 °C, then OHCCO<sub>2</sub>Me, -78 °C; (r) Et<sub>3</sub>NSO<sub>2</sub>NCO<sub>2</sub>Me; (s) **I**, BH<sub>3</sub>·SMe, then MeOH, then MAc<sub>2</sub>O, py, DMAP; (t) (i) PPTS, 3:1 THF/H<sub>2</sub>O, (ii) Na<sub>2</sub>CO<sub>3</sub>, MeOH, (iii) *p*TsOH; (u) (*E,E*)-2,4-octadienoic acid, DIC, DMAP; (v) DDQ.

C. Yamamura *et al.* *Angew. Chem. Int. Ed.* **2000**, *39*, 2290.

Fragments 1,2

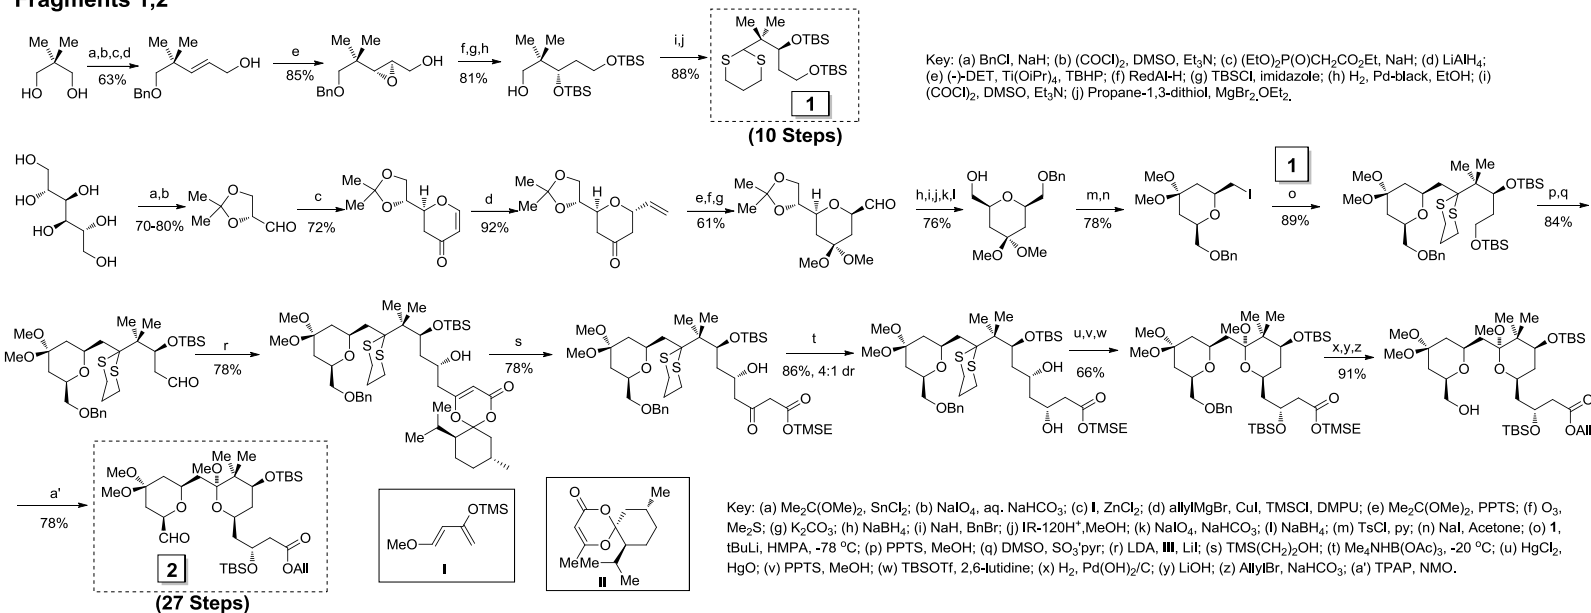

Fragments 3,4

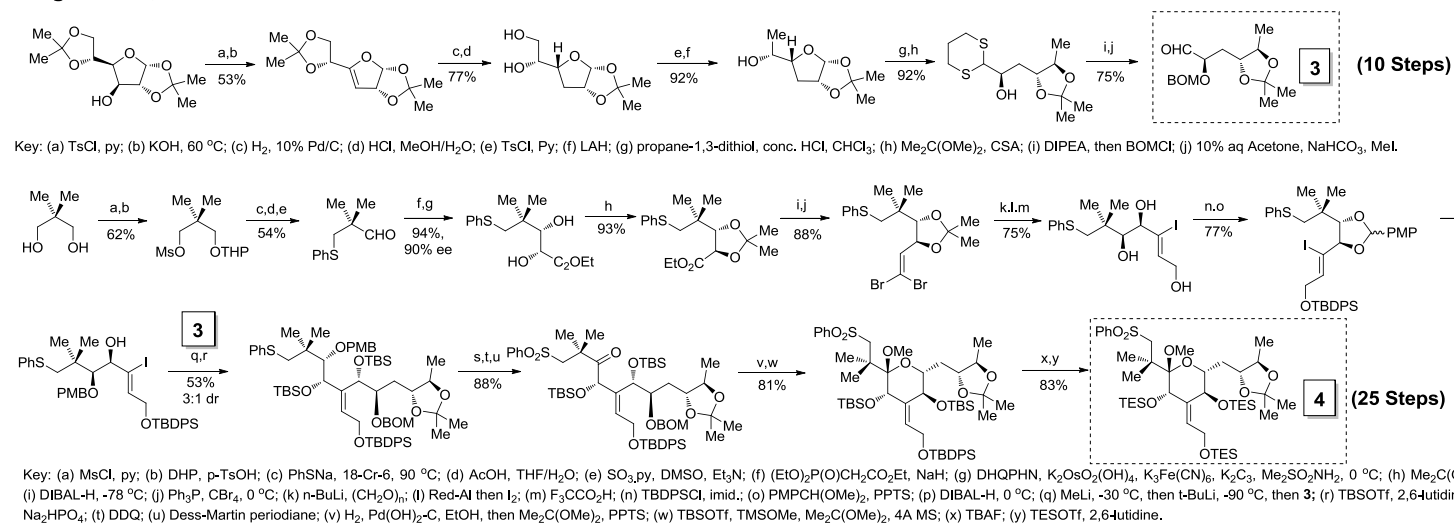

End Game

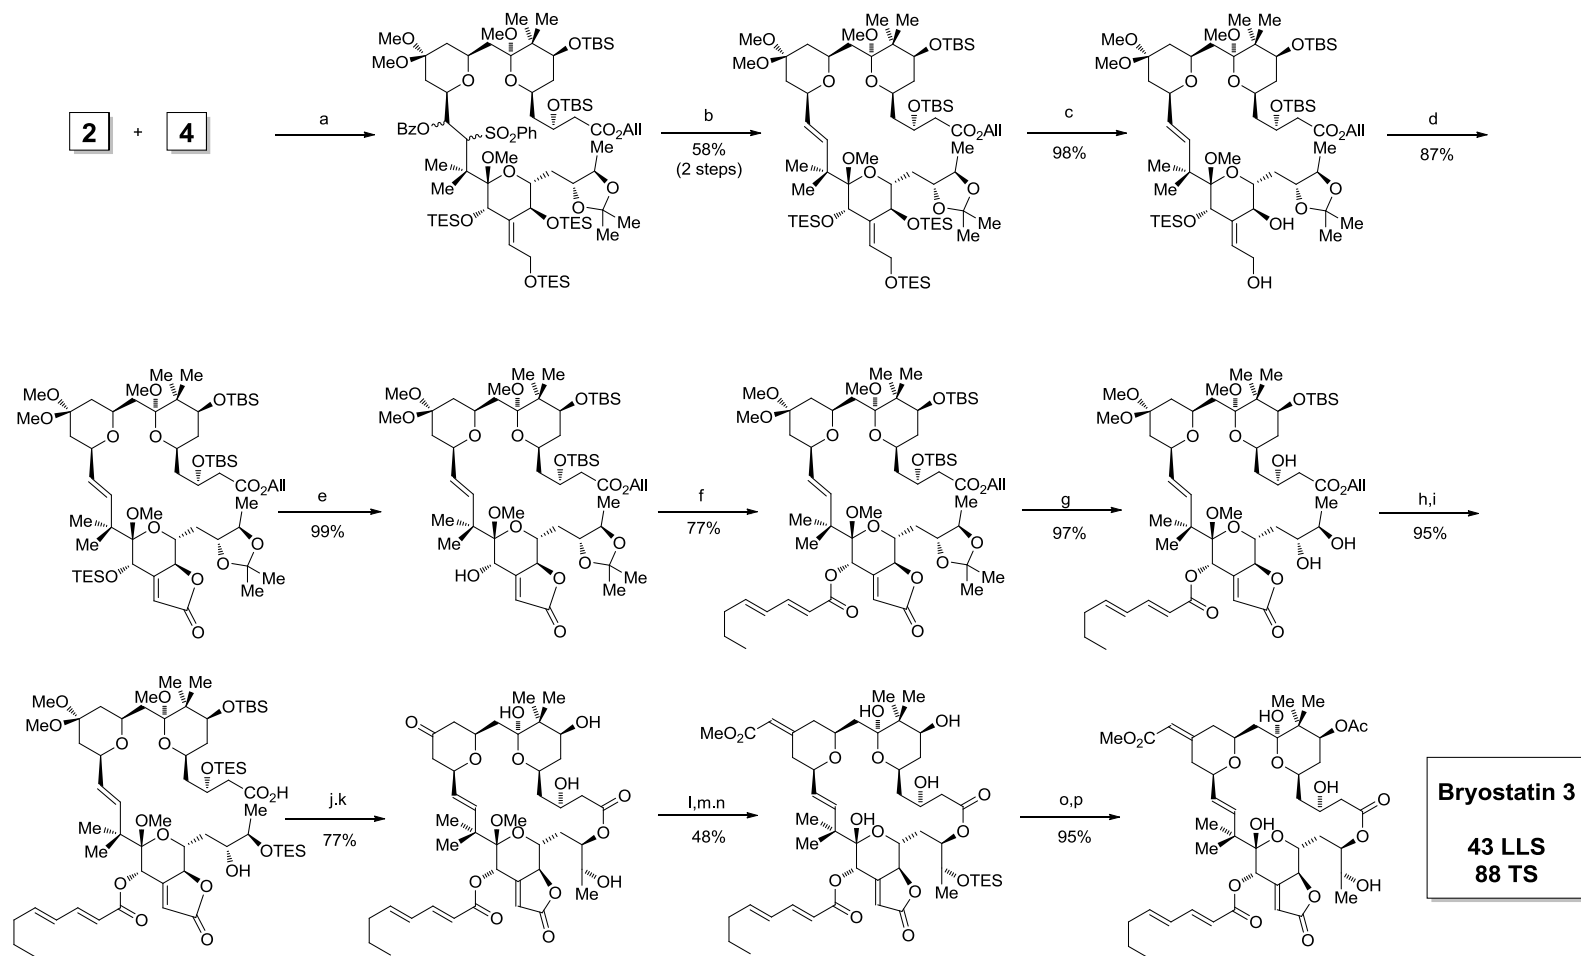

Key: (a) **4**, PhLi, then **2**, then BzCl, DMAP, -78 to 0 °C; (b) 5% Na/Hg, -35 °C; (c) TBAF, AcOH, 0 °C; (d) TPAP, NMO; (e) TBAF, AcOH, 0 °C; (f) (E,E)-2,4-octadienoic acid, 2,4,6-trichlorobenzoyl chloride, Et<sub>3</sub>N, DMAP; (g) CSA, MeOH; (h) TESCl, Et<sub>3</sub>N, DMF, -30 °C; (i) [Ph(PPh<sub>3</sub>)<sub>4</sub>], morpholine; (j) 2,4,6-trichlorobenzoyl chloride, Et<sub>3</sub>N, then DMAP; (k) 46% aq. HF, H<sub>2</sub>O; (l) [(R)-BINOL]P(O)CH<sub>2</sub>CO<sub>2</sub>Me, NaH, 0 °C; (m) TFA, H<sub>2</sub>O, CH<sub>2</sub>Cl<sub>2</sub>; (n) TESCl, DMAP, 0 °C; (o) Ac<sub>2</sub>O, py; (p) 46% aq. HF, MeCN.

D. Masamure *et al.* *J. Am. Chem. Soc.* **1990**, *112*, 7407.

**Fragments 1, 2**

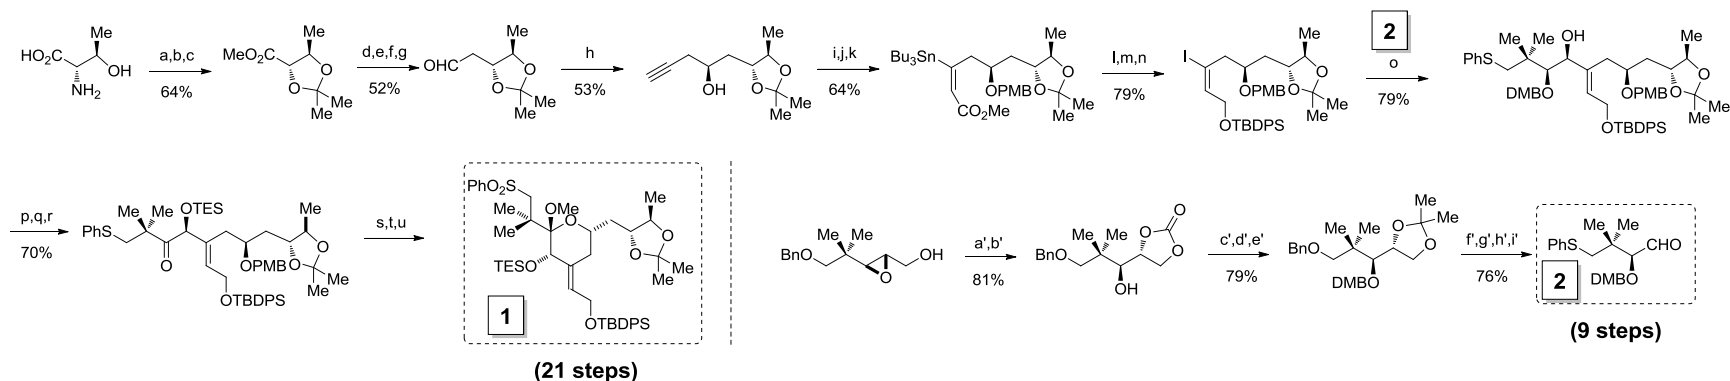

Key : (a) NaNO<sub>2</sub>, H<sub>2</sub>SO<sub>4</sub>, H<sub>2</sub>O; (b) MeOH, AcCl; (c) (MeO)<sub>2</sub>CMe<sub>2</sub>, p-TsOH; (d) DIBAL-H; (e) Ph<sub>3</sub>P=CH<sub>2</sub>; (f) Sia<sub>2</sub>BH, H<sub>2</sub>O<sub>2</sub>; (g) PCC; (h) Allenyl-ZnBr; (i) NaH, PMBCl; (j) t-BuLi, ClCO<sub>2</sub>Me; (k) n-Bu<sub>3</sub>SnCu.LiBr.Me<sub>2</sub>S; (l) DIBAL-H; (m) TBDPSCI, imid.; (n) I<sub>2</sub>; (o) n-BuLi, then **2**; (p) TEOTf, 2,6-Lutidine; (q) DDQ; (r) DMSO, Ac<sub>2</sub>O, TEA; (s) MoO<sub>5</sub>.HMPA, H<sub>2</sub>O; (t) DDQ, SiO<sub>2</sub>; (u) TMSOTf, TMSOMe.  
(a') PhNCO, TEA; (b') BF<sub>3</sub>.OEt<sub>2</sub>, 10 aq. H<sub>2</sub>SO<sub>4</sub>; (c') K<sub>2</sub>CO<sub>3</sub>, MeOH; (d') (MeO)<sub>2</sub>CMe<sub>2</sub>, PPTS; (e') NaH, m,p-dimethoxybenzyl chloride; (f') Raney Ni, H<sub>2</sub>; (g') MsCl, TEA, PhSNa; (h') HCl, MeOH; (l') NaIO<sub>4</sub>, pH7.

**Fragments 3, 4**

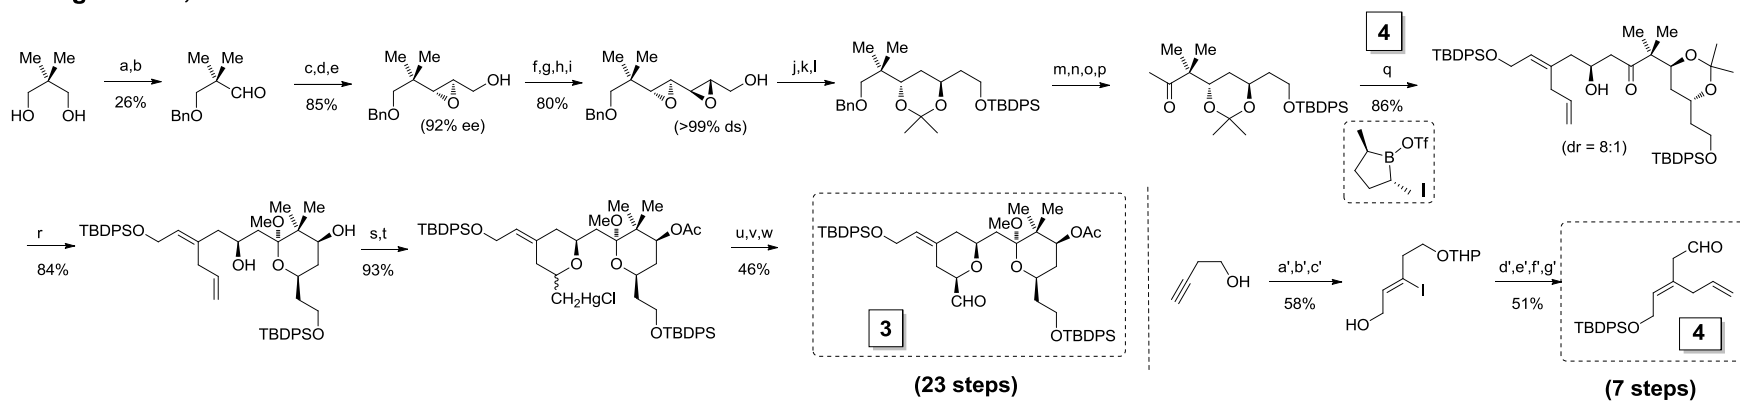

Key : (a) NaH, DMF, BnCl; (b) CrO<sub>3</sub>, Py; (c) (EtO)<sub>2</sub>(P=O)CH<sub>2</sub>CO<sub>2</sub>Et, NaH; (d) DIBAL-H; (e) (-)-DET, Ti(O<sup>i</sup>Pr)<sub>4</sub>, 'BOOH'; (f) Swern oxid.; (g) Ph<sub>3</sub>P=CHCHO; (h) NaBH<sub>4</sub>, MeOH; (i) (+)-DET, Ti(O<sup>i</sup>Pr)<sub>4</sub>, 'BOOH'; (j) RedAl-H; (k) TBDPSCI, imid.; (l) PPTS, (MeO)<sub>2</sub>CMe<sub>2</sub>; (m) Na, liquid NH<sub>3</sub>; (n) Swern oxid.; (o) MeLi; (p) Swern oxid.; (q) (R,R)-borolane triflate(**1**), DIPEA, then **4**; (r) (MeO)<sub>3</sub>CH, MeOH, PPTS; (s) Hg(OAc)<sub>2</sub>, MeOH, then KCl; (t) Ac<sub>2</sub>O, Py, DMAP; (u) NaBH<sub>4</sub>, O<sub>2</sub>; (v) Swern oxid.; (w) Al<sub>2</sub>O<sub>3</sub>.  
(a') DHP, PPTS; (b') nBuLi; HCHO; (c') RedAl-H, then I<sub>2</sub>; (d') TBDPSCI, imid.; (e') Allyl-MgBr, CuI; (f') PPTS, EtOH; (g') (py)<sub>2</sub>CrO<sub>3</sub>.

D. Masamure *et al. J. Am. Chem. Soc.* **1990**, *112*, 7407. (Cont'd)

End Game (Bryostatin 7, Masamure)

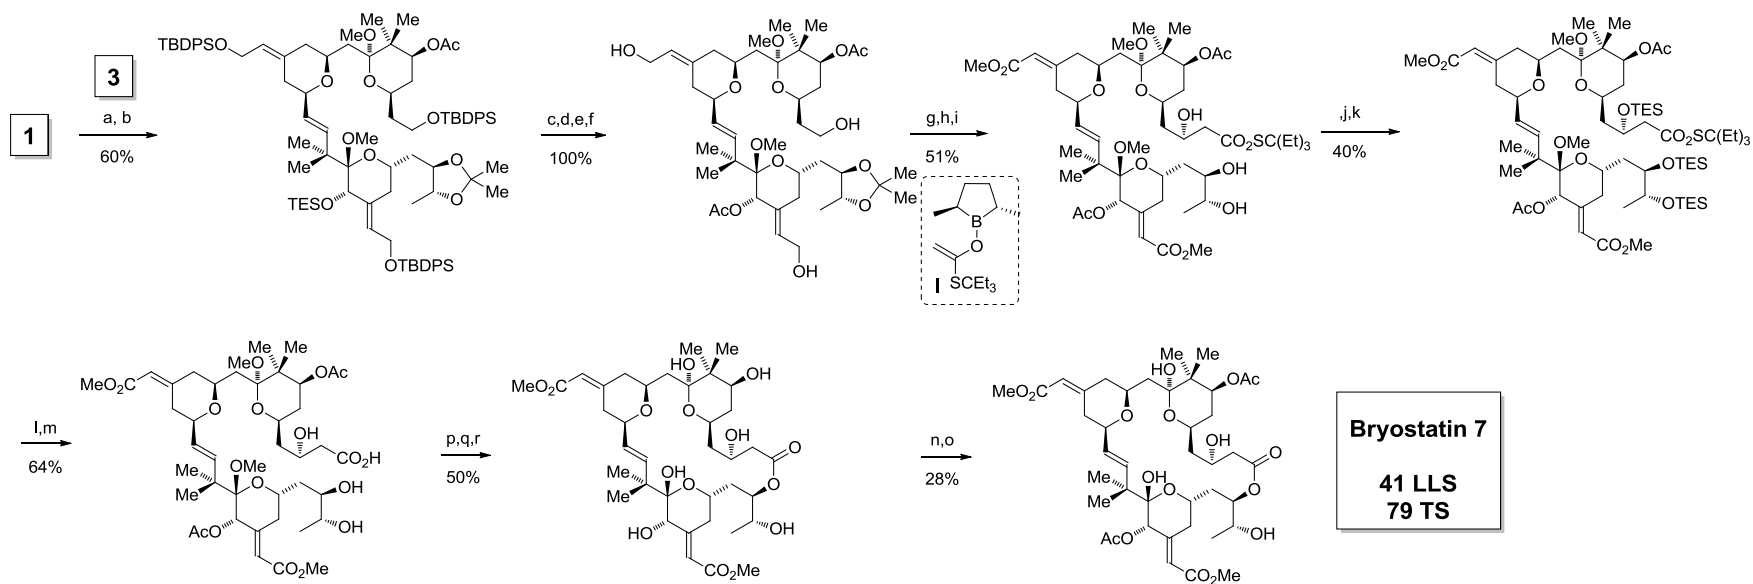

Key : (a) PhLi, -78°C; **3**; BzCl, DMAP, -78°C to 25°C; (b) Na-Hg, NaHPO<sub>4</sub>, -20°C; (c) TBAF; (d) TBSCl, imid.; (e) Ac<sub>2</sub>O, Py, DMAP; (f) TBAF; (g) MnO<sub>2</sub>, NaCN, AcOH; (h) Swern oxid.; (i) boron enolate(**I**), DIPEA; (j) CSA, MeOH; (k) TESOTf, 2,6-lutidine; (l) Hg(O<sub>2</sub>CCF<sub>3</sub>)<sub>2</sub>, NaHPO<sub>4</sub>; (m) HF·Py; (n) DCC, PPTS, Py; (o) K<sub>2</sub>CO<sub>3</sub>, MeOH; (p) TBSCl, TEA, DMAP; (q) Ac<sub>2</sub>O, Py; (r) HF, MeCN.

E. Hale *et al.* *Org. Lett.* **2001**, 3, 3791; *Org. Lett.* **2003**, 5, 503; *Org. Lett.* **2006**, 8, 4477.

### Fragment 1

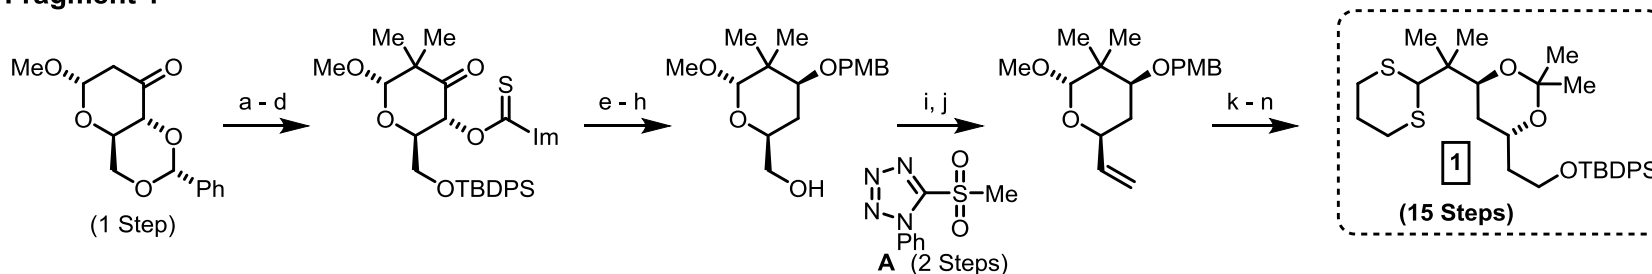

Key: (a) KH, then MeI; (b) H<sub>2</sub>, Pd(OH)<sub>2</sub>/C; (c) TBDPSiCl, imidazole; (d) Im<sub>2</sub>C=S; (e) Bu<sub>3</sub>SnH, AIBN; (f) Me<sub>3</sub>Al, IPA; (g) PMBOC(=NH)CCl<sub>3</sub>, PPTS; (h) TBAF; (i) TPAP, NMO, 4A MS; (j) **A**, KHMDS. (k) Catecholborane, (PPh<sub>3</sub>)<sub>3</sub>RhCl, then NaOH (aq.), H<sub>2</sub>O<sub>2</sub>; (l) 1,3-Propanedithiol, BF<sub>3</sub>•OEt<sub>2</sub>; (m) TBDPSiCl, imidazole; (n) Me<sub>2</sub>C(OMe)<sub>2</sub>, PPTS.

### Fragment 2

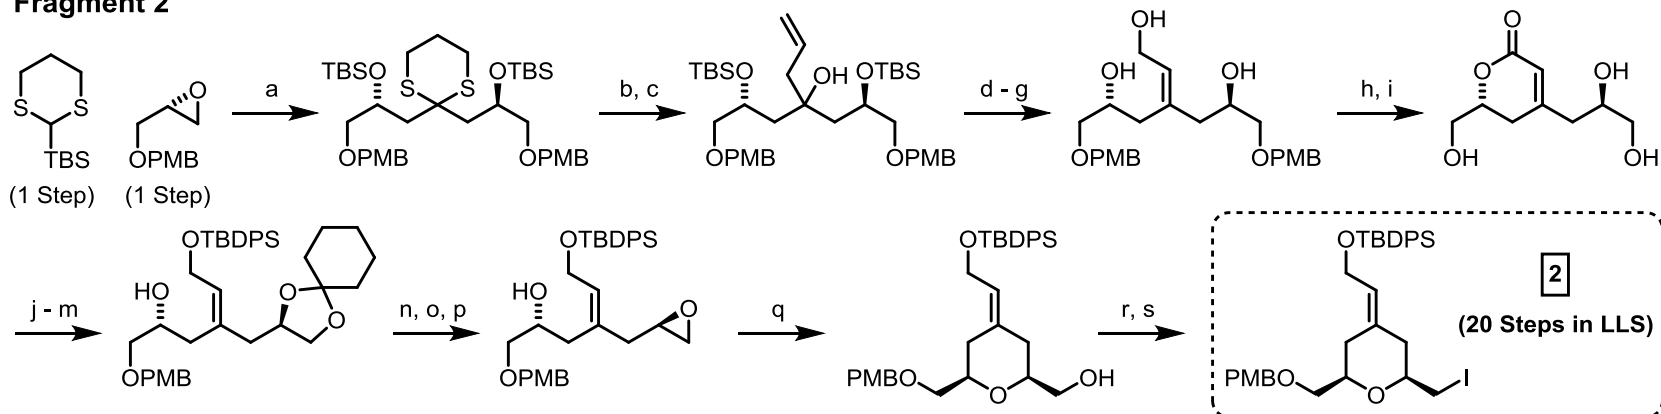

Key: (a) *t*BuLi, HMPA, then TBSCl; (b) Hg(ClO<sub>4</sub>)<sub>2</sub>•xH<sub>2</sub>O, CaCO<sub>3</sub>; (c) AllylMgBr; (d) OsO<sub>4</sub>, NaIO<sub>4</sub>; (e) (CF<sub>3</sub>CO)<sub>2</sub>O, Et<sub>3</sub>N, DMAP; (f) *i*Bu<sub>2</sub>AlH; (g) TBAF; (h) MnO<sub>2</sub>; (i) TFA, anisole; (j) Cyclohexanone, *p*TsOH; (k) PMBOC(=NH)CCl<sub>3</sub>, PPTS; (l) NaBH<sub>4</sub>, CeCl<sub>3</sub>•7H<sub>2</sub>O; (m) TBDPSiCl, imidazole; (n) 1,3-Propanedithiol, BF<sub>3</sub>•OEt<sub>2</sub>; (o) MsCl, collidine; (p) NaH, imidazole; (q) CSA; (r) TsCl, Pyr; (s) NaI.

### Fragment 3

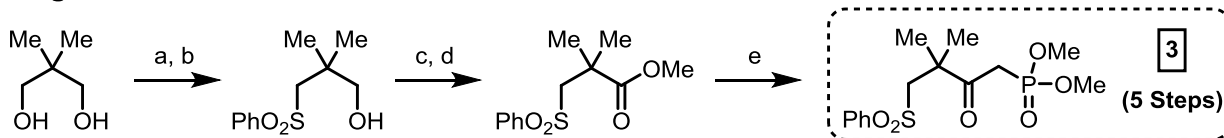

Key: (a) PhSSPh, PBU<sub>3</sub>; (b) Oxone; (c) RuCl<sub>3</sub>•xH<sub>2</sub>O, NaIO<sub>4</sub>; (d) K<sub>2</sub>CO<sub>3</sub>, MeI; (e) (MeO)<sub>2</sub>P(O)Me, *n*BuLi.

E. Hale et al. *Org. Lett.* **2001**, 3, 3791; *Org. Lett.* **2003**, 5, 503; *Org. Lett.* **2006**, 8, 4477. (Cont'd)

### Fragment 4

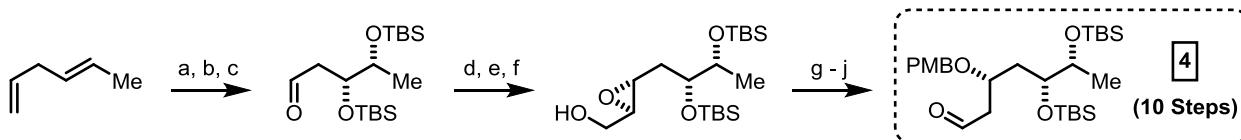

Key: (a) AD-mix- $\beta$ ; (b) TBSCl, imidazole; (c) OsO<sub>4</sub>, NaIO<sub>4</sub>; (d) Ph<sub>3</sub>P=CH<sub>2</sub>CO<sub>2</sub>Et; (e) DIBAL; (f) (-)-DET, Ti(O*i*Pr)<sub>4</sub>, *t*BuO<sub>2</sub>H, 4A MS; (g) Red-Al; (h) PMPCH(OMe)<sub>2</sub>, PPTS; (i) DIBAL; (j) (COCl)<sub>2</sub>, DMSO, Et<sub>3</sub>N.

### Fragment Union 1

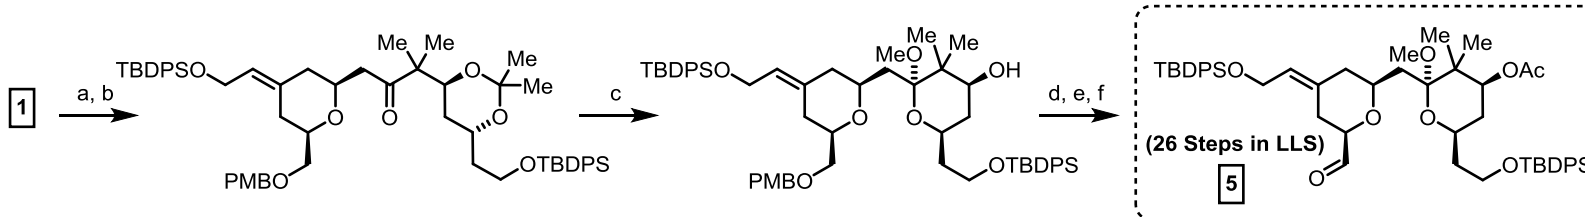

Key: (a) *t*BuLi, HMPA, then **2**; (b) Hg(ClO<sub>4</sub>) $\cdot$ xH<sub>2</sub>O, CaCO<sub>3</sub>; (c) PPTS, (MeO)<sub>3</sub>CH, MeOH; (d) Ac<sub>2</sub>O, Pyr, DMAP; (e) DDQ; (f) TPAP, NMO, 4A MS.

### Fragment Union 2

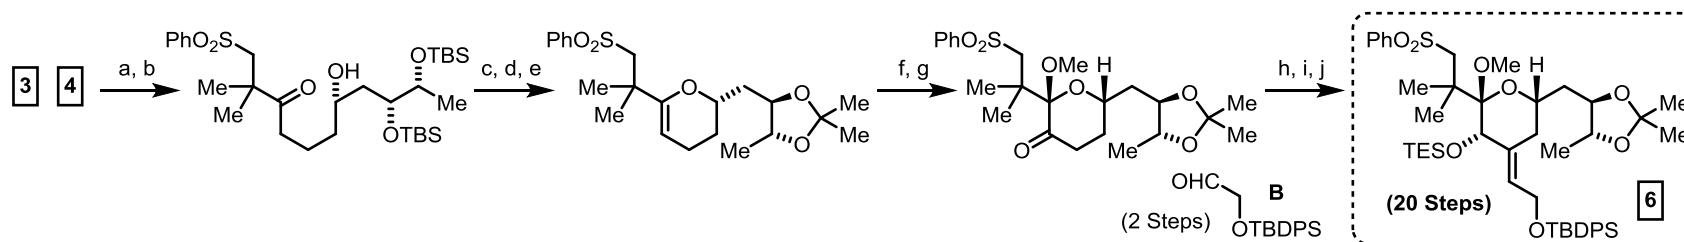

Key: (a) LiCl, *i*Pr<sub>2</sub>NEt; (b) Pd(OH)<sub>2</sub>/C, H<sub>2</sub>; (c) CSA; (d) TBAF; (e) Me<sub>2</sub>C(OMe)<sub>2</sub>, PPTS; (f) DMDO, Me<sub>2</sub>C(OMe)<sub>2</sub>, PPTS, 4A MS, MeOH; (g) PDC; (h) *n*BuLi, **B**; (i) NaBH<sub>4</sub>, CeCl<sub>3</sub> $\cdot$ 7H<sub>2</sub>O; (j) TESOTf, 2,6-lutidine.

### End Game

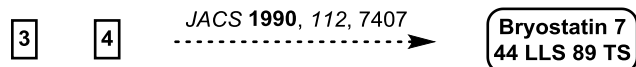





G. Wender et al. *J. Am. Chem. Soc.* **2011**, *133*, 9228.

**Fragments 1,2**

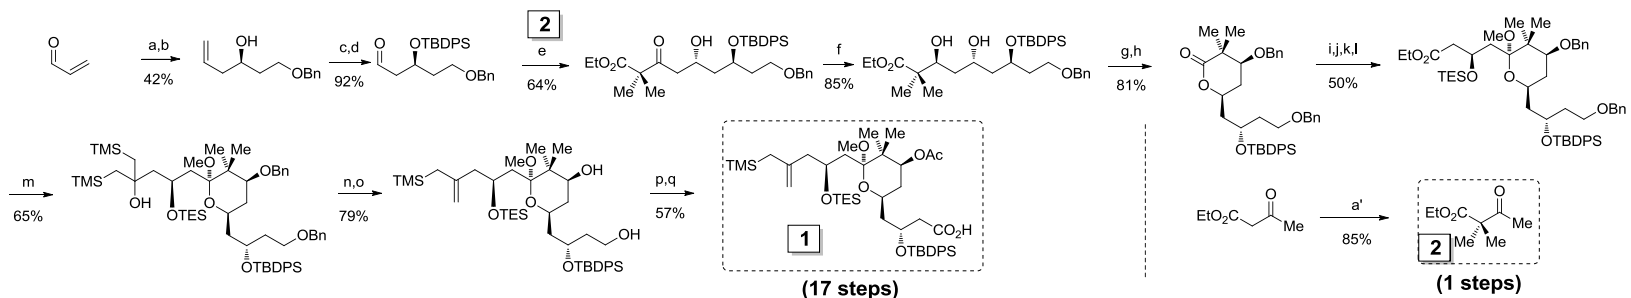

Key : (a) chloroacetic acid, NaOH, benzylalcohol; (b)  $\text{Ti}(\text{O}i\text{Pr})_4$ , (*R*)-BINOL, allyltributyltin; (c) TBBDPSCI, imid.; (d)  $\text{O}_3$ ;  $\text{PPh}_3$ ; (e) Ketone 2, (+)-IpcBCl,  $\text{Et}_3\text{N}$ , then aldehyde; (f)  $\text{Me}_2\text{NBH}(\text{OAc})_3$ , 1:1 HOAc:MeCN,  $-15^\circ\text{C}$ ; (g) CSA, PhH, reflux; (h) BnBr, NaHMDS; (i) Ethyl acetoacetate, LDA,  $-78^\circ\text{C}$ ; (j) PPTS, MeOH,  $40^\circ\text{C}$ ; (k)  $\text{NaBH}_4$ , EtOH,  $-15^\circ\text{C}$ ; (l) TESCl, imid.; (m)  $\text{CeCl}_2 \cdot 2\text{LiCl}$ ,  $\text{TMSCH}_2\text{MgCl}$ ; (n) NaHMDS, THF,  $0^\circ\text{C}$ ; (o) Lithium naphthalenide,  $-30^\circ\text{C}$  -  $-10^\circ\text{C}$ ; (p) TEMPO,  $\text{Ph}(\text{OAc})_2$ , 4:1 MeCN/ $\text{H}_2\text{O}$ ; then  $\text{NaH}_2\text{PO}_4$ ,  $\text{NaClO}_2$ , 2-methyl-2-butene,  $0^\circ\text{C}$ ; (q)  $\text{Ac}_2\text{O}$ , DMAP. (a') MeI,  $\text{K}_2\text{CO}_3$ .

**Fragment 3**

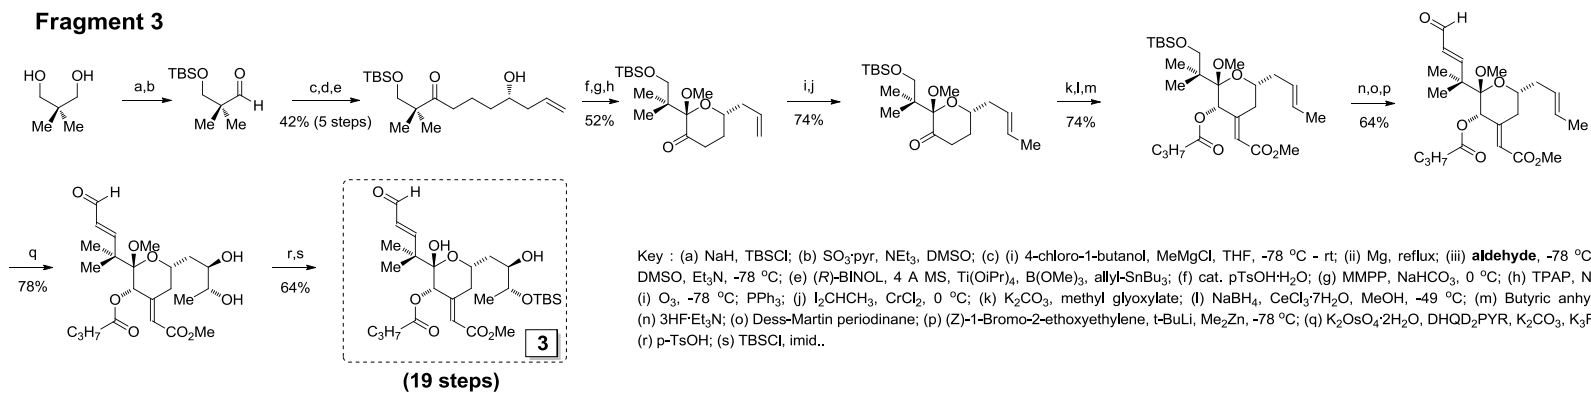

Key : (a) NaH, TBSCl; (b)  $\text{SO}_3$ :pyr,  $\text{NEt}_3$ , DMSO; (c) (i) 4-chloro-1-butanol, MeMgCl, THF,  $-78^\circ\text{C}$  - rt; (ii) Mg, reflux; (iii) aldehyde,  $-78^\circ\text{C}$ ; (d)  $(\text{COCl})_2$ , DMSO,  $\text{Et}_3\text{N}$ ,  $-78^\circ\text{C}$ ; (e) (*R*)-BINOL, 4 A MS,  $\text{Ti}(\text{O}i\text{Pr})_4$ ,  $\text{B}(\text{OMe})_3$ , allyl-SnBu<sub>3</sub>; (f) cat. p-TsOH/ $\text{H}_2\text{O}$ ; (g) MMPP,  $\text{NaHCO}_3$ ,  $0^\circ\text{C}$ ; (h) TPAP, NMO, 4 A MS; (i)  $\text{O}_3$ ,  $\text{Et}_3\text{N}$ ,  $-78^\circ\text{C}$ ;  $\text{PPh}_3$ ; (j)  $\text{I}_2\text{CHCH}_3$ ,  $\text{CrCl}_2$ ,  $0^\circ\text{C}$ ; (k)  $\text{K}_2\text{CO}_3$ , methyl glyoxylate; (l)  $\text{NaBH}_4$ ,  $\text{CeCl}_3 \cdot 7\text{H}_2\text{O}$ , MeOH,  $-49^\circ\text{C}$ ; (m) Butyric anhydride, DMAP; (n)  $3\text{HF} \cdot \text{Et}_3\text{N}$ ; (o) Dess-Martin periodinane; (p) (*Z*)-1-Bromo-2-ethoxyethylene, t-BuLi,  $\text{Me}_2\text{Zn}$ ,  $-78^\circ\text{C}$ ; (q)  $\text{K}_2\text{OsO}_4 \cdot 2\text{H}_2\text{O}$ , DHQD<sub>2</sub>PYR,  $\text{K}_2\text{CO}_3$ ,  $\text{K}_3\text{Fe}(\text{CN})_6$ ,  $4^\circ\text{C}$ ; (r) p-TsOH; (s) TBSCl, imid..

**End Game (Bryostatin 9, Wender)**

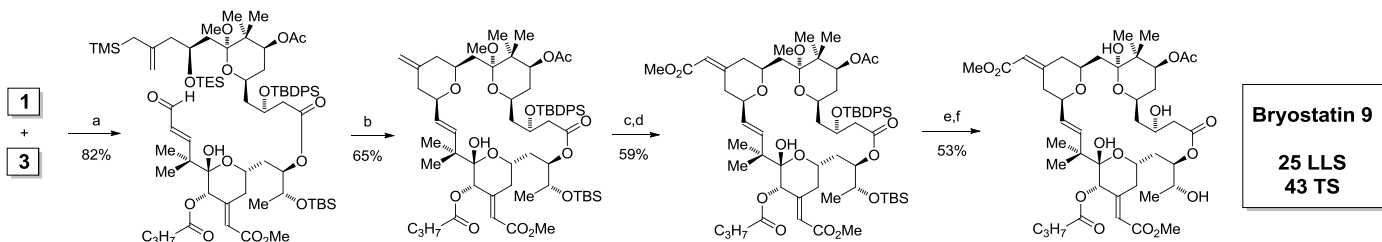

Key : (a) 2,4,6-Trichlorobenzoyl chloride,  $\text{Et}_3\text{N}$ ,  $\text{PhCH}_3$ ; then alcohol 3, DMAP; (b) PPTS, MeOH; (c)  $\text{O}_3$ ,  $-78^\circ\text{C}$ ; then thioure; (d) [(*R*)-BINOL]-P(O)CH<sub>2</sub>CO<sub>2</sub>Me, NaHMDS,  $-78^\circ\text{C}$  to  $4^\circ\text{C}$  (e) HF/py; (f) PPTS, 20%  $\text{H}_2\text{O}$  in THF.

H. Trost *et al. Nature* **2008**, 456, 485.

### Fragment 1

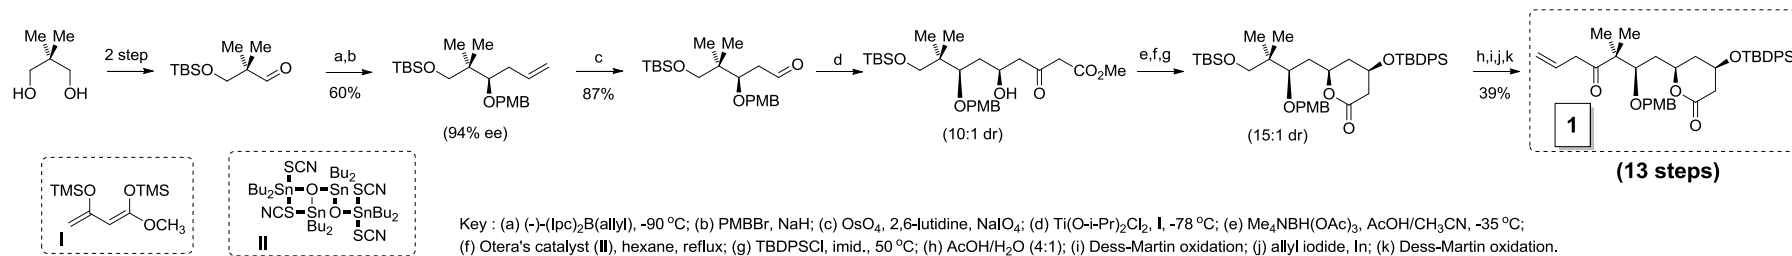

### Fragment 2

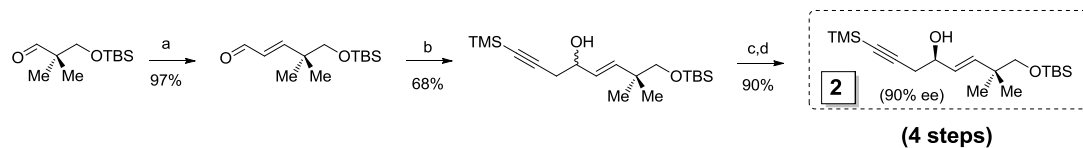

Key : (a) (Z)-1-bromo-2-ethoxyethene, *t*-BuLi, (CH<sub>3</sub>)<sub>2</sub>Zn; aldehyde, -78 °C; NaHSO<sub>4</sub>, rt; (b) (3-bromo-1-propynyl)-trimethylsilane, indium powder, InF<sub>3</sub>, 65 °C; (c) Dess-Martin periodinane, NaHCO<sub>3</sub>; (d) (S)-2-methyl-CBS-oxazaborolidine, catecholborane, -78 °C.

### Fragment 3

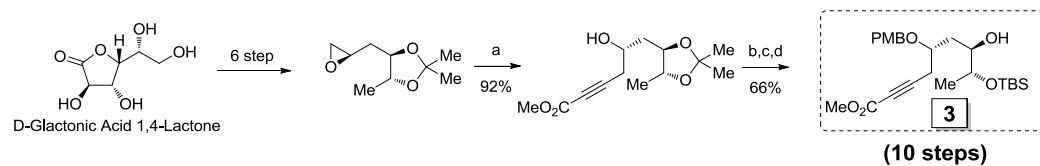

Key : (a) *n*-BuLi, methyl propionate, BF<sub>3</sub>·OEt<sub>2</sub>, -78 °C; (b) Cu(OTf)<sub>2</sub>, PMBOC(NH)CCl<sub>3</sub>, -10 °C; (c) PPTS, MeOH; (d) TBSOTf, 2,6-lutidine.

H. Trost *et al.* *Nature* **2008**, 456, 485. (Cont'd)

Fragment 4

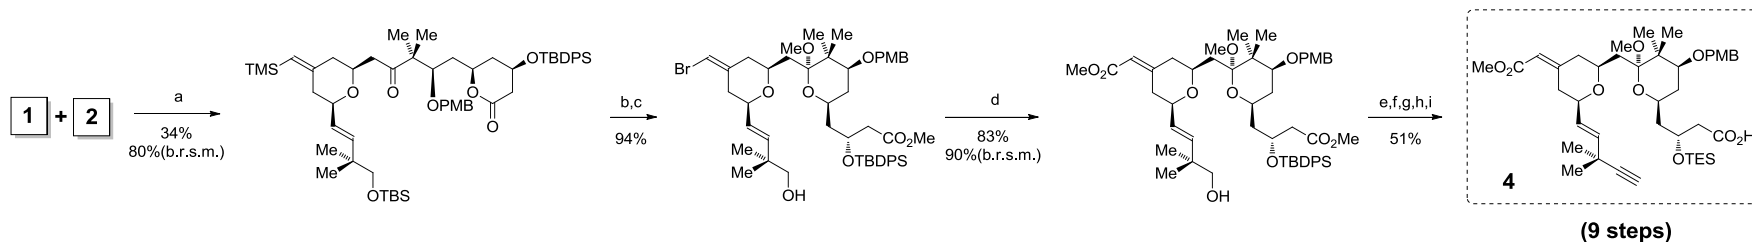

Key : (a) CpRu(CH<sub>3</sub>CN)<sub>3</sub>PF<sub>6</sub>; (b) NBS; (c) CSA, MeOH, 0 °C; (d) PdCl<sub>2</sub>(CH<sub>3</sub>CN)<sub>2</sub>, dppf, CO (1 atm), MeOH, TEA, 80 °C; (e) Dess-Martin periodinane, NaHCO<sub>3</sub>; (f) Ohira-Bestmann reagent, K<sub>2</sub>CO<sub>3</sub>, MeOH; (g) TBAF, AcOH; (h) (CH<sub>3</sub>)<sub>3</sub>SnOH, 80 °C; (i) TESOTf, 2,6-lutidine, -10 °C to 0 °C.

End Game (Bryostatin 16, Trost)

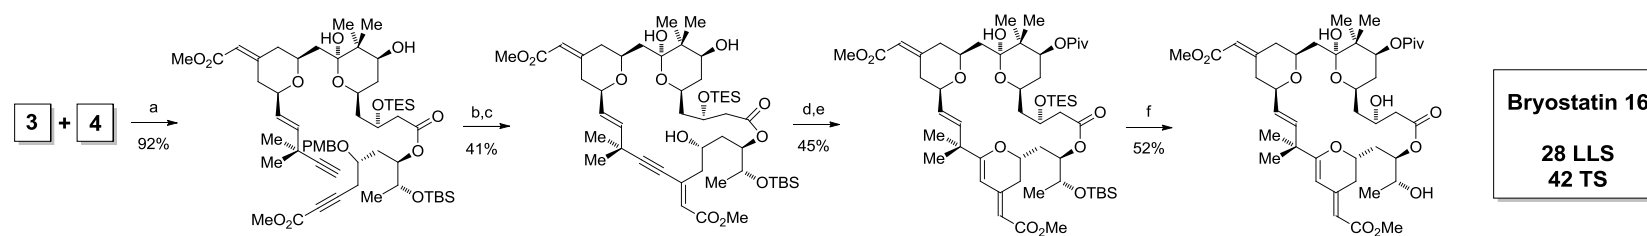

Key : (a) **4**, 2,4,6-trichlorobenzoyl chloride, TEA, then **3**, DMAP; (b) DDQ; (c) Pd(OAc)<sub>2</sub>, TDMPP; (d) AuCl(PPh<sub>3</sub>), AgSbF<sub>6</sub>, NaHCO<sub>3</sub>, 0 °C to rt; (e) Piv<sub>2</sub>O, DMAP, DCM, 50 °C; (f) TBAF.

## Graphical Summary of Previous Syntheses of Swinholide Fragments

A. Paterson *et al. Tetrahedron* **1995**, *51*, 9393.

### Fragment 1

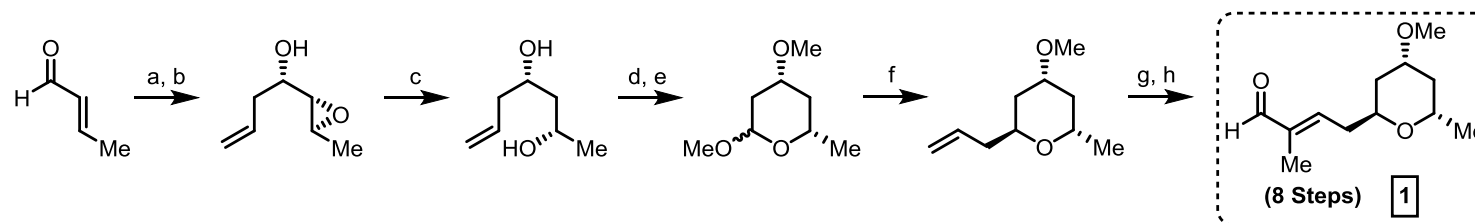

Key: (a) allyl bromide, Zn, DMF; (b) (+)-DIPT, Ti(O*i*Pr)<sub>4</sub>, *t*BuOOH, 4Å MS, CH<sub>2</sub>Cl<sub>2</sub>, then DMS; (c) Red-Al, THF; (d) O<sub>3</sub>, MeOH, then DMS, 1M HCl; (e) NaH, MeI, THF; (f) allyl-TMS, Me<sub>3</sub>SiOTf, MeCN; (g) O<sub>3</sub>, CH<sub>2</sub>Cl<sub>2</sub>, MeOH, NaHCO<sub>3</sub>, then DMS; (h) Ph<sub>3</sub>P=C(Me)CHO, toluene.

### Fragment Union

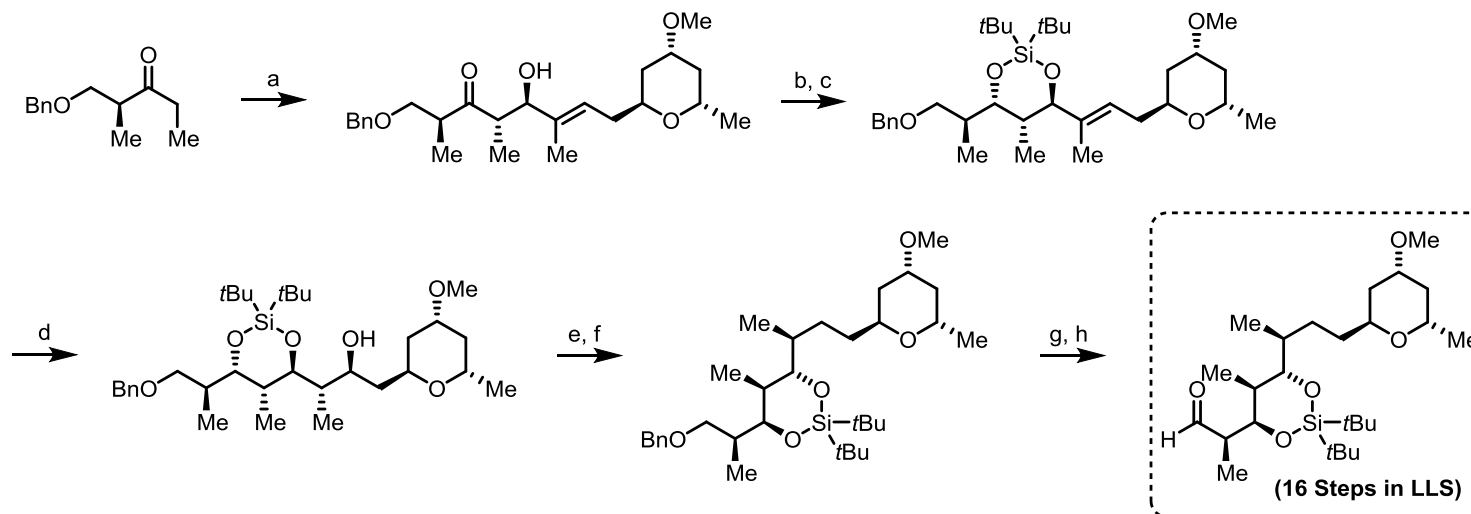

Key: (a) (*c*-C<sub>6</sub>H<sub>11</sub>)<sub>2</sub>BCl, Et<sub>3</sub>N, Et<sub>2</sub>O, then **1**, then H<sub>2</sub>O<sub>2</sub>, pH7 buffer, MeOH; (b) Me<sub>4</sub>NBH(OAc)<sub>3</sub>, AcOH, MeCN; (c) *t*Bu<sub>2</sub>Si(OTf)<sub>2</sub>, 2,6-lutidine, CH<sub>2</sub>Cl<sub>2</sub>; (d) Thexylborane, THF, then H<sub>2</sub>O<sub>2</sub>/NaOH; (e) (Imid)<sub>2</sub>C=S, THF; (f) *n*Bu<sub>3</sub>SnH, toluene; (g) H<sub>2</sub>, Pd/C, EtOH; (h) (COCl)<sub>2</sub>, DMSO, CH<sub>2</sub>Cl<sub>2</sub>, then Et<sub>3</sub>N.



C. Miyashita *et al. Org. Lett.* **2003**, *5*, 3579; *Org. Lett.* **2005**, *7*, 2929.

### Fragment 1

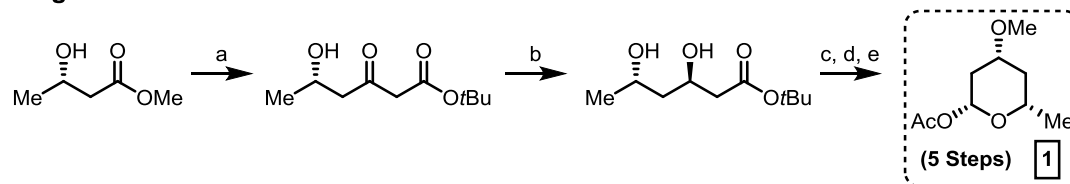

Key: (a)  $\text{CH}_3\text{CO}_2t\text{Bu}$ , LDA, THF; (b)  $\text{Me}_4\text{NBH}(\text{OAc})_3$ , AcOH,  $\text{CH}_3\text{CN}$ ; (c) PPTS,  $\text{ClCH}_2\text{CH}_2\text{Cl}$ ; (d) MeI,  $\text{Ag}_2\text{O}$ , 4A MS,  $\text{Et}_2\text{O}$ ,  $\text{CH}_2\text{Cl}_2$ ; (e) DIBAL,  $\text{CH}_2\text{Cl}_2$ , then pyridine, DMAP,  $(\text{CH}_3\text{CO})_2\text{O}$ .

### Fragment 2

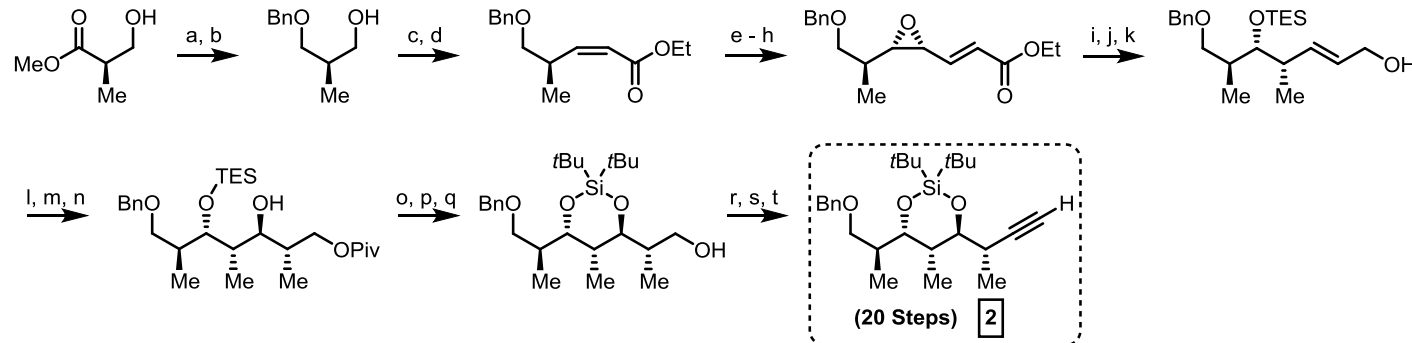

Key: (a)  $\text{BnOC}(\text{=NH})\text{CCl}_3$ , TfOH,  $\text{CH}_2\text{Cl}_2$ ; (b)  $\text{LiAlH}_4$ , THF; (c) DMSO,  $(\text{COCl})_2$ ,  $\text{CH}_2\text{Cl}_2$ , then  $\text{Et}_3\text{N}$ ; (d) di-*o*-tolyl ethoxycarbonyl-methyl phosphate, NaH, THF; (e) DIBAL, THF; (f) *m*-CPBA,  $\text{CH}_2\text{Cl}_2$ ; (g) DMSO,  $(\text{COCl})_2$ ,  $\text{CH}_2\text{Cl}_2$ , then  $\text{Et}_3\text{N}$ ; (h) triethyl phosphonoacetate, NaH, THF; (i)  $(\text{CH}_3)_3\text{Al}$ ,  $\text{CH}_2\text{Cl}_2$ , then  $\text{H}_2\text{O}$ ; (j) TESCl, DMAP, imidazole,  $\text{CH}_2\text{Cl}_2$ ; (k) DIBAL, THF; (l) *m*-CPBA,  $\text{CH}_2\text{Cl}_2$ ; (m)  $\text{Me}_3\text{CuLi}$ ,  $\text{Et}_2\text{O}$ ; (n) *t*-BuCOCl, pyridine,  $\text{CH}_2\text{Cl}_2$ ; (o) TBAF, THF; (p)  $t\text{Bu}_2\text{Si}(\text{OTf})_2$ , 2,6-lutidine,  $\text{CH}_2\text{Cl}_2$ ; (q) DIBAL, THF; (r) DMSO,  $(\text{COCl})_2$ ,  $\text{CH}_2\text{Cl}_2$ , then  $\text{Et}_3\text{N}$ ; (s)  $\text{Ph}_3\text{P}$ ,  $\text{CBr}_4$ , pyridine,  $\text{CH}_2\text{Cl}_2$ ; (t) BuLi, THF.

### Fragment Union

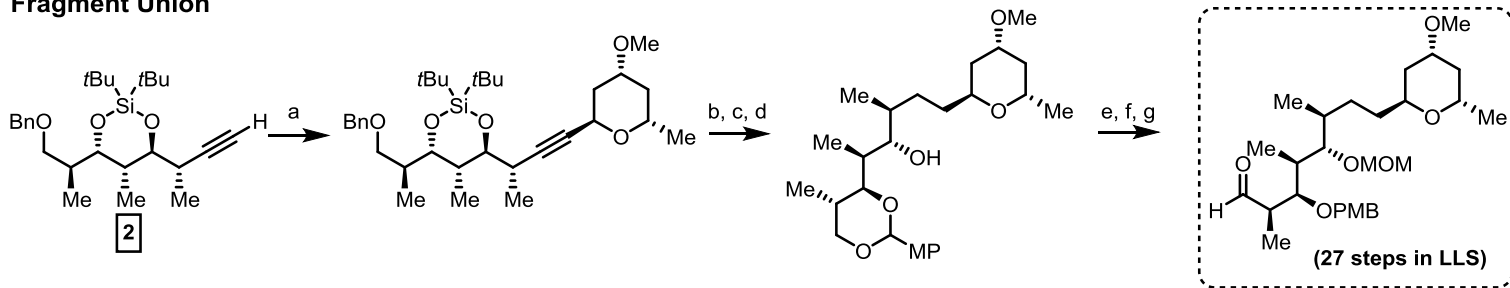

Key: (a) BuLi,  $\text{Me}_2\text{AlOTf}$ , then 1,  $\text{CH}_2\text{Cl}_2$ ; (b)  $\text{H}_2$ ,  $\text{Pd}(\text{OH})_2/\text{C}$ , AcOEt; (c) HF-Py, THF; (d) 4-MeOC<sub>6</sub>H<sub>4</sub>CH(OMe)<sub>2</sub>, CSA, DMF; (e) MOMCl, *i*Pr<sub>2</sub>NEt, DCE; (f) DIBAL,  $\text{CH}_2\text{Cl}_2$ ; (g) Dess-Martin periodinane,  $\text{CH}_2\text{Cl}_2$ .

## Graphical Summary of Previous Syntheses of Erythromycins

A. Woodward *et al.* *J. Am. Chem. Soc.* **1981**, *103*, 3210.

### Fragment 1 and 2

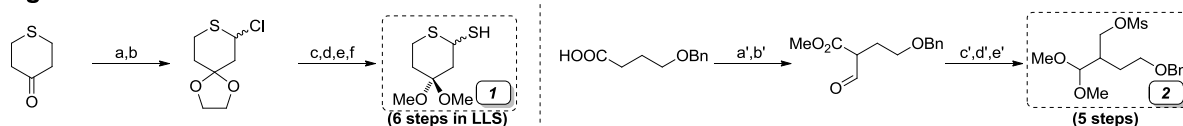

Key: (a) HOCH<sub>2</sub>CH<sub>2</sub>OH, TsOH; (b) NCS; (c) thiourea; (d) aq. NaOH; (e) aq. HCl; (f) HC(OMe)<sub>3</sub>, TsOH (a') conc. H<sub>2</sub>SO<sub>4</sub>, MeOH; (b') HCOOH, LDA; (c') conc. H<sub>2</sub>SO<sub>4</sub>, MeOH; (d') LAH; (e') MsCl, Py

### Fragment Union, Fragment 3 and 4

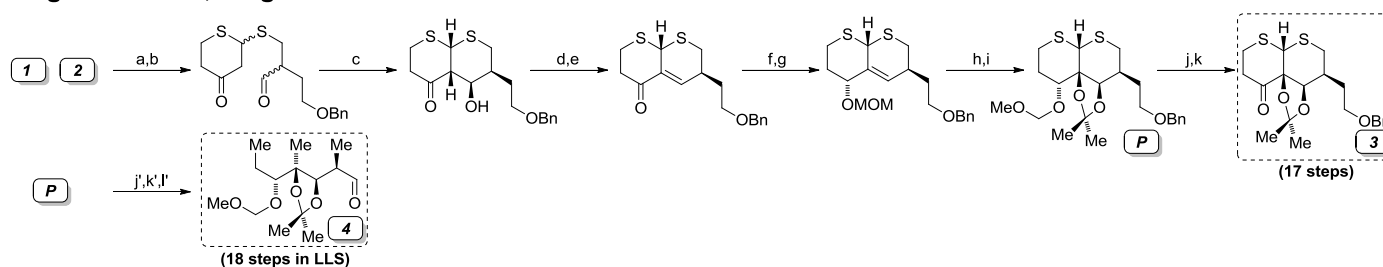

Key: (a) NaH, DMSO; (b) AcOH; (c) D-Proline; (d) MsCl, Py; (e) alumina, EtOH; (f) NaBH<sub>4</sub>; (g) MOMI, KH; (h) OsO<sub>4</sub>, NaHSO<sub>4</sub>, Py; (i) Me<sub>2</sub>C(OMe)<sub>2</sub>, TsOH; (j) TFA; (k) TFAA, DMSO (j') Raney-Ni, H<sub>2</sub>; (k') *o*-NO<sub>2</sub>C<sub>6</sub>H<sub>4</sub>SeCN, PBu<sub>3</sub>, then H<sub>2</sub>O<sub>2</sub>; (l') O<sub>3</sub>, then Me<sub>2</sub>S

### Fragment Union

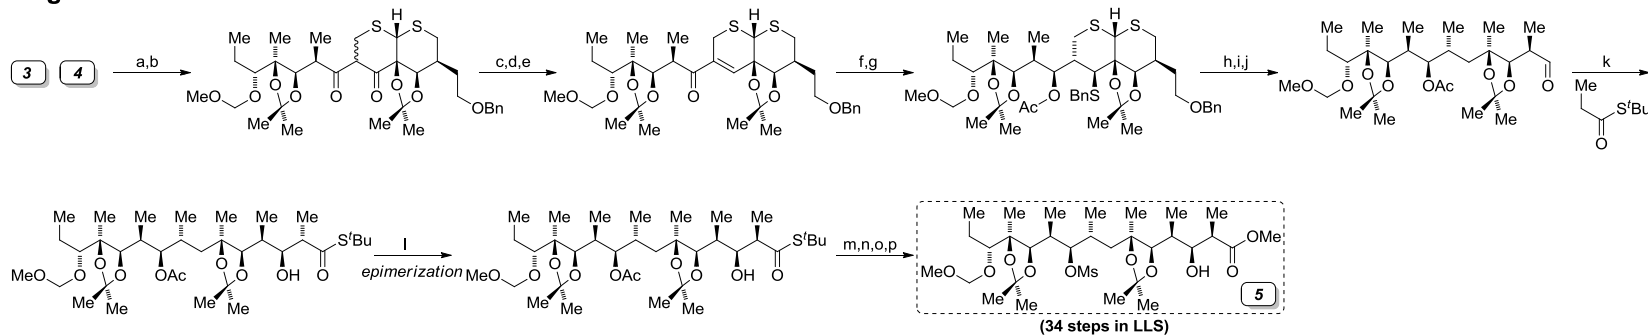

Key: (a) mesityl-Li; (b) TFAA, DMSO, *i*Pr<sub>2</sub>NEt; (c) KH, AcCl; (d) NaBH<sub>4</sub>; (e) MsCl, Py; (f) BnSH, BuLi; (g) LAH; (h) Raney-Ni, H<sub>2</sub>; (i) *o*-NO<sub>2</sub>C<sub>6</sub>H<sub>4</sub>SeCN, PBu<sub>3</sub>, then H<sub>2</sub>O<sub>2</sub>; (j) O<sub>3</sub>, then Me<sub>2</sub>S; (k) LDA; (l) *t*BuLi, then AcOH; (m) Na<sub>2</sub>CO<sub>3</sub>; (n) Bz<sub>2</sub>O, Py; (o) MsCl, Py; (p) LiOH, H<sub>2</sub>O<sub>2</sub>

A. Woodward *et al.* *J. Am. Chem. Soc.* **1981**, *103*, 3210. (Cont'd)

### Glycosidating Reagents S1 and S2

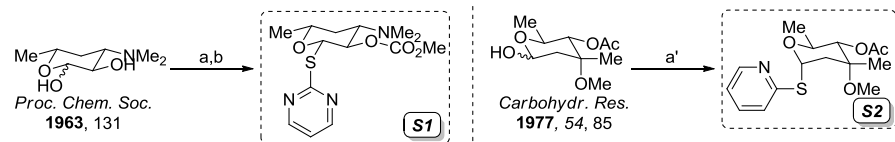

Key: (a) 2-mercaptopyrimidine, DEAD, PBU<sub>3</sub>; (b) ClCOOMe, NaHCO<sub>3</sub>  
(a') (2-PyS)<sub>2</sub>, PBU<sub>3</sub>

### Macrocyclization

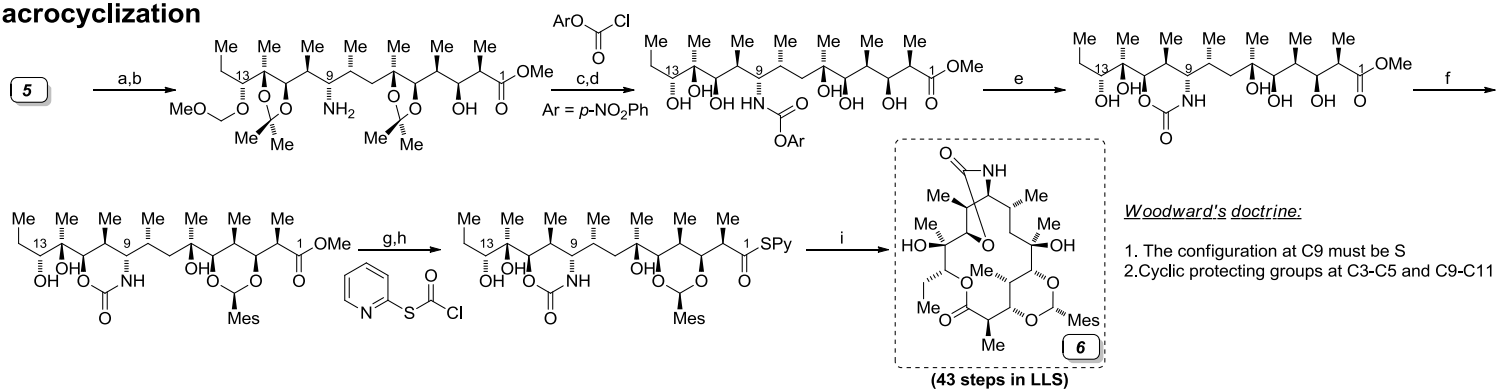

*Woodward's doctrine:*

1. The configuration at C9 must be S
2. Cyclic protecting groups at C3-C5 and C9-C11

(43 steps in LLS)

Key: (a) LiN<sub>3</sub>, HMPA; (b) PtO<sub>2</sub>, H<sub>2</sub>; (c) Na<sub>2</sub>CO<sub>3</sub>; (d) NH<sub>2</sub>OH-HCl, KH<sub>2</sub>PO<sub>4</sub>; (e) TEA; (f) methyl-CH(OMe)<sub>2</sub>, CSA; (g) EtSH, BuLi, HMPA; (h) TEA; (i) PPh<sub>3</sub>, heat

### Glycosidation and End Game

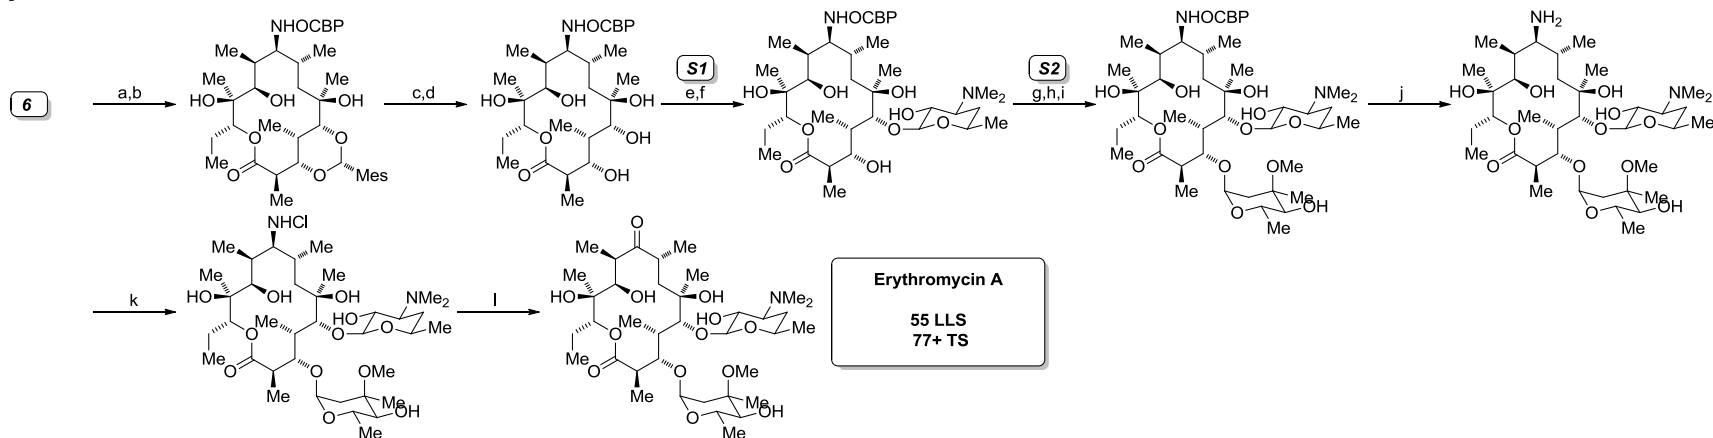

Key: (a) BPCl, TEA, DMAP; (b) NaOH, H<sub>2</sub>O; (c) SiO<sub>2</sub>, aq. TFA; (d) NH<sub>2</sub>OH-HCl, KH<sub>2</sub>PO<sub>4</sub>; (e) AgOTf; (f) MeOH; (g) ClCO<sub>2</sub>Me, NaHCO<sub>3</sub>; (h) Pb(ClO<sub>4</sub>)<sub>2</sub>, MeCN; (i) MeOH; (j) Na-Hg/MeOH; (k) NCS, Py; (l) AgF, HMPA



B. Martin *et al.* *J. Am. Chem. Soc.* **1997**, *119*, 3193; *Tetrahedron* **2007**, *63*, 5709.

### Chiral Auxiliary and Sugar

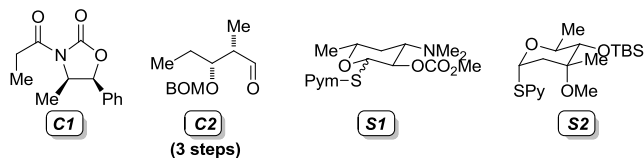

### Functionalization of Furan

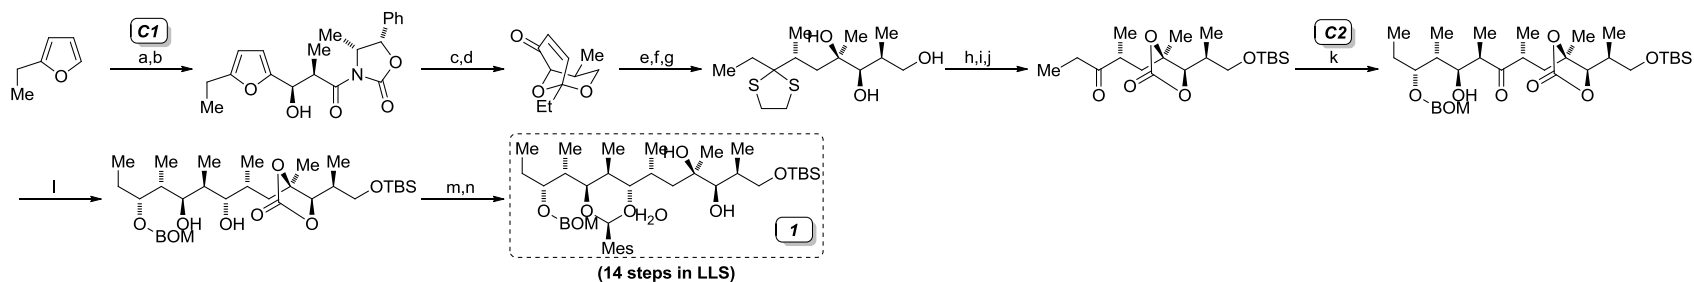

Key: (a) BuLi; (b) Bu<sub>2</sub>BOTf; (c) LiBH<sub>4</sub>; (d) Br<sub>2</sub>; (e) LiCuMe<sub>2</sub>; (f) MeLi-CeCl<sub>3</sub>; (g) PPTS; (h) TBSCl; (i) CDI; (j) Hg(ClO<sub>4</sub>)<sub>2</sub>, CaCO<sub>3</sub>; (k) LHMDS; (l) Me<sub>4</sub>NBH(OAc)<sub>3</sub>; (m) Me<sub>3</sub>C<sub>6</sub>H<sub>2</sub>CH(OMe)<sub>2</sub>, CSA; (n) LiBH<sub>4</sub>

### Glycosylation

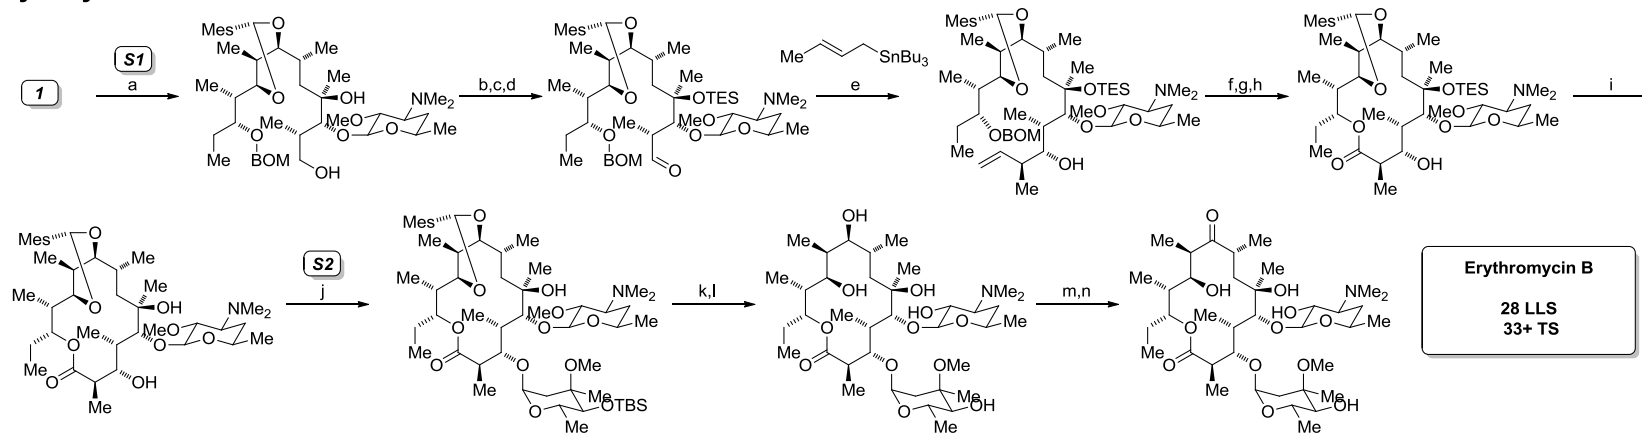

Key: (a) AgOTf, 2,6-*t*Bu<sub>2</sub>Py; (b) TBAF; (c) TESOTf, *i*Pr<sub>2</sub>NEt; (d) (COCl)<sub>2</sub>, DMSO, TEA; (e) BF<sub>3</sub>-OEt<sub>2</sub>; (f) OsO<sub>4</sub>, Oxone, NaHCO<sub>3</sub>; (g) Pd/C, HClO<sub>4</sub>; (h) 2,4,6-trichlorobenzoyl chloride, TEA, then DMAP; (i) TBAF; (j) Cu(OTf)<sub>2</sub>, CuO; (k) AcOH; (l) TBAF; (m) Dess-Martin Periodate; (n) MeOH, heating

C. Corey et al. *J. Am. Chem. Soc.* **1979**, *101*, 7131.

### Fragment 1

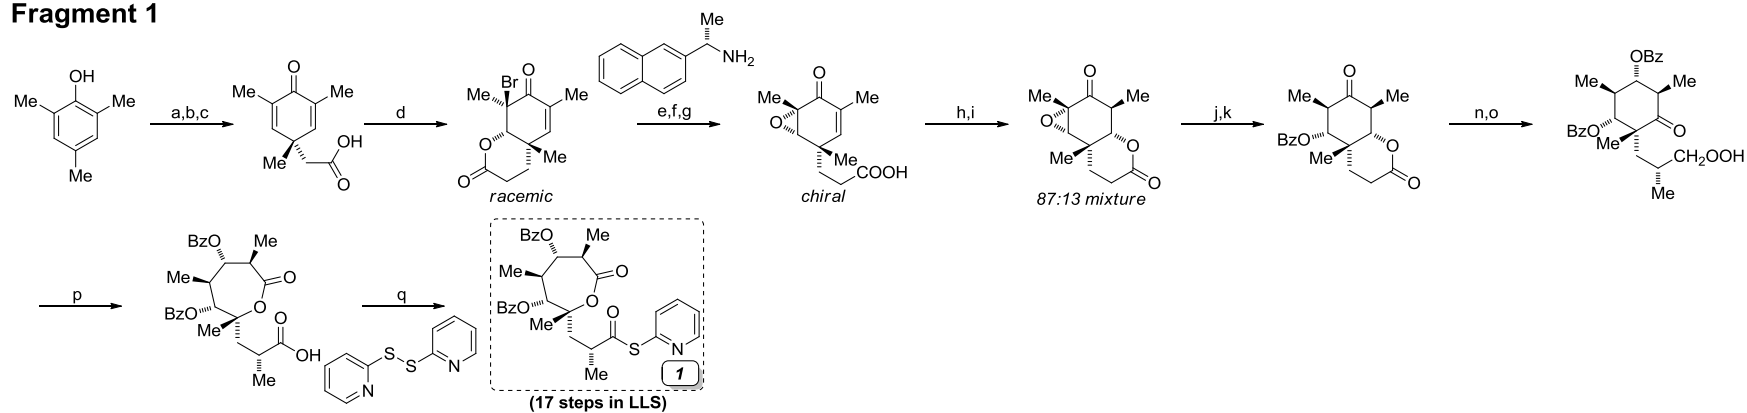

Key: (a) Allyl-Br, NaOMe; (b)  $\text{BH}_3 \cdot \text{THF}$ ,  $\text{H}_2\text{O}_2$ , NaOH; (c)  $\text{CrO}_3$ ,  $\text{H}_2\text{SO}_4$ ; (d)  $\text{Br}_2$ , KBr; (e) KOH; (f) Amine, recrystallization; (g) MsOH; (h)  $\text{Br}_2$ , KBr; (i)  $\text{Bu}_3\text{SnH}$ , AIBN; (j)  $\text{H}_2$ ,  $\text{Pd}(\text{OH})_2/\text{C}$ , HOAc-THF; (k) BzCl, Py; (l)  $\text{Zn}(\text{BH}_4)_2$ ,

### Fragment 2

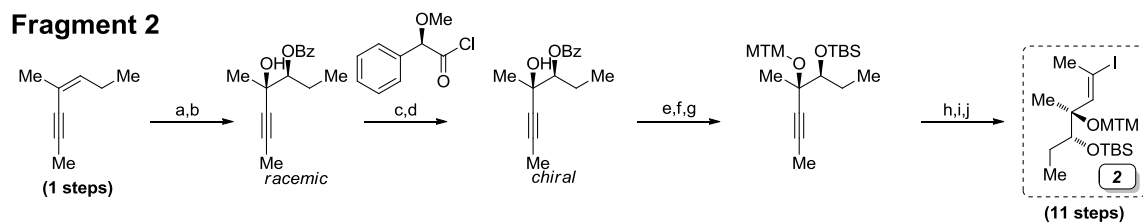

Key: (a) NMO,  $\text{OsO}_4$ , THF- $\text{H}_2\text{O}$ ; (b) BzCl, Py; (c) DMAP; (d) water associate  $\text{P}_{500}$ ; (e)  $\text{Ac}_2\text{O}$ , DMSO, HOAc; (f) KOH,  $\text{H}_2\text{O}$ , MeOH; (g) TBSCl, DMAP, DMF; (h)  $\text{Cy}_2\text{BH}$ , then  $\text{Et}_3\text{NO}$ ; (i)  $\text{Hg}(\text{OAc})_2$ , NaCl; (j)  $\text{I}_2$ , Py

### Coupling Fragment 1 and 2

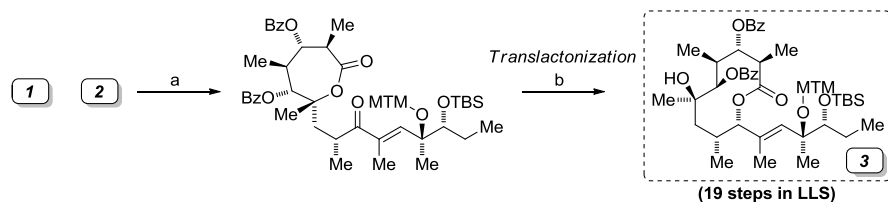

Key: (a) BuLi,  $\text{MgBr}_2$ ; (b)  $\text{Zn}(\text{BH}_4)_2$

C. Corey et al. *J. Am. Chem. Soc.* **1979**, *101*, 7131. (Cont'd)

End Game

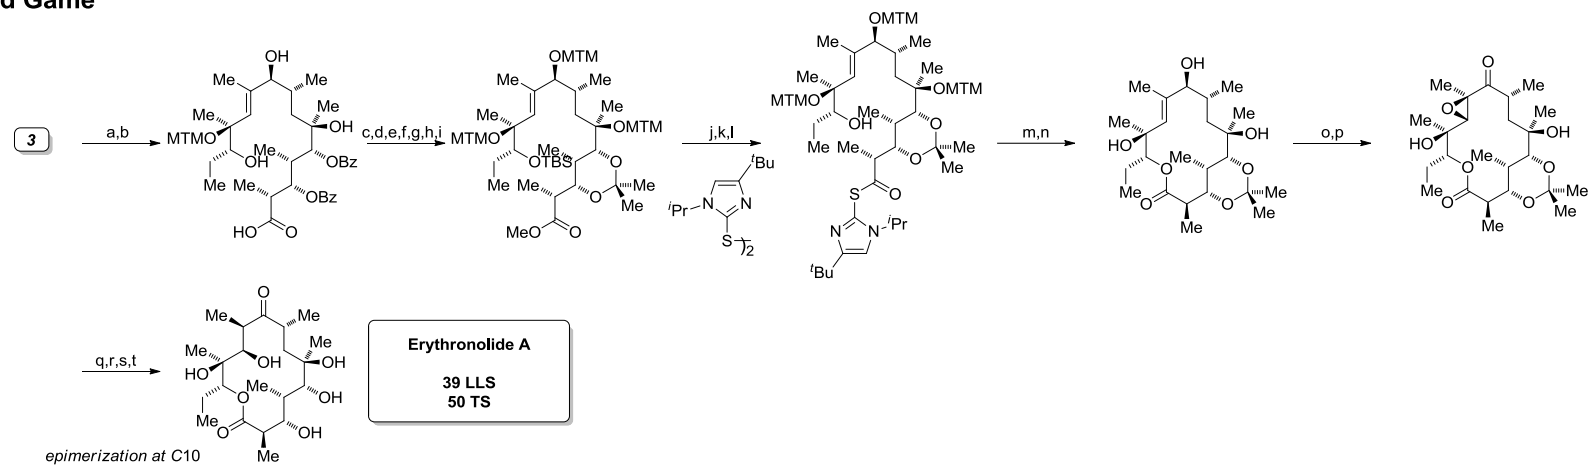

Key: (a) AcOH; (b) LiOH, H<sub>2</sub>O<sub>2</sub>; (c) KOH; (d) CH<sub>2</sub>N<sub>2</sub>; (e) Me<sub>2</sub>C(OMe)<sub>2</sub>, Amberlite-50; (f) Ac<sub>2</sub>O, DMAP; (g) Ac<sub>2</sub>O-DMSO-HOAc; (h) K<sub>2</sub>CO<sub>3</sub>; (i) Ac<sub>2</sub>O-DMSO-HOAc; (j) NaOH, MeOH; (k) TBAF, THF; (l) PPh<sub>3</sub>; (m) heating; (n) K<sub>2</sub>CO<sub>3</sub>, MeI, H<sub>2</sub>O, THF; (o) mCPBA; (p) PCC; (q) Pd/C, H<sub>2</sub>, (r) CH<sub>2</sub>=C(Me)OMe, CSA; (s) Triton B methoxide; (t) PPTS, MeOH

D. Kinoshita *et al. Bull. Chem. Soc. Jpn.* **1989**, *62*, 2618.

**Fragment 1**

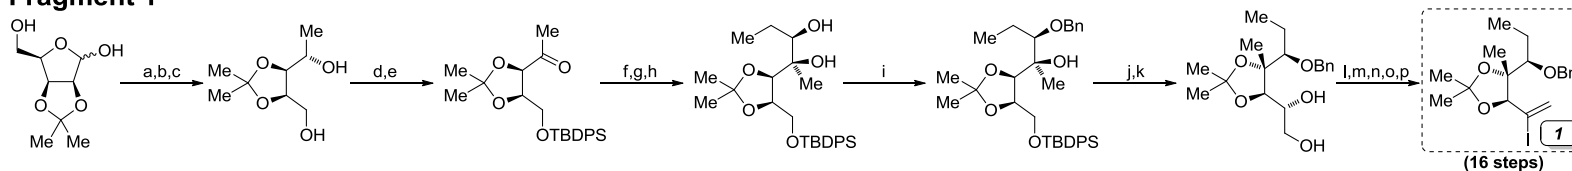

Key: (a) MeMgI; (b) NaIO<sub>4</sub>; (c) LiAlH<sub>4</sub>; (d) TBDPSCI, imidazole; (e) PCC; (f) vinylmagnesium bromide; (g) O<sub>3</sub>, PPH<sub>3</sub>; (h) EtMgBr; (i) NaH, BnBr; (j) FeCl<sub>3</sub>, acetone; (k) TBAF; (l) NaIO<sub>4</sub>; (m) MeMgI; (n) PCC; (o) NH<sub>2</sub>NH<sub>2</sub>·H<sub>2</sub>O, TEA; (p) I<sub>2</sub>, tetramethylguanidine

**Fragment 2**

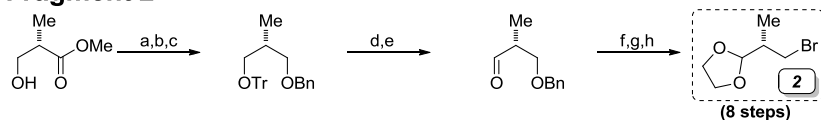

Key: (a) TrCl, TEA, DMAP; (b) LAH; (c) NaH, BnBr; (d) amberlyst<sup>15</sup>; (e) (COCl)<sub>2</sub>, TEA, DMSO; (f) HOCH<sub>2</sub>CH<sub>2</sub>OH, TsOH; (g) H<sub>2</sub>, Pd/C; (h) EtBr, PPH<sub>3</sub>, DEAD

**Fragment 3**

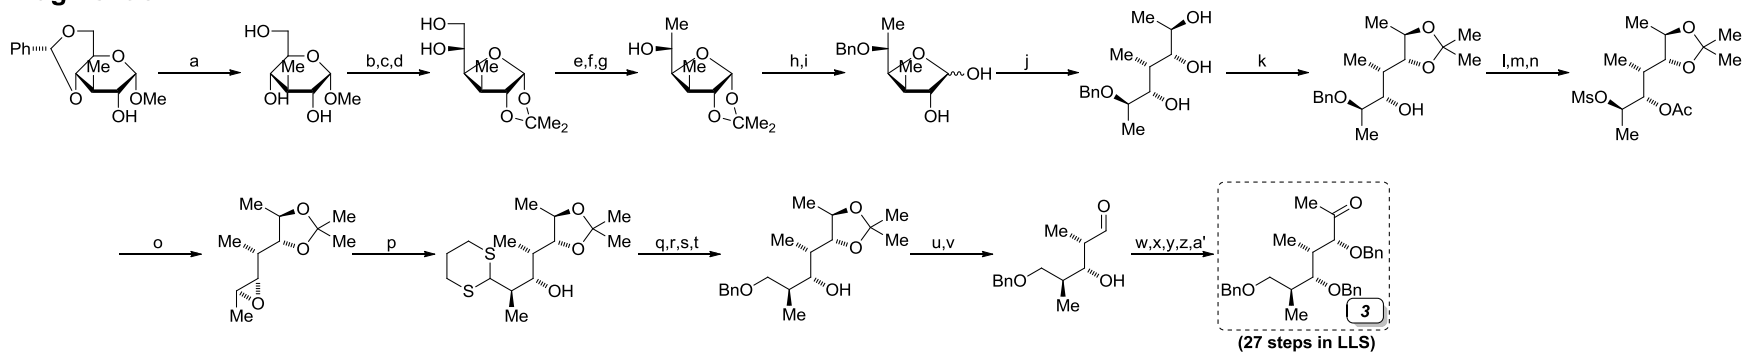

Key: (a) HCl, MeOH; (b) TsOH, acetone; (c) HCl, H<sub>2</sub>O; (d) FeCl<sub>3</sub>, acetone; (e) TsCl, Py; (f) NaOH; (g) LAH; (h) NaH, BnBr; (i) HCl, H<sub>2</sub>O; (j) MeMgBr; (k) MeC(OMe)<sub>2</sub>, TsOH; (l) Ac<sub>2</sub>O, DMAP; (m) H<sub>2</sub>, Pd/C; (n) MsCl, Py; (o) LiOH, H<sub>2</sub>O; (p) BuLi; (q) Ac<sub>2</sub>O, TEA; (r) HgCl<sub>2</sub>; (s) LAH; (t) NaH, BnBr; (u) HCl, H<sub>2</sub>O; (v) NaIO<sub>4</sub>; (w) (EtS)<sub>2</sub>CH<sub>2</sub>, BuLi; (x) NaH, BnBr; (y) HgCl<sub>2</sub>; (z) MeMgBr; (a') PCC

**Fragment Union**

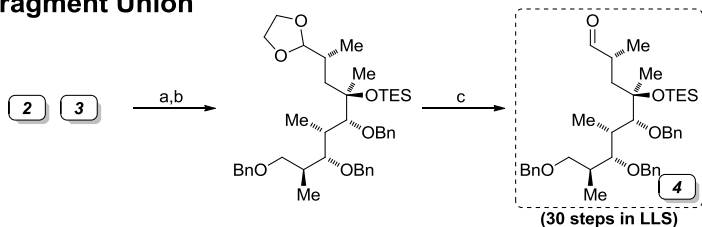

Key: (a) Mg; (b) TESOTf, 2,6-lutidine; (c) SnCl<sub>2</sub>, acetone

D. Kinoshita *et al. Bull. Chem. Soc. Jpn.* **1989**, *62*, 2618. (Cont'd)

End Game

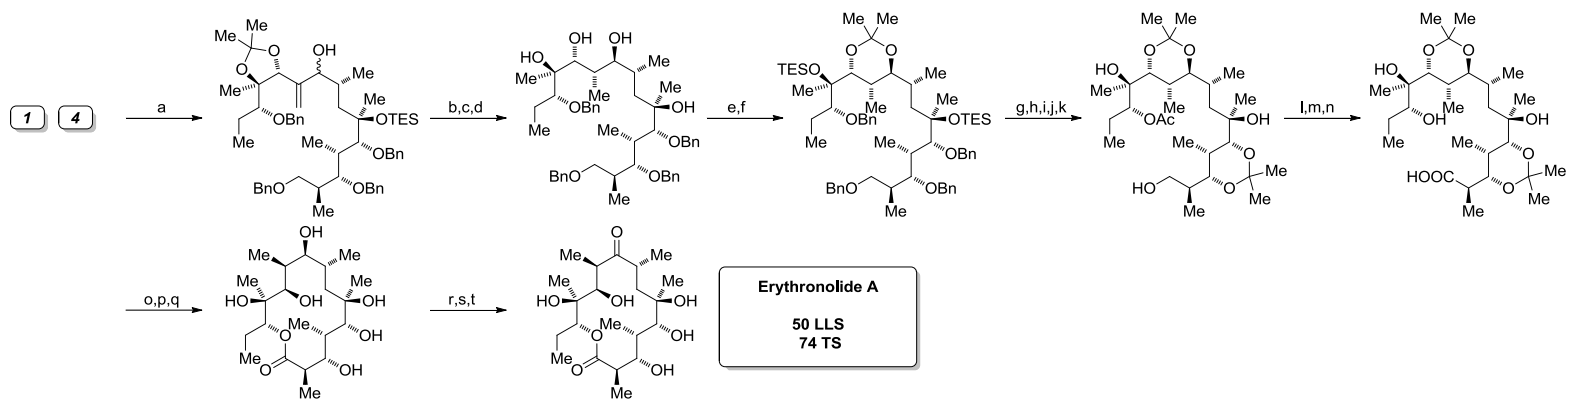

Key: (a) BuLi; (b)  $\text{CIRh}(\text{PPh}_3)_3$ , 50 atm  $\text{H}_2$ ; (c) TBAF; (d) HCl,  $\text{H}_2\text{O}$ ; (e) TsOH, acetone; (f) TESOTf, TEA; (g) Pd/C,  $\text{H}_2$ ; (h) TBDPSCI, TEA; (i) TsOH, acetone; (j)  $\text{Ac}_2\text{O}$ , TEA; (k) TBAF; (l)  $(\text{COCl})_2$ , TEA, DMSO; (m)  $\text{NaClO}_2$ ; (n) LiOH,  $\text{H}_2\text{O}$ ; (o)  $(2\text{-pyr})_2\text{S}_2$ ; (p)  $\text{CuOAc}$ ; (q) AcOH; (r)  $\text{PhCH}(\text{OMe})_2$ , CSA; (s) PCC; (t)  $\text{H}_2$ , Pd/C

E. Carreira *et al.* *Angew. Chem. Int. Ed.* **2005**, *44*, 4036; *J. Org. Chem.* **2009**, *74*, 8695.

### Fragment 1, 2, 3

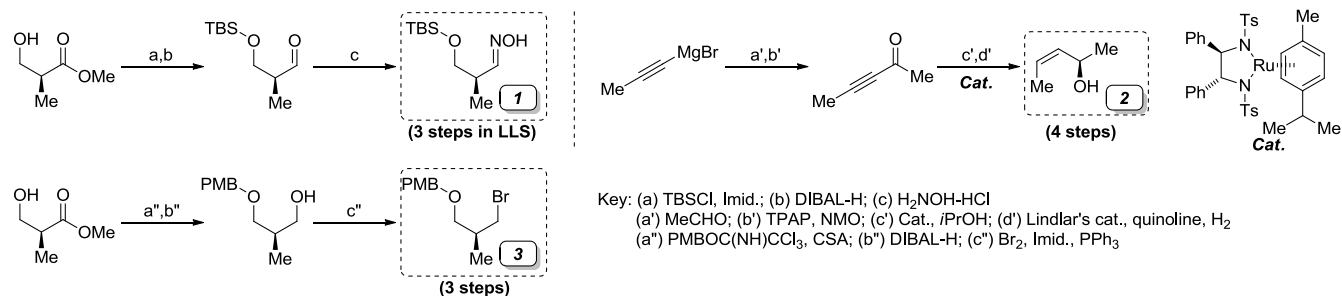

### Fragment Union

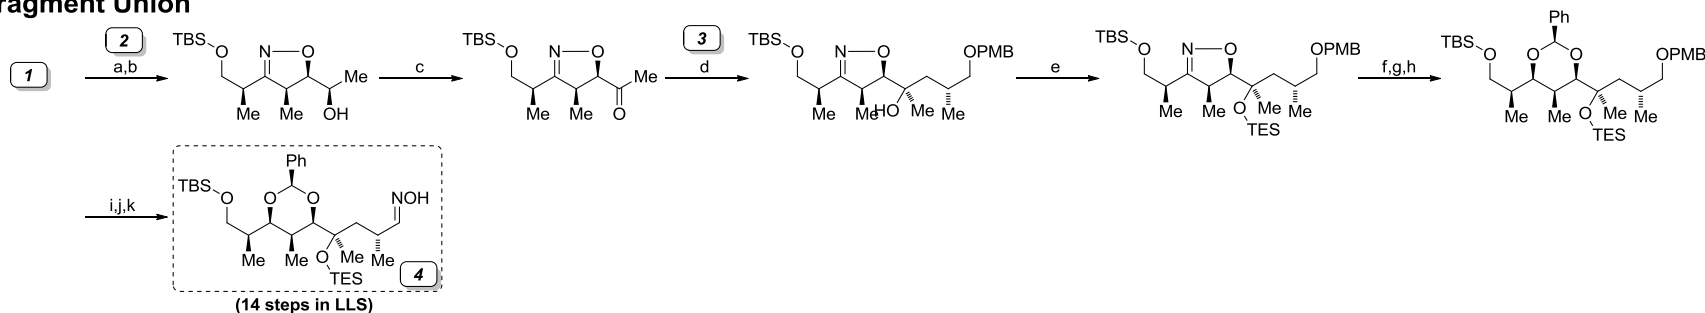

Key: (a) *t*BuOCl; (b) *i*PrOH, ErMgBr; (c) TPAP, NMO; (d) THF; (e) TESOTf, 2,6-lutidine; (f) Raney-Ni, B(OH)<sub>3</sub>, H<sub>2</sub>; (g) Zn(BH<sub>4</sub>)<sub>2</sub>; (h) PhCH(OMe)<sub>2</sub>, CSA; (i) DDQ; (j) TEMPO, NaOCl; (k) H<sub>2</sub>NOH-HCl, Py

### Seco Acid and End Game

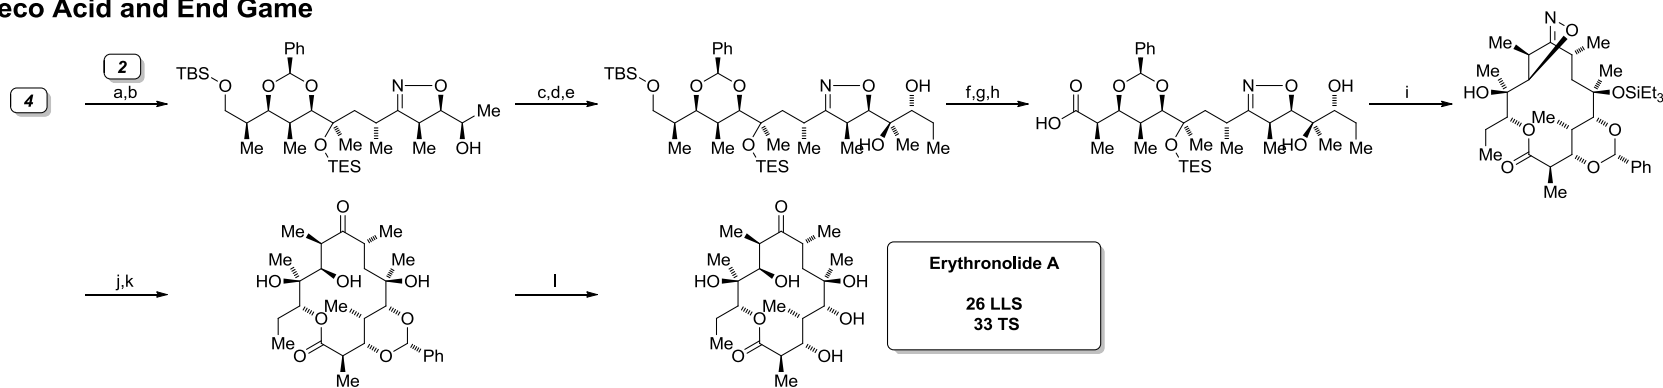

Key: (a) *t*BuOCl; (b) *i*PrOH, ErMgBr; (c) TEMPO, NaOCl, KBr; (d) PrPPh<sub>3</sub>Br, *t*BuLi; (e) (DHQD)<sub>2</sub>PHAL, K<sub>3</sub>[Fe(CN)<sub>6</sub>], MeSO<sub>3</sub>NH<sub>2</sub>, K<sub>2</sub>CO<sub>3</sub>, K<sub>2</sub>O<sub>8</sub>O<sub>4</sub>; (f) HF-Py, Py; (g) TEMPO, NaOCl, KBr; (h) NaClO<sub>2</sub>, 2-methyl-2-butene; (i) 2,4,6-trichlorobenzoyl chloride, TEA, then DMAP; (j) HF-NEt<sub>3</sub>, NEt<sub>3</sub>; (k) Raney-Ni, AcOH, H<sub>2</sub>; (l) Pd(OAc)<sub>2</sub>, MeOH, H<sub>2</sub>

F. Corey *et al.* *J. Am. Chem. Soc.* **1978**, *100*, 5620.

### Fragment 1

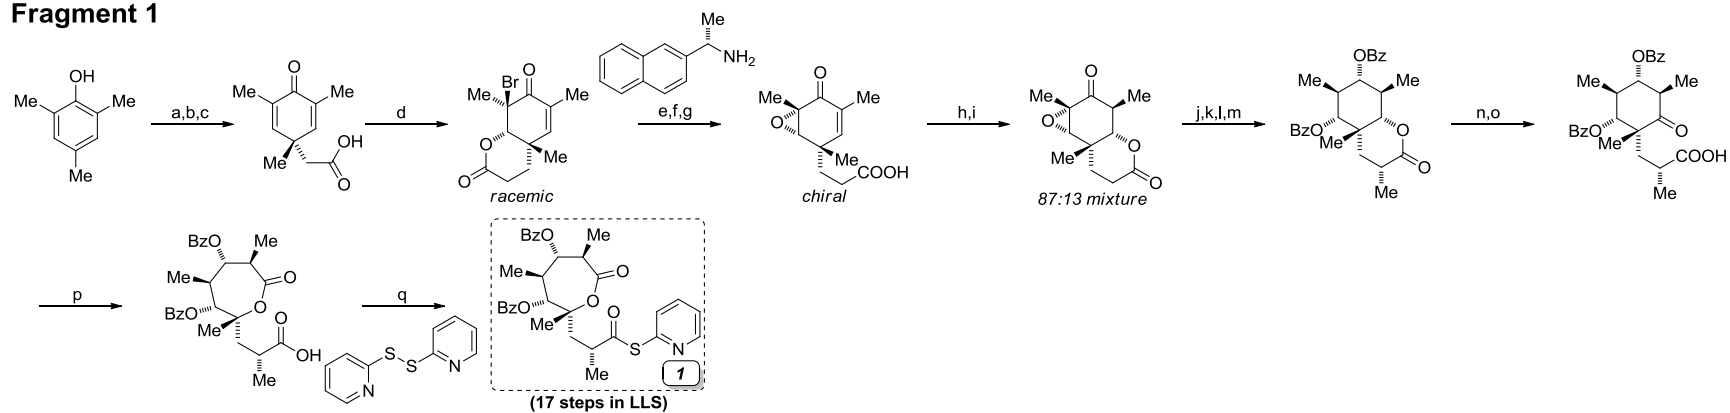

Key: (a) Allyl-Br, NaOMe; (b)  $\text{BH}_3 \cdot \text{THF}$ ,  $\text{H}_2\text{O}_2$ , NaOH; (c)  $\text{CrO}_3$ ,  $\text{H}_2\text{SO}_4$ ; (d) Br<sub>2</sub>, KBr; (e) KOH; (f) Amine, recrystallization; (g) MsOH; (h) Br<sub>2</sub>, KBr; (i)  $\text{Bu}_3\text{SnH}$ , AIBN; (j) Al/Hg; (k) H<sub>2</sub>, Raney-Ni; (l) BzCl, Py; (m) MeI, LDA, HMPA; (n) LiOH; (o)  $\text{CrO}_3$ ,  $\text{H}_2\text{SO}_4$ ; (p) AcOH; (q) PPh<sub>3</sub>

### Fragment 2

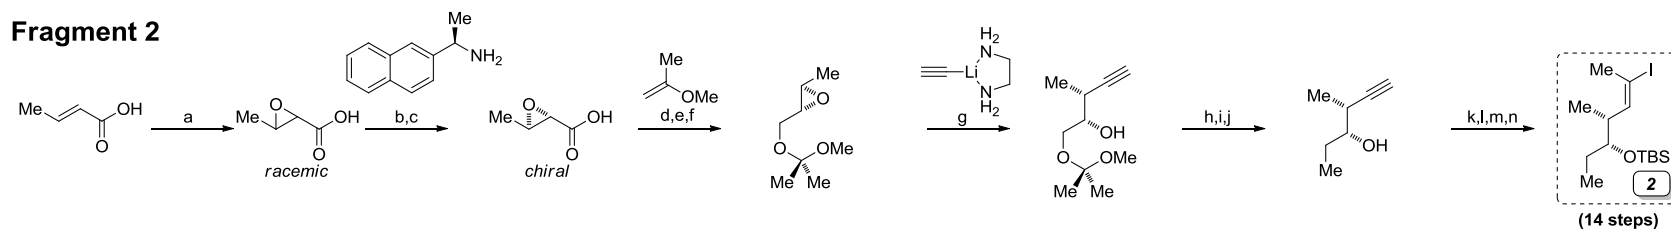

Key: (a)  $\text{H}_2\text{O}_2$ ,  $\text{Na}_2\text{WO}_4$ ; (b) Amine, recrystallization; (c) MsOH; (d)  $\text{ClCO}_2\text{Et}$ , TEA; (e)  $\text{NaBH}_4$ ; (f)  $\text{POCl}_3$ ; (g) Lithium reagent; (h) Amberlite-50; (i) MsCl, Py; (j)  $\text{Me}_2\text{CuLi}$ ; (k) TBSCl, Imidazole; (l) LDA, MeI; (m)  $\text{Cp}_2\text{ZrHCl}$ ; (n) I<sub>2</sub>,  $\text{CCl}_4$

### Coupling Fragment 1 and 2

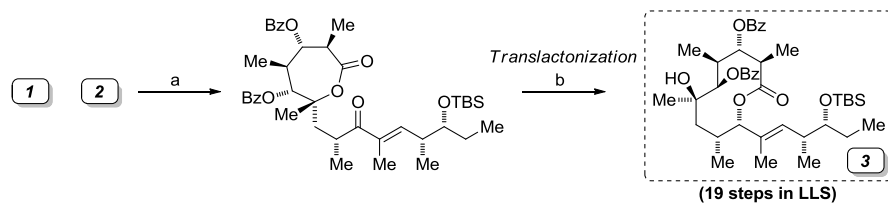

Key: (a) BuLi,  $\text{MgBr}_2$ ; (b)  $\text{Zn}(\text{BH}_4)_2$

F. Corey *et al.* *J. Am. Chem. Soc.* **1978**, *100*, 5620. (Cont'd)

End Game

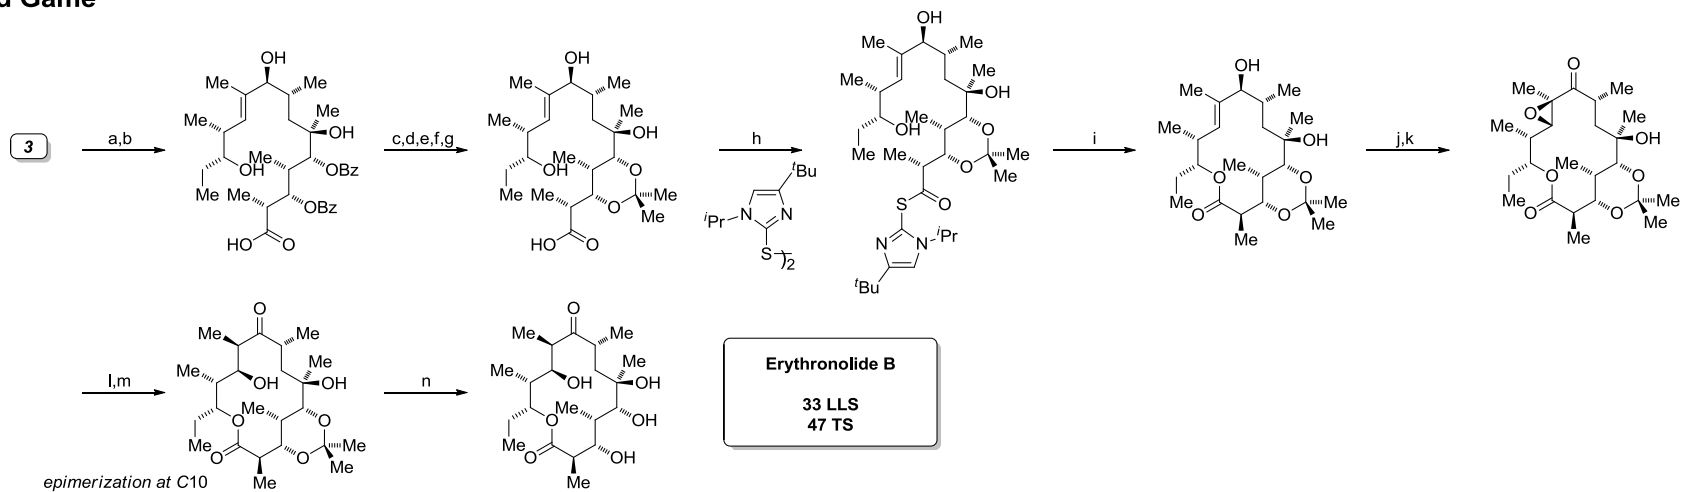

Key: (a) AcOH; (b) LiOH, H<sub>2</sub>O<sub>2</sub>; (c) KOH; (d) CH<sub>2</sub>N<sub>2</sub>; (e) HBr; (f) Me<sub>2</sub>C(OMe)<sub>2</sub>, Amberlite-50; (g) KOH; (h) PPh<sub>3</sub>; (i) Heating; (j) MnO<sub>2</sub>; (k) H<sub>2</sub>O<sub>2</sub>, NaOH; (l) H<sub>2</sub>, Pd/C; (m) K<sub>2</sub>CO<sub>3</sub>; (n) HCl



G. Kochetkov *et al.* *Tetrahedron Lett.* **1987**, *28*, 3835.

**Fragment 1**

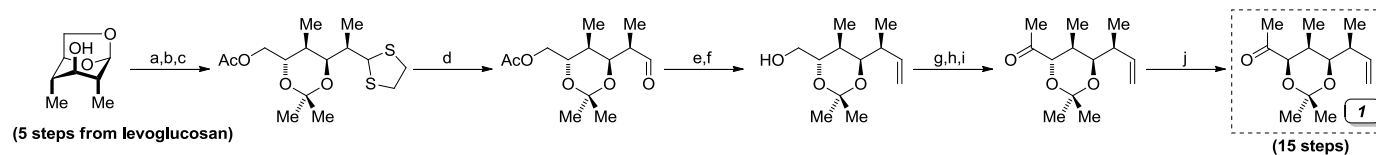

Key: (a) HS(CH<sub>2</sub>)<sub>2</sub>SH, BF<sub>3</sub>OEt<sub>2</sub>; (b) Ac<sub>2</sub>O-Py; (c) DMP-Me<sub>2</sub>CO, TsOH; (d) HgCl<sub>2</sub>, CaCO<sub>3</sub>; (e) Ph<sub>3</sub>P=CH<sub>2</sub>; (f) MeONa, MeOH; (g) (COCl)<sub>2</sub>, DMSO, TEA; (h) MeMgCl; (i) (COCl)<sub>2</sub>, DMSO, TEA; (j) K<sub>2</sub>CO<sub>3</sub>, MeOH

**Fragment 2**

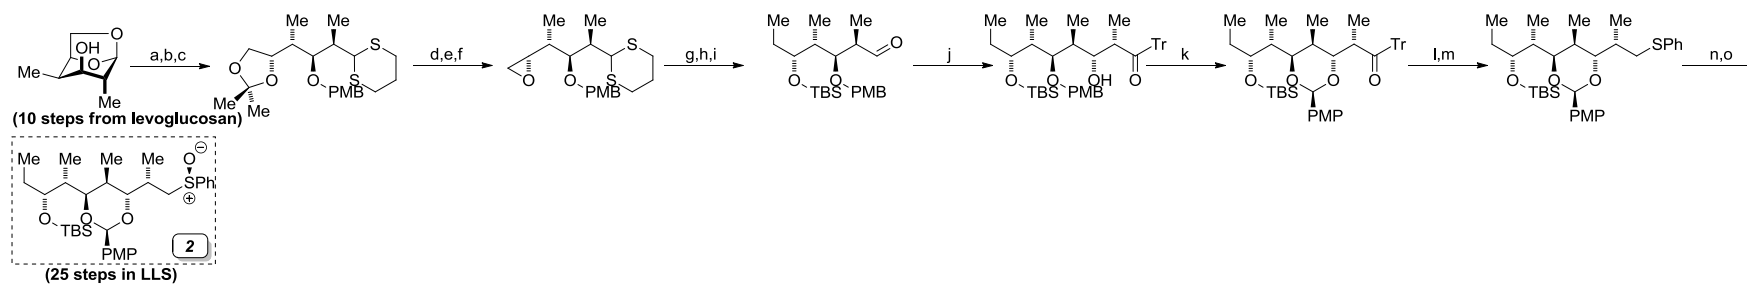

Key: (a) HS(CH<sub>2</sub>)<sub>2</sub>SH, BF<sub>3</sub>OEt<sub>2</sub>; (b) DMP-Me<sub>2</sub>CO, TsOH; (c) NaH, PMBCl; (d) AcOH, H<sub>2</sub>O; (e) TsCl, Py; (f) K<sub>2</sub>CO<sub>3</sub>, MeOH; (g) MeMgCl, CuCl-Me<sub>2</sub>S, THF; (h) *t*-BuPh<sub>2</sub>SiClO<sub>4</sub>, TEA; (i) HgCl<sub>2</sub>-CdCO<sub>3</sub>; (j) C<sub>2</sub>H<sub>5</sub>COTr, BuLi; (k) DDQ, 3A MS, DCM; (l) LiBHET<sub>3</sub>; (m) Ph<sub>2</sub>S<sub>2</sub>, PBu<sub>3</sub>, Py; (n) MCPBA, FAA; (o) collidine

**Fragment Union and End Game**

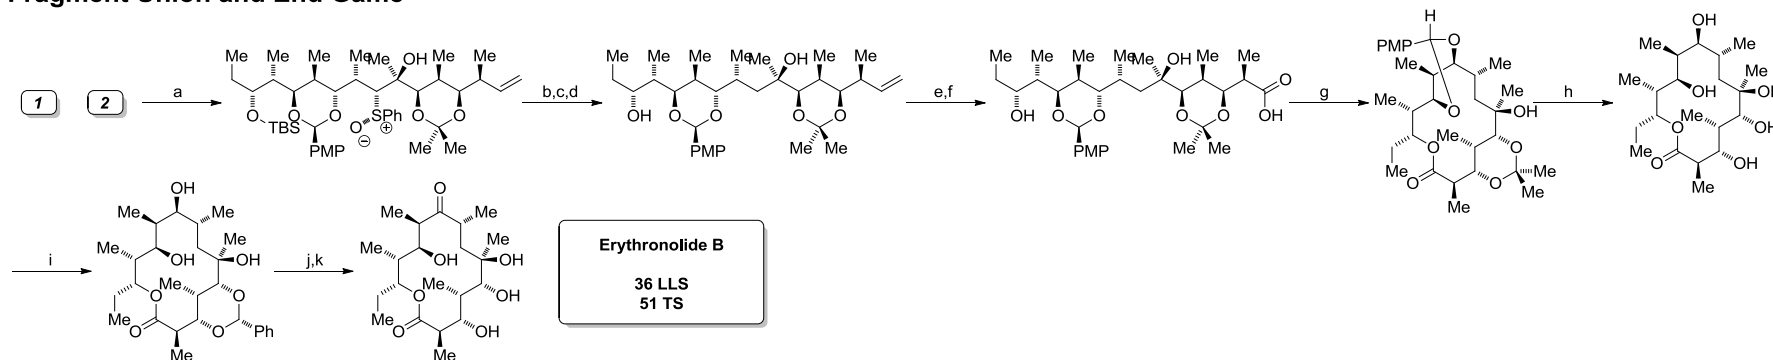

Key: (a) LDA, THF; (b) TFAA, NaI, Me<sub>2</sub>CO; (c) Na, NH<sub>3</sub>; (d) TBAF, THF; (e) O<sub>3</sub>; (f) mCPBA, pH = 7 buffer; (g) 2,2'-dithiobis(4-*t*-bu-*l*-*i*-pr-imidazole), PPh<sub>3</sub>, PhCH<sub>3</sub>; (h) TFA; (i) PhCH(OEt)<sub>2</sub>, CSA; (j) PCC, 3A MS; (k) AcOH, H<sub>2</sub>O

H. Mulzer *et al.* *J. Am. Chem. Soc.* **1991**, *113*, 910.

### Chiral Auxiliary and Precursor 1,2

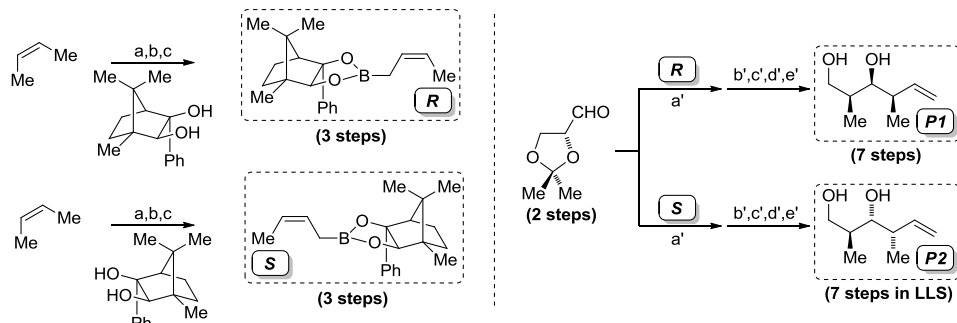

Key: (a) BuLi, *t*BuOK; (b) Cl-B(NMe<sub>2</sub>)<sub>2</sub>; (c) distillation  
(a') -78 °C; (b') TsCl; (c') PPTS; (d') NaHCO<sub>3</sub>; (e') Me<sub>2</sub>CuLi

### Fragment 1 and 2

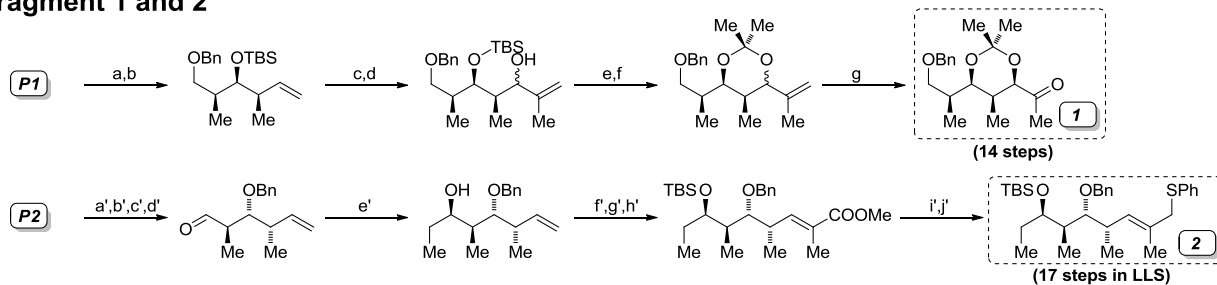

Key: (a) NaH, BnBr; (b) TBSCl, Imid.; (c) O<sub>3</sub>, PPh<sub>3</sub>; (d) H<sub>2</sub>C=C(Me)-MgBr; (e) TBAF; (f) DMP, H<sup>+</sup>; (g) O<sub>3</sub>, PPh<sub>3</sub>  
(a') TrCl, DMAP, Py; (b') NaH, BnBr; (c') HCOOH, then KOH; (d') (COCl)<sub>2</sub>, DMSO, TEA; (e') EtMgBr; (f') TBSCl, TEA; (g') O<sub>3</sub>, PPh<sub>3</sub>; (h') Ph<sub>3</sub>P-C(Me)COOMe; (i') DIBAL-H; (j') Bu<sub>3</sub>P, (PhS)<sub>2</sub>, Py

### Fragment Union and End Game

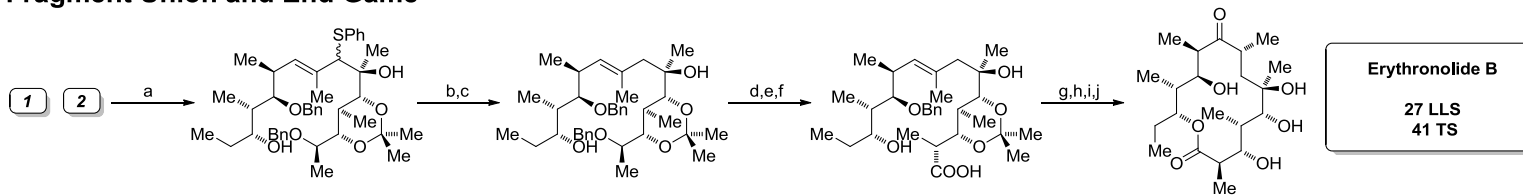

Key: (a) BuLi, TMEDA, then BF<sub>3</sub>; (b) Li/EtNH<sub>2</sub>; (c) Ac<sub>2</sub>O, DMAP, Py; (d) *t*BuOK; (e) PDC, DMF; (f) NaOH; (g) 2,4,6-trichlorobenzoyl chloride, TEA, then DMAP; (h) BH<sub>3</sub>•SMe<sub>2</sub>, then H<sub>2</sub>O<sub>2</sub>; (i) PCC; (j) 80% HOAc

I. Nelson *et al.* *Angew. Chem. Int. Ed.* **2010**, *49*, 2591.

### Catalyst and Homologation Reagent

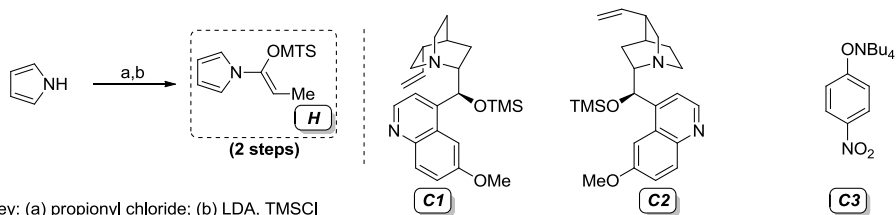

### Fragment 1

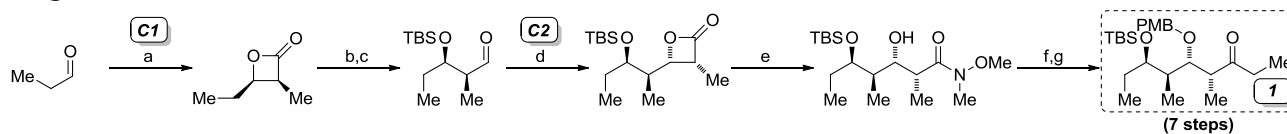

### Fragment 2

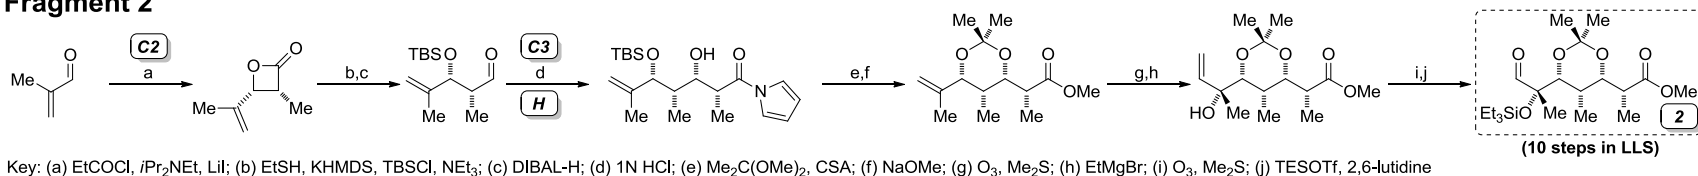

### Fragment Coupling and End Game

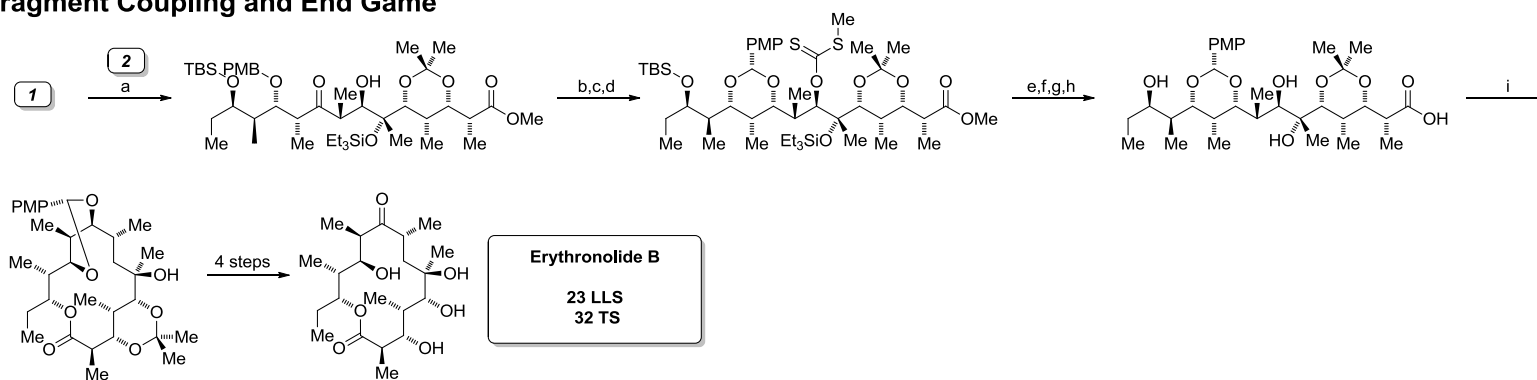

J. Stork *et al.* *J. Am. Chem. Soc.* **1987**, *109*, 1565.

### Fragment 1

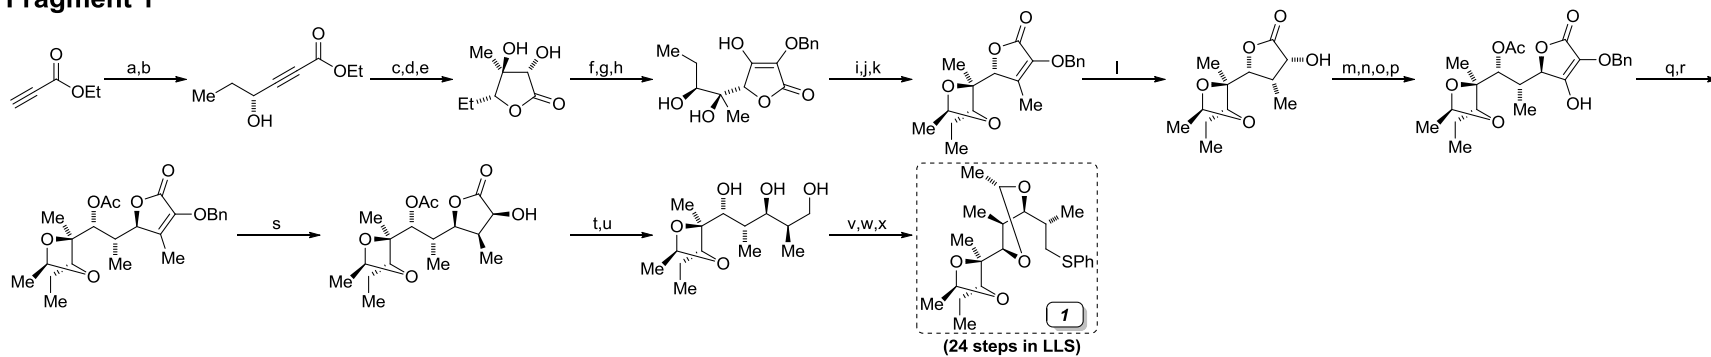

Key: (a) BuLi, propionyl chloride; (b) 9-BBN, (*R*)-pinene; (c) H<sub>2</sub>C=C(Me)OMe, CSA; (d) dimethylthiocuprate, then acid; (e) OsO<sub>4</sub>, NMO; (f) TMSCl, Imid.; (g) LHMDS, EtOC(O)CH<sub>2</sub>OBn; (h) K<sub>2</sub>CO<sub>3</sub>; (i) MeCH(COMe)<sub>2</sub>, CSA; (j) (PhO)<sub>2</sub>P(O)Cl, Na<sub>2</sub>CO<sub>3</sub>, TBABr; (k) Me<sub>2</sub>Zn, Ni(acac)<sub>2</sub>; (l) H<sub>2</sub>, Pd/C; (m) TMSNMe<sub>2</sub>; (n) LHMDS, EtOC(O)CH<sub>2</sub>OBn; (o) K<sub>2</sub>CO<sub>3</sub>; (p) Ac<sub>2</sub>O, TEA, DMAP; (q) (PhO)<sub>2</sub>P(O)Cl, Na<sub>2</sub>CO<sub>3</sub>, TBABr; (r) Me<sub>2</sub>Zn, Ni(acac)<sub>2</sub>; (s) Rh/Alumina, H<sub>2</sub>; (t) LAH, HOAc, HIO<sub>4</sub>; (u) NaBH<sub>4</sub>; (v) CH<sub>3</sub>C(OEt)<sub>3</sub>, PPTS; (w) BH<sub>3</sub>-THF; (x) (PhS)<sub>2</sub>, PPh<sub>3</sub>

### Fragment 2

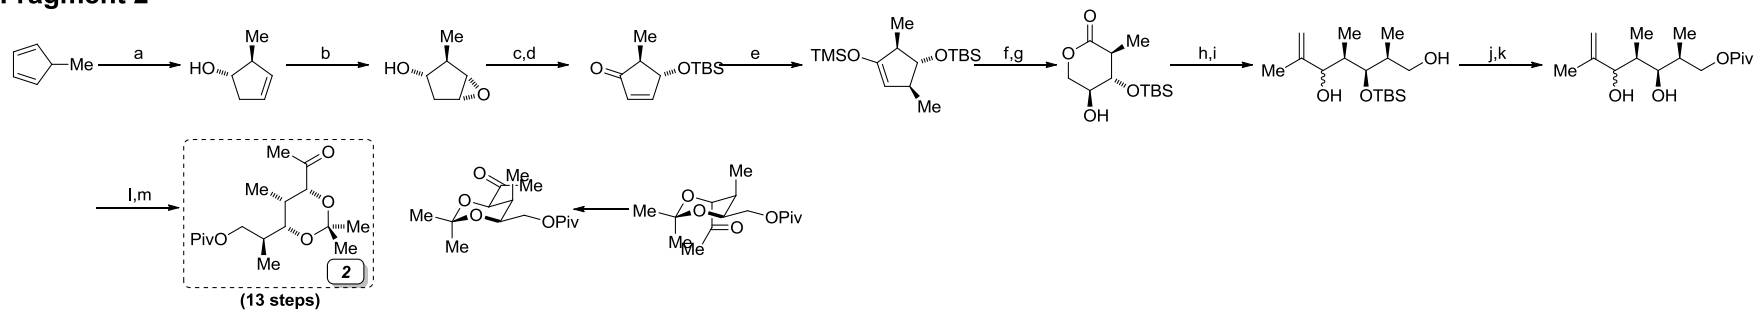

Key: (a) (*R*)-pinene, BH<sub>3</sub>-THF, then H<sub>2</sub>O<sub>2</sub>; (b) VO(acac)<sub>2</sub>; (c) CrO<sub>3</sub>, H<sub>2</sub>SO<sub>4</sub>; (d) NEt<sub>3</sub>, then TBSCl, DMAP; (e) LiCuMe<sub>2</sub>, then TMSCl; (f) O<sub>3</sub>, NaBH<sub>4</sub>; (g) 2N HCl; (h) DIBAL-H; (i) 2-propenyl lithium; (j) TBAF; (k) PivCl, DMAP, TEA; (l) Me<sub>2</sub>C(OMe)<sub>2</sub>, PPTS; (m) O<sub>3</sub>, PPh<sub>3</sub>

### Fragment Union

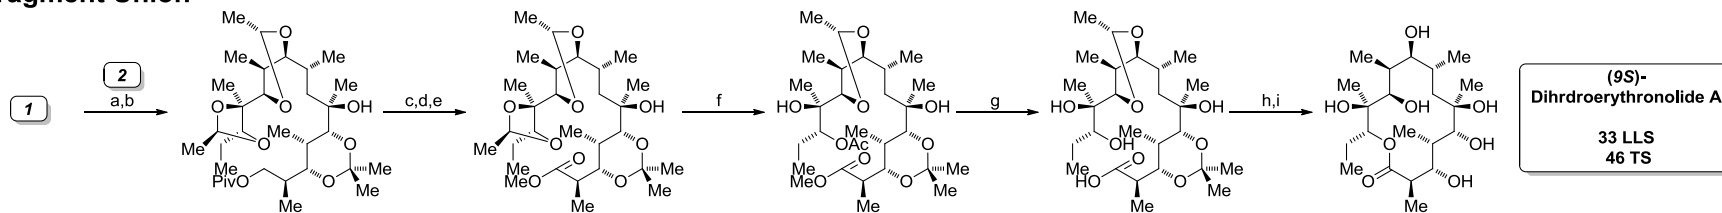

Key: (a) 4,4'-dibutylbiphenyl, Li; (b) MgBr<sub>2</sub>; (c) MeLi; (d) PDC; (e) Me<sub>2</sub>SO<sub>4</sub>; (f) O<sub>3</sub>; (g) KOH, aq. MeOH; (h) DCC, DMAP, refluxing chloroform; (i) HCl

K. Yonemitsu *et al. Tetrahedron Lett.* **1987**, *28*, 4569.

### Fragment 1

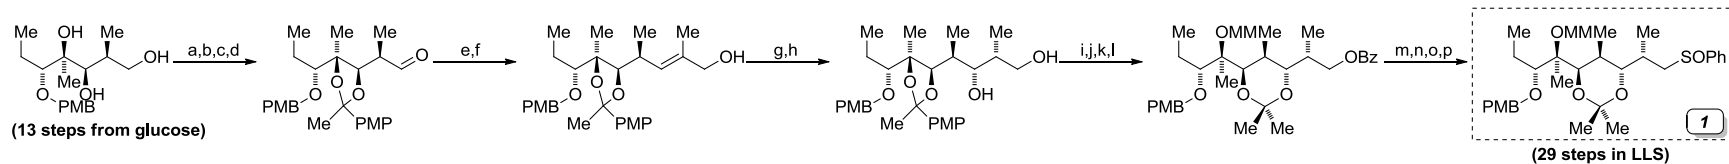

Key: (a) BzCl, Py; (b) PMPCMe(OMe)<sub>2</sub>, CSA; (c) 1N KOH, MeOH; (d) (COCl)<sub>2</sub>, DMSO, TEA; (e) Ph<sub>3</sub>P=CMeCO<sub>2</sub>Et, EDC; (f) LAH; (g) mCPBA; (h) NaBH<sub>3</sub>CN, BF<sub>3</sub>OEt<sub>2</sub>; (i) BzCl, Py; (j) 4N HCl; (k) CH<sub>2</sub>=C(Me)OMe, PPTS; (l) MMCl, *i*-Pr<sub>2</sub>NEt; (m) 1N NaOH; (n) TsCl, TEA, DMAP; (o) PhSnA, EtOH; (p) NaIO<sub>4</sub>

### Fragment 2

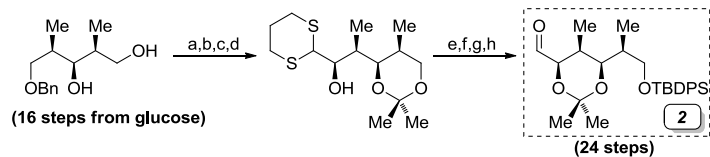

Key: (a) Me<sub>2</sub>C(OMe)<sub>2</sub>, CSA; (b) 10% Pd-C, H<sub>2</sub>; (c) PCC, 4A MS; (d) HS(CH<sub>2</sub>)<sub>3</sub>SH, BuLi; (e) TsOH; (f) TBDPSCI, imid.; (g) CH<sub>2</sub>=C(Me)OMe, PPTS; (h) MeI, NaHCO<sub>3</sub>

### Fragment Union and Macrocyclization

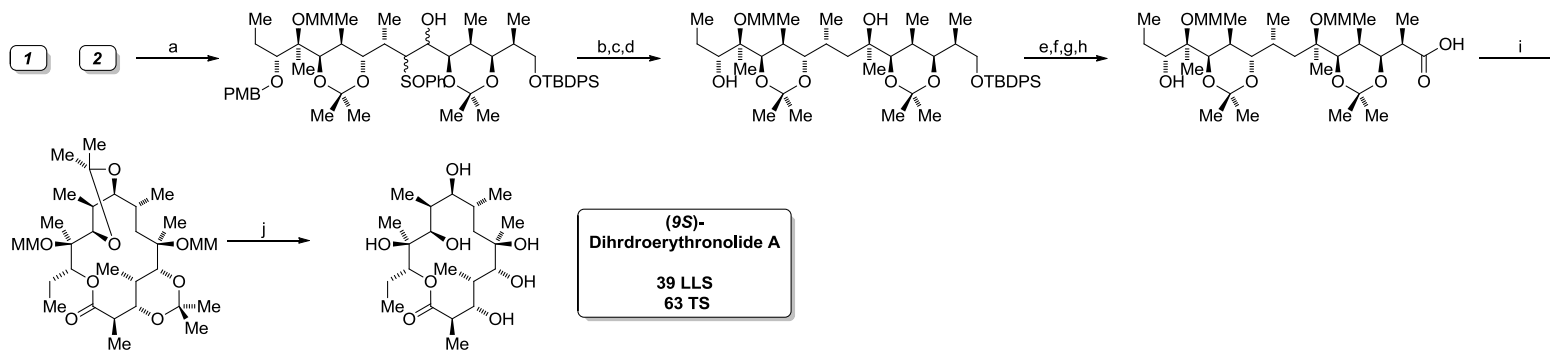

Key: (a) LDA; (b) Raney Ni; (c) (COCl)<sub>2</sub>, DMSO, TEA; (d) MeLi; (e) MMCl, *i*-Pr<sub>2</sub>NEt; (f) TBAF; (g) Jones reagent; (h) 10% Pd/C, H<sub>2</sub>; (i) 2,4,6-Cl<sub>3</sub>C<sub>6</sub>H<sub>2</sub>COCl, TEA, then DMAP; (j) 50% HOAc

L. Paterson *et al.* *Tetrahedron Lett.* **1989**, *30*, 7463.

### Precursor 1 and 2

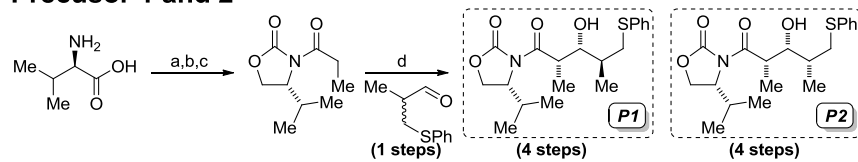

Key: (a) NaBH<sub>4</sub>, I<sub>2</sub>; (b) K<sub>2</sub>CO<sub>3</sub>, diethyl carbonate; (c) BuLi, then propionyl chloride; (d) Bu<sub>2</sub>BOTf, *i*Pr<sub>2</sub>NEt

### Fragment 1 and 2

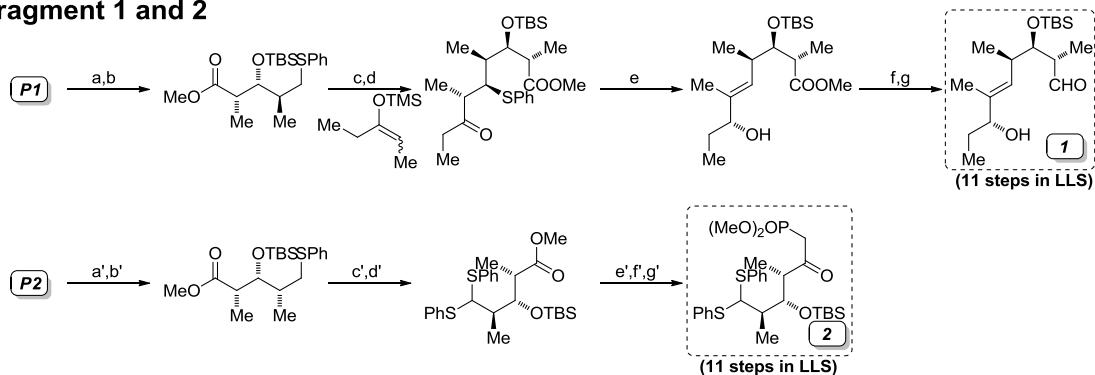

Key: (a) NaOMe; (b) TBSOTf, 2,6-lutidine; (c) NCS; (d) ZnBr<sub>2</sub>; (e) NaIO<sub>4</sub>; (f) (+)-*N*-methylephedrine, *N*-ethylaniline, LAH; (g) DIBAL-H  
(a') NaOMe; (b') TBSOTf, 2,6-lutidine; (c') NCS; (d') PhSiMe<sub>3</sub>, ZnBr<sub>2</sub>; (e') BuLi; (f') (+)-*N*-methylephedrine, *N*-ethylaniline, LAH; (g') DIBAL-H

### Fragment Union and Macrocyclization

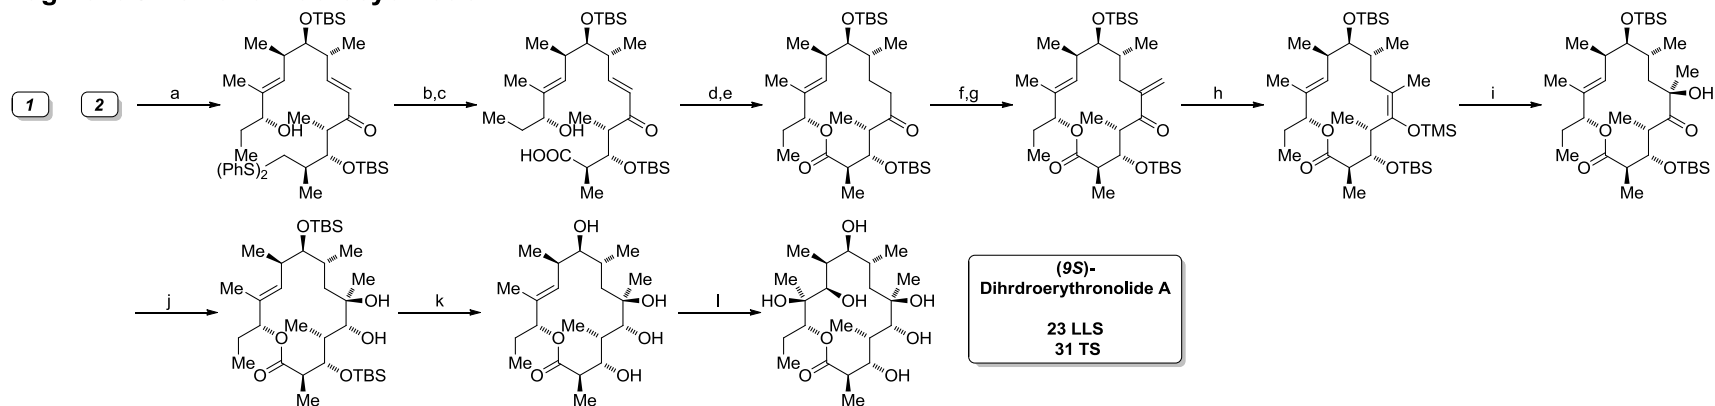

Key: (a) *i*Pr<sub>2</sub>NEt, LiCl; (b) HgO, *aq.* HBF<sub>4</sub>; (c) NaClO<sub>2</sub>, 2-methyl-2-butene, NaH<sub>2</sub>PO<sub>4</sub>; (d) 2,4,6-trichlorobenzoyl chloride, TEA, then DMAP; (e) H<sub>2</sub>, Rh/Al<sub>2</sub>O<sub>3</sub>; (f) LDA, CH<sub>2</sub>O; (g) MsCl, TEA, then DBU; (h) L-selectride, then TMSCl; (i) OsO<sub>4</sub>, NMO, quinuclidine; (j) Zn(BH<sub>4</sub>)<sub>2</sub>; (k) 40% *aq.* HF; (l) OsO<sub>4</sub>, NMO, then Na<sub>2</sub>S<sub>2</sub>O<sub>5</sub>



N. Woerpel *et al.* *J. Am. Chem. Soc.* **2003**, *125*, 6018.

### Allylsilane and Auxillary Synthesis

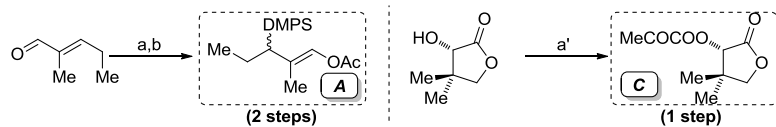

Key: (a) Li, then CuI, DMPSCI; (b) BuLi, Ac<sub>2</sub>O  
(a') MeCOCOCI, NEt<sub>3</sub>, DMAP

### Common Precursor 1

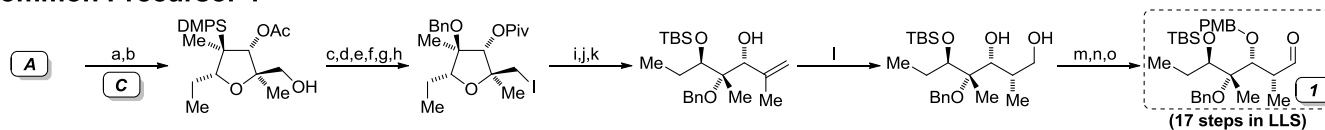

Key: (a) TiCl<sub>4</sub>; (b) LAH; (c) NaH, PMBCl; (d) PhMe<sub>2</sub>CCOOH; (e) NaH, BnBr; (f) CAN; (g) I<sub>2</sub>, PPh<sub>3</sub>; (h) Piv<sub>2</sub>O, Sc(OTf)<sub>3</sub>; (i) Zn, HOAc; (j) TBSOTf; (k) DIBAL-H; (l) HMDS, Pt(0), H<sub>2</sub>O<sub>2</sub>; (m) MeOC<sub>6</sub>H<sub>4</sub>CH(OMe)<sub>2</sub>, PPTS; (n) DIBAL-H; (o) (COCl)<sub>2</sub>, DMSO, TEA

### Fragment Union

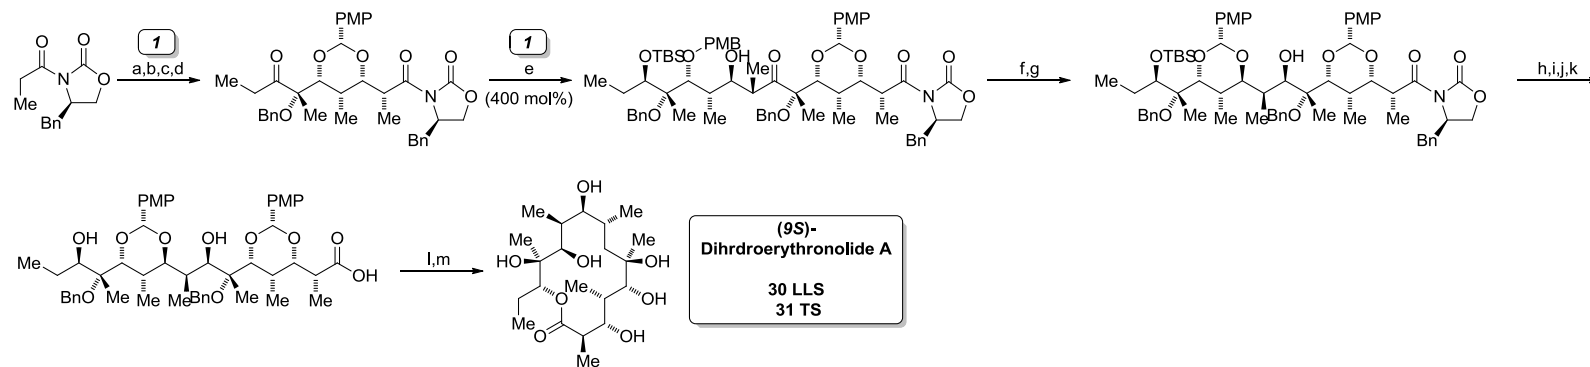

Key: (a) TiCl<sub>4</sub>, (-)-sparteine; (b) DDQ; (c) HF-Py, Py; (d) (COCl)<sub>2</sub>, DMSO, TEA; (e) Sn(OTf)<sub>2</sub>, TEA; (f) Zn(BH<sub>4</sub>)<sub>2</sub>; (g) DDQ; (h) NaH, CS<sub>2</sub>, MeI; (i) AIBN, Bu<sub>3</sub>SnH; (j) LiOOH; (k) TBAF; (l) 2,4,6-trichlorobenzoyl chloride, TEA, then DMAP; (m) H<sub>2</sub>, Pd(OH)<sub>2</sub>/C



O. Masamune *et al.* *J. Am. Chem. Soc.* **1981**, *103*, 1568.

### Auxiliary Preparation

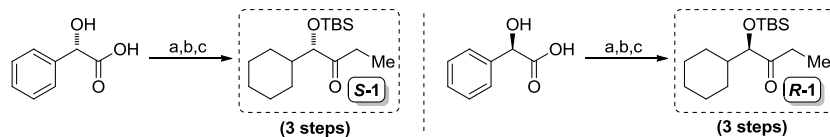

Key: (a) Rh/Al<sub>2</sub>O<sub>3</sub>; (b) EtLi, -78 °C; (c) TBSOTf, 2,6-lutidine

### Fragment 1

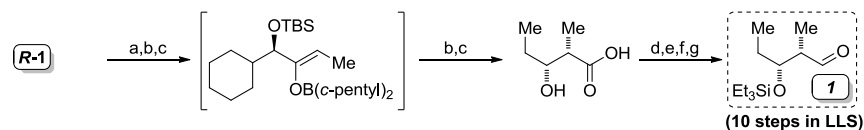

Key: (a) c-pentylBOTf, *i*Pr<sub>2</sub>NEt, then acetyl aldehyde; (b) HF-MeCN; (c) NaIO<sub>4</sub>; (d) CH<sub>2</sub>N<sub>2</sub>; (e) TESCI, DMAP; (f) DIBAL-H; (g) CrO<sub>3</sub>•2Py

### Fragment 2

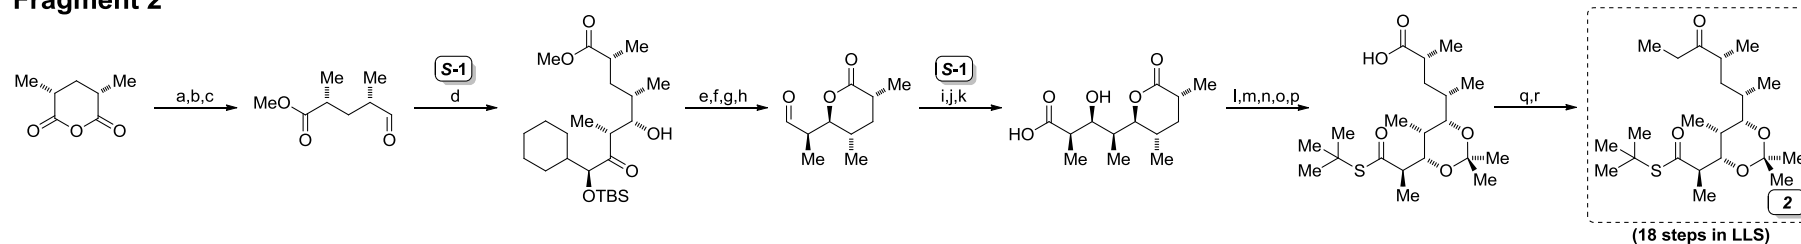

Key: (a) lipase, MeOH; (b) (COCl)<sub>2</sub>; (c) Pd-BaSO<sub>4</sub>, H<sub>2</sub>; (d) S-1, c-pentylBOTf, *i*Pr<sub>2</sub>NEt; (e) HF-MeCN; (f) NaIO<sub>4</sub>; (g) (COCl)<sub>2</sub>; (h) Pd-BaSO<sub>4</sub>, H<sub>2</sub>; (i) S-1, c-pentylBOTf, *i*Pr<sub>2</sub>NEt; (j) TBAF; (k) NaIO<sub>4</sub>; (l) ClCO<sub>2</sub>Et, Py; (m) TIS*t*Bu, HS*t*Bu; (n) KOH, H<sub>2</sub>O; (o) TBDPSCI, DMF; (p) MeC(OMe)=CH<sub>2</sub>, TFA; (q) (COCl)<sub>2</sub>, Py; (r) LiCuEt<sub>2</sub>

### End Game

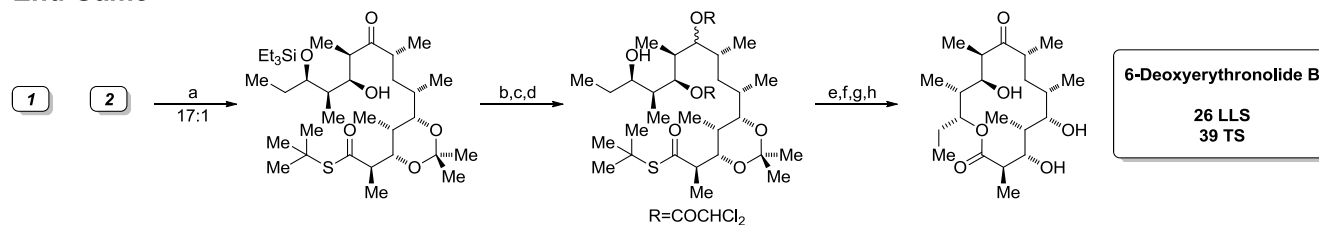

Key: (a) LHMDS; (b) NaBH<sub>4</sub>, MeOH; (c) (CHCl<sub>2</sub>CO)<sub>2</sub>O, Py; (d) HOAc; (e) CuOTf, *i*Pr<sub>2</sub>NEt; (f) KOH, H<sub>2</sub>O/THF/MeOH; (g) PCC; (h) TFA, MeCN/H<sub>2</sub>O



Q. Evans *et al.* *Tetrahedron Lett.* **1997**, *38*, 53; *J. Am. Chem. Soc.* **1998**, *120*, 5921.

### Chiral Auxiliary Synthesis

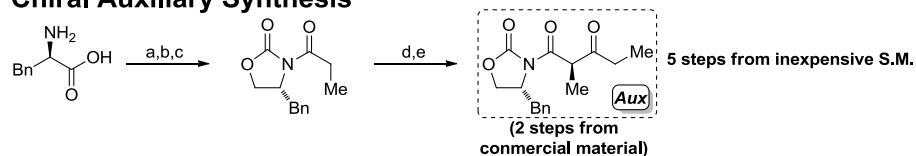

Key: (a) NaBH<sub>4</sub>, I<sub>2</sub>; (b) K<sub>2</sub>CO<sub>3</sub>, diethyl carbonate; (c) BuLi, then propionyl chloride; (d) Cy<sub>2</sub>BOTf, *i*Pr<sub>2</sub>NEt, then propionaldehyde; (e) SO<sub>3</sub>•Py, TEA, DMSO

### Fragment 1

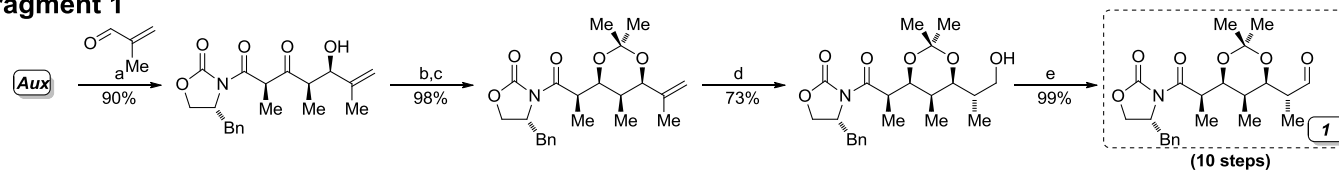

Key: (a) TiCl<sub>4</sub>, *i*Pr<sub>2</sub>NEt, then methacrolein; (b) Zn(BH<sub>4</sub>)<sub>2</sub>; (c) Me<sub>2</sub>C(OMe)<sub>2</sub>, CSA; (d) 9-BBN; (e) (COCl)<sub>2</sub>, TEA, DMSO

### Fragment 2

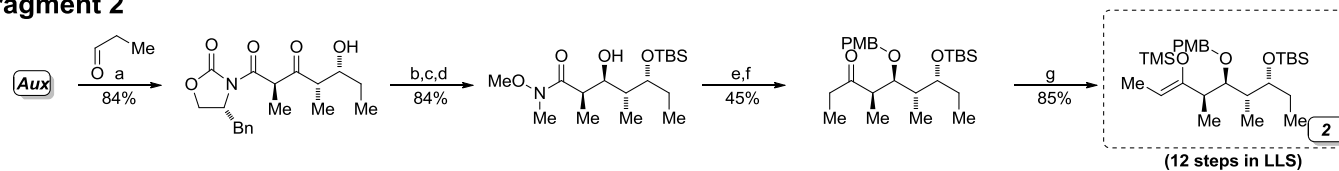

Key: (a) Sn(OTf)<sub>2</sub>, TEA, then propionaldehyde; (b) NaBH(OAc)<sub>3</sub>, AcOH; (c) TBSOTf, 2,6-lutidine; (d) AlMe<sub>3</sub>, (MeO)MeNH•HCl; (e) EtMgBr; (f) Cl<sub>3</sub>CC(NH)O-(*p*-OMe)Bn, TfOH; (g) BuLi, (PhMe<sub>2</sub>Si)<sub>2</sub>NH, TMSOTf, 2,6-lutidine

### End Game

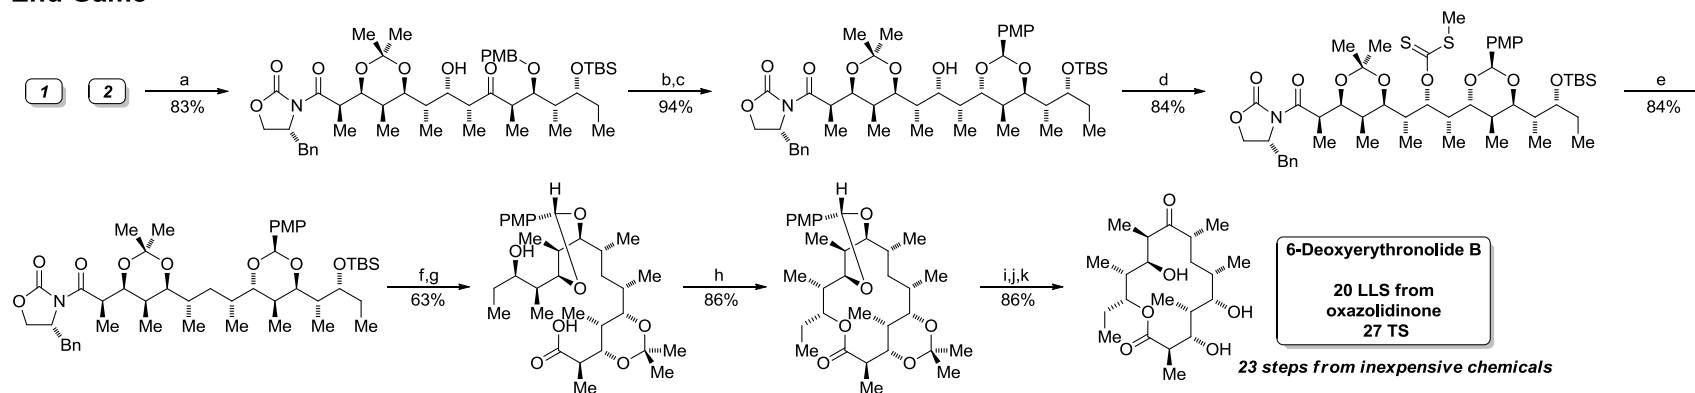

Key: (a) BF<sub>3</sub>•OEt<sub>2</sub>; (b) Zn(BH<sub>4</sub>)<sub>2</sub>; (c) DDQ; (d) NaH, then CS<sub>2</sub>, then MeI; (e) AIBN, Bu<sub>3</sub>SnH; (f) LiOOH; (g) TBAF; (h) TEA, 2,4,6-trichlorobenzoyl chloride, then DMAP (i) Pd(OH)<sub>2</sub>/C, *i*PrOH; (j) PCC; (k) 1M HCl

R. Crimmins *et al.* *Org. Lett.* **2006**, *8*, 2191.

### Chiral Auxiliary Synthesis

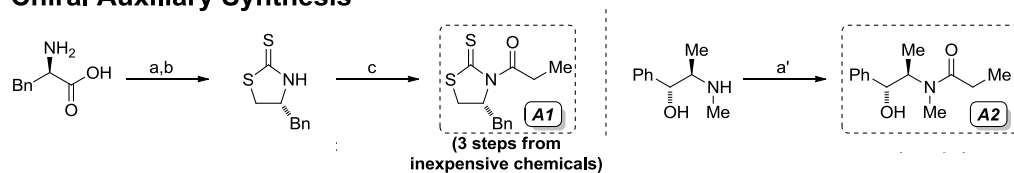

Key: (a) NaBH<sub>4</sub>, I<sub>2</sub>; (b) KOH, CS<sub>2</sub>, H<sub>2</sub>O, reflux; (c) propionyl chloride, DMAP, TEA

### Iterative Aldol Addition

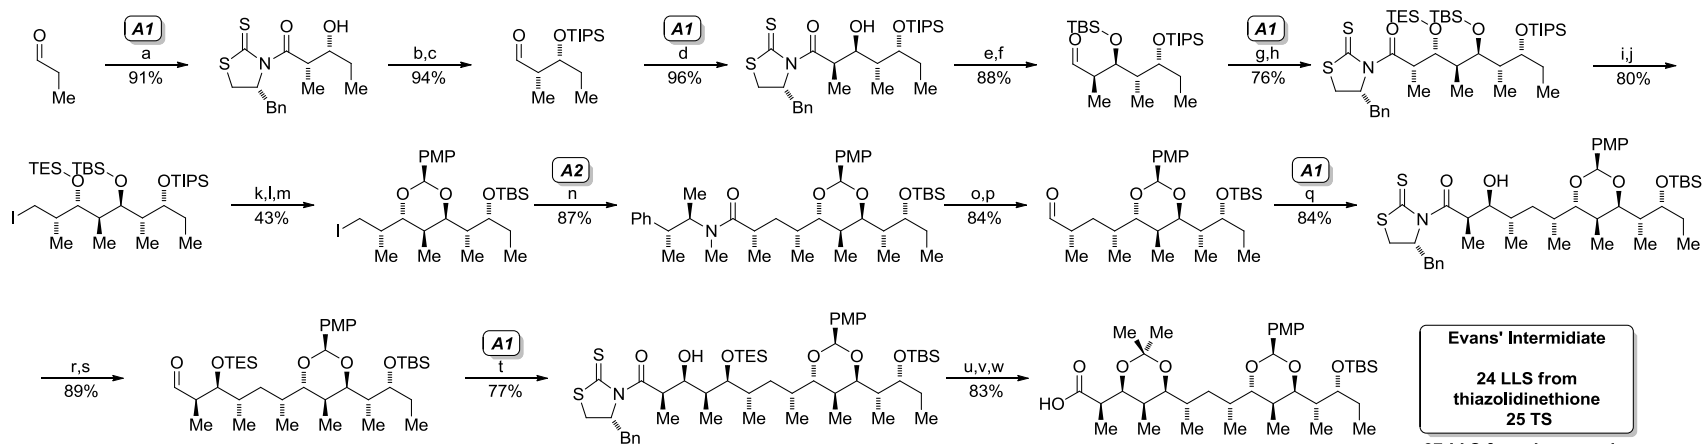

Key: (a) TiCl<sub>4</sub>, *i*Pr<sub>2</sub>NEt, then propionaldehyde; (b) TIPSOTf, 2,6-lutidine; (c) DIBAL; (d) TiCl<sub>4</sub>, (-)-sparteine, NMP; (e) TBSOTf, 2,6-lutidine; (f) DIBAL-H; (g) TiCl<sub>4</sub>, *i*Pr<sub>2</sub>NEt; (h) TESOTf, 2,6-lutidine; (i) LiBH<sub>4</sub>; (j) PPh<sub>3</sub>, I<sub>2</sub>; (k) TsOH, MeOH; (l) *p*-MeOPhCHO, CSA; (m) TBSOTf, 2,6-lutidine; (n) LDA, LiCl; (o) LDA, BH<sub>3</sub>•NH<sub>3</sub>; (p) Dess-Martin periodate; (q) TiCl<sub>4</sub>, (-)-sparteine, NMP; (r) TESOTf, 2,6-lutidine; (s) DIBAL-H; (t) TiCl<sub>4</sub>, (-)-sparteine, NMP; (u) HF-Py; (v) (MeO)<sub>2</sub>CMe<sub>2</sub>, CSA; (w) LiOH

S. White *et al.* *Nature Chem.* **2009**, *1*, 547.

### Chiral Auxiliary Synthesis

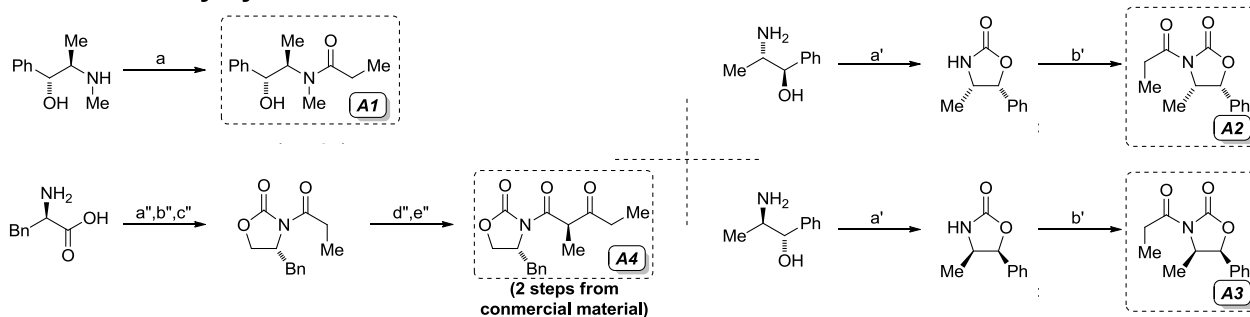

Key: (a) propionyl chloride, DMAP, TEA; (a') K<sub>2</sub>CO<sub>3</sub>, diethyl carbonate; (b') BuLi, then propionyl chloride; (a'') NaBH<sub>4</sub>, I<sub>2</sub>; (b'') K<sub>2</sub>CO<sub>3</sub>, diethyl carbonate; (c'') BuLi, then propionyl chloride; (d'') Cy<sub>2</sub>BOTf, *i*Pr<sub>2</sub>NEt, then propionaldehyde; (e'') SO<sub>3</sub>-Py, TEA, DMSO

### C-H Macrolactonization Precursor

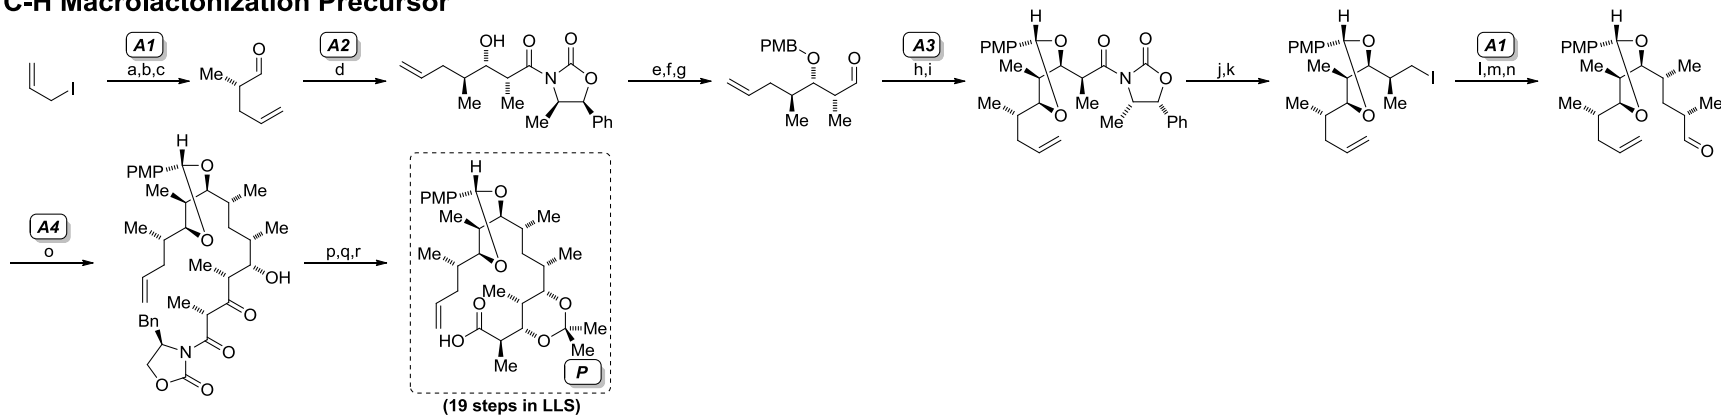

Key: (a) LDA, LiCl; (b) LDA, BH<sub>3</sub>•NH<sub>3</sub>; (c) (COCl)<sub>2</sub>, DMSO, TEA; (d) Bu<sub>2</sub>BOTf, *i*Pr<sub>2</sub>NEt; (e) AlMe<sub>3</sub>, (MeO)NHMe•HCl; (f) PMBBr, NaH; (g) DIBAL-H; (h) Bu<sub>2</sub>BOTf, TEA; (i) DDQ; (j) LAH; (k) PPh<sub>3</sub>, I<sub>2</sub>, imidazole; (l) LDA, LiCl; (m) TBSOTf, 2,6-lutidine; (n) LDA, LiCl; (o) Ti(O*i*Pr)<sub>3</sub>, TEA; (p) Zn(BH<sub>4</sub>)<sub>2</sub>; (q) (MeO)<sub>2</sub>CMe<sub>2</sub>, CSA; (r) LiOH

### End Game: C-H Macrolactonization

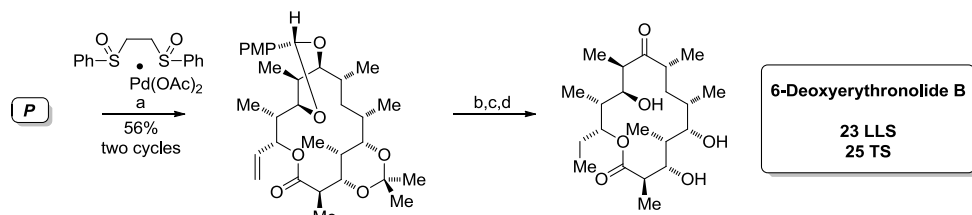

Key: (a) Cat., benzoquinone; (b) Pd(OH)<sub>2</sub>/C, H<sub>2</sub>; (c) TPAP, NMO; (d) 1M HCl

## Graphical Summary of Previous Syntheses of Cyanolide A and Clavosolide A

A. Hong *et al.* *Org. Lett.* **2010**, *12*, 2880.

### Starting Material Synthesis

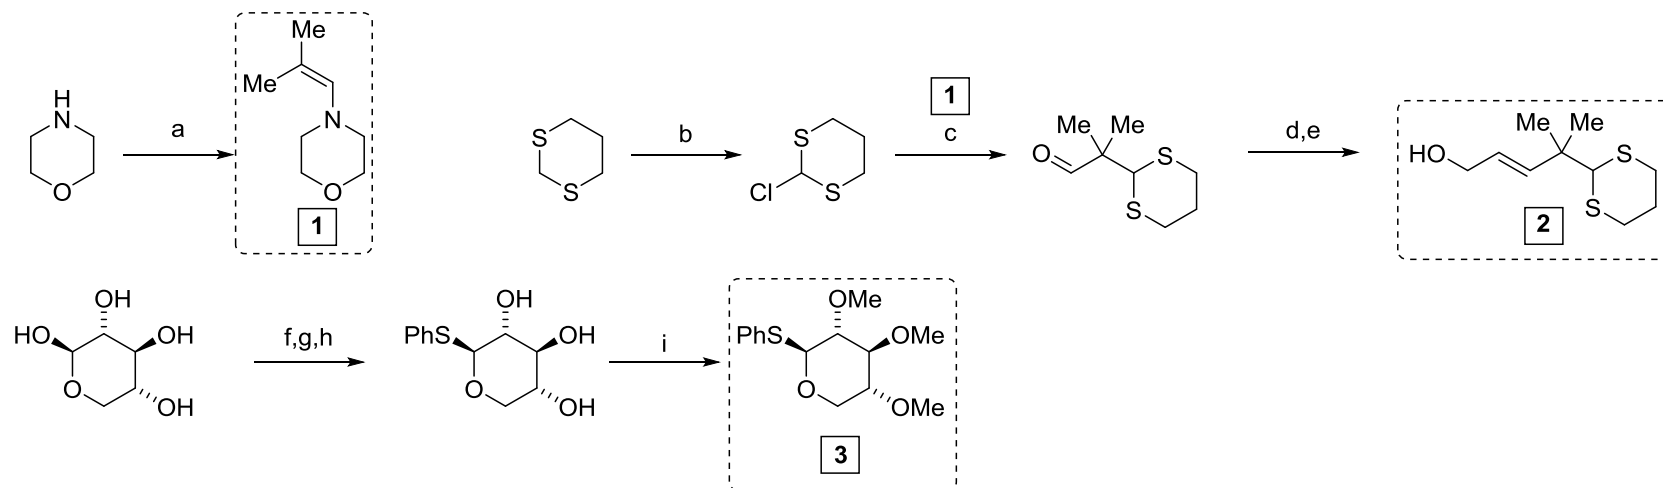

Key: (a) isobutyraldehyde, removal of H<sub>2</sub>O; (b) N-chlorosuccinamide, benzene; (c) **1**, THF:Et<sub>2</sub>O (1:1); (d) trimethyl phosphonoacetate, KO<sup>t</sup>Bu, THF 0 °C; (e) DIBAL, toluene, -78 °C; (f) Ac<sub>2</sub>O, pyridine, 0 °C to rt; (g) thiophenol, BF<sub>3</sub>·OEt<sub>2</sub>, CH<sub>2</sub>Cl<sub>2</sub>, 0 °C; (h) NaOMe, MeOH, 25 °C, then Amberlite IR-120(H<sup>+</sup>) resin; (i) NaH, MeI, DMF, rt.

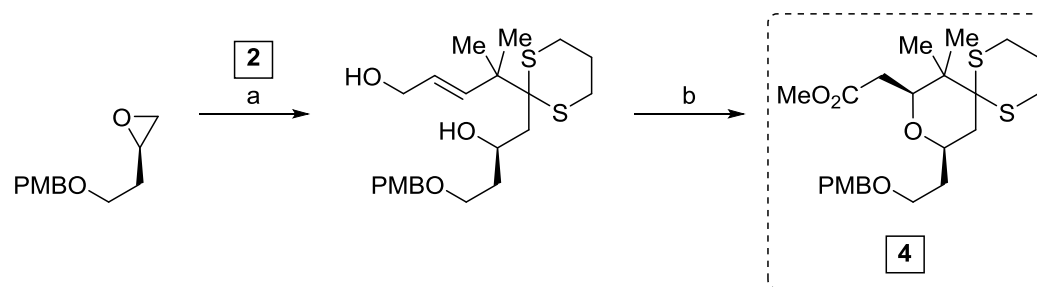

Reagents: (a) **2**, <sup>t</sup>BuLi, HMPA/THF, -78 °C; (b) MnO<sub>2</sub>, CH<sub>2</sub>Cl<sub>2</sub>, dimethyl triazolium iodide, DBU, MeOH, MnO<sub>2</sub>, 4Å MS, 25 °C.

A. Hong *et al.* *Org. Lett.* **2010**, *12*, 2880. (Cont'd)

**Dimerization-Glycosylation Route:**

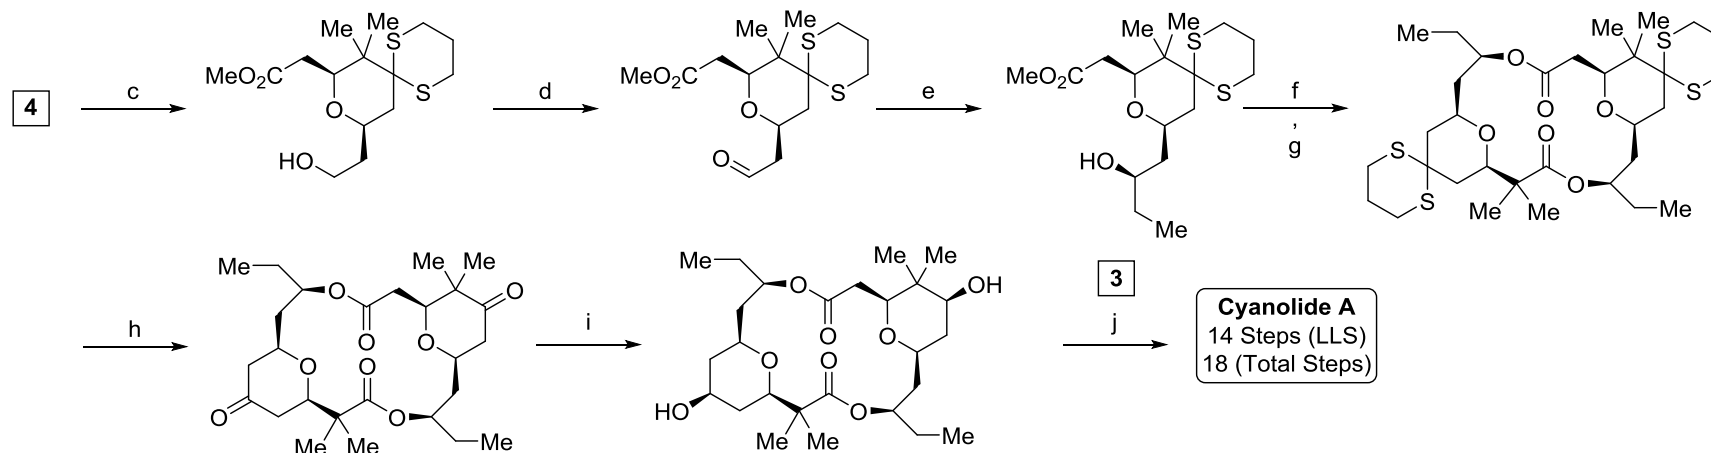

Key: (a) DDQ, H<sub>2</sub>O:CH<sub>2</sub>Cl<sub>2</sub> (1:10), 25 °C; (b) SO<sub>3</sub>·pyr, Et<sub>3</sub>N:DMSO:CH<sub>2</sub>Cl<sub>2</sub> (1:1:10), 0 °C to 25 °C; (c) Et<sub>2</sub>Zn, (+)-MIB, toluene:hexanes (1:2), 0 °C; (d) LiOH, THF:MeOH:H<sub>2</sub>O (2:1:1), 25 °C; (g) MNBA, DMAP, toluene, 90 °C; (e) I<sub>2</sub>, sat. aq. NaHCO<sub>3</sub>:CH<sub>3</sub>CN (1:1), 0 °C; (f) NaBH<sub>4</sub>, MeOH, -40 to -20 °C; (g) **3**, MeOTf, Et<sub>2</sub>O, 4 Å MS, 25 °C.

**Glycosylation-Dimerization Route:**

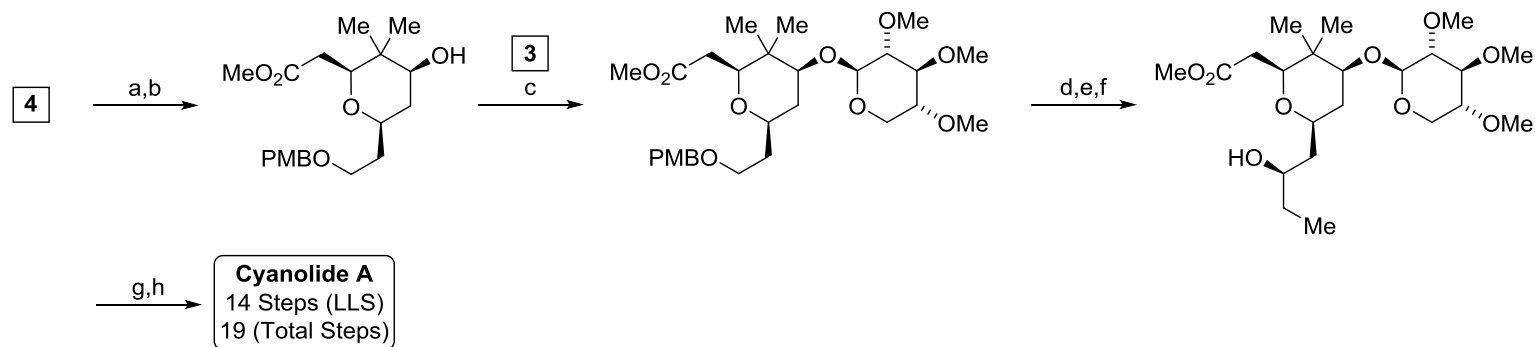

Key: (a) I<sub>2</sub>, sat. aq. NaHCO<sub>3</sub>:CH<sub>3</sub>CN (1:1), 0 °C; (b) NaBH<sub>4</sub>, MeOH, -40 to -20 °C; (c) **3**, MeOTf, Et<sub>2</sub>O, 4 Å MS, 25 °C; (d) DDQ, H<sub>2</sub>O:CH<sub>2</sub>Cl<sub>2</sub> (1:10), 25 °C; (e) TPAP, NMO, 4 Å MS, CH<sub>2</sub>Cl<sub>2</sub>, 25 °C; (f) Et<sub>2</sub>Zn, (+)-MIB, toluene:hexanes (1:2), 0 °C; (g) LiOH, THF:MeOH:H<sub>2</sub>O (2:1:1), 25 °C; (h) MNBA, DMAP, toluene, 90 °C.

B. Pabbaraja *et al.* *J. Org. Chem.* **2011**, *76*, 1922.

### Linear Synthesis

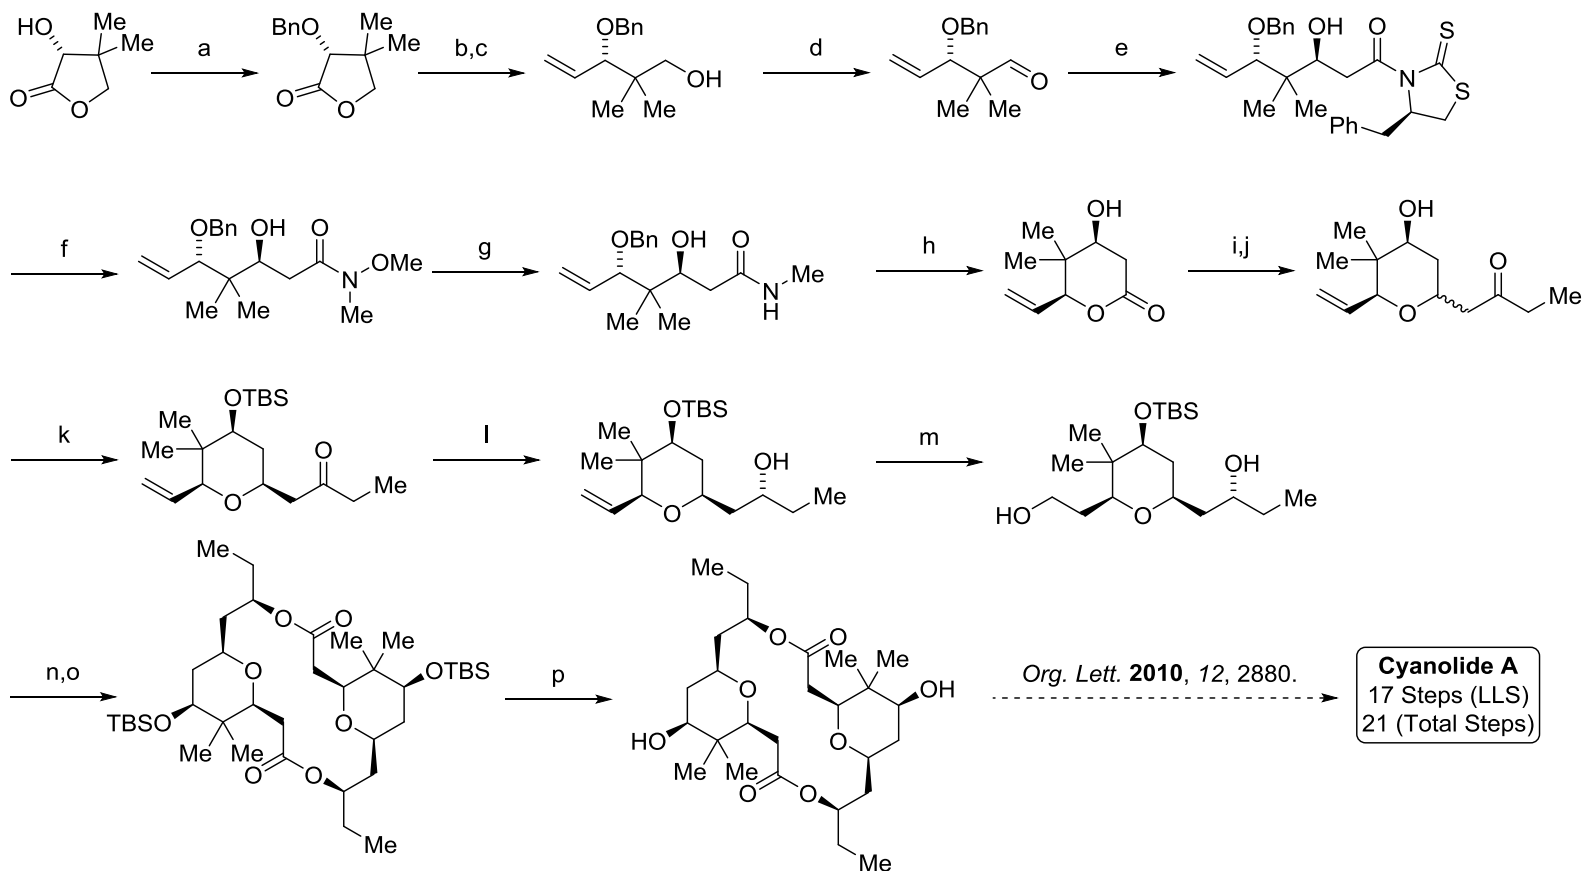



C. She *et al.* *Org. Biomol. Chem.* **2011**, *9*, 984.

### Linear Synthesis

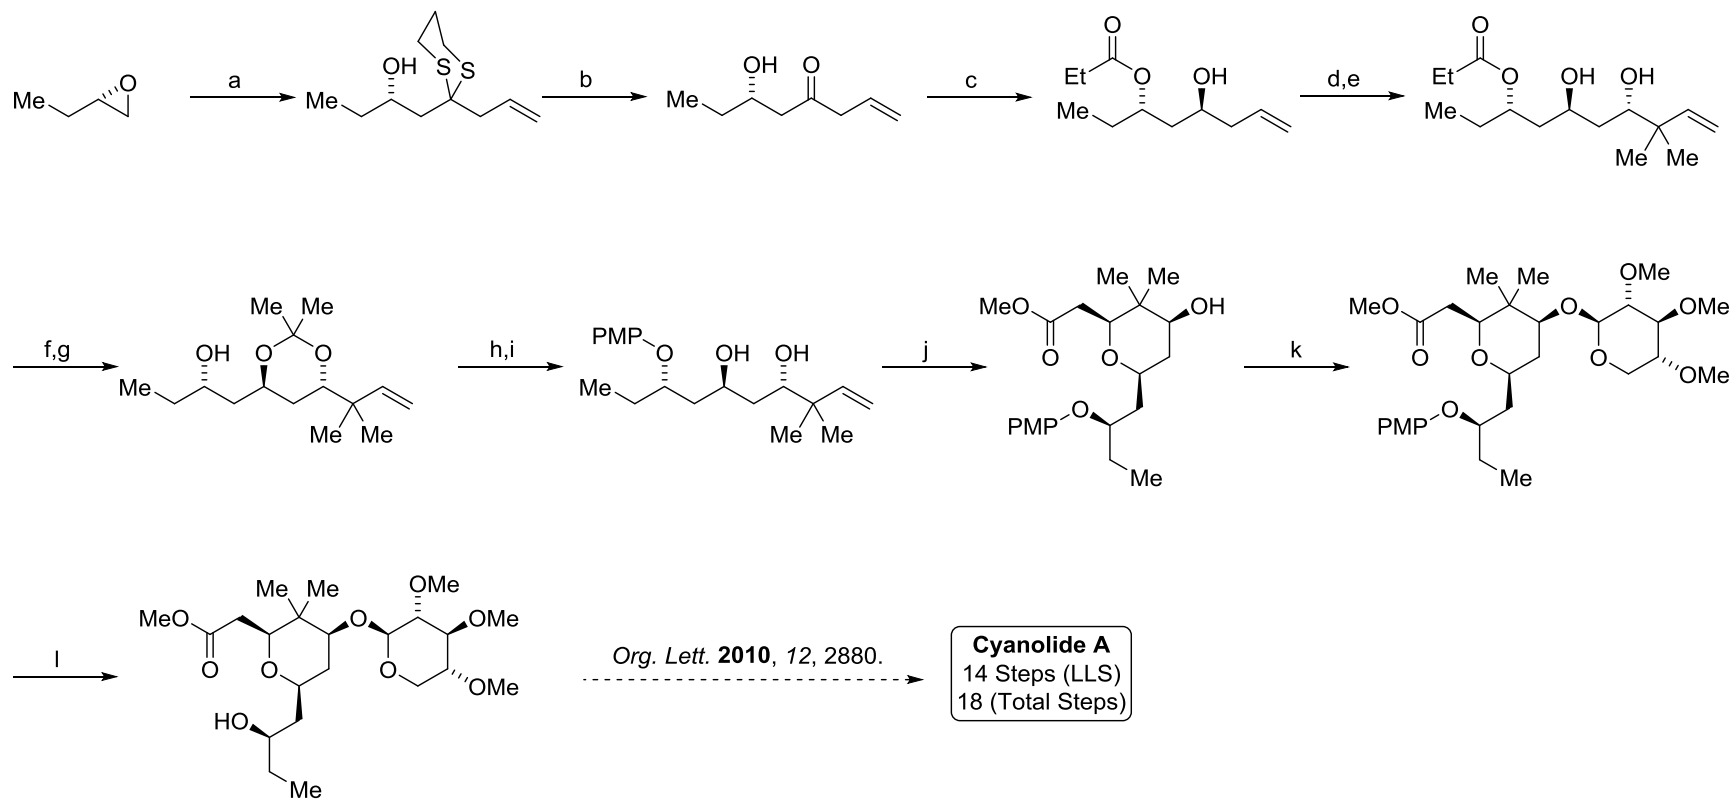

Reagents: (a) 2-allyl-1,3-dithiane, <sup>n</sup>BuLi, THF, 0 °C; (b) I<sub>2</sub>, CaCO<sub>3</sub>, THF:H<sub>2</sub>O (4:1), 0 °C; (c) Sml<sub>2</sub>, EtCHO, THF, -10 °C; (d) O<sub>3</sub>, CH<sub>2</sub>Cl<sub>2</sub>, -78 °C; (e) Zn, prenol bromide, aq. NH<sub>4</sub>Cl:THF (4:1), 0 °C; (f) 2,2-dimethoxypropane, TsOH (cat.), CH<sub>2</sub>Cl<sub>2</sub>, 0 °C; (g) LiAlH<sub>4</sub>, THF, 0 °C; (h) 4-methoxyphenol, DIAD, PPh<sub>3</sub>, THF, 25 °C; (i) 1 N HCl, MeOH, 0 °C; (j) PdCl<sub>2</sub> (cat.), CuCl<sub>2</sub>, CH<sub>3</sub>CN, MeOH, CO, 30 °C; (k) (3*R*,4*S*,5*R*)-3,4,5-trimethoxy-2-(phenylthio)tetrahydro-2*H*-pyran, MeOTf, 4Å MS, 25 °C; (l) CAN, CH<sub>3</sub>CN:H<sub>2</sub>O (4:1), 0 °C

D. Reddy *et al. J. Org. Chem.* **2011**, *76*, 936.

Fragment 1

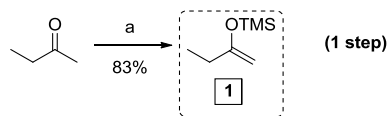

Key: (a) LDA, TMSCl, THF, -78 to 0 °C

Longest Linear Sequence

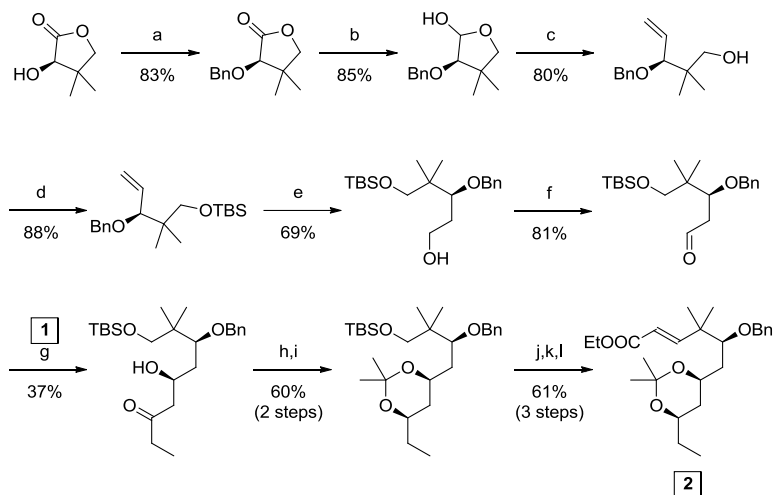

Reagents: (a) AgO, BnBr, DMF, 0 °C; (b) DIBAL, CH<sub>2</sub>Cl<sub>2</sub>, -78 °C; (c) methyl triphenylphosphonium bromide, THF, <sup>t</sup>BuLi in hexanes, 0 °C; (d) TBDMSCl, DMAP, pyridine, 0 °C; (e) BH<sub>3</sub>·THF, THF, -20 °C to rt, then NaOH, H<sub>2</sub>O<sub>2</sub>; (f) (COCl)<sub>2</sub>, CH<sub>2</sub>Cl<sub>2</sub>, DMSO, Et<sub>3</sub>N, -78 °C; (g) **1**, BF<sub>3</sub>·Et<sub>2</sub>O, CH<sub>2</sub>Cl<sub>2</sub>, -78 °C; (h) catecholborane, THF, -10 °C; (i) 2,2-dimethoxypropane, PPTS, CH<sub>2</sub>Cl<sub>2</sub>, 25 °C; (j) TBAF, THF, 60 °C; (k) (COCl)<sub>2</sub>, DMSO, Et<sub>3</sub>N, CH<sub>2</sub>Cl<sub>2</sub>, -78 °C; (l) Ph<sub>3</sub>PCHCOOEt, toluene, reflux

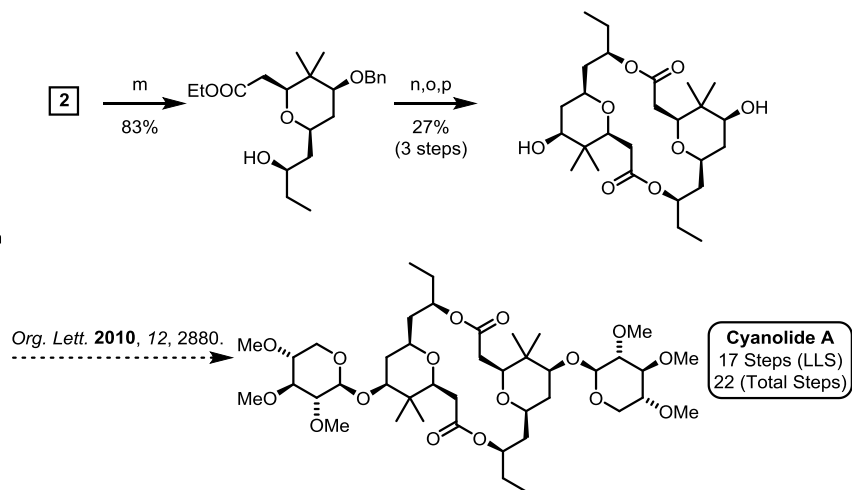

Key: (m) PTSA, CHCl<sub>3</sub>, reflux; (n) LiOH·H<sub>2</sub>O, H<sub>2</sub>O:MeOH:THF (1:1:2), 25 °C; (o) 2,4,6-trichlorobenzoyl chloride, Et<sub>3</sub>N, THF, DMAP, toluene, reflux; (p) Pd(OH)<sub>2</sub>, MeOH, H<sub>2</sub>, rt.

E. Rychnovsky *et al.* *J. Am. Chem. Soc.* **2011**, *133*, 9727.

### Fragment 1

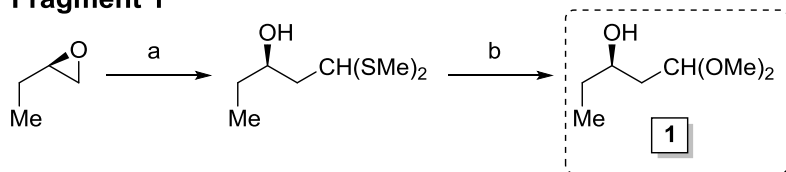

Key: (a)  $(\text{MeS})_2\text{CH}_2$ ,  $^t\text{BuLi}$ , THF; (b)  $\text{I}_2$ , MeOH, reflux.

### Linear Synthesis

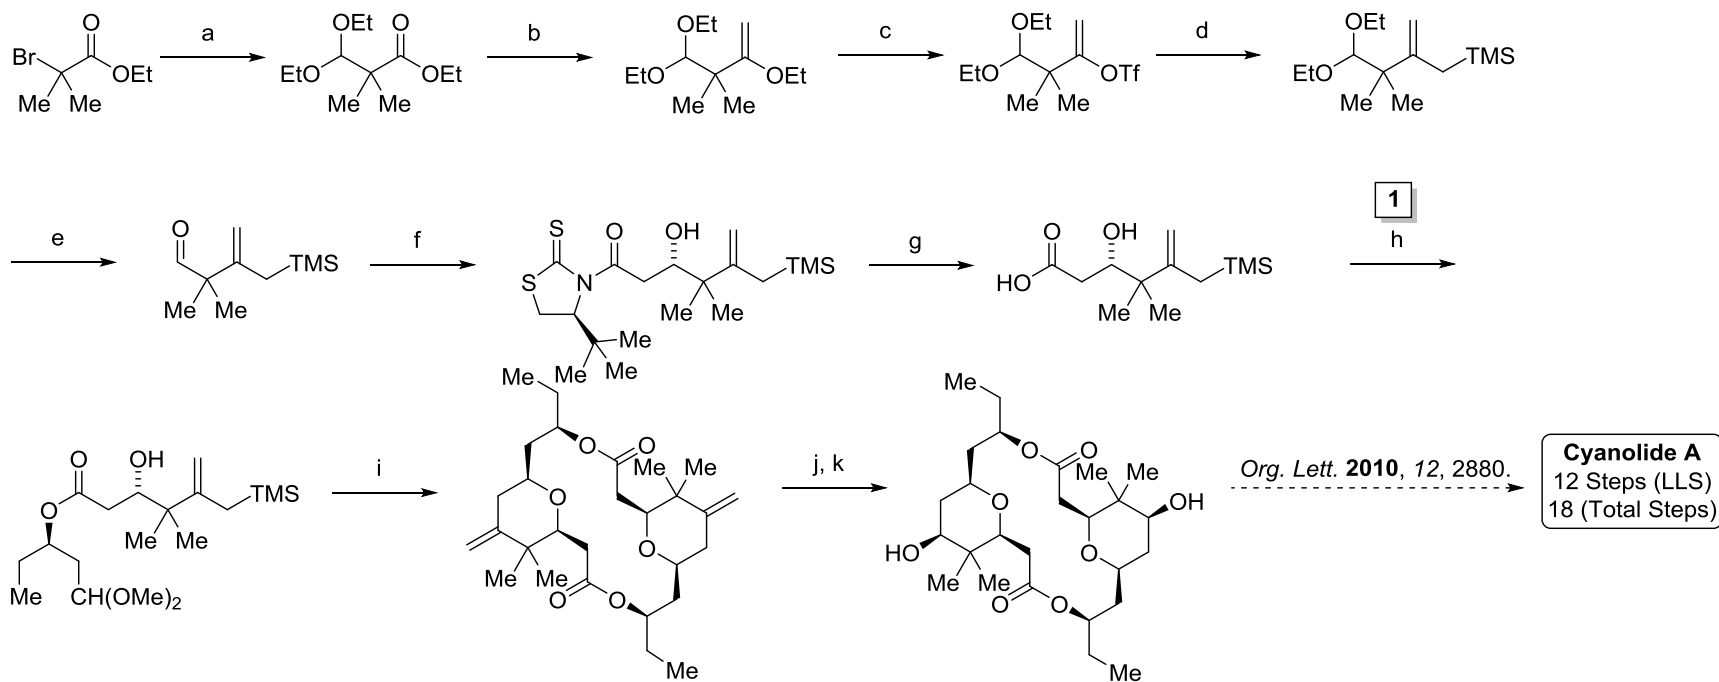

Key: (a) Zn, ethylorthoformate, benzene; (b)  $\text{LiCH}_2\text{TMS}$ , pentane; (c) KHMDS,  $\text{PhNTf}_2$ , THF; (d)  $\text{CIMgCH}_2\text{TMS}$ ,  $\text{Pd}(\text{PPh}_3)_4$ , LiCl,  $\text{Et}_2\text{O}$ ; (e)  $p\text{TSA}\cdot\text{H}_2\text{O}$ ,  $\text{H}_2\text{O}:\text{acetone}$  (1:1); (f) *(S)*-1-(4-(*tert*-butyl)-2-thioxothiazolidin-3-yl)ethanone, (-)-sparteine,  $\text{PhBCl}_2$ ,  $\text{CH}_2\text{Cl}_2$ ; (g)  $\text{LiOH}\cdot\text{H}_2\text{O}$ ,  $\text{H}_2\text{O}:\text{THF}$  (1:2.6); (h) **1**,  $\text{Cl}_3\text{PhCOCl}$ , DMAP,  $\text{Et}_3\text{N}$ , benzene; (i) TMSOTf,  $\text{CH}_2\text{Cl}_2$ ; (j, k)  $\text{OsO}_4$ , NMO,  $\text{H}_2\text{O}:\text{acetone}$  (1:3.15), then  $\text{NaIO}_4$ ; (k)  $\text{NaBH}_4$ , MeOH.

**Linear Synthesis**

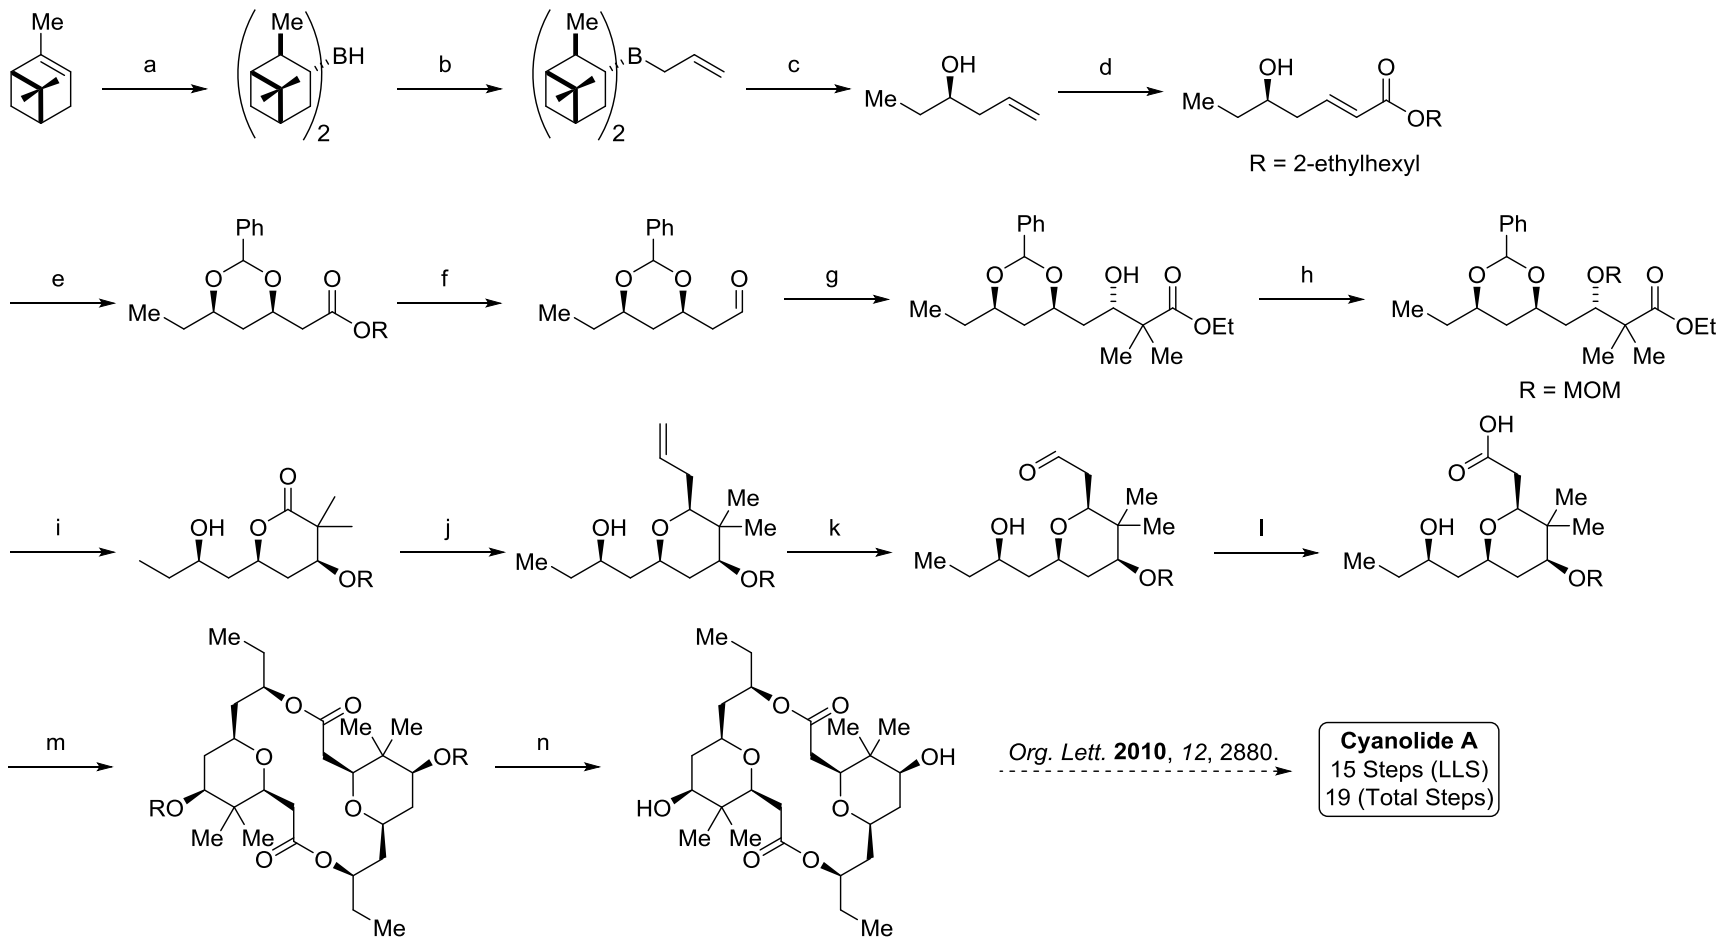

Key: (a)  $\text{BH}_3 \cdot \text{DMS}$ , THF, 0 °C; (b) allylmagnesium bromide,  $\text{Et}_2\text{O}$ , -78 °C; (c) propanal,  $\text{Et}_2\text{O}$ , -78 °C; (d) 2-ethylhexyl acrylate, Grubbs' 2nd Generation, benzene, rt; (e) PhCHO,  $t\text{BuOK}$ , THF, 0 °C; (f) DIBAL,  $\text{CH}_2\text{Cl}_2$ , -78 °C; (g)  $\text{BF}_3 \cdot \text{Et}_2\text{O}$ , ((1-ethoxy-2-methylprop-1-en-1-yl)oxy)trimethylsilane,  $\text{CH}_2\text{Cl}_2$ , -78 °C; (h) MOMCl, DIPEA,  $\text{CH}_2\text{Cl}_2$ ; (i)  $\text{Pd}(\text{OH})_2$ ,  $\text{H}_2$ , MeOH, rt, then TFA, THF,  $\text{H}_2\text{O}$ ; (j) allylmagnesium bromide, THF, -78 °C, then TFA,  $\text{CH}_2\text{Cl}_2$ ; (k)  $\text{O}_3$ , C Reagents: (l)  $\text{NaClO}_2$ ,  $\text{NaH}_2\text{PO}_4$ , 2-methyl-2-butene,  $t\text{BuOH}$ , -10 °C; (m) 2,4,6-trichlorobenzoyl chloride, DMAP, toluene, 125 °C; (n)  $\text{LiBF}_4$ ,  $\text{CH}_3\text{CN}:\text{H}_2\text{O}$ , 60 °C,  $\text{CH}_2\text{Cl}_2$ , -78 °C; (o)  $\text{NaClO}_2$ ,  $\text{NaH}_2\text{PO}_4$ , 2-methyl-2-butene,  $t\text{BuOH}$ , -10 °C; (p) 2,4,6-trichloro-benzoyl chloride, DMAP, toluene, 125 °C; (q)  $\text{LiBF}_4$ ,  $\text{CH}_3\text{CN}:\text{H}_2\text{O}$ , 60 °C.



H. Smith *et al. Org. Lett.* **2006**, *8*, 3315.

### Fragment 1

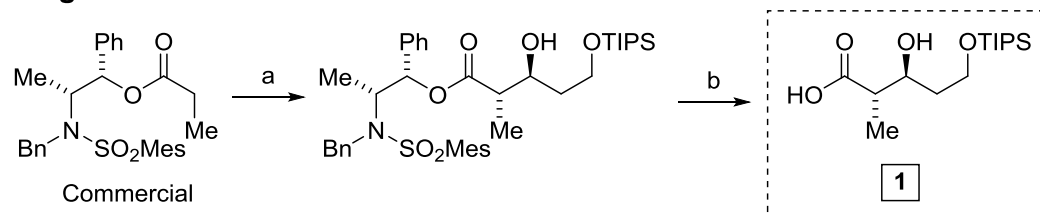

Key: (a) 3-((triisopropylsilyloxy)propanal, *c*-Hex<sub>2</sub>BOTf, Et<sub>3</sub>N, CH<sub>2</sub>Cl<sub>2</sub>; (b) LiOH, THF/H<sub>2</sub>O.

### Fragment 2

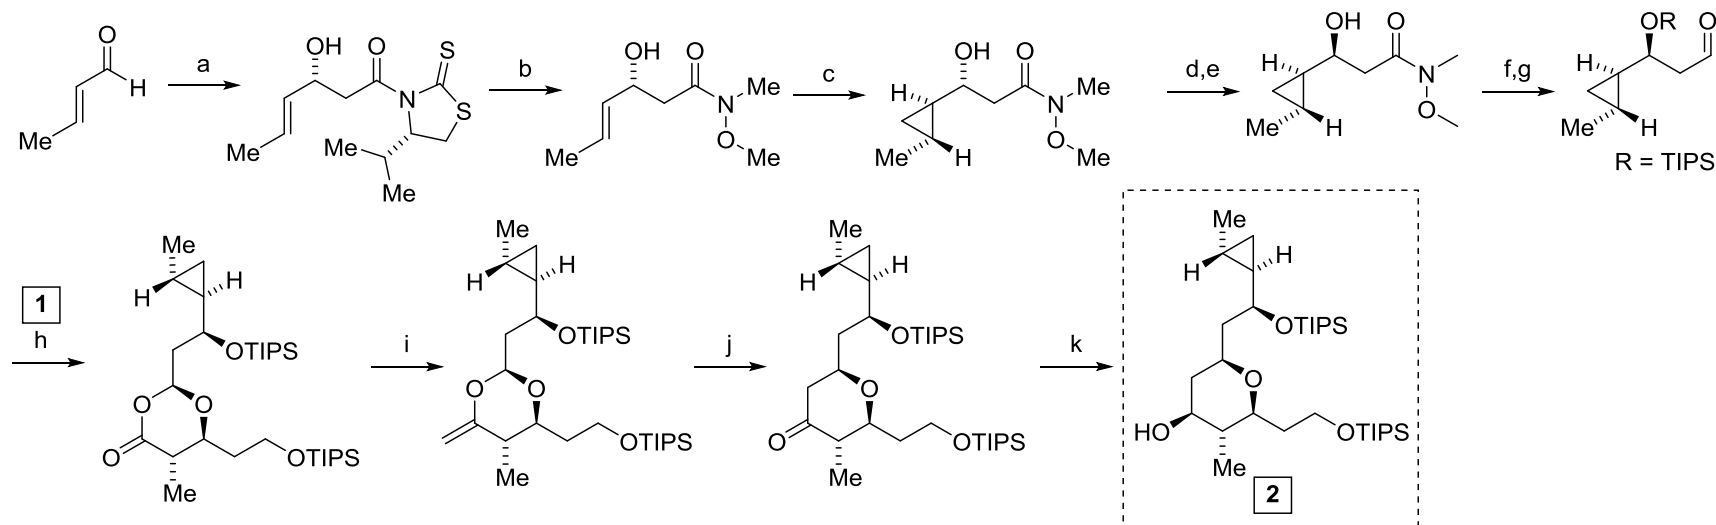

Key: (a) (*S*)-1-(4-isopropyl-2-thioxothiazolidin-3-yl)ethanone, TiCl<sub>4</sub>, DIPEA; (b) MeNH(OMe)-HCl, CH<sub>2</sub>Cl<sub>2</sub>, rt; (c) Et<sub>2</sub>Zn, CH<sub>2</sub>I<sub>2</sub>, CH<sub>2</sub>Cl<sub>2</sub>; (d) AcOH, PPh<sub>3</sub>, DIAD, PhCH<sub>3</sub>; (e) K<sub>2</sub>CO<sub>3</sub>, MeOH; (f) TIPSOTf, 2,6-lutidine, CH<sub>2</sub>Cl<sub>2</sub>; (g) DIBAL, THF; (h) HMDS, **1**, CH<sub>2</sub>Cl<sub>2</sub>, then lactone, TMSOTf, DtBMP, CH<sub>2</sub>Cl<sub>2</sub>; (i) Cp<sub>2</sub>TiMe<sub>2</sub>, Me<sub>3</sub>CCOOEt, THF, dark; (j) Me<sub>2</sub>AlCl, 4 Å MS, CH<sub>2</sub>Cl<sub>2</sub>, rt; (k) NaBH<sub>4</sub>, EtOH.

H. Smith *et al.* *Org. Lett.* **2006**, *8*, 3315. (Cont'd)

### End Game

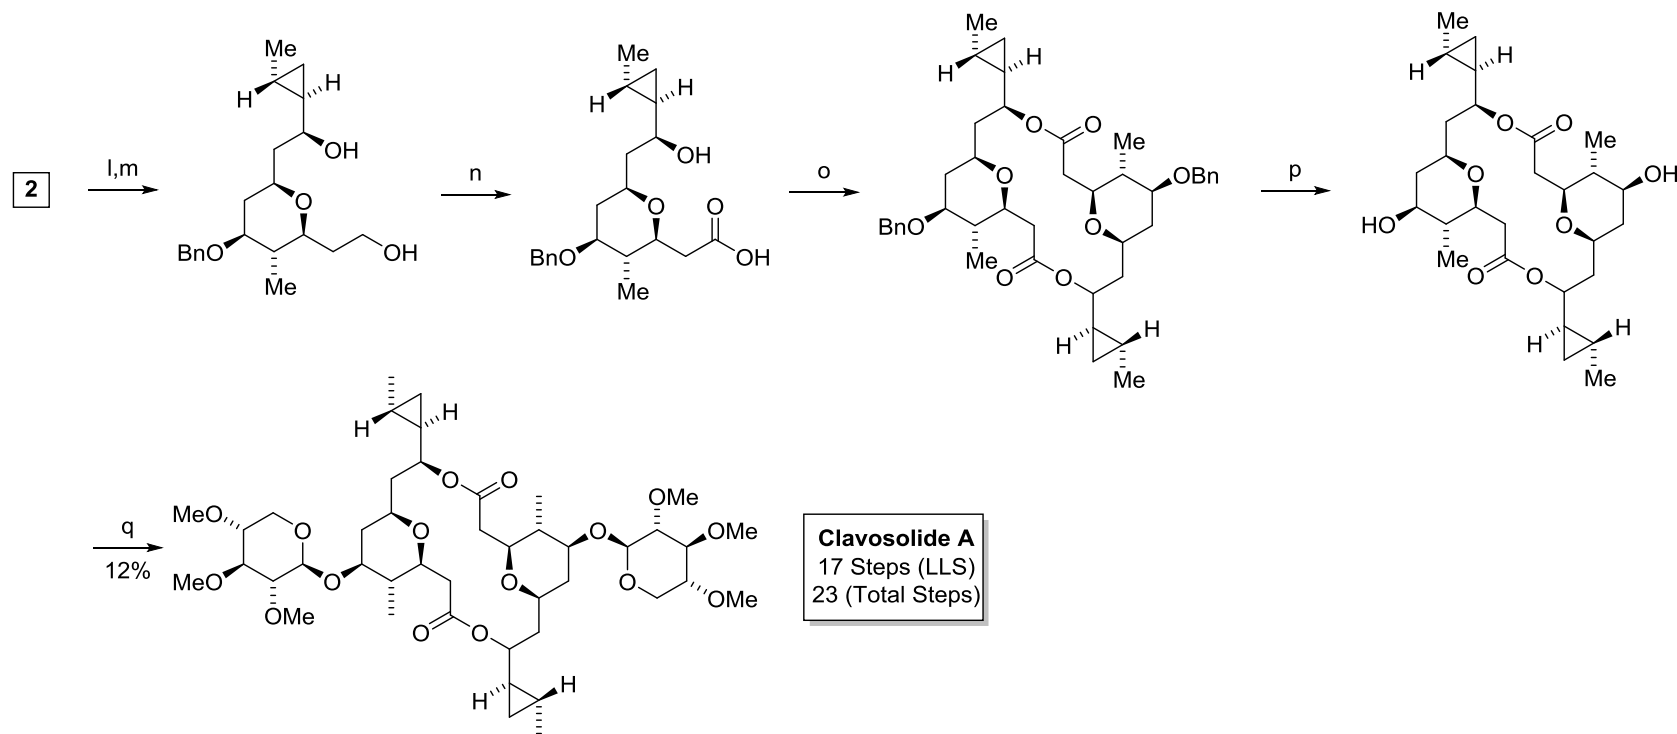

Reagents: (l) BnBr, NaH, TBAI, DMF, rt; (m) 1% HCl, EtOH; (n) TEMPO, NaOCl, KBr, TBAC, NaCl, NaHCO<sub>3</sub>, CH<sub>2</sub>Cl<sub>2</sub>/H<sub>2</sub>O, 0 °C; (o) 2,4,6-trichlorobenzoyl chloride, Et<sub>3</sub>N, then DMAP, toluene; (p) 10% Pd/C, H<sub>2</sub> (1 atm), EtOH; (q) (2*S*,3*R*,4*S*,5*R*)-3,4,5-trimethoxytetrahydro-2*H*-pyran-2-yl 2,2,2-trichloroacetimidate, TMSOTf, CH<sub>2</sub>Cl<sub>2</sub>, 4 Å MS.

I. Willis *et al.* *Org. Lett.* **2006**, *8*, 3319.

### Linear Synthesis

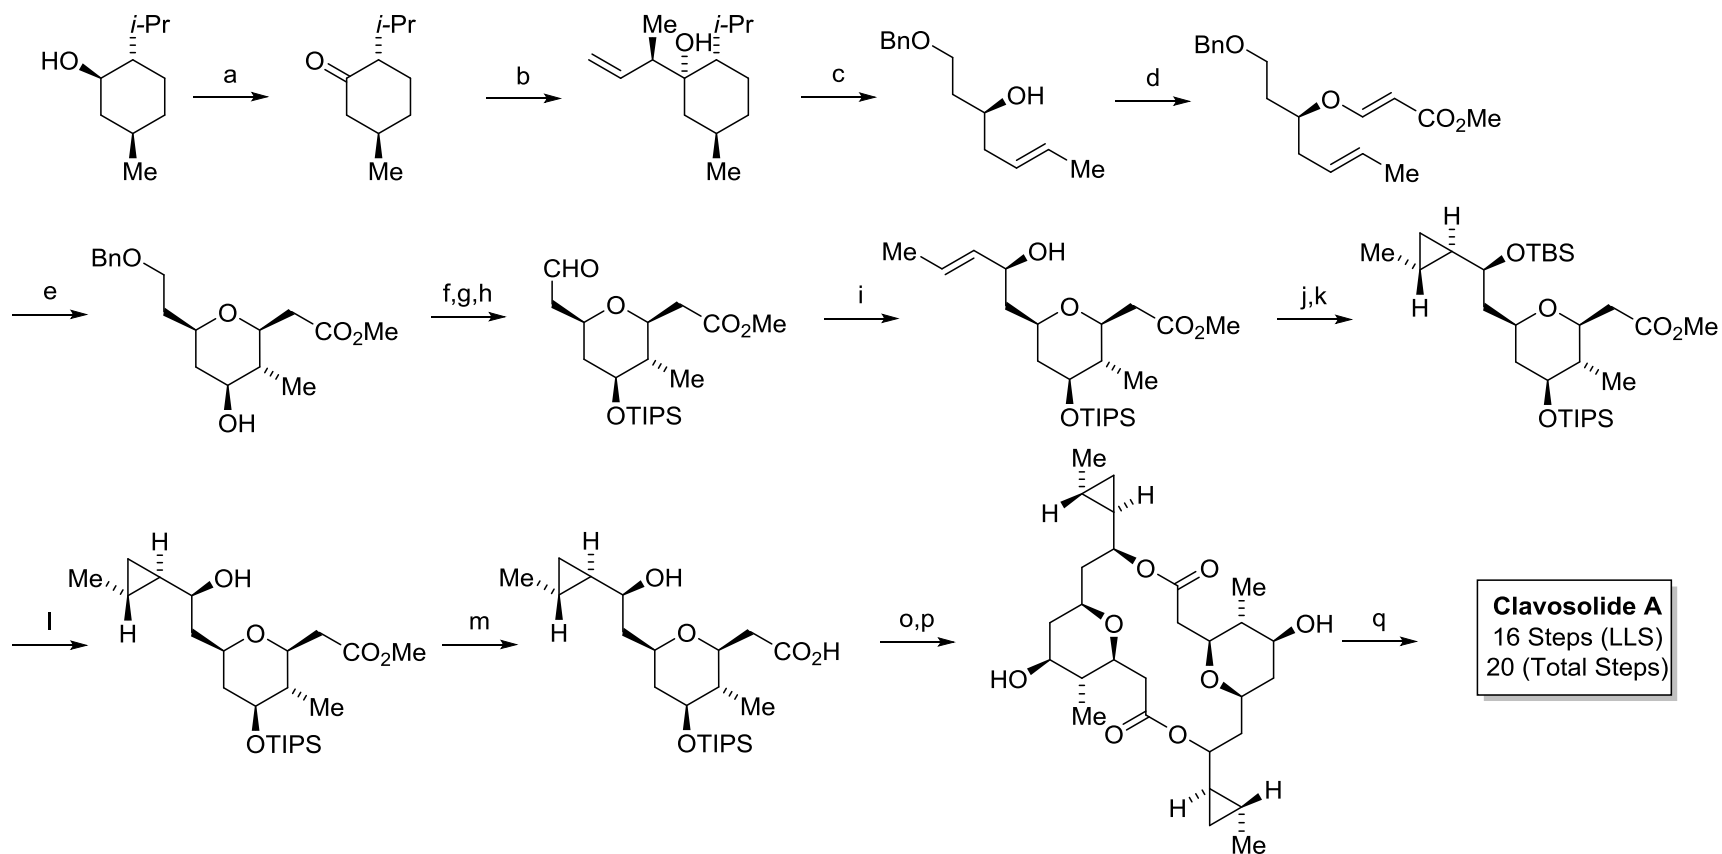

Reagents: (a) IBX, ethyl acetate, reflux; (b) but-2-enylmagnesium chloride, THF; (c) TsOH·H<sub>2</sub>O, CH<sub>2</sub>Cl<sub>2</sub>, BnOCH<sub>2</sub>CH<sub>2</sub>CHO; (d) methyl propiolate, quinuclidine; (e) TFA, CH<sub>2</sub>Cl<sub>2</sub>; (f) K<sub>2</sub>CO<sub>3</sub>, MeOH; (g) H<sub>2</sub>, Pd/C, EtOH; (h) Dess-Martin periodinane; (i) CrCl<sub>2</sub>, NiCl<sub>2</sub>, DMF; (j) TBSOTf, imidazole, DMF; (k) CH<sub>2</sub>I<sub>2</sub>, Et<sub>2</sub>Zn, CH<sub>2</sub>Cl<sub>2</sub>; (l) 1% v/v HCl, EtOH; (m) TMSO<sub>2</sub>Na, CH<sub>2</sub>Cl<sub>2</sub>; (o) 2,4,6-trichlorobenzoyl chloride, Et<sub>3</sub>N, DMAP, toluene, reflux; (p) TBAF, THF; (q) (2*S*,3*R*,4*S*,5*R*)-3,4,5-trimethoxy-2-(phenylthio)tetrahydro-2*H*-pyran, NBS, CH<sub>3</sub>CN.



**Fragment 1**

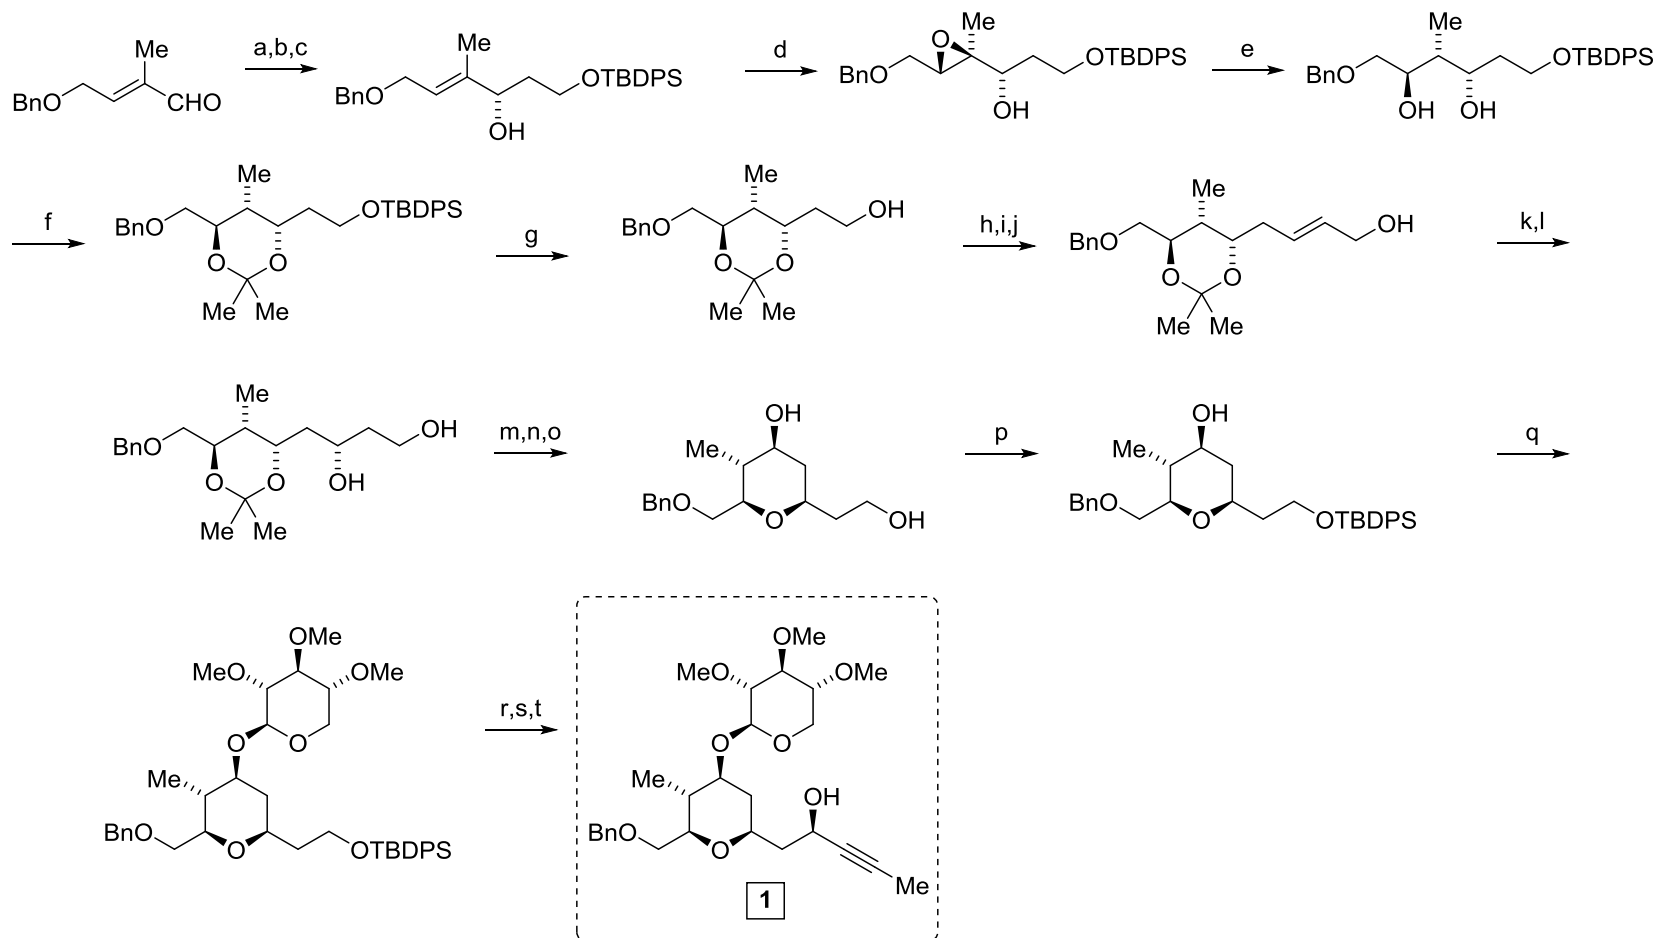

Key: (a) EtOAc, LDA, THF; (b) LAH, Et<sub>2</sub>O; (c) TBDPSCI, Et<sub>3</sub>N, DMAP, CH<sub>2</sub>Cl<sub>2</sub>; (d) (+)-DIPT, TBHP, Ti(<sup>i</sup>PrO)<sub>4</sub>, 4 Å MS, CH<sub>2</sub>Cl<sub>2</sub>; (e) Cp<sub>2</sub>TiCl, cyclohexa-1,4-diene; (f) 2,2-dimethoxypropane, CSA, CH<sub>2</sub>Cl<sub>2</sub>; (g) TBAF, THF; (h) (COCl)<sub>2</sub>, DMSO, Et<sub>3</sub>N, CH<sub>2</sub>Cl<sub>2</sub>; (i) PH<sub>3</sub>P=CHCO<sub>2</sub>Et, CH<sub>2</sub>Cl<sub>2</sub>; (j) DIBAL-H, CH<sub>2</sub>Cl<sub>2</sub>; (k) (-)-DIPT, Ti(O<sup>i</sup>Pr)<sub>4</sub>, TBHP, 4 Å MS, CH<sub>2</sub>Cl<sub>2</sub>; (l) Red-Al, THF; (m) TBDPSCI, Et<sub>3</sub>N, DMAP, DMF; (n) MsCl, Et<sub>3</sub>N, DMAP, CH<sub>2</sub>Cl<sub>2</sub>; (o) CSA, MeOH; (p) TBDPSCI, Et<sub>3</sub>N, DMAP, CH<sub>2</sub>Cl<sub>2</sub>; (q) (2R,3R,4S,5R)-3,4,5-trimethoxytetrahydro-2H-pyran-2-yl-2,2,2-trichloroacetimidate, TMSOTf, 4 Å MS, CH<sub>2</sub>Cl<sub>2</sub>; (r) TBAF, THF; (s) (COCl)<sub>2</sub>, DMSO, Et<sub>3</sub>N, CH<sub>2</sub>Cl<sub>2</sub>; (t) LDA, propyne, THF, then the aldehyde.

J. Chakraborty *et al. Tetrahedron*, **2008**, *64*, 5162. (Cont'd)

### End Game and Dimerization

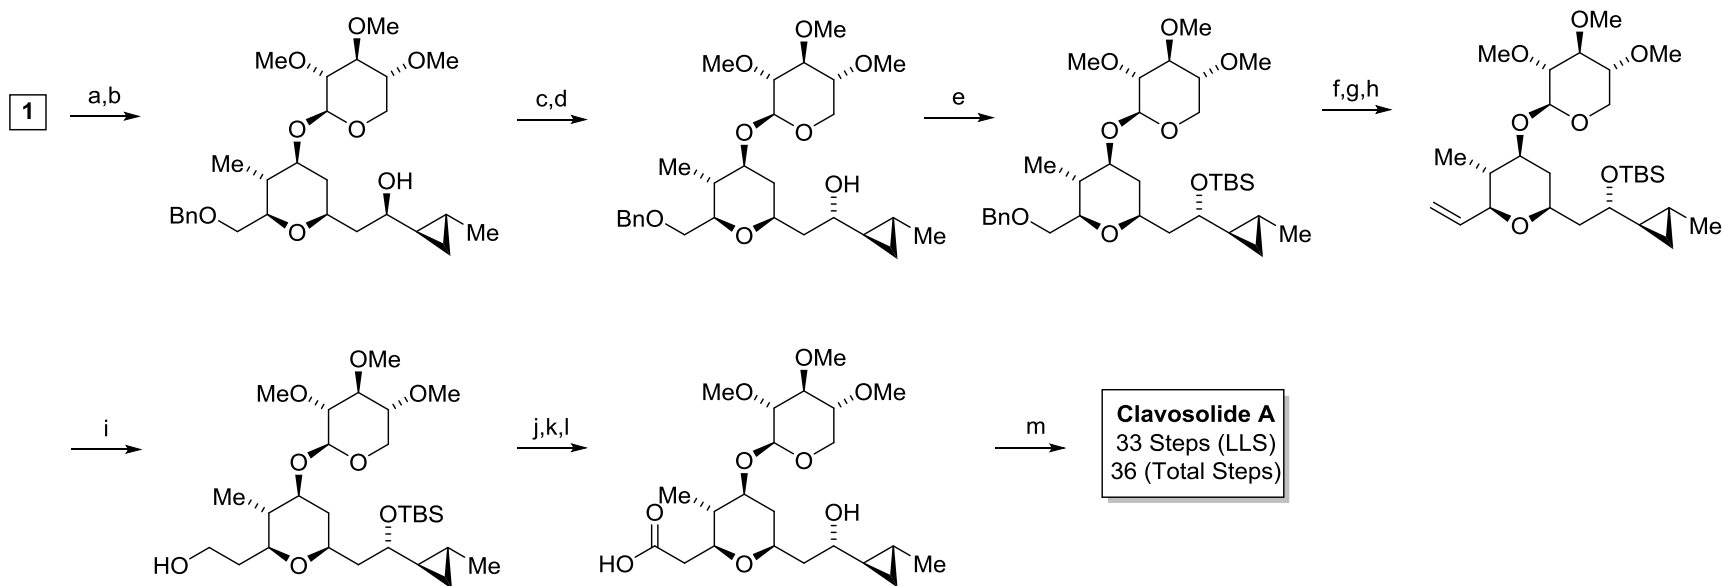

Key: (a) Red-Al, Et<sub>2</sub>O; (b) CH<sub>2</sub>I<sub>2</sub>, Et<sub>2</sub>Zn, CH<sub>2</sub>Cl<sub>2</sub>; (c) Dess-Martin periodinane, CH<sub>2</sub>Cl<sub>2</sub>; (d) LAH, THF; (e) TBSOTf, 2,6-lutidine, CH<sub>2</sub>Cl<sub>2</sub>; (f) H<sub>2</sub>, Pd-C, EtOAc; (g) Dess-Martin periodinane, CH<sub>2</sub>Cl<sub>2</sub>; (h) Ph<sub>3</sub>P=CH<sub>2</sub>, Et<sub>2</sub>O; (i) (chex)<sub>2</sub>BH, THF, then 30% H<sub>2</sub>O<sub>2</sub>, NaOH; (j) Dess-Martin periodinane, CH<sub>2</sub>Cl<sub>2</sub>; (k) NaOCl<sub>2</sub>, NaH<sub>2</sub>PO<sub>4</sub>·2H<sub>2</sub>O, 2-methyl-2-butene, <sup>t</sup>BuOH; (l) CSA, MeOH-CH<sub>2</sub>Cl<sub>2</sub> (1:1); (m) 2,4,6-trichlorobenzoyl chloride, Et<sub>3</sub>N, THF, then DMAP, toluene.

K. Jennings *et al.* *Org. Lett.* **2009**, *11*, 769.

### Linear Synthesis

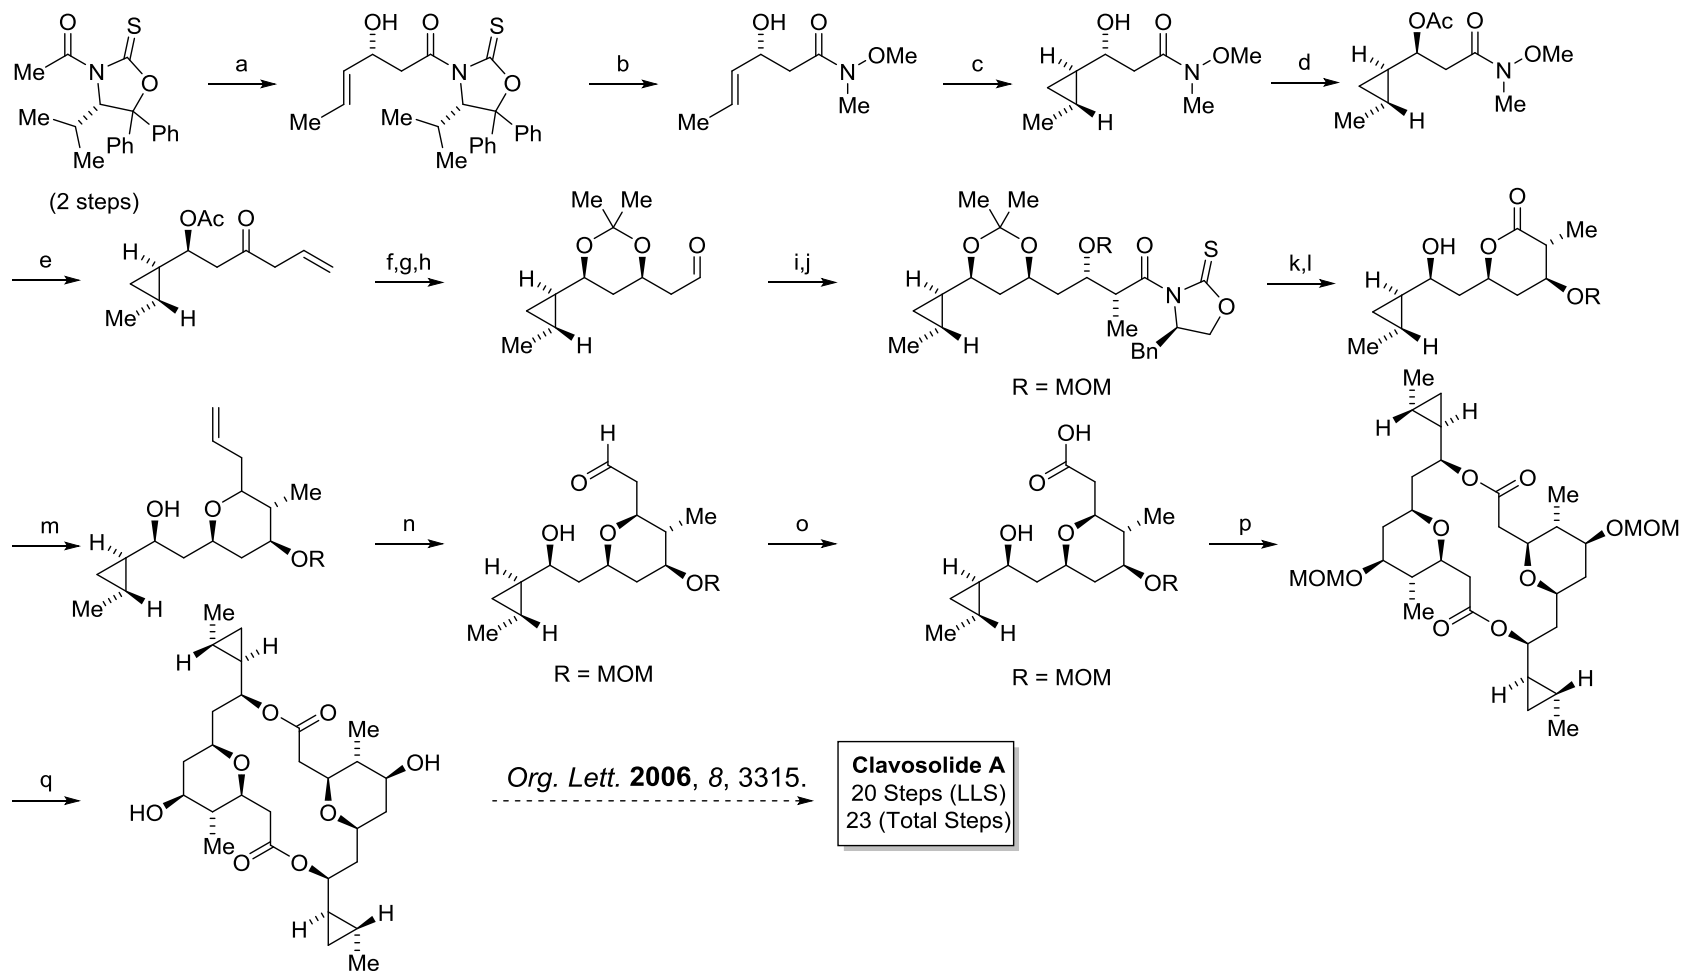

Key: (a)  $\text{TiCl}_4$ , (-)-sparteine, NMP, (*E*)-crotonaldehyde,  $\text{CH}_2\text{Cl}_2$ ; (b) imidazole,  $\text{MeN(H)OMe}\cdot\text{HCl}$ ,  $\text{CH}_2\text{Cl}_2$ ; (c)  $\text{Et}_2\text{Zn}$ ,  $\text{CH}_2\text{I}_2$ ,  $\text{CH}_2\text{Cl}_2$ ; (d) DIAD,  $\text{PPh}_3$ , HOAc, toluene; (e) allylmagnesium bromide, THF; (f)  $\text{Et}_2\text{BOMe}$ ,  $\text{NaBH}_4$ , THF; (g) DMP, PPTS,  $\text{CH}_2\text{Cl}_2$ ; (h)  $\text{O}_3$ , Sudan III,  $\text{CH}_2\text{Cl}_2$ ; (i)  $^t\text{BuBOTf}$ ,  $\text{Et}_3\text{N}$ , (*R*)-4-benzyl-3-propionyloxazolidin-2-one,  $\text{CH}_2\text{Cl}_2$ ; (j) MOMCl, DIPEA,  $\text{CH}_2\text{Cl}_2$ ; (k)  $\text{BnOLi}$ , THF; (l) TFA, THF; (m) (i) allylmagnesium bromide, THF; (ii) TFA then  $\text{Et}_3\text{SiH}$ ; (n)  $\text{O}_3$ , Sudan III,  $\text{CH}_2\text{Cl}_2$ ; (o)  $\text{NaOCl}_2$ ,  $\text{NaH}_2\text{PO}_4$ , 2-methyl-2-butene,  $^t\text{BuOH}$ ; (p) 2,4,6-trichlorobenzoyl chloride, DMAP, toluene; (q) 2-bromobenzo[*d*][1,3,2]dioxaborole,  $\text{CH}_2\text{Cl}_2$ .

L. Floreancig *et al.* *Org. Lett.* **2012**, *14*, 5614.

### Fragment 1

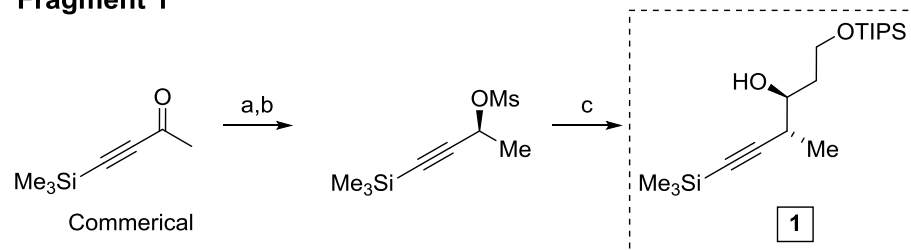

Key: (a) (*S,S*)-Noyori-TsDPEN, CH<sub>2</sub>Cl<sub>2</sub>, Et<sub>3</sub>N, then formic acid; (b) MsCl, Et<sub>3</sub>N, CH<sub>2</sub>Cl<sub>2</sub>; (c) 3-((triisopropylsilyloxy)propanal, Et<sub>2</sub>Zn, Pd(OAc)<sub>2</sub>, Ph<sub>3</sub>P, CH<sub>2</sub>Cl<sub>2</sub>.

### Linear Synthesis

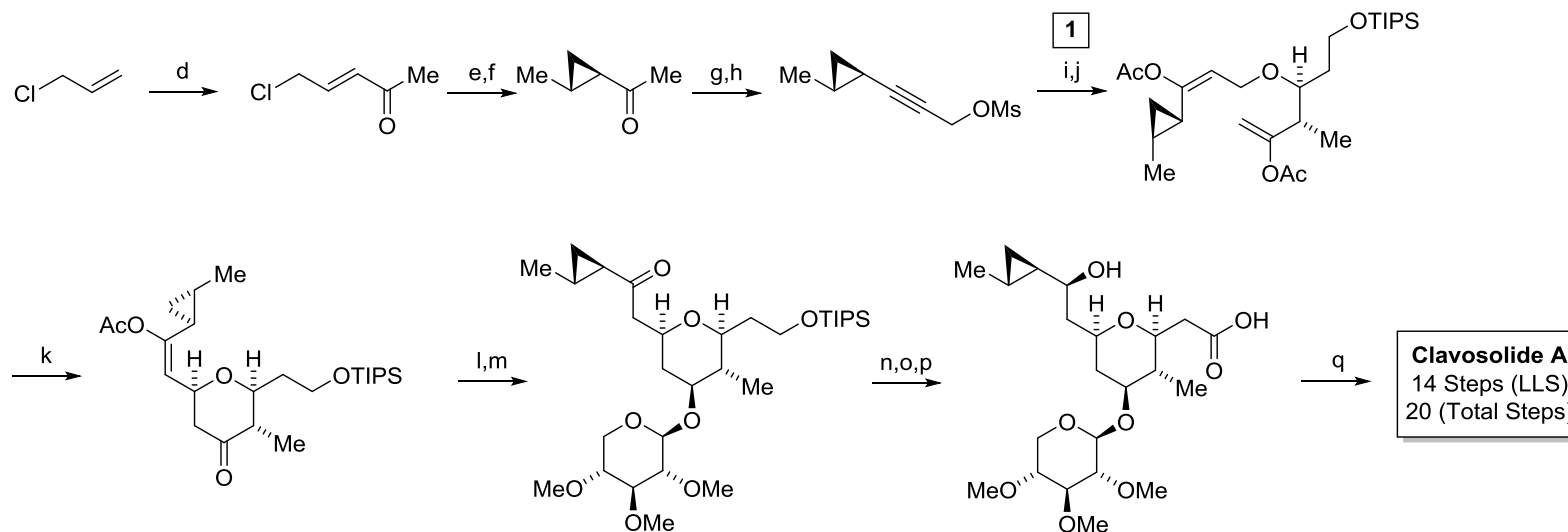

Key: (d) AcCl, AlCl<sub>3</sub>, CH<sub>2</sub>Cl<sub>2</sub>, then Et<sub>3</sub>N; (e) MeMgBr, CuI, (*R*)-ToIBINAP, <sup>t</sup>BuOMe; (f) NaOH, H<sub>2</sub>O; (g) LDA, THF, then (EtO)<sub>2</sub>P(O)Cl, then LDA, then (CH<sub>2</sub>O)<sub>n</sub>; (h) MsCl, Et<sub>3</sub>N, CH<sub>2</sub>Cl<sub>2</sub>; (i) NaH, 15-C-5, THF, then **1**; (j) [(*p*-cymene)RuCl<sub>2</sub>]<sub>2</sub>, HOAc, Na<sub>2</sub>CO<sub>3</sub>, PhMe; (k) DDQ, LiClO<sub>4</sub>, 2,6-Cl<sub>2</sub>Py, DCE; (l) NaBH<sub>4</sub>, MeOH, then K<sub>2</sub>CO<sub>3</sub>, MeOH; (m) (2*S*,3*R*,4*S*,5*R*)-3,4,5-trimethoxy-tetrahydro-2*H*-pyran-2-yl 2,2,2-trichloroacetimidate, TMSOTf, CH<sub>2</sub>Cl<sub>2</sub>; (n) BH<sub>3</sub>·SMe<sub>2</sub>, (*R*)-1-methyl-3,3-diphenylhexahydropyrrolo[1,2-*c*][1,3,2]oxazaborole, THF; (o) HCl, EtOH; (p) TEMPO, NaOCl, KBr, Bu<sub>4</sub>NCl, NaHCO<sub>3</sub>, CH<sub>2</sub>Cl<sub>2</sub>, H<sub>2</sub>O; (q) 2,4,6-trichlorobenzoyl chloride, Et<sub>3</sub>N, THF, then DMAP, toluene.

M. Breit *et al.* *Angew. Chem. Int. Ed.* **2015**, *54*, 15530.

### Synthesis of Starting Materials

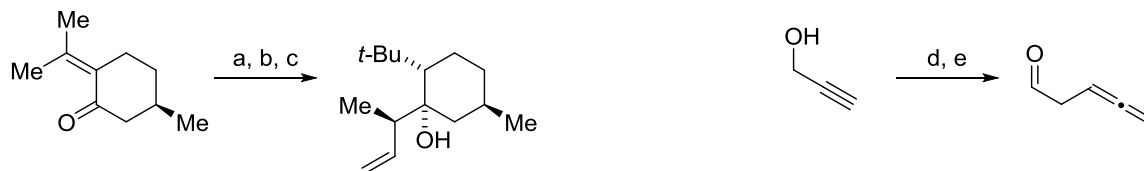

Key: a)  $\text{AlMe}_3$ , TMSCl, CuBr (cat.), b) KOH, c) *E*-crotyl chloride, Mg, d)  $(\text{EtO}_3)\text{COMe}$ ,  $\text{MeCH}_2\text{CO}_2\text{H}$ , e) DIBAL-H.

### Summary of Synthesis

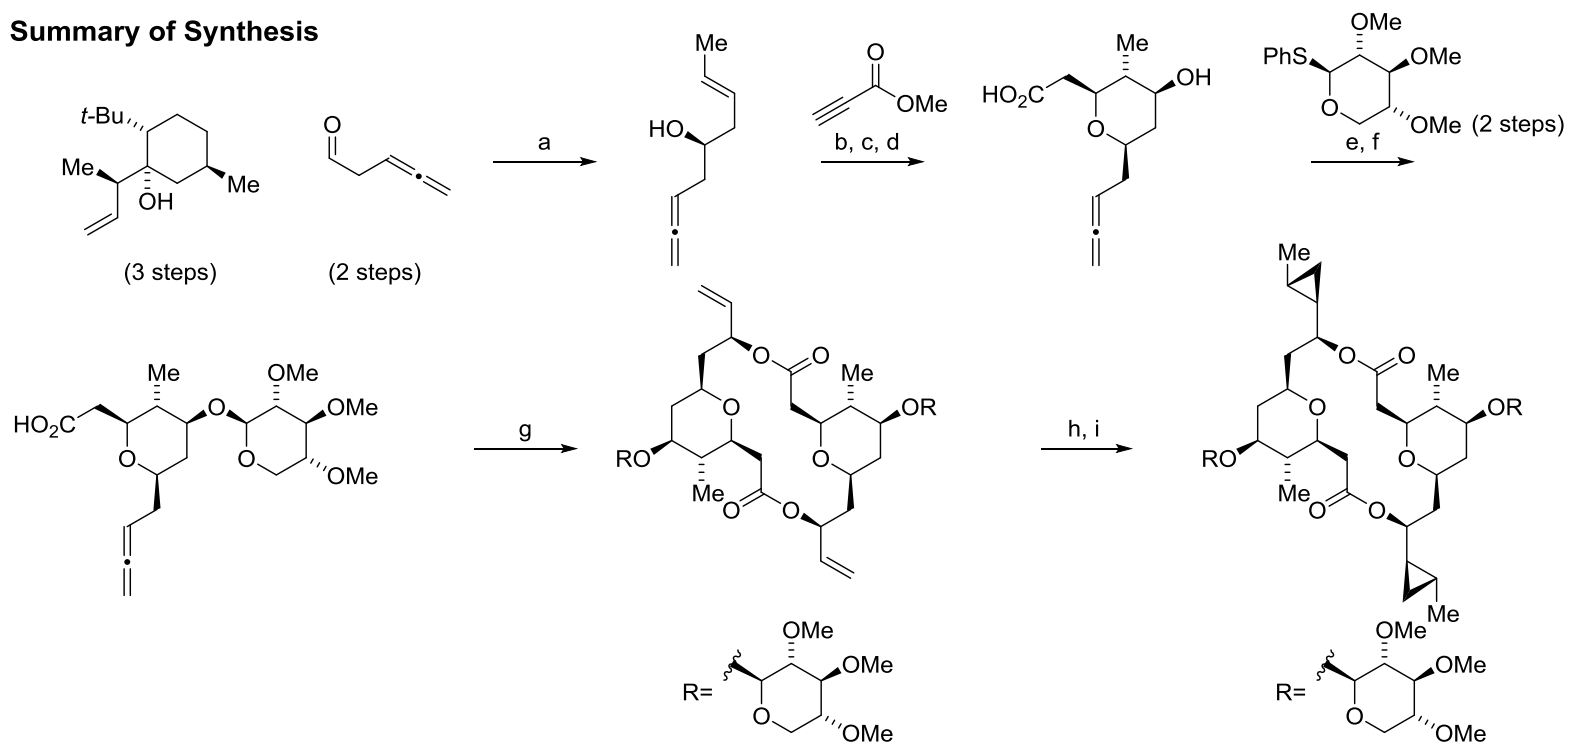

**Cavosolide A**  
12 Steps LLS, 16 Total steps

Key: a)  $p\text{TsOH-H}_2\text{O}$ , b) ynone, quinuclidine, TFA, c)  $\text{K}_2\text{CO}_3$ , MeOH, d) LiOH,  $\text{H}_2\text{O}$ , e) MeOTf, 4Å MS, sugar, f) LiOH,  $\text{H}_2\text{O}$ , g)  $[\text{Rh}(\text{cod})\text{Cl}]_2$ , (*R,R*)-DIOP,  $\text{Cs}_2\text{CO}_3$ , h) Grubbs II, (*Z*)-2-butene, i)  $\text{ICH}_2\text{Cl}$ ,  $\text{Et}_2\text{Zn}$ .

N. Kim, Hong *et al. Tetrahedron Lett.* **2015**, 56, 3120.

## Synthesis

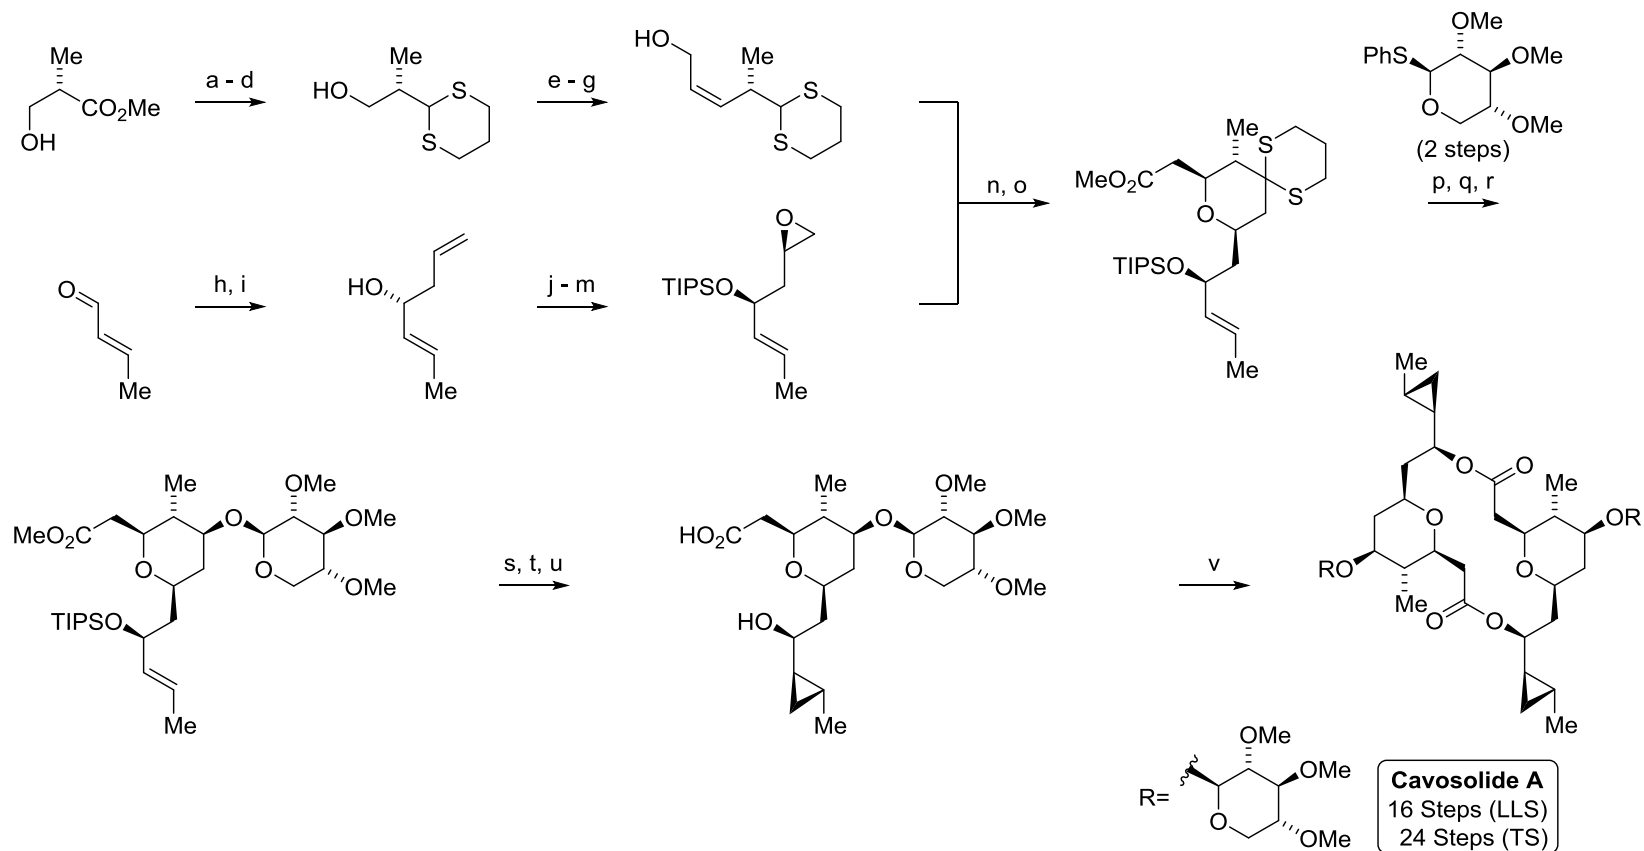

Key: a)  $\text{TrCl}$ ,  $\text{Et}_3\text{N}$ ; b) LAH; c)  $(\text{COCl})_2$ , DMSO, *i*- $\text{Pr}_2\text{EtN}$ ; d)  $\text{HS}(\text{CH}_2)_3\text{SH}$ ,  $\text{BF}_3\text{-OEt}_2$ ; e)  $\text{SO}_3$ -pyridine, DMSO, *i*- $\text{Pr}_2\text{EtN}$ ; f)  $(\text{MeO})_2\text{POCH}_2\text{CO}_2\text{Me}$ , KHMDS, 18-crown-6; g) DIBAL-H; h) allyl bromide, Zn; i) (-)-DIPT,  $\text{Ti}(\text{O}i\text{-Pr})_4$ , TBHP, 4Å MS (resolution); j)  $\text{Boc}_2\text{O}$ , DMAP; k) NIS; l)  $\text{K}_2\text{CO}_3$ ; m) NaH, TIPSOTf; n) *t*-BuLi, HMPA; o)  $\text{MnO}_2$ , then  $\text{Me}_2$ -triazolium I, DBU,  $\text{MnO}_2$ , 4Å MS, MeOH; p)  $\text{I}_2$ ,  $\text{NaHCO}_3$ ; q)  $\text{NaBH}_4$ ; r) sugar, MeOTf, 4Å MS; s)  $\text{ClCH}_2\text{I}$ ,  $\text{Et}_2\text{Zn}$ ; t) TBAF; u) LiOH,  $\text{H}_2\text{O}$ ; v) MNBA, DMAP.

O. Aggarwal *et al. Angew. Chem. Int. Ed.* **2016**, *55*, 2498.

### Sugar and Boronate Synthesis

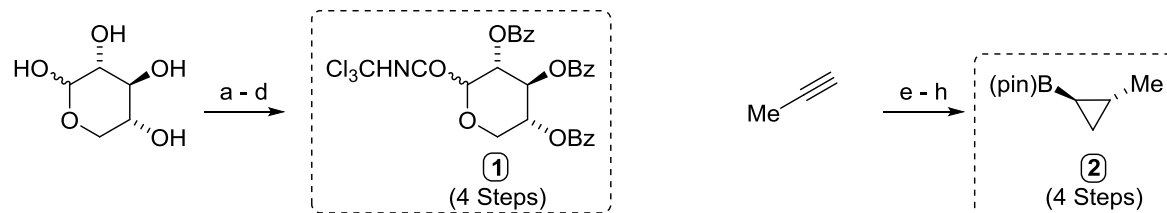

Key: a) BzCl, DMAP, pyr, b) HBr, AcOH, c) Ag<sub>2</sub>CO<sub>3</sub>, H<sub>2</sub>O, acetone, d) DBU, CNCCl<sub>3</sub>, e) HBBr-SMe<sub>2</sub>, then NaOH, then HCl, f) diethanolamine, g) Me<sub>4</sub>-D-tartaramide, h) Et<sub>2</sub>Zn, CH<sub>2</sub>I<sub>2</sub>, tartaramide, then pinacol.

### Synthesis of Fragment 3

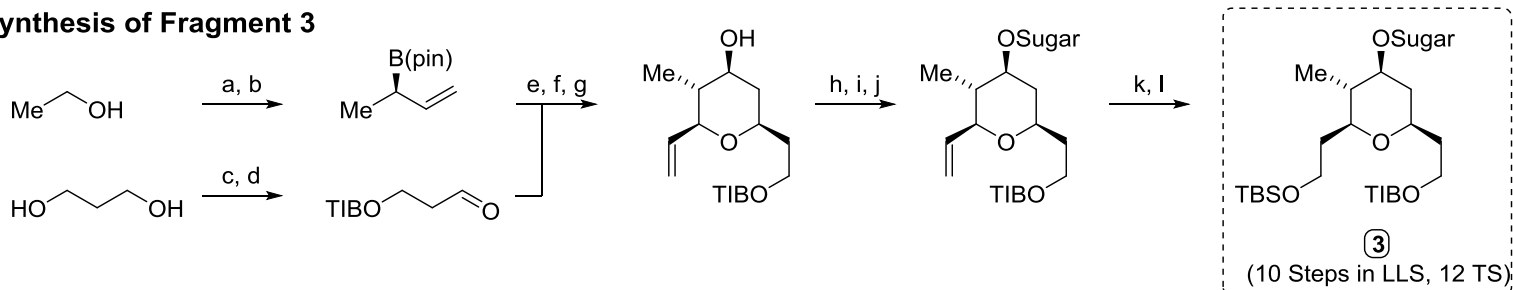

Key: a) Cl(CO)Ni/Pr<sub>2</sub>, Et<sub>3</sub>N, b) *s*-BuLi, (-)-sparteine, then vinyl-B(pin), MgBr<sub>2</sub>-Et<sub>2</sub>O, c) TIB-Cl, NaH, d) TEMPO, KBr, NaHCO<sub>3</sub>, NaClO, e) *n*-BuLi, TFAA, then aldehyde, f) acrolein, TFA, g) K<sub>2</sub>CO<sub>3</sub>, h) **1**, TMSOTf, 4Å MS, i) NaOMe, j) MeI, NaH, k) Cy<sub>2</sub>BH, then H<sub>2</sub>O<sub>2</sub>, KOH, l) TBSCl, Et<sub>3</sub>N.

### Fragment Union and End Game

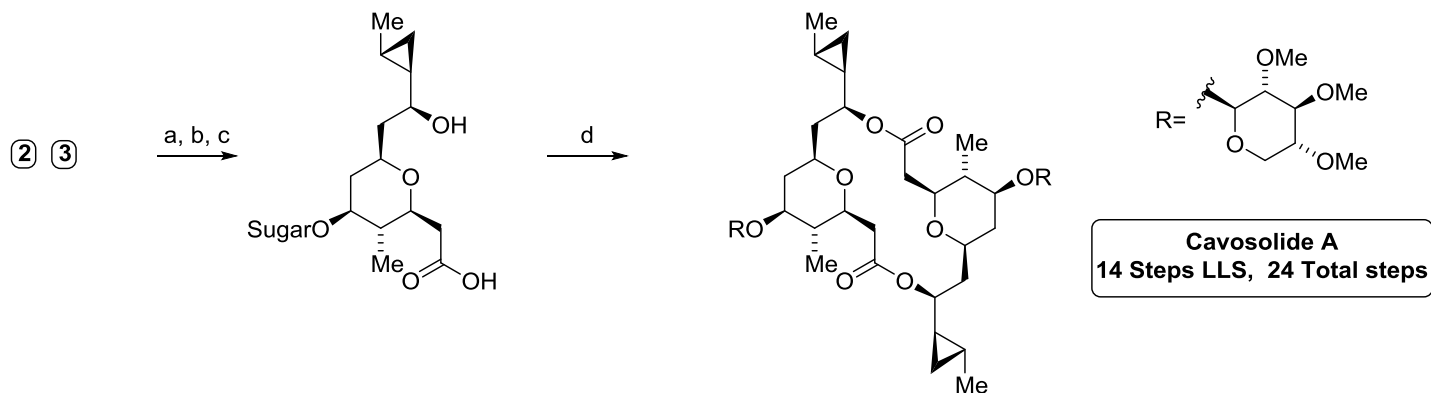

Key: a) *s*-BuLi, (+)-sparteine, then **2**, then NaOH, H<sub>2</sub>O<sub>2</sub>, b) HCl, c) TEMPO, KBr, NaHCO<sub>3</sub>, NaOCl, d) 2,4,6-*t*-Pr<sub>3</sub>BzCl, Et<sub>3</sub>N, then DMAP.

## Graphical Summary of Previous Syntheses of Zincophorin

A. Danishefsky *et al.* *J. Am. Chem. Soc.* **1987**, *109*, 1572; *J. Am. Chem. Soc.* **1988**, *110*, 4368.

### Reagents

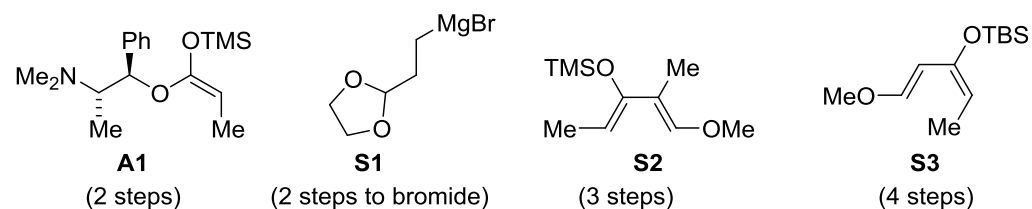

### Fragment 1

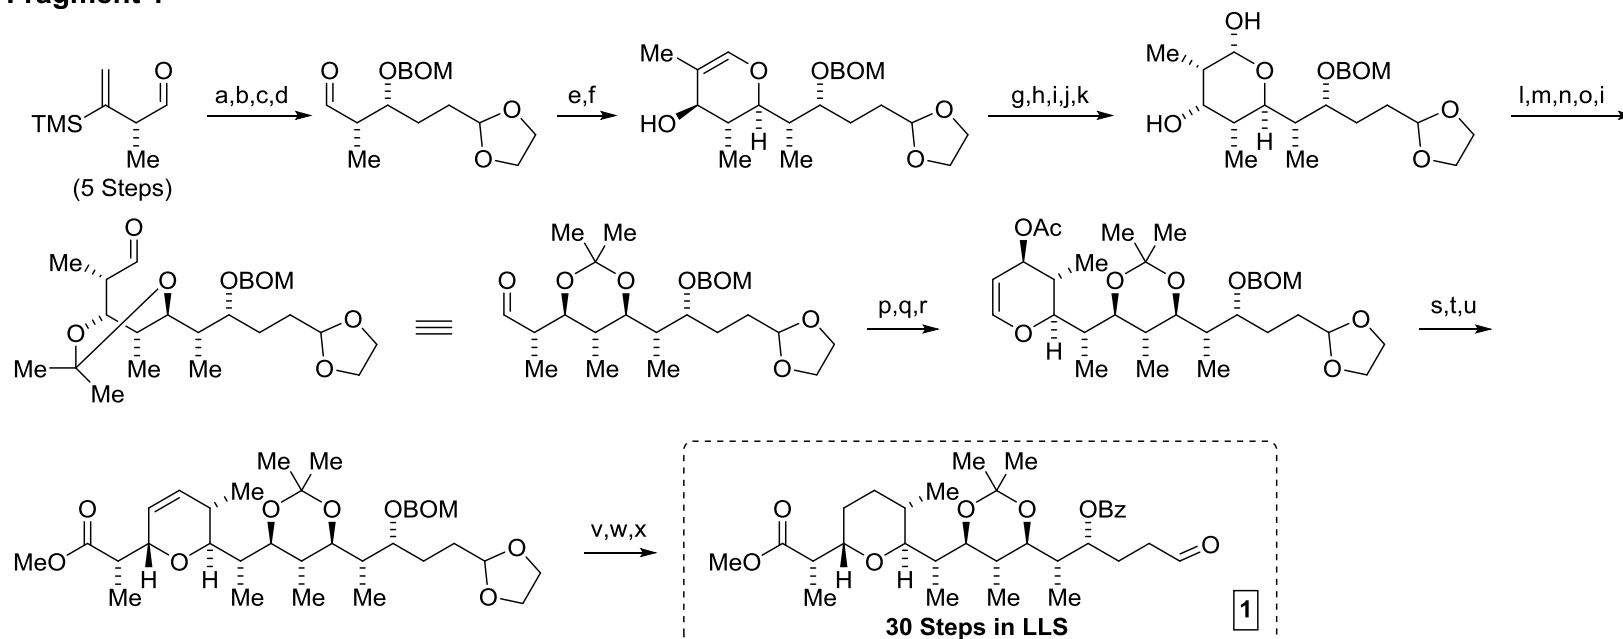

Key: (a) **S1**; (b) NaH, HMPA, then H<sub>2</sub>O; (c) BOMCl, *i*-Pr<sub>2</sub>EtN; (d) Ozonolysis; (e) **S2**, MgBr<sub>2</sub>; (f) NaBH<sub>4</sub>, CeCl<sub>3</sub>; (g) 3,4-(OMe)<sub>2</sub>PhCH<sub>2</sub>Cl, *p*-TsOH; (h) BH<sub>3</sub>-THF, then H<sub>2</sub>O<sub>2</sub>, NaOH; (i) (COCl)<sub>2</sub>, DMSO, then Et<sub>3</sub>N; (j) L-Selectride; (k) DDQ; (l) LiBH<sub>4</sub>; (m) TBDPSCI; (n) Me<sub>2</sub>C(OMe)<sub>2</sub>, PPTS; (o) TBAF; (p) **S3**; (q) NaBH<sub>4</sub>, CeCl<sub>3</sub>; (r) Ac<sub>2</sub>O, DMAP; (s) (*E*)-crotylsilane, BF<sub>3</sub>-OEt<sub>2</sub>; (t) OsO<sub>4</sub>, NaIO<sub>4</sub>; (u) CrO<sub>3</sub>; (v) H<sub>2</sub>, Pd-C; (w) BzCl, pyridine; (x) *p*-TsOH.



A. Danishefsky *et al.* *J. Am. Chem. Soc.* **1987**, *109*, 1572; *J. Am. Chem. Soc.* **1988**, *110*, 4368. (Cont'd)

### Fragment 2

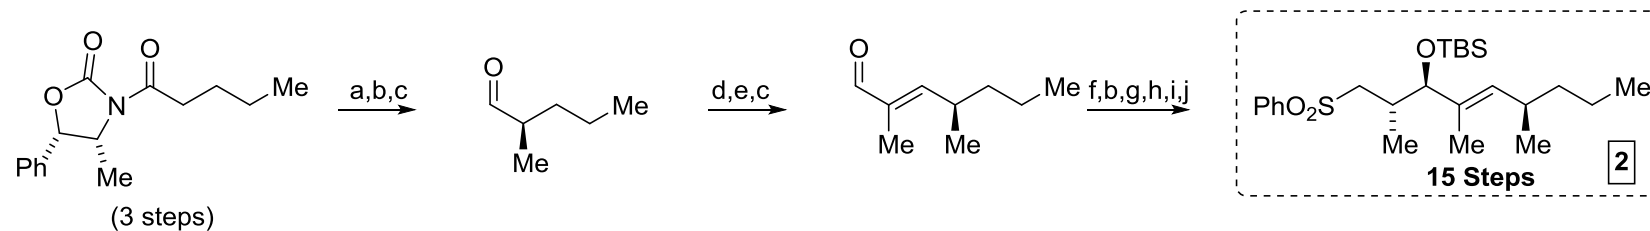

Key: (a) LDA, then MeI; (b) LAH; (c) (COCl)<sub>2</sub>, DMSO, then Et<sub>3</sub>N; (d) Ph<sub>3</sub>PC(Me)CO<sub>2</sub>Et; (e) DIBAL-H; (f) **A1**, TiCl<sub>4</sub>; (g) *p*-TsCl, pyridine, DMAP; (h) TBSOTf, Et<sub>3</sub>N; (i) KSPH; (j) PhSeSePh, H<sub>2</sub>O<sub>2</sub>.

### Fragment Union and End Game

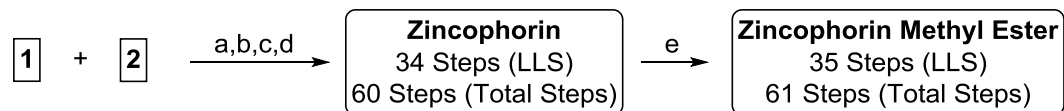

Key: (a) *n*-BuLi, MgBr<sub>2</sub>; (b) Na/Hg; (c) 1M HCl/MeOH/THF; (d) 2.0 M LiOH in MeOH/THF, then 1N HCl; (e) CH<sub>2</sub>N<sub>2</sub>.

B. Cossy *Org. Lett.* **2003**, *5*, 4037; *J. Org. Chem.* **2004**, *69*, 4626.

Reagents

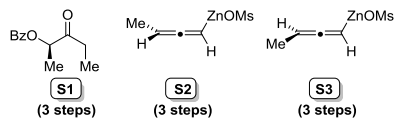

Fragment 1

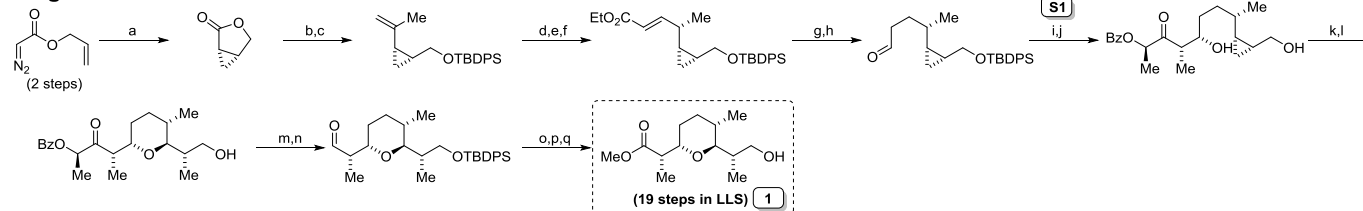

Key: (a)  $\text{Rh}_2(\text{R-MEPY})_4$ ; (b) MeLi, then TBDPSCl; (c) MsCl,  $\text{NEt}_3$ , DMAP; (d)  $\text{BH}_3\text{-THF}$ ,  $\text{H}_2\text{O}_2$ ; (e) PCC, 4A MS; (f)  $(\text{EtO})_2\text{P}(\text{O})\text{CH}_2\text{COOEt}$ ; (g)  $\text{H}_2$ ,  $\text{PtO}_2$ ; (h) DIBAL-H; (i)  $\text{Cy}_2\text{BCl}$ ,  $\text{Et}_2\text{NMe}$ ; (j) HF-Py; (k)  $\text{Hg}(\text{TFA})_2$ , KBr; (l)  $\text{Bu}_3\text{SnH}$ ; (m) TBDPSCl, IM; (n)  $\text{LiBH}_4$ , then  $\text{NaIO}_4$ ; (o)  $\text{NaClO}_2$ ; (p)  $\text{TMSCHN}_2$ ; (q) HF-Py

Fragment 2

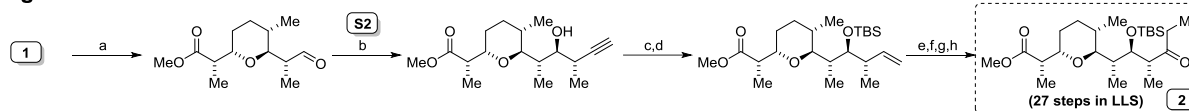

Key: (a) DMP; (b)  $\text{Pd}(\text{OAc})_2$ ,  $\text{PPh}_3$ ,  $\text{ZnEt}_2$ ; (c)  $\text{H}_2$ ,  $\text{Pd}/\text{BaSO}_4$ ; (d) TBSOTf, 2,6-lutidine; (e)  $\text{OsO}_4$ , NMO; (f)  $\text{NaIO}_4$ ; (g)  $\text{Et}_2\text{CuLi}$ ; (h) DMP

Fragment 3

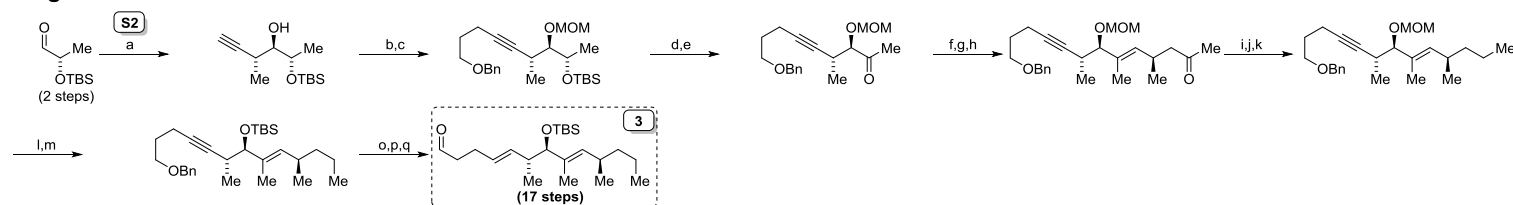

Key: (a)  $\text{Pd}(\text{OAc})_2$ ,  $\text{PPh}_3$ ,  $\text{ZnEt}_2$ ; (b) MOMCl; (c) BuLi, RBr, HMPA; (d) TBAF; (e) DMP, Py; (f) (Z)-propenyl MgBr,  $\text{MgBr}_2\text{-OEt}_2$ ; (g) diketene, DMAP; (h)  $\text{Al}_2\text{O}_3$ ; (i) DIBAL-H; (j) MsCl,  $\text{NEt}_3$ ; (k) LAH; (l) TsOH; (m) TBSOTf; (n) Li,  $\text{NH}_3$ ; (o) DMP, Py.

Fragment Union and End Game

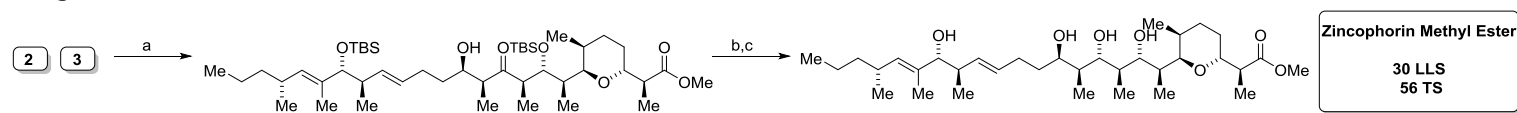

Key: (a)  $\text{TiCl}_4$ ; (b)  $\text{NaBH}_4$ ; (c) HF-Py

C. Miyashita *et al. Angew. Chem. Int. Ed.* **2004**, *43*, 4341.

### Starting Materials

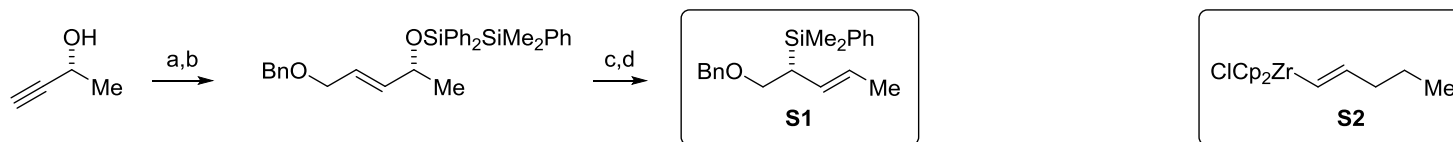

Key: (a)  $(\text{SiClPh}_2\text{SiMe}_2\text{Ph})$ ,  $\text{Et}_3\text{N}$ ; (b)  $\text{Cp}_2\text{Zr}(\text{H})\text{Cl}$ , then  $\text{Me}_2\text{Zn}$ , 4Å sieves, BOMCl; (c)  $\text{Pd}(\text{acac})_2$ ,  $t\text{-BuCH}_2\text{C}(\text{Me})_2\text{NC}$ ; (d)  $n\text{-BuLi}$ . (Fukuda, K.; Miyashita, M.; Tanino, K. *Tetrahedron Lett.* **2010**, *51*, 4523.)

### Fragment 1

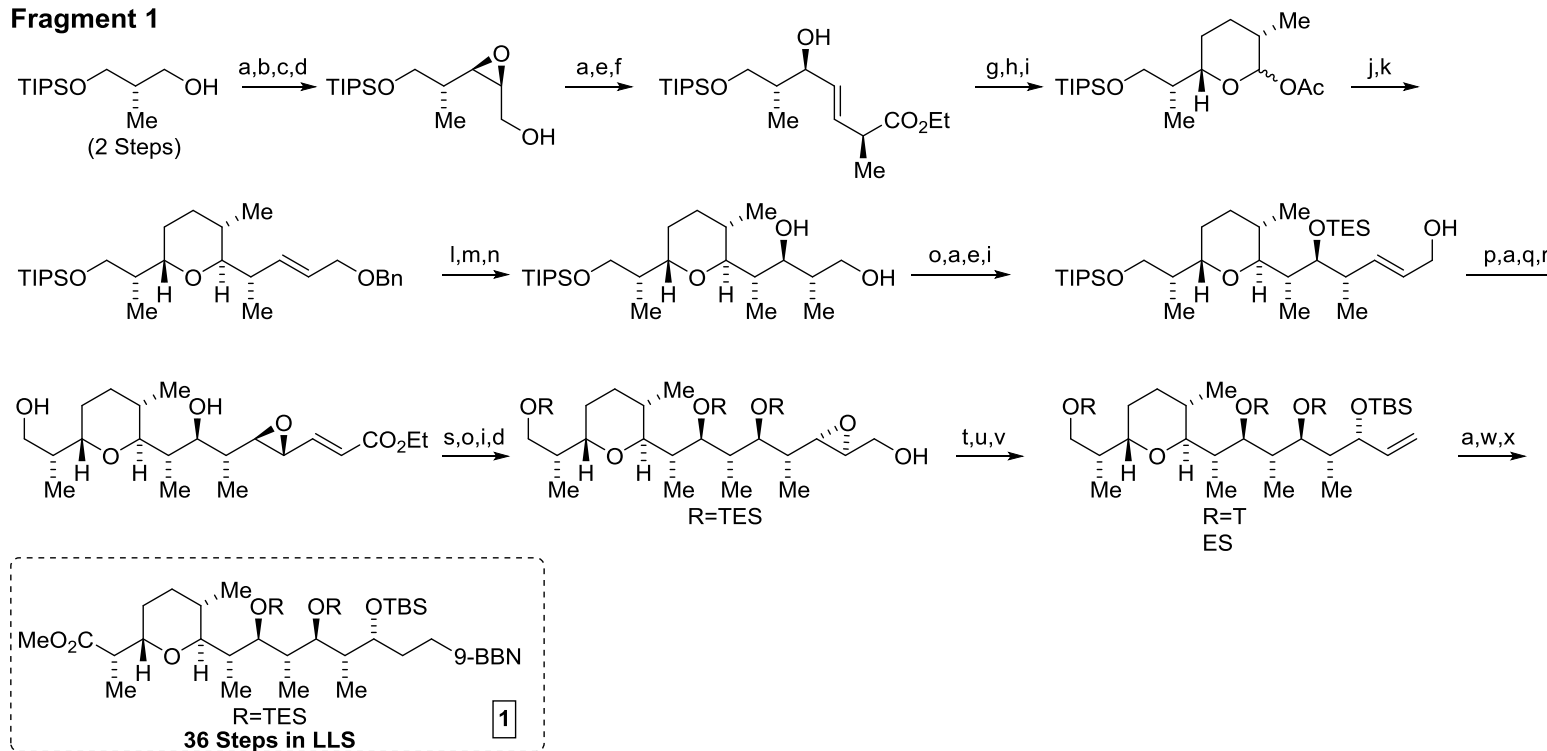

Key: (a)  $(\text{COCl})_2$ , DMSO, then  $\text{Et}_3\text{N}$ ; (b)  $(o\text{-Me-PhO})_2\text{P}(\text{O})\text{CH}_2\text{CO}_2\text{Et}$ , NaH; (c) DIBAL-H; (d) MCPBA; (e)  $(i\text{-PrO})_2\text{P}(\text{O})\text{CH}_2\text{CO}_2\text{Et}$ ,  $t\text{-BuOK}$ ; (f)  $\text{Me}_2\text{Zn-CuCN}$ ; (g)  $\text{H}_2$ ,  $\text{PtO}_2$ ; (h)  $\text{Ti}(\text{O-}i\text{-Pr})_4$ ; (i) DIBAL-H, then  $\text{Ac}_2\text{O}$ , pyridine; (j) **S1**,  $\text{TiCl}(\text{O-}i\text{-Pr})_4$ ; (k) TIPSOTf, 2,6-lutidine; (l) Ca,  $\text{NH}_3$ ; (m)  $\text{Ti}(\text{O-}i\text{-Pr})_4$ , D-(–)-DIPT,  $t\text{-BuOOH}$ , 4Å sieves; (n)  $\text{Me}_2\text{CuLi}$ ; (o) TESOTf, 2,6-lutidine; (p)  $\text{Ti}(\text{O-}i\text{-Pr})_4$ , D-(–)-DET,  $t\text{-BuOOH}$ , 4Å sieves; (q)  $(\text{EtO})_2\text{P}(\text{O})\text{CH}_2\text{CO}_2\text{Et}$ , NaH; (r) TBAF; (s)  $\text{Me}_3\text{Al-D}_2\text{O}$ ; (t)  $\text{PPh}_3$ ,  $\text{I}_2$ , imidazole; (u) BuLi; (v) TBSCl, DMAP; (w)  $\text{NaClO}_2$ ,  $\text{NaH}_2\text{PO}_4$ , 2-methyl-2-butene; (x)  $\text{TMSCHN}_2$  (y) 9-BBN.

C. Miyashita *et al.* *Angew. Chem. Int. Ed.* **2004**, *43*, 4341. (Cont'd)

### Fragment 2

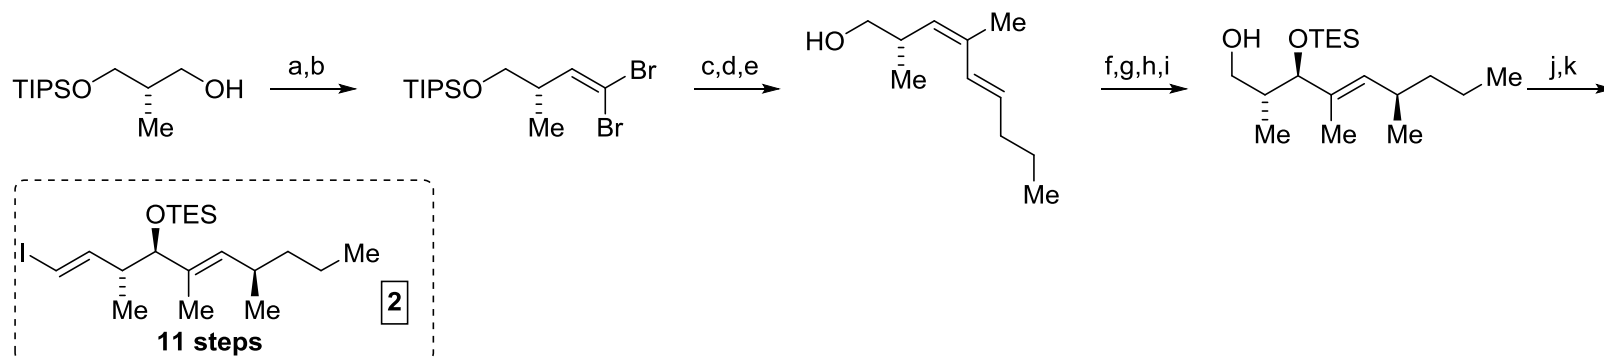

### Fragment Union and End Game

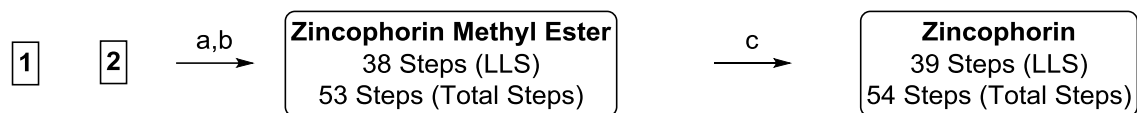

Key: (a) aq. Cs<sub>2</sub>CO<sub>3</sub>, AsPh<sub>3</sub>, [PdCl<sub>2</sub>(dppf)]; (b) TEAF; (c) LiOH, H<sub>2</sub>O/MeOH/THF.

D. Leighton *et al.* *J. Am. Chem. Soc.* **2011**, *133*, 7308.

### Chiral Auxiliary Synthesis

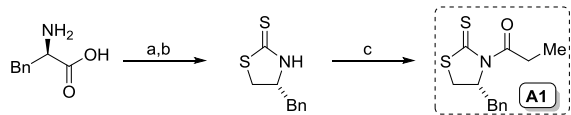

(3 steps from inexpensive chemicals)

Key: (a) NaBH<sub>4</sub>, I<sub>2</sub>; (b) KOH, CS<sub>2</sub>, H<sub>2</sub>O, reflux; (c) propionyl chloride, DMAP, TEA.

### Fragment 1

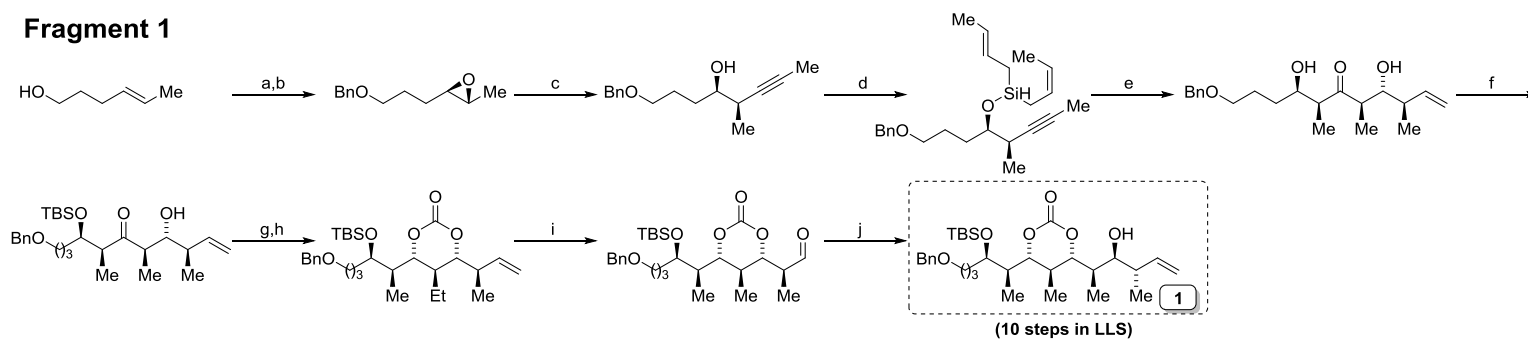

(10 steps in LLS)

Key: (a) NaH, BnBr; (b) Shi epoxidation, oxone, Na<sub>2</sub>EDTA; (c) Propyne, BuLi, AlMe<sub>3</sub>; (d) dicrotysilane, NaH; (e) Rh(acac)(CO)<sub>2</sub>, then H<sub>2</sub>O<sub>2</sub>, KF; (f) TBSOTf, 2,6-lutidine; (g) DIBAL-H; (h) CDI; (i) OsO<sub>4</sub>, NMO, then NaIO<sub>4</sub>; (j) K-trifluoroacrylate, TBAI.

### Fragment 2

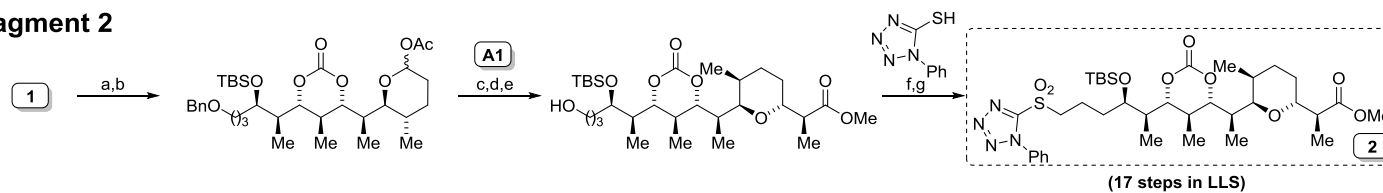

(17 steps in LLS)

Key: (a) Rh(acac)(CO)<sub>2</sub>, PPh<sub>3</sub>, CO/H<sub>2</sub>; (b) Ac<sub>2</sub>O, Py, DMAP; (c) TiCl<sub>4</sub>, SnCl<sub>4</sub>, *i*Pr<sub>2</sub>NEt; (d) DMAP, MeOH; (e) Pd/C; (f) DIAD, PPh<sub>3</sub>; (g) (NH<sub>4</sub>)<sub>6</sub>Mo<sub>7</sub>O<sub>24</sub>·4H<sub>2</sub>O, H<sub>2</sub>O<sub>2</sub>.

D. Leighton *et al.* *J. Am. Chem. Soc.* **2011**, *133*, 7308. (Cont'd)

### Chiral Auxiliary Synthesis

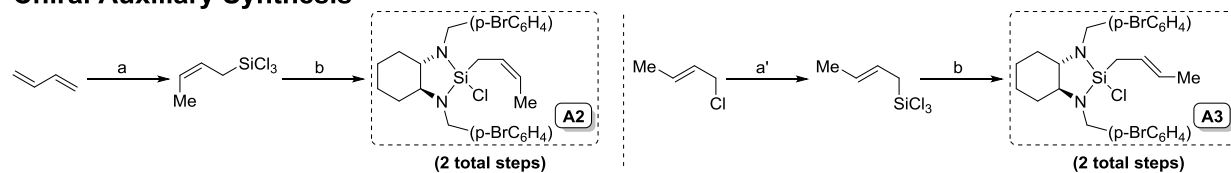

Key: (a) HSiCl<sub>3</sub>, Pd; (b) diamine, DBU  
(a') HSiCl<sub>3</sub>, NEt<sub>3</sub>, CuCl

### Fragment 3

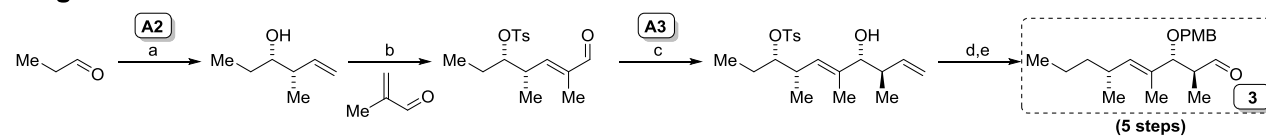

Key: (a) Sc(OTf)<sub>3</sub>; (b) Hoveyda-Grubbs-II, then TsCl, Et<sub>3</sub>N; (c) Sc(OTf)<sub>3</sub>; (d) KHMDS, PMBBr, then LiEt<sub>3</sub>H; (e) OsO<sub>4</sub>, NaIO<sub>4</sub>, 2,6-lutidine.

### Fragment Union and End Game

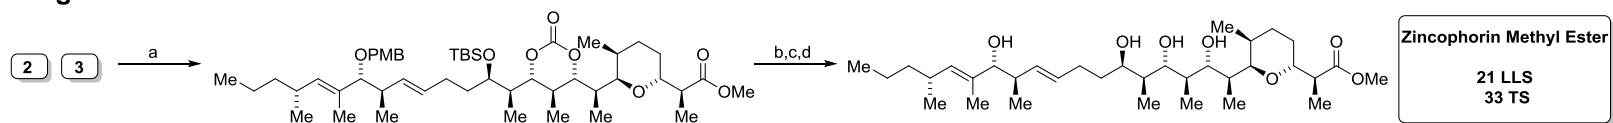

Key: (a) KHMDS; (b) DDQ, pH = 7 buffer; (c) NaOMe; (d) HF, H<sub>2</sub>O.

E. Guindon *et al. Tetrahedron* **2015**, *71*, 709.

## Reagents

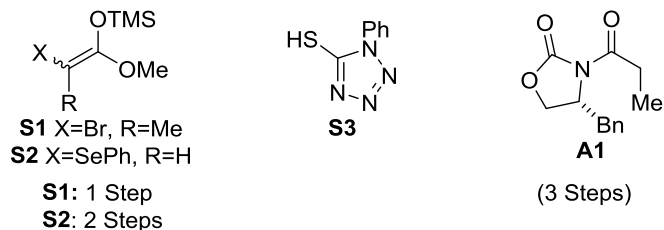

## Fragment 1

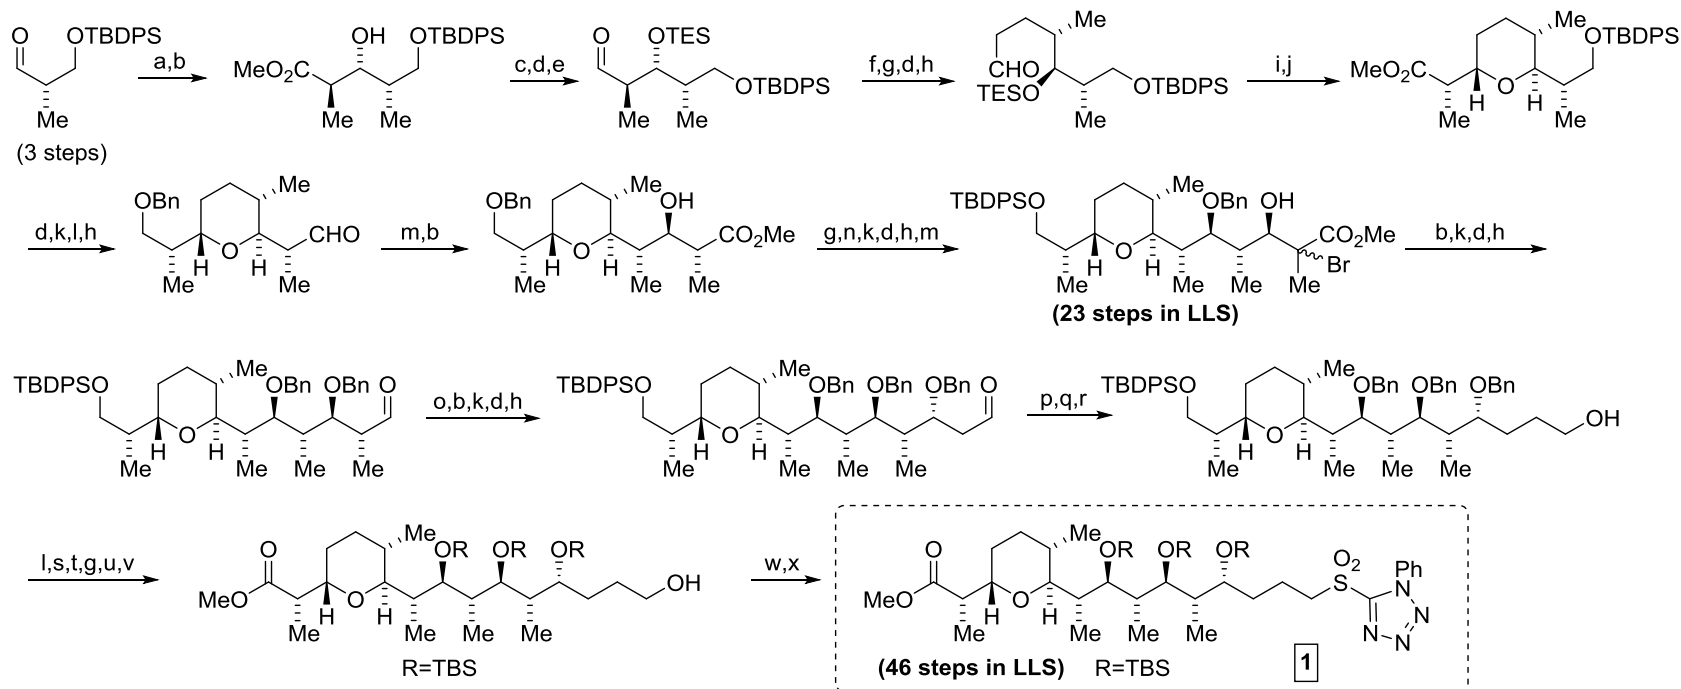

Key: (a)  $\text{BF}_3\text{OEt}_2$ , **S1**; (b)  $\text{Bu}_2\text{BOTf}$ , DIEA, then  $\text{Bu}_3\text{SnH}$ ,  $\text{BEt}_3$ , air; (c)  $\text{TESOTf}$ , 2,6-lutidine; (d) DIBAL-H; (e)  $(\text{COCl})_2$ , DMSO, then  $\text{Et}_3\text{N}$ ; (f)  $\text{Ph}_3\text{PC}(\text{H})=\text{CO}_2\text{Me}$ ; (g)  $\text{H}_2$ , Pd-C; (h) DMP,  $\text{NaHCO}_3$ ; (i)  $\text{BiBr}_3$ , **S1**; (j)  $\text{Ph}_3\text{SnH}$ ,  $\text{BEt}_3$ , air; (k)  $\text{BnO}=\text{CNHCl}_3$ ,  $\text{TfOH}$ ; (l) TBAF; (m)  $\text{TiCl}_4$ , **S1**; (n)  $\text{TBDPSCI}$ ,  $\text{Et}_3\text{N}$ , DMAP; (o)  $\text{BF}_3\text{OEt}_2$ , **S2**; (p)  $\text{MePPh}_3\text{Br}$ , *n*-BuLi; (q) 9-BBN, then  $\text{NaOH}/\text{H}_2\text{O}_2$ ; (r)  $\text{PivCl}$ , pyridine; (s)  $\text{NaClO}_2$ ,  $\text{NaH}_2\text{PO}_4$ , 2-methyl-2-butene; (t)  $\text{TMSCHN}_2$ ; (u)  $\text{TBSOTf}$ , 2,6-lutidine; (v)  $\text{K}_2\text{CO}_3$ ; (w) DIAD,  $\text{PPh}_3$ , **S3**; (x)  $(\text{NH}_4)_6\text{Mo}_7\text{O}_{24}\cdot 4\text{H}_2\text{O}$ ,  $\text{H}_2\text{O}_2$ .

E. Guindon *et al.* *Tetrahedron* **2015**, *71*, 709.

### Fragment 2

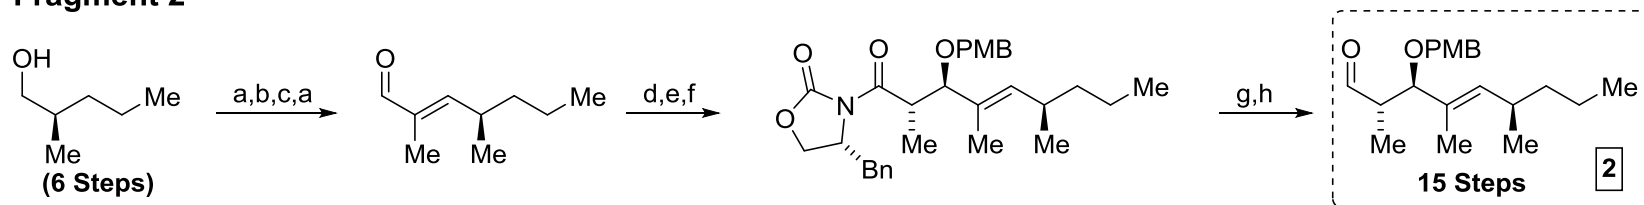

Key: (a)  $(\text{COCl})_2$ , DMSO, then  $\text{Et}_3\text{N}$ ; (b)  $\text{Ph}_3\text{P}=\text{C}(\text{Me})\text{CO}_2\text{Et}$ ; (c) DIBAL-H; (d)  $\text{MgCl}_2$ ,  $\text{Et}_3\text{N}$ , TMSCl, **A1**; (e) TFA; (f)  $\text{PMPOC}(\text{NH})\text{CCl}_3$ ; (g)  $\text{LiBH}_4$ ; (h) DMP,  $\text{NaHCO}_3$ .

### Fragment Union and End Game

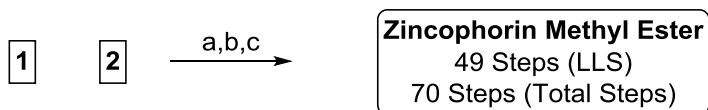

Key: (a) KHMDS; (b) DDQ, pH 7 buffer; (c) TBAF.



## Graphical Summary of Previous Syntheses of Cryptocaryol A

A. Mohapatra *et al.* *Eur. J. Org. Chem.* **2013**, 1051.

### Linear Synthesis

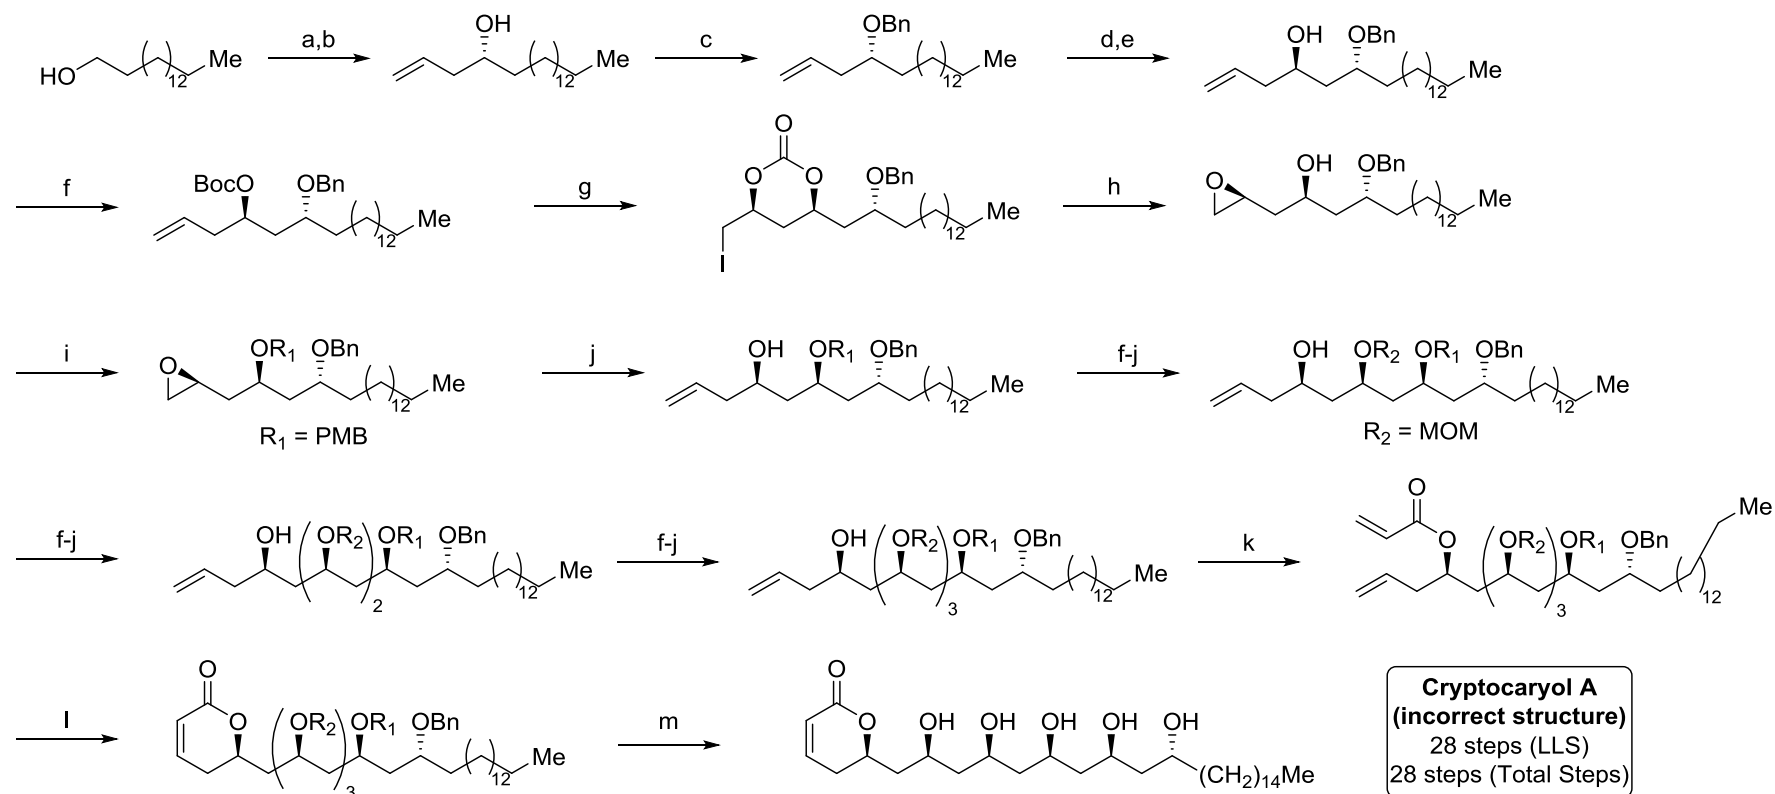

Key: (a) PCC,  $\text{CH}_2\text{Cl}_2$ , rt; (b)  $\text{TiCl}_4$ ,  $\text{Ti}(\text{O}i\text{Pr})_4$ , (*S*)-BINOL,  $\text{Ag}_2\text{O}$ , allyltributylstannane,  $-20\text{ }^\circ\text{C}$ ; (c) NaH, BnBr, THF,  $0\text{ }^\circ\text{C}$ ; (d)  $\text{OsO}_4$ , NaIO<sub>4</sub>, 2,6-lutidine, dioxane, rt; (e) allylTMS,  $\text{TiCl}_4$ ,  $-78\text{ }^\circ\text{C}$ ; (f)  $\text{Boc}_2\text{O}$ ,  $\text{Et}_3\text{N}$ ,  $\text{CH}_2\text{Cl}_2$ , rt; (g) NIS,  $\text{CH}_3\text{CN}$ ,  $-40$  to  $0\text{ }^\circ\text{C}$ ; (h)  $\text{K}_2\text{CO}_3$ , MeOH, rt; (i) first iteration: NaH, PMBCl, THF, DMF,  $0\text{ }^\circ\text{C}$  (subsequent iterations: NaH, MOMCl, THF, DMF,  $0\text{ }^\circ\text{C}$ ); (j) vinylmagnesium bromide, CuI, THF,  $-20\text{ }^\circ\text{C}$ ; (k) acryloyl chloride, DIPEA,  $\text{CH}_2\text{Cl}_2$ ,  $0\text{ }^\circ\text{C}$ ; (l) Grubbs I,  $\text{CH}_2\text{Cl}_2$ , reflux; (m)  $\text{TiCl}_4$ ,  $\text{CH}_2\text{Cl}_2$ , rt.



B. O'Doherty *et al.* *J. Am. Chem. Soc.* **2013**, *135*, 9334.

### Linear Synthesis

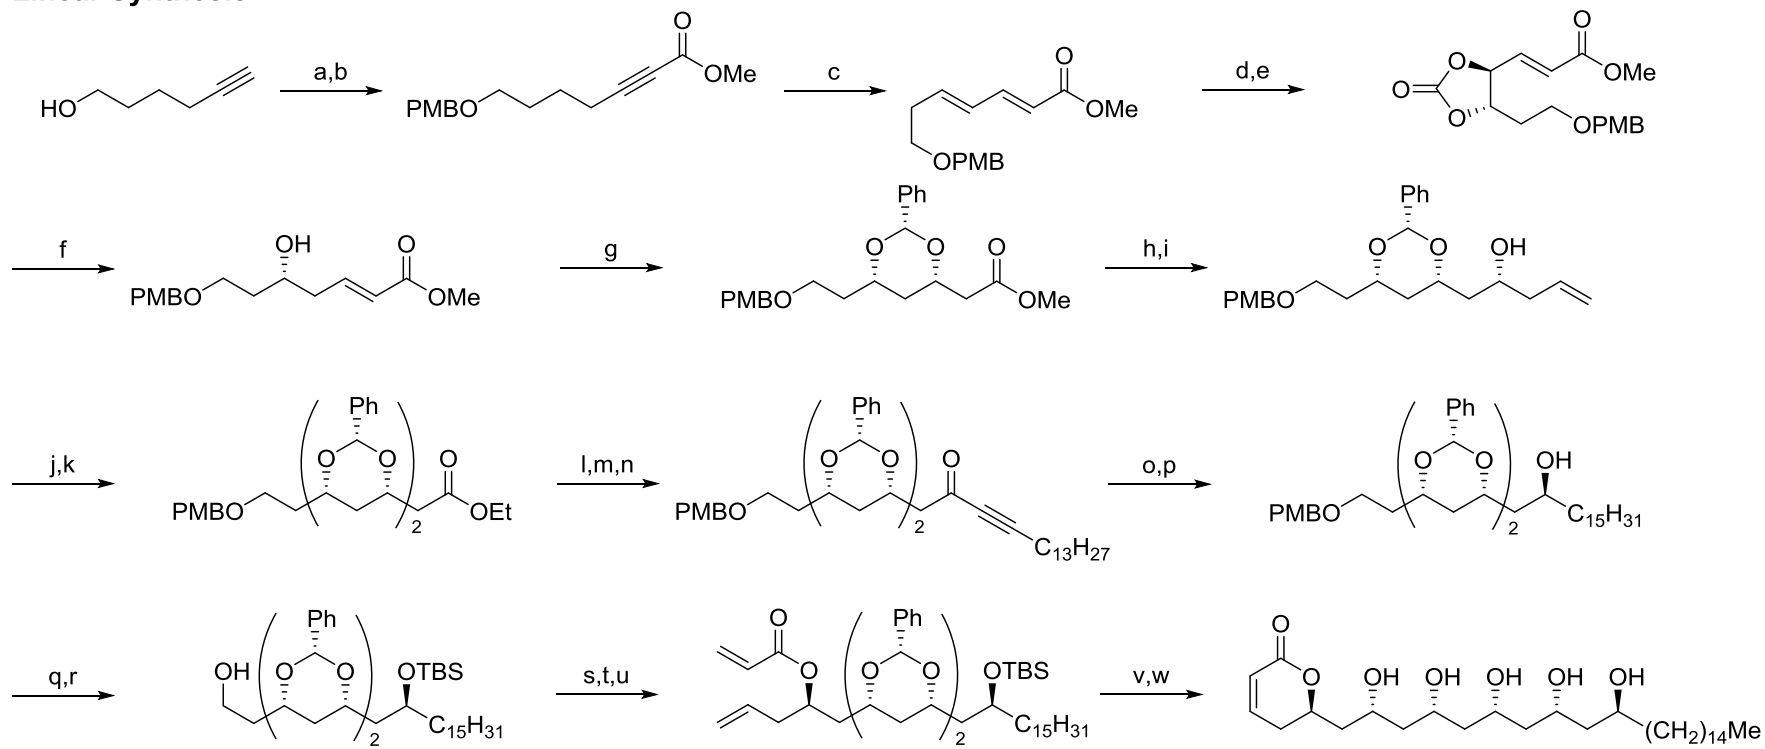

**(+)-Cryptocaryol A**  
23 steps (LLS)  
23 steps (Total Steps)

Key: (a) PMBCl, NaH, TFAB, 0 °C; (b) ClCO<sub>2</sub>Me, *n*-BuLi, THF, -78 to 0 °C; (c) PPh<sub>3</sub>, PhOH, benzene, 50 °C; (d) AD-mix- $\alpha$ , *t*-BuOH/H<sub>2</sub>O, 0 °C; (e) triphosgene, pyridine, DMAP, CH<sub>2</sub>Cl<sub>2</sub>, -78 °C; (f) PdPPh<sub>3</sub>, Et<sub>3</sub>N, HCO<sub>2</sub>H, THF, reflux; (g) PhCHO, KO<sup>t</sup>Bu, THF, 0 °C; (h) DIBALH, CH<sub>2</sub>Cl<sub>2</sub>, -78 °C; (i) (*R,R*)-Leighton, Sc(OTf)<sub>3</sub>, CH<sub>2</sub>Cl<sub>2</sub>, -10 °C, (j) ethyl acetate, Grubbs II, CH<sub>2</sub>Cl<sub>2</sub>; (k) PhCHO, KO<sup>t</sup>Bu, THF, 0 °C; (l) DIBALH, CH<sub>2</sub>Cl<sub>2</sub>, -78 °C; (m) 1-pentadecyne, *n*-BuLi, THF, -78 °C; (n) DMP, CH<sub>2</sub>Cl<sub>2</sub>, 0 °C; (o) (*R,R*)-Noyori, Et<sub>3</sub>N, HCO<sub>2</sub>H; (p) NBSH, Et<sub>3</sub>N, CH<sub>2</sub>Cl<sub>2</sub>; (q) TBSCl, imidazole, DMF; (r) DDQ, CH<sub>2</sub>Cl<sub>2</sub>, H<sub>2</sub>O, 0 °C; (s) DMP, CH<sub>2</sub>Cl<sub>2</sub>, 0 °C; (t) (*S,S*)-Leighton, Sc(OTf)<sub>3</sub>, CH<sub>2</sub>Cl<sub>2</sub>, -10 °C; (u) acrylic acid, DCC, DMAP, CH<sub>2</sub>Cl<sub>2</sub>; (v) Grubbs I, CH<sub>2</sub>Cl<sub>2</sub>, reflux; (w) AcOH/H<sub>2</sub>O = 4:1, 80 °C.



C. Cossy *et al.* *J. Org. Chem.* **2015**, *80*, 8668.

### Starting Materials

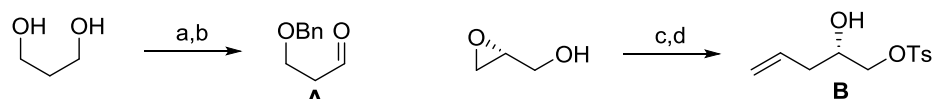

Key: (a) NaH, BnBr, *n*-Bu<sub>4</sub>NI, THF, rt, 7h; (b) PCC, NaOAc, 4 Å MS, CH<sub>2</sub>Cl<sub>2</sub>, rt, 3h; (c) TsCl, Et<sub>3</sub>N, DMAP, CH<sub>2</sub>Cl<sub>2</sub>, 0 °C to rt, 3 h; (d) Li<sub>2</sub>CuCl<sub>4</sub>, vinylmagnesium bromide, THF, -40 °C, 3h.

### Linear Synthesis

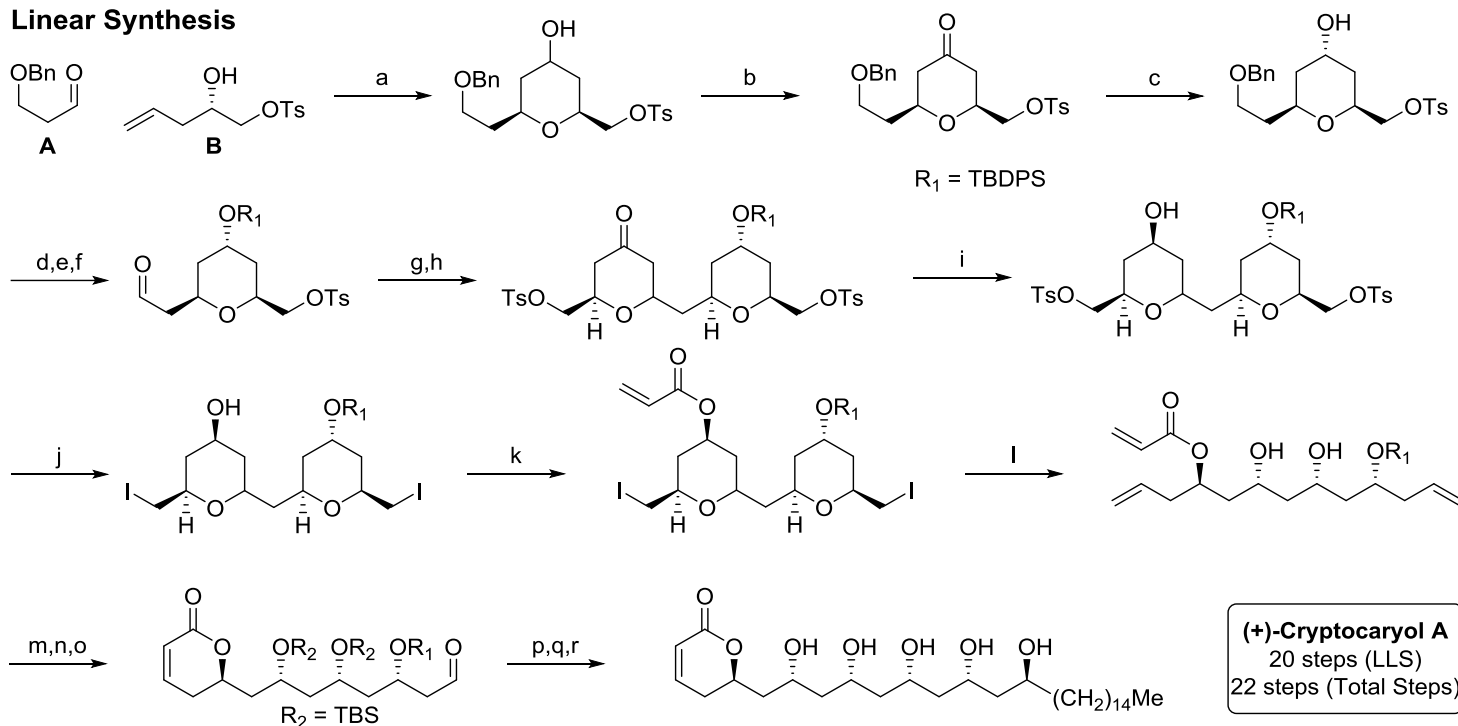

Key: (a) TFA, CH<sub>2</sub>Cl<sub>2</sub>, rt, 3 then NaHCO<sub>3</sub>, Et<sub>3</sub>N; (b) DMP, CH<sub>2</sub>Cl<sub>2</sub>, rt 2.5 h; (c) L-Selectride, THF, -78 °C, 1 h; (d) TBDPSCI, imidazole, CH<sub>2</sub>Cl<sub>2</sub>, rt, 14 h; (e) H<sub>2</sub>, Pd/C, MeOH, EtOAc, rt, 16 h; (f) TPAP, NMO, CH<sub>2</sub>Cl<sub>2</sub>, rt, 2 h; (g) **B**, TFA, CH<sub>2</sub>Cl<sub>2</sub>, rt, 3 h then Et<sub>3</sub>N, NaHCO<sub>3</sub> (aq); (h) DMP, CH<sub>2</sub>Cl<sub>2</sub>, rt, 2h; (i) NaBH<sub>4</sub>, MeOH, -40 °C, 1 h; (j) NaI, acetone, ∞w, 120 °C, 2 h; (k) acryloyl chloride, *i*Pr<sub>2</sub>NEt, CH<sub>2</sub>Cl<sub>2</sub>, 0 °C to rt, 3.5 h; (l) Zn, THF/H<sub>2</sub>O = 5:1, 70 °C, 1 h; (m) TBSOTf, 2,6-lutidine, CH<sub>2</sub>Cl<sub>2</sub>, -78 °C, 1 h; (n) Grubbs I (10 mol%), CH<sub>2</sub>Cl<sub>2</sub>, 45 °C, 2.5 h; (o) O<sub>3</sub>, CH<sub>2</sub>Cl<sub>2</sub>, -78 °C then PPH<sub>3</sub>; (p) (1) heptadecan-2-one, Cy<sub>2</sub>BCl, Et<sub>3</sub>N, pentane, 0 °C, 2 h (2) aldehyde, pentane, -78 °C to 40 °C, 4 h (3) MeOH/pH7 buffer/H<sub>2</sub>O<sub>2</sub>, -40 °C to rt, 16 h; (q) Me<sub>4</sub>NBH(OAc)<sub>3</sub>, CH<sub>3</sub>CN/MeOH = 1:1, -20 °C, 7 h; (r) HF•CH<sub>3</sub>CN, rt, 2.5 h.

### Linear Synthesis

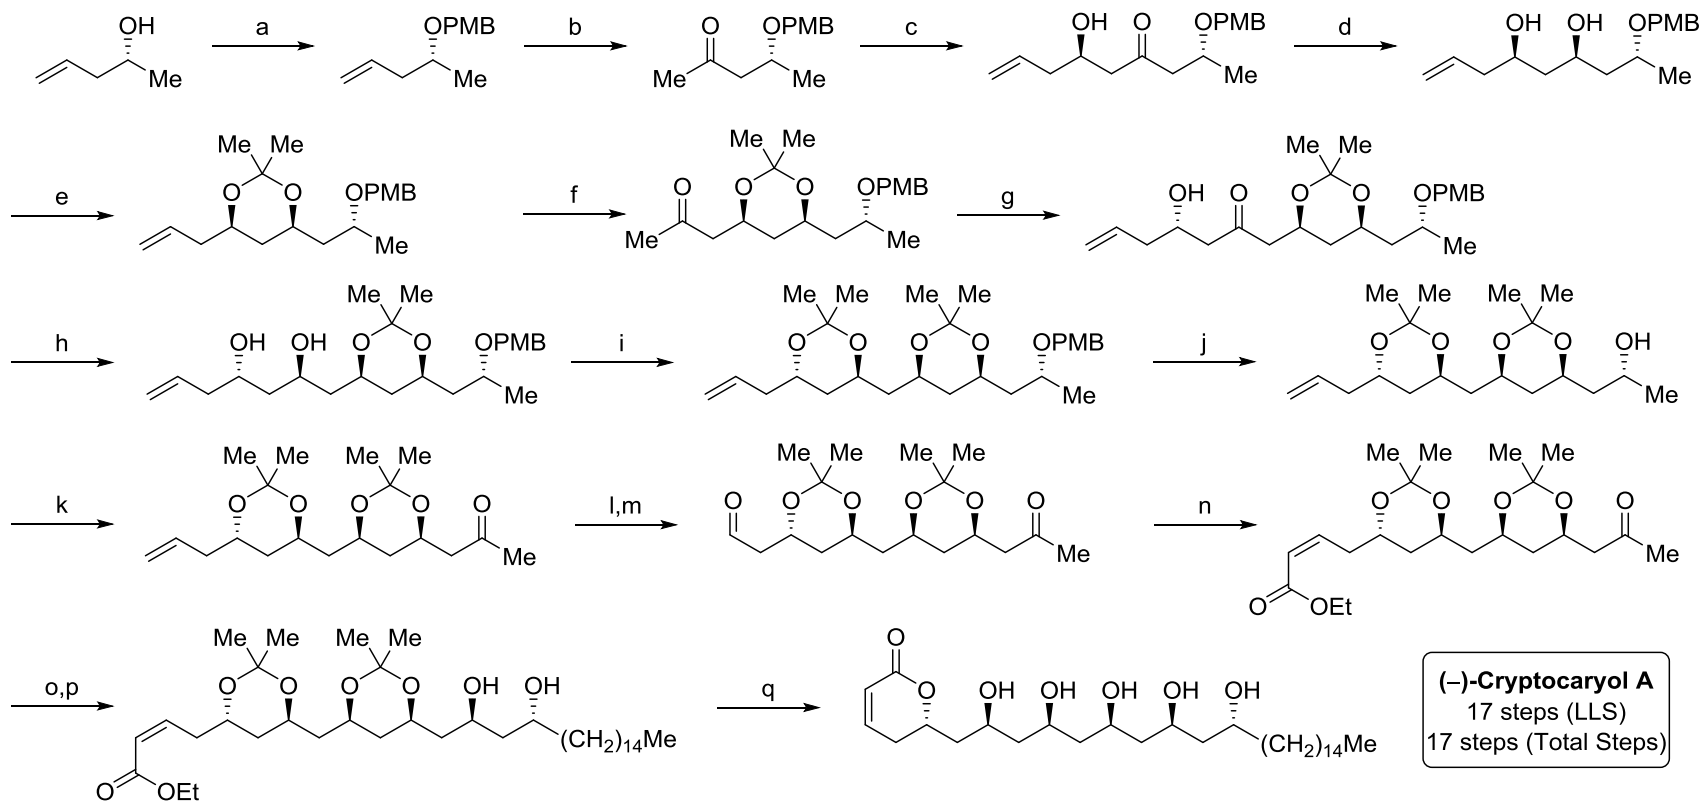

Key: (a) PMB trichloroacetimidate, CSA, CH<sub>2</sub>Cl<sub>2</sub>, rt; (b) PdCl<sub>2</sub>, CuCl, O<sub>2</sub>, DMF, H<sub>2</sub>O, rt; (c) (1) Cy<sub>2</sub>BCl, Et<sub>3</sub>N, Et<sub>2</sub>O, -30 °C (2) 3-butenal, -78 °C; (d) LiBH<sub>4</sub>, Et<sub>2</sub>BOMe, THF, MeOH, -78 °C; (e) 2,2-DMP, CSA, rt; (f) PdCl<sub>2</sub>, CuCl, O<sub>2</sub>, DMF, H<sub>2</sub>O, rt; (g) (1) Cy<sub>2</sub>BCl, Et<sub>3</sub>N, Et<sub>2</sub>O, -30 °C (2) 3-butenal, -78 °C; (h) Me<sub>4</sub>NHB(OAc)<sub>3</sub>, MeCN, AcOH, -30 to -20 °C; (i) 2,2-DMP, PPTS, rt; (j) DDQ, CH<sub>2</sub>Cl<sub>2</sub>, buffer, 0 °C; (k) (COCl)<sub>2</sub>, DMSO, Et<sub>3</sub>N, CH<sub>2</sub>Cl<sub>2</sub>, -78 °C; (l) OsO<sub>4</sub>, NMO, *t*-BuOH, THF, H<sub>2</sub>O, rt; (m) NaIO<sub>4</sub>, THF, H<sub>2</sub>O; (n) ethyl 2-(bis(*o*-tolylxy)phosphoryl)acetate, NaH, THF, -78 °C; (o) (1) Cy<sub>2</sub>BCl, Et<sub>3</sub>N, Et<sub>2</sub>O, -30 °C (2) palmitaldehyde, CH<sub>2</sub>Cl<sub>2</sub>, -78 °C; (p) Me<sub>4</sub>NHB(OAc)<sub>3</sub>, MeCN, AcOH, -30 to -20 °C; (q) CSA, MeOH.
